# Supplementary material for: Analogue signaling of somatodendritic synaptic activity to axon enhances GABA release in young cerebellar molecular layer interneurons
Source: eLife. 2023 Aug 11;12:e85971. doi: 10.7554/eLife.85971 (PMC10421593; doi:10.7554/eLife.85971)
Supplement: Figure 1—source data 1. [file elife-85971-fig1-data1.xlsx]

## Sheet: 1D
Data related to Figure 1D: axonal AP width as a function of age
Exp #	axAP width in µs	Age in days
1	480	28
2	540	30
3	340	31
4	370	31
5	400	30
6	450	30
7	430	30
8	290	30
9	240	30
10	392	30
11	430	30
12	390	31
13	660	13
14	700	30
15	670	24
16	310	24
17	281	27
18	210	27
19	420	27
20	260	30
21	290	28
22	350	28
23	260	28
24	310	32
25	310	34
26	720	15
27	570	14
28	450	17
29	1200	17
30	1200	16
31	825	16
32	473	17
33	650	17
34	1103	15
35	644	15
36	572	15
37	630	15
38	180	34
39	273	33
40	280	35
41	290	35
42	265	35
43	275	37
44	320	37
45	300	37
46	520	15
47	820	15
48	780	15
49	990	15
50	820	15
51	570	13
52	636	13
53	860	14
54	900	14
55	961	14
56	690	13
57	860	14
58	680	15
59	680	15
60	430	15
61	660	22
62	560	13
63	480	16
64	300	34
65	270	36
66	220	36
67	370	36
68	240	36
69	280	35
70	330	14
71	590	14
72	510	13
73	860	14
74	840	14
75	350	13
76	1170	12
77	350	12
78	480	15
79	700	15
80	950	15
81	320	14
82	310	13
83	400	13
84	360	13
85	380	13
86	470	13
87	330	16
88	380	15
89	640	15
90	650	15
91	610	15
92	850	15
93	900	15
94	560	15
95	640	16
96	380	16
97	510	16
98	410	14
99	560	15
100	790	13
101	310	13
102	440	13
103	670	15
104	490	13

## Sheet: 1E
Data related to Figure 1E: Box Plots of AxAP width in 2 age groups, young and mature
	Percentile 25	Median	Percentile 75	Percentile 10	Percentile 90
PN 13 to 17	460	630	820	350	954.4
PN > 33	265	280	300	204	340
