# Supplementary material for: Analogue signaling of somatodendritic synaptic activity to axon enhances GABA release in young cerebellar molecular layer interneurons
Source: eLife. 2023 Aug 11;12:e85971. doi: 10.7554/eLife.85971 (PMC10421593; doi:10.7554/eLife.85971)
Supplement: Figure 2—source data 1. [file elife-85971-fig2-data1.xlsx]

## Sheet: 2D
Data related to figure 2D: cross-correlation of somatic and axonal current-clamp recording
	Time delay (ms)	Correlation
	-150	-0.0409865
	-149.99	-0.0409016
	-149.98	-0.0408184
	-149.97	-0.0407395
	-149.96	-0.0406769
	-149.95	-0.040618
	-149.94	-0.0405636
	-149.93	-0.0405183
	-149.92	-0.0404789
	-149.91	-0.0404449
	-149.9	-0.0404117
	-149.89	-0.040386
	-149.88	-0.0403629
	-149.87	-0.040345
	-149.86	-0.040333
	-149.85	-0.0403211
	-149.84	-0.040315
	-149.83	-0.0403138
	-149.82	-0.0403178
	-149.81	-0.040329
	-149.8	-0.0403387
	-149.79	-0.0403563
	-149.78	-0.0403802
	-149.77	-0.0404118
	-149.76	-0.0404476
	-149.75	-0.0404868
	-149.74	-0.040539
	-149.73	-0.040595
	-149.72	-0.0406535
	-149.71	-0.04071
	-149.7	-0.0407694
	-149.69	-0.0408252
	-149.68	-0.0408804
	-149.67	-0.0409361
	-149.66	-0.0409902
	-149.65	-0.0410441
	-149.64	-0.0410976
	-149.63	-0.0411538
	-149.62	-0.0412109
	-149.61	-0.0412654
	-149.6	-0.0413239
	-149.59	-0.0413825
	-149.58	-0.0414409
	-149.57	-0.0414986
	-149.56	-0.0415549
	-149.55	-0.0416241
	-149.54	-0.0416925
	-149.53	-0.0417604
	-149.52	-0.0418293
	-149.51	-0.0418982
	-149.5	-0.0419608
	-149.49	-0.0420187
	-149.48	-0.0420756
	-149.47	-0.0421283
	-149.46	-0.0421789
	-149.45	-0.0422289
	-149.44	-0.0422874
	-149.43	-0.0423456
	-149.42	-0.0424049
	-149.41	-0.0424666
	-149.4	-0.042528
	-149.39	-0.0425904
	-149.38	-0.0426517
	-149.37	-0.0427123
	-149.36	-0.0427775
	-149.35	-0.0428414
	-149.34	-0.0429058
	-149.33	-0.0429698
	-149.32	-0.0430338
	-149.31	-0.0430959
	-149.3	-0.0431514
	-149.29	-0.0432065
	-149.28	-0.0432546
	-149.27	-0.0433002
	-149.26	-0.0433462
	-149.25	-0.0434025
	-149.24	-0.0434582
	-149.23	-0.043515
	-149.22	-0.0435767
	-149.21	-0.0436381
	-149.2	-0.0436989
	-149.19	-0.0437548
	-149.18	-0.0438106
	-149.17	-0.0438639
	-149.16	-0.0439155
	-149.15	-0.043968
	-149.14	-0.0440165
	-149.13	-0.0440646
	-149.12	-0.0441122
	-149.11	-0.0441562
	-149.1	-0.0441998
	-149.09	-0.0442326
	-149.08	-0.0442644
	-149.07	-0.0442965
	-149.06	-0.0443301
	-149.05	-0.044363
	-149.04	-0.0443963
	-149.03	-0.0444402
	-149.02	-0.0444837
	-149.01	-0.0445264
	-149	-0.0445635
	-148.99	-0.0446006
	-148.98	-0.0446339
	-148.97	-0.0446646
	-148.96	-0.044696
	-148.95	-0.0447254
	-148.94	-0.0447546
	-148.93	-0.0447829
	-148.92	-0.0448099
	-148.91	-0.0448366
	-148.9	-0.0448574
	-148.89	-0.0448795
	-148.88	-0.044902
	-148.87	-0.0449232
	-148.86	-0.044945
	-148.85	-0.0449671
	-148.84	-0.0450057
	-148.83	-0.0450441
	-148.82	-0.0450813
	-148.81	-0.0451186
	-148.8	-0.0451556
	-148.79	-0.0451874
	-148.78	-0.0452143
	-148.77	-0.0452418
	-148.76	-0.0452655
	-148.75	-0.0452886
	-148.74	-0.045311
	-148.73	-0.0453353
	-148.72	-0.0453584
	-148.71	-0.0453802
	-148.7	-0.0454032
	-148.69	-0.0454261
	-148.68	-0.0454485
	-148.67	-0.0454723
	-148.66	-0.045496
	-148.65	-0.0455265
	-148.64	-0.0455559
	-148.63	-0.045584
	-148.62	-0.0456125
	-148.61	-0.0456398
	-148.6	-0.0456642
	-148.59	-0.0456813
	-148.58	-0.0456985
	-148.57	-0.0457091
	-148.56	-0.0457182
	-148.55	-0.0457269
	-148.54	-0.0457411
	-148.53	-0.0457533
	-148.52	-0.0457647
	-148.51	-0.0457801
	-148.5	-0.0457952
	-148.49	-0.0458097
	-148.48	-0.045824
	-148.47	-0.045839
	-148.46	-0.0458536
	-148.45	-0.0458668
	-148.44	-0.0458795
	-148.43	-0.0458913
	-148.42	-0.045902
	-148.41	-0.0459124
	-148.4	-0.0459203
	-148.39	-0.0459292
	-148.38	-0.0459292
	-148.37	-0.0459286
	-148.36	-0.0459283
	-148.35	-0.0459291
	-148.34	-0.0459281
	-148.33	-0.0459272
	-148.32	-0.0459376
	-148.31	-0.0459482
	-148.3	-0.0459604
	-148.29	-0.0459714
	-148.28	-0.0459837
	-148.27	-0.0459961
	-148.26	-0.0460063
	-148.25	-0.0460169
	-148.24	-0.0460274
	-148.23	-0.0460369
	-148.22	-0.0460468
	-148.21	-0.0460558
	-148.2	-0.046066
	-148.19	-0.0460719
	-148.18	-0.046078
	-148.17	-0.0460849
	-148.16	-0.0460888
	-148.15	-0.0460912
	-148.14	-0.0460936
	-148.13	-0.0461132
	-148.12	-0.046133
	-148.11	-0.0461538
	-148.1	-0.0461766
	-148.09	-0.0462004
	-148.08	-0.0462216
	-148.07	-0.046237
	-148.06	-0.046252
	-148.05	-0.0462626
	-148.04	-0.0462717
	-148.03	-0.0462808
	-148.02	-0.0462881
	-148.01	-0.0462959
	-148	-0.0463032
	-147.99	-0.0463103
	-147.98	-0.0463174
	-147.97	-0.0463204
	-147.96	-0.0463233
	-147.95	-0.0463259
	-147.94	-0.0463359
	-147.93	-0.0463458
	-147.92	-0.046356
	-147.91	-0.0463702
	-147.9	-0.0463848
	-147.89	-0.0463975
	-147.88	-0.0464016
	-147.87	-0.0464052
	-147.86	-0.0464016
	-147.85	-0.0463961
	-147.84	-0.0463908
	-147.83	-0.0463879
	-147.82	-0.0463852
	-147.81	-0.0463828
	-147.8	-0.0463835
	-147.79	-0.0463841
	-147.78	-0.0463813
	-147.77	-0.0463797
	-147.76	-0.0463781
	-147.75	-0.0463766
	-147.74	-0.0463753
	-147.73	-0.0463748
	-147.72	-0.0463796
	-147.71	-0.0463845
	-147.7	-0.0463889
	-147.69	-0.0463902
	-147.68	-0.046391
	-147.67	-0.046382
	-147.66	-0.0463711
	-147.65	-0.0463608
	-147.64	-0.0463509
	-147.63	-0.0463407
	-147.62	-0.046331
	-147.61	-0.0463309
	-147.6	-0.04633
	-147.59	-0.0463285
	-147.58	-0.0463265
	-147.57	-0.0463243
	-147.56	-0.0463232
	-147.55	-0.0463213
	-147.54	-0.04632
	-147.53	-0.0463228
	-147.52	-0.0463246
	-147.51	-0.046326
	-147.5	-0.0463256
	-147.49	-0.0463245
	-147.48	-0.0463174
	-147.47	-0.0463082
	-147.46	-0.0462996
	-147.45	-0.046288
	-147.44	-0.0462759
	-147.43	-0.0462647
	-147.42	-0.04627
	-147.41	-0.0462746
	-147.4	-0.0462791
	-147.39	-0.0462857
	-147.38	-0.0462927
	-147.37	-0.0462998
	-147.36	-0.0463037
	-147.35	-0.0463094
	-147.34	-0.0463142
	-147.33	-0.0463188
	-147.32	-0.046324
	-147.31	-0.0463254
	-147.3	-0.0463271
	-147.29	-0.0463286
	-147.28	-0.0463295
	-147.27	-0.0463325
	-147.26	-0.0463317
	-147.25	-0.0463331
	-147.24	-0.0463364
	-147.23	-0.0463487
	-147.22	-0.0463612
	-147.21	-0.0463743
	-147.2	-0.0463939
	-147.19	-0.0464147
	-147.18	-0.0464363
	-147.17	-0.0464522
	-147.16	-0.0464704
	-147.15	-0.0464852
	-147.14	-0.0464995
	-147.13	-0.0465146
	-147.12	-0.046529
	-147.11	-0.0465432
	-147.1	-0.0465575
	-147.09	-0.046574
	-147.08	-0.0465917
	-147.07	-0.0466061
	-147.06	-0.046624
	-147.05	-0.046643
	-147.04	-0.0466621
	-147.03	-0.0466806
	-147.02	-0.0466986
	-147.01	-0.0467257
	-147	-0.0467524
	-146.99	-0.0467792
	-146.98	-0.0468039
	-146.97	-0.0468291
	-146.96	-0.0468465
	-146.95	-0.0468603
	-146.94	-0.0468731
	-146.93	-0.0468826
	-146.92	-0.0468894
	-146.91	-0.0468949
	-146.9	-0.0469057
	-146.89	-0.0469153
	-146.88	-0.0469237
	-146.87	-0.0469325
	-146.86	-0.0469402
	-146.85	-0.0469473
	-146.84	-0.0469516
	-146.83	-0.0469539
	-146.82	-0.0469616
	-146.81	-0.0469666
	-146.8	-0.04697
	-146.79	-0.0469721
	-146.78	-0.0469729
	-146.77	-0.0469672
	-146.76	-0.046955
	-146.75	-0.0469408
	-146.74	-0.0469192
	-146.73	-0.0468936
	-146.72	-0.0468664
	-146.71	-0.0468506
	-146.7	-0.0468334
	-146.69	-0.0468159
	-146.68	-0.0468003
	-146.67	-0.0467841
	-146.66	-0.0467666
	-146.65	-0.046745
	-146.64	-0.0467229
	-146.63	-0.0466994
	-146.62	-0.0466746
	-146.61	-0.0466503
	-146.6	-0.0466224
	-146.59	-0.046595
	-146.58	-0.0465669
	-146.57	-0.046535
	-146.56	-0.0465035
	-146.55	-0.0464637
	-146.54	-0.0464236
	-146.53	-0.0463844
	-146.52	-0.046353
	-146.51	-0.0463225
	-146.5	-0.0462934
	-146.49	-0.0462729
	-146.48	-0.046254
	-146.47	-0.0462354
	-146.46	-0.0462118
	-146.45	-0.0461895
	-146.44	-0.046165
	-146.43	-0.0461404
	-146.42	-0.0461175
	-146.41	-0.046094
	-146.4	-0.0460717
	-146.39	-0.0460498
	-146.38	-0.0460283
	-146.37	-0.0460075
	-146.36	-0.0459798
	-146.35	-0.0459548
	-146.34	-0.0459308
	-146.33	-0.0459075
	-146.32	-0.0458855
	-146.31	-0.0458649
	-146.3	-0.0458594
	-146.29	-0.0458547
	-146.28	-0.0458505
	-146.27	-0.045845
	-146.26	-0.04584
	-146.25	-0.0458305
	-146.24	-0.045819
	-146.23	-0.0458088
	-146.22	-0.0457979
	-146.21	-0.0457875
	-146.2	-0.0457775
	-146.19	-0.045771
	-146.18	-0.0457644
	-146.17	-0.045757
	-146.16	-0.0457519
	-146.15	-0.0457479
	-146.14	-0.045746
	-146.13	-0.0457458
	-146.12	-0.0457473
	-146.11	-0.0457618
	-146.1	-0.0457764
	-146.09	-0.0457917
	-146.08	-0.0458088
	-146.07	-0.0458261
	-146.06	-0.0458403
	-146.05	-0.0458492
	-146.04	-0.0458595
	-146.03	-0.0458661
	-146.02	-0.0458719
	-146.01	-0.0458786
	-146	-0.0458936
	-145.99	-0.0459075
	-145.98	-0.0459218
	-145.97	-0.0459384
	-145.96	-0.0459554
	-145.95	-0.045973
	-145.94	-0.0459903
	-145.93	-0.0460088
	-145.92	-0.0460289
	-145.91	-0.0460474
	-145.9	-0.0460659
	-145.89	-0.0460812
	-145.88	-0.0460955
	-145.87	-0.0461089
	-145.86	-0.0461166
	-145.85	-0.0461252
	-145.84	-0.0461249
	-145.83	-0.0461229
	-145.82	-0.0461213
	-145.81	-0.0461233
	-145.8	-0.046123
	-145.79	-0.0461221
	-145.78	-0.0461271
	-145.77	-0.0461321
	-145.76	-0.0461368
	-145.75	-0.0461379
	-145.74	-0.0461399
	-145.73	-0.04614
	-145.72	-0.0461379
	-145.71	-0.0461354
	-145.7	-0.0461306
	-145.69	-0.0461247
	-145.68	-0.0461179
	-145.67	-0.0461098
	-145.66	-0.046103
	-145.65	-0.046088
	-145.64	-0.0460743
	-145.63	-0.0460611
	-145.62	-0.0460455
	-145.61	-0.0460288
	-145.6	-0.0460117
	-145.59	-0.0460099
	-145.58	-0.046009
	-145.57	-0.0460089
	-145.56	-0.0460091
	-145.55	-0.0460109
	-145.54	-0.0460099
	-145.53	-0.0460062
	-145.52	-0.0460025
	-145.51	-0.0459963
	-145.5	-0.0459898
	-145.49	-0.0459834
	-145.48	-0.0459775
	-145.47	-0.045973
	-145.46	-0.0459668
	-145.45	-0.0459624
	-145.44	-0.0459585
	-145.43	-0.0459527
	-145.42	-0.0459472
	-145.41	-0.0459412
	-145.4	-0.0459495
	-145.39	-0.0459584
	-145.38	-0.0459676
	-145.37	-0.0459814
	-145.36	-0.0459959
	-145.35	-0.0460079
	-145.34	-0.0460131
	-145.33	-0.0460177
	-145.32	-0.046017
	-145.31	-0.0460151
	-145.3	-0.0460132
	-145.29	-0.0460153
	-145.28	-0.0460179
	-145.27	-0.0460211
	-145.26	-0.0460273
	-145.25	-0.0460333
	-145.24	-0.0460373
	-145.23	-0.046042
	-145.22	-0.0460466
	-145.21	-0.0460549
	-145.2	-0.0460633
	-145.19	-0.0460729
	-145.18	-0.0460858
	-145.17	-0.0460991
	-145.16	-0.0461126
	-145.15	-0.0461201
	-145.14	-0.0461274
	-145.13	-0.0461264
	-145.12	-0.0461235
	-145.11	-0.0461219
	-145.1	-0.0461243
	-145.09	-0.0461266
	-145.08	-0.0461305
	-145.07	-0.0461413
	-145.06	-0.046152
	-145.05	-0.0461629
	-145.04	-0.0461729
	-145.03	-0.0461836
	-145.02	-0.0461954
	-145.01	-0.0462068
	-145	-0.0462204
	-144.99	-0.0462377
	-144.98	-0.0462551
	-144.97	-0.0462732
	-144.96	-0.0462894
	-144.95	-0.0463059
	-144.94	-0.046314
	-144.93	-0.046321
	-144.92	-0.0463298
	-144.91	-0.0463371
	-144.9	-0.0463442
	-144.89	-0.046353
	-144.88	-0.0463772
	-144.87	-0.0464013
	-144.86	-0.0464259
	-144.85	-0.0464501
	-144.84	-0.0464751
	-144.83	-0.0465001
	-144.82	-0.0465229
	-144.81	-0.0465477
	-144.8	-0.0465717
	-144.79	-0.0465954
	-144.78	-0.0466191
	-144.77	-0.0466394
	-144.76	-0.0466595
	-144.75	-0.0466761
	-144.74	-0.0466913
	-144.73	-0.0467077
	-144.72	-0.0467204
	-144.71	-0.0467336
	-144.7	-0.0467473
	-144.69	-0.0467752
	-144.68	-0.0468026
	-144.67	-0.0468288
	-144.66	-0.0468584
	-144.65	-0.0468884
	-144.64	-0.0469164
	-144.63	-0.0469379
	-144.62	-0.0469605
	-144.61	-0.0469785
	-144.6	-0.0469958
	-144.59	-0.0470123
	-144.58	-0.0470263
	-144.57	-0.0470395
	-144.56	-0.0470512
	-144.55	-0.0470639
	-144.54	-0.0470771
	-144.53	-0.0470859
	-144.52	-0.0470974
	-144.51	-0.0471093
	-144.5	-0.0471244
	-144.49	-0.0471389
	-144.48	-0.0471522
	-144.47	-0.0471712
	-144.46	-0.0471901
	-144.45	-0.0472088
	-144.44	-0.0472225
	-144.43	-0.0472371
	-144.42	-0.0472445
	-144.41	-0.0472501
	-144.4	-0.0472552
	-144.39	-0.0472603
	-144.38	-0.0472642
	-144.37	-0.0472675
	-144.36	-0.0472759
	-144.35	-0.0472846
	-144.34	-0.0472929
	-144.33	-0.0473037
	-144.32	-0.0473151
	-144.31	-0.0473279
	-144.3	-0.0473399
	-144.29	-0.0473517
	-144.28	-0.0473711
	-144.27	-0.0473898
	-144.26	-0.0474091
	-144.25	-0.0474284
	-144.24	-0.0474484
	-144.23	-0.0474613
	-144.22	-0.0474715
	-144.21	-0.0474817
	-144.2	-0.0474885
	-144.19	-0.0474931
	-144.18	-0.047498
	-144.17	-0.0475163
	-144.16	-0.0475346
	-144.15	-0.0475551
	-144.14	-0.0475772
	-144.13	-0.0475998
	-144.12	-0.0476239
	-144.11	-0.0476456
	-144.1	-0.0476674
	-144.09	-0.0476901
	-144.08	-0.0477118
	-144.07	-0.0477344
	-144.06	-0.0477544
	-144.05	-0.0477749
	-144.04	-0.0477932
	-144.03	-0.0478075
	-144.02	-0.0478222
	-144.01	-0.0478306
	-144	-0.0478374
	-143.99	-0.047845
	-143.98	-0.0478663
	-143.97	-0.0478878
	-143.96	-0.0479105
	-143.95	-0.0479384
	-143.94	-0.0479672
	-143.93	-0.0479953
	-143.92	-0.048017
	-143.91	-0.0480392
	-143.9	-0.0480575
	-143.89	-0.0480748
	-143.88	-0.0480934
	-143.87	-0.0481083
	-143.86	-0.0481243
	-143.85	-0.0481402
	-143.84	-0.0481557
	-143.83	-0.0481719
	-143.82	-0.0481803
	-143.81	-0.0481903
	-143.8	-0.0482012
	-143.79	-0.0482158
	-143.78	-0.0482313
	-143.77	-0.0482478
	-143.76	-0.0482742
	-143.75	-0.0483013
	-143.74	-0.0483281
	-143.73	-0.048349
	-143.72	-0.0483705
	-143.71	-0.0483861
	-143.7	-0.0484002
	-143.69	-0.0484154
	-143.68	-0.0484303
	-143.67	-0.0484459
	-143.66	-0.0484618
	-143.65	-0.0484806
	-143.64	-0.0484995
	-143.63	-0.0485154
	-143.62	-0.0485344
	-143.61	-0.048554
	-143.6	-0.048575
	-143.59	-0.0485971
	-143.58	-0.0486203
	-143.57	-0.0486569
	-143.56	-0.0486938
	-143.55	-0.0487306
	-143.54	-0.0487674
	-143.53	-0.0488044
	-143.52	-0.0488351
	-143.51	-0.0488628
	-143.5	-0.0488918
	-143.49	-0.0489189
	-143.48	-0.0489461
	-143.47	-0.0489741
	-143.46	-0.0490116
	-143.45	-0.0490486
	-143.44	-0.0490862
	-143.43	-0.0491258
	-143.42	-0.0491658
	-143.41	-0.049208
	-143.4	-0.0492508
	-143.39	-0.0492945
	-143.38	-0.0493427
	-143.37	-0.0493898
	-143.36	-0.0494367
	-143.35	-0.0494811
	-143.34	-0.0495246
	-143.33	-0.049565
	-143.32	-0.0495997
	-143.31	-0.0496349
	-143.3	-0.0496636
	-143.29	-0.0496907
	-143.28	-0.0497173
	-143.27	-0.0497536
	-143.26	-0.0497875
	-143.25	-0.0498201
	-143.24	-0.0498559
	-143.23	-0.0498905
	-143.22	-0.0499241
	-143.21	-0.049953
	-143.2	-0.0499814
	-143.19	-0.0500063
	-143.18	-0.0500282
	-143.17	-0.0500484
	-143.16	-0.0500617
	-143.15	-0.0500723
	-143.14	-0.0500804
	-143.13	-0.050085
	-143.12	-0.0500887
	-143.11	-0.050082
	-143.1	-0.0500744
	-143.09	-0.0500653
	-143.08	-0.0500563
	-143.07	-0.0500436
	-143.06	-0.0500285
	-143.05	-0.0500221
	-143.04	-0.0500141
	-143.03	-0.050005
	-143.02	-0.0499902
	-143.01	-0.0499747
	-143	-0.049954
	-142.99	-0.0499289
	-142.98	-0.0499018
	-142.97	-0.0498705
	-142.96	-0.0498365
	-142.95	-0.0498008
	-142.94	-0.0497642
	-142.93	-0.0497272
	-142.92	-0.0496853
	-142.91	-0.0496452
	-142.9	-0.0496045
	-142.89	-0.0495616
	-142.88	-0.0495169
	-142.87	-0.049471
	-142.86	-0.0494401
	-142.85	-0.0494087
	-142.84	-0.0493772
	-142.83	-0.0493467
	-142.82	-0.0493168
	-142.81	-0.0492817
	-142.8	-0.0492408
	-142.79	-0.0491994
	-142.78	-0.0491533
	-142.77	-0.0491056
	-142.76	-0.0490579
	-142.75	-0.0490147
	-142.74	-0.0489723
	-142.73	-0.0489308
	-142.72	-0.0488914
	-142.71	-0.0488523
	-142.7	-0.048813
	-142.69	-0.0487737
	-142.68	-0.0487344
	-142.67	-0.0487014
	-142.66	-0.0486685
	-142.65	-0.0486365
	-142.64	-0.0486062
	-142.63	-0.0485767
	-142.62	-0.0485453
	-142.61	-0.0485066
	-142.6	-0.0484679
	-142.59	-0.0484221
	-142.58	-0.0483746
	-142.57	-0.0483281
	-142.56	-0.0482895
	-142.55	-0.0482517
	-142.54	-0.0482151
	-142.53	-0.0481837
	-142.52	-0.0481528
	-142.51	-0.0481214
	-142.5	-0.0480885
	-142.49	-0.0480563
	-142.48	-0.0480236
	-142.47	-0.0479911
	-142.46	-0.0479603
	-142.45	-0.0479293
	-142.44	-0.047899
	-142.43	-0.047869
	-142.42	-0.0478366
	-142.41	-0.0478044
	-142.4	-0.0477623
	-142.39	-0.0477201
	-142.38	-0.0476793
	-142.37	-0.047641
	-142.36	-0.0476033
	-142.35	-0.047567
	-142.34	-0.047543
	-142.33	-0.0475193
	-142.32	-0.0474962
	-142.31	-0.0474708
	-142.3	-0.0474463
	-142.29	-0.0474212
	-142.28	-0.0473953
	-142.27	-0.0473712
	-142.26	-0.0473476
	-142.25	-0.0473243
	-142.24	-0.047301
	-142.23	-0.0472769
	-142.22	-0.0472526
	-142.21	-0.047223
	-142.2	-0.0471945
	-142.19	-0.0471671
	-142.18	-0.0471385
	-142.17	-0.0471103
	-142.16	-0.0470831
	-142.15	-0.047074
	-142.14	-0.0470648
	-142.13	-0.0470552
	-142.12	-0.0470472
	-142.11	-0.0470393
	-142.1	-0.0470289
	-142.09	-0.0470142
	-142.08	-0.0470008
	-142.07	-0.0469846
	-142.06	-0.046968
	-142.05	-0.0469513
	-142.04	-0.046934
	-142.03	-0.046916
	-142.02	-0.0468973
	-142.01	-0.0468795
	-142	-0.0468626
	-141.99	-0.0468444
	-141.98	-0.0468281
	-141.97	-0.0468129
	-141.96	-0.0468059
	-141.95	-0.0467984
	-141.94	-0.0467905
	-141.93	-0.0467859
	-141.92	-0.0467814
	-141.91	-0.0467759
	-141.9	-0.0467634
	-141.89	-0.046752
	-141.88	-0.0467352
	-141.87	-0.0467168
	-141.86	-0.0466987
	-141.85	-0.0466836
	-141.84	-0.0466672
	-141.83	-0.0466508
	-141.82	-0.0466378
	-141.81	-0.0466254
	-141.8	-0.0466122
	-141.79	-0.0466005
	-141.78	-0.0465899
	-141.77	-0.0465796
	-141.76	-0.0465683
	-141.75	-0.0465568
	-141.74	-0.046548
	-141.73	-0.0465386
	-141.72	-0.0465296
	-141.71	-0.0465182
	-141.7	-0.0465081
	-141.69	-0.0464893
	-141.68	-0.0464689
	-141.67	-0.0464489
	-141.66	-0.0464287
	-141.65	-0.0464071
	-141.64	-0.046386
	-141.63	-0.0463753
	-141.62	-0.0463657
	-141.61	-0.046358
	-141.6	-0.0463508
	-141.59	-0.0463453
	-141.58	-0.046341
	-141.57	-0.0463356
	-141.56	-0.046331
	-141.55	-0.0463287
	-141.54	-0.0463266
	-141.53	-0.0463257
	-141.52	-0.0463249
	-141.51	-0.0463261
	-141.5	-0.0463233
	-141.49	-0.04632
	-141.48	-0.0463185
	-141.47	-0.0463135
	-141.46	-0.0463081
	-141.45	-0.0463037
	-141.44	-0.0463171
	-141.43	-0.046332
	-141.42	-0.0463489
	-141.41	-0.0463693
	-141.4	-0.0463916
	-141.39	-0.046413
	-141.38	-0.0464304
	-141.37	-0.0464484
	-141.36	-0.0464636
	-141.35	-0.0464788
	-141.34	-0.0464949
	-141.33	-0.0465088
	-141.32	-0.0465242
	-141.31	-0.0465394
	-141.3	-0.0465543
	-141.29	-0.0465698
	-141.28	-0.0465794
	-141.27	-0.0465899
	-141.26	-0.0466007
	-141.25	-0.04662
	-141.24	-0.04664
	-141.23	-0.0466602
	-141.22	-0.046687
	-141.21	-0.0467143
	-141.2	-0.0467402
	-141.19	-0.0467584
	-141.18	-0.0467764
	-141.17	-0.0467889
	-141.16	-0.0468
	-141.15	-0.0468116
	-141.14	-0.046824
	-141.13	-0.0468366
	-141.12	-0.0468493
	-141.11	-0.0468642
	-141.1	-0.0468785
	-141.09	-0.0468883
	-141.08	-0.0469
	-141.07	-0.0469116
	-141.06	-0.0469239
	-141.05	-0.0469364
	-141.04	-0.0469496
	-141.03	-0.0469722
	-141.02	-0.0469942
	-141.01	-0.047016
	-141	-0.0470348
	-140.99	-0.0470528
	-140.98	-0.0470627
	-140.97	-0.0470698
	-140.96	-0.0470773
	-140.95	-0.0470848
	-140.94	-0.0470913
	-140.93	-0.047098
	-140.92	-0.0471117
	-140.91	-0.047124
	-140.9	-0.0471355
	-140.89	-0.0471469
	-140.88	-0.0471579
	-140.87	-0.0471706
	-140.86	-0.0471824
	-140.85	-0.0471948
	-140.84	-0.0472137
	-140.83	-0.0472308
	-140.82	-0.0472474
	-140.81	-0.0472619
	-140.8	-0.0472751
	-140.79	-0.0472827
	-140.78	-0.0472855
	-140.77	-0.0472888
	-140.76	-0.0472876
	-140.75	-0.0472847
	-140.74	-0.0472822
	-140.73	-0.0472927
	-140.72	-0.0473017
	-140.71	-0.0473105
	-140.7	-0.0473204
	-140.69	-0.0473305
	-140.68	-0.0473406
	-140.67	-0.0473477
	-140.66	-0.0473561
	-140.65	-0.0473634
	-140.64	-0.0473695
	-140.63	-0.0473754
	-140.62	-0.0473757
	-140.61	-0.0473756
	-140.6	-0.0473741
	-140.59	-0.0473695
	-140.58	-0.0473667
	-140.57	-0.0473568
	-140.56	-0.0473476
	-140.55	-0.0473394
	-140.54	-0.0473377
	-140.53	-0.0473354
	-140.52	-0.0473326
	-140.51	-0.047336
	-140.5	-0.0473401
	-140.49	-0.0473438
	-140.48	-0.0473421
	-140.47	-0.0473415
	-140.46	-0.0473369
	-140.45	-0.0473307
	-140.44	-0.0473238
	-140.43	-0.0473134
	-140.42	-0.0473021
	-140.41	-0.0472892
	-140.4	-0.0472765
	-140.39	-0.0472643
	-140.38	-0.0472456
	-140.37	-0.0472297
	-140.36	-0.0472136
	-140.35	-0.0471959
	-140.34	-0.0471769
	-140.33	-0.0471564
	-140.32	-0.0471477
	-140.31	-0.0471386
	-140.3	-0.047129
	-140.29	-0.0471182
	-140.28	-0.0471074
	-140.27	-0.04709
	-140.26	-0.0470688
	-140.25	-0.0470459
	-140.24	-0.0470192
	-140.23	-0.0469897
	-140.22	-0.0469581
	-140.21	-0.0469294
	-140.2	-0.0468991
	-140.19	-0.0468667
	-140.18	-0.0468354
	-140.17	-0.0468024
	-140.16	-0.0467687
	-140.15	-0.046733
	-140.14	-0.0466957
	-140.13	-0.046668
	-140.12	-0.046639
	-140.11	-0.0466099
	-140.1	-0.0465827
	-140.09	-0.0465554
	-140.08	-0.0465243
	-140.07	-0.0464871
	-140.06	-0.0464497
	-140.05	-0.0464075
	-140.04	-0.0463636
	-140.03	-0.046321
	-140.02	-0.04629
	-140.01	-0.0462607
	-140	-0.0462353
	-139.99	-0.0462161
	-139.98	-0.0462008
	-139.97	-0.0461901
	-139.96	-0.0461824
	-139.95	-0.0461803
	-139.94	-0.0461848
	-139.93	-0.0461943
	-139.92	-0.0462109
	-139.91	-0.0462314
	-139.9	-0.0462579
	-139.89	-0.0462896
	-139.88	-0.0463215
	-139.87	-0.0463588
	-139.86	-0.046392
	-139.85	-0.0464286
	-139.84	-0.046471
	-139.83	-0.046524
	-139.82	-0.0465814
	-139.81	-0.0466441
	-139.8	-0.0467177
	-139.79	-0.046795
	-139.78	-0.0468752
	-139.77	-0.0469532
	-139.76	-0.047034
	-139.75	-0.0471145
	-139.74	-0.047195
	-139.73	-0.0472773
	-139.72	-0.0473583
	-139.71	-0.0474389
	-139.7	-0.0475182
	-139.69	-0.0475945
	-139.68	-0.0476693
	-139.67	-0.0477339
	-139.66	-0.0477977
	-139.65	-0.0478606
	-139.64	-0.0479205
	-139.63	-0.0479786
	-139.62	-0.0480355
	-139.61	-0.0481055
	-139.6	-0.0481734
	-139.59	-0.0482386
	-139.58	-0.0482999
	-139.57	-0.0483591
	-139.56	-0.0484122
	-139.55	-0.0484605
	-139.54	-0.0485076
	-139.53	-0.0485506
	-139.52	-0.0485914
	-139.51	-0.0486299
	-139.5	-0.0486663
	-139.49	-0.0487004
	-139.48	-0.0487301
	-139.47	-0.0487597
	-139.46	-0.0487886
	-139.45	-0.0488158
	-139.44	-0.0488432
	-139.43	-0.04887
	-139.42	-0.0489092
	-139.41	-0.0489468
	-139.4	-0.0489825
	-139.39	-0.0490198
	-139.38	-0.049056
	-139.37	-0.049088
	-139.36	-0.0491131
	-139.35	-0.0491382
	-139.34	-0.049158
	-139.33	-0.0491763
	-139.32	-0.0491937
	-139.31	-0.0492146
	-139.3	-0.049234
	-139.29	-0.0492522
	-139.28	-0.0492724
	-139.27	-0.0492924
	-139.26	-0.0493113
	-139.25	-0.049331
	-139.24	-0.049351
	-139.23	-0.0493733
	-139.22	-0.0493938
	-139.21	-0.0494131
	-139.2	-0.0494322
	-139.19	-0.0494501
	-139.18	-0.0494671
	-139.17	-0.0494784
	-139.16	-0.0494903
	-139.15	-0.0494936
	-139.14	-0.049495
	-139.13	-0.049496
	-139.12	-0.0494997
	-139.11	-0.0495014
	-139.1	-0.0495027
	-139.09	-0.0495102
	-139.08	-0.0495177
	-139.07	-0.0495257
	-139.06	-0.0495328
	-139.05	-0.0495408
	-139.04	-0.0495488
	-139.03	-0.0495552
	-139.02	-0.0495615
	-139.01	-0.0495687
	-139	-0.0495751
	-138.99	-0.0495819
	-138.98	-0.0495877
	-138.97	-0.0495949
	-138.96	-0.0495944
	-138.95	-0.0495938
	-138.94	-0.0495937
	-138.93	-0.049591
	-138.92	-0.0495867
	-138.91	-0.0495824
	-138.9	-0.0495937
	-138.89	-0.0496054
	-138.88	-0.0496188
	-138.87	-0.0496328
	-138.86	-0.0496479
	-138.85	-0.0496621
	-138.84	-0.0496732
	-138.83	-0.0496843
	-138.82	-0.0496931
	-138.81	-0.049701
	-138.8	-0.0497092
	-138.79	-0.0497157
	-138.78	-0.049723
	-138.77	-0.0497282
	-138.76	-0.0497327
	-138.75	-0.0497373
	-138.74	-0.0497378
	-138.73	-0.0497375
	-138.72	-0.049737
	-138.71	-0.0497508
	-138.7	-0.0497647
	-138.69	-0.0497793
	-138.68	-0.0497984
	-138.67	-0.0498181
	-138.66	-0.0498357
	-138.65	-0.0498458
	-138.64	-0.0498556
	-138.63	-0.0498599
	-138.62	-0.0498629
	-138.61	-0.0498662
	-138.6	-0.0498691
	-138.59	-0.0498724
	-138.58	-0.0498756
	-138.57	-0.04988
	-138.56	-0.0498843
	-138.55	-0.0498836
	-138.54	-0.0498839
	-138.53	-0.0498841
	-138.52	-0.0498875
	-138.51	-0.0498909
	-138.5	-0.049895
	-138.49	-0.0499045
	-138.48	-0.0499143
	-138.47	-0.0499232
	-138.46	-0.0499257
	-138.45	-0.0499279
	-138.44	-0.0499213
	-138.43	-0.0499127
	-138.42	-0.0499046
	-138.41	-0.049898
	-138.4	-0.0498913
	-138.39	-0.049885
	-138.38	-0.0498835
	-138.37	-0.0498816
	-138.36	-0.0498781
	-138.35	-0.0498752
	-138.34	-0.0498727
	-138.33	-0.0498714
	-138.32	-0.0498704
	-138.31	-0.0498705
	-138.3	-0.0498776
	-138.29	-0.0498844
	-138.28	-0.049891
	-138.27	-0.0498962
	-138.26	-0.0499012
	-138.25	-0.0498978
	-138.24	-0.0498923
	-138.23	-0.0498878
	-138.22	-0.0498812
	-138.21	-0.049874
	-138.2	-0.0498676
	-138.19	-0.0498751
	-138.18	-0.049882
	-138.17	-0.0498893
	-138.16	-0.0498972
	-138.15	-0.0499055
	-138.14	-0.0499152
	-138.13	-0.0499239
	-138.12	-0.049934
	-138.11	-0.0499453
	-138.1	-0.049956
	-138.09	-0.0499666
	-138.08	-0.0499737
	-138.07	-0.0499805
	-138.06	-0.0499841
	-138.05	-0.0499854
	-138.04	-0.0499879
	-138.03	-0.0499863
	-138.02	-0.0499848
	-138.01	-0.0499841
	-138	-0.0499974
	-137.99	-0.0500101
	-137.98	-0.0500227
	-137.97	-0.05004
	-137.96	-0.050058
	-137.95	-0.0500761
	-137.94	-0.0500889
	-137.93	-0.0501033
	-137.92	-0.0501147
	-137.91	-0.0501253
	-137.9	-0.050136
	-137.89	-0.0501424
	-137.88	-0.0501484
	-137.87	-0.0501539
	-137.86	-0.05016
	-137.85	-0.0501672
	-137.84	-0.050169
	-137.83	-0.0501735
	-137.82	-0.0501789
	-137.81	-0.0501877
	-137.8	-0.0501958
	-137.79	-0.0502037
	-137.78	-0.0502201
	-137.77	-0.050237
	-137.76	-0.0502546
	-137.75	-0.0502679
	-137.74	-0.0502827
	-137.73	-0.0502918
	-137.72	-0.050299
	-137.71	-0.0503063
	-137.7	-0.0503123
	-137.69	-0.0503173
	-137.68	-0.0503225
	-137.67	-0.0503314
	-137.66	-0.0503413
	-137.65	-0.0503503
	-137.64	-0.0503629
	-137.63	-0.0503764
	-137.62	-0.0503908
	-137.61	-0.0504044
	-137.6	-0.0504182
	-137.59	-0.050443
	-137.58	-0.0504677
	-137.57	-0.0504933
	-137.56	-0.0505195
	-137.55	-0.0505466
	-137.54	-0.0505671
	-137.53	-0.0505834
	-137.52	-0.0505998
	-137.51	-0.0506119
	-137.5	-0.050622
	-137.49	-0.0506322
	-137.48	-0.0506527
	-137.47	-0.0506734
	-137.46	-0.0506954
	-137.45	-0.0507192
	-137.44	-0.0507433
	-137.43	-0.0507683
	-137.42	-0.0507911
	-137.41	-0.0508137
	-137.4	-0.0508384
	-137.39	-0.0508621
	-137.38	-0.0508863
	-137.37	-0.0509087
	-137.36	-0.0509315
	-137.35	-0.0509514
	-137.34	-0.0509654
	-137.33	-0.0509792
	-137.32	-0.0509854
	-137.31	-0.0509897
	-137.3	-0.0509943
	-137.29	-0.0510105
	-137.28	-0.0510268
	-137.27	-0.0510437
	-137.26	-0.0510656
	-137.25	-0.0510878
	-137.24	-0.051109
	-137.23	-0.0511249
	-137.22	-0.0511409
	-137.21	-0.0511537
	-137.2	-0.0511659
	-137.19	-0.0511788
	-137.18	-0.0511878
	-137.17	-0.0511975
	-137.16	-0.0512064
	-137.15	-0.0512137
	-137.14	-0.0512213
	-137.13	-0.0512194
	-137.12	-0.0512185
	-137.11	-0.0512181
	-137.1	-0.051221
	-137.09	-0.0512247
	-137.08	-0.051229
	-137.07	-0.0512449
	-137.06	-0.0512613
	-137.05	-0.0512776
	-137.04	-0.0512894
	-137.03	-0.0513015
	-137.02	-0.0513098
	-137.01	-0.051317
	-137	-0.0513253
	-136.99	-0.0513331
	-136.98	-0.0513415
	-136.97	-0.0513499
	-136.96	-0.0513597
	-136.95	-0.0513691
	-136.94	-0.0513748
	-136.93	-0.0513835
	-136.92	-0.0513928
	-136.91	-0.051403
	-136.9	-0.0514139
	-136.89	-0.0514253
	-136.88	-0.0514526
	-136.87	-0.051479
	-136.86	-0.0515049
	-136.85	-0.0515307
	-136.84	-0.0515556
	-136.83	-0.0515748
	-136.82	-0.0515889
	-136.81	-0.0516028
	-136.8	-0.051613
	-136.79	-0.0516214
	-136.78	-0.0516288
	-136.77	-0.0516405
	-136.76	-0.0516495
	-136.75	-0.0516572
	-136.74	-0.0516649
	-136.73	-0.0516711
	-136.72	-0.0516772
	-136.71	-0.051682
	-136.7	-0.0516861
	-136.69	-0.0516943
	-136.68	-0.0516992
	-136.67	-0.0517024
	-136.66	-0.0517034
	-136.65	-0.0517022
	-136.64	-0.0516977
	-136.63	-0.051685
	-136.62	-0.0516725
	-136.61	-0.0516529
	-136.6	-0.0516307
	-136.59	-0.0516085
	-136.58	-0.0515932
	-136.57	-0.0515761
	-136.56	-0.0515588
	-136.55	-0.0515451
	-136.54	-0.0515321
	-136.53	-0.0515196
	-136.52	-0.0515055
	-136.51	-0.0514933
	-136.5	-0.0514804
	-136.49	-0.051467
	-136.48	-0.0514548
	-136.47	-0.0514404
	-136.46	-0.0514269
	-136.45	-0.0514146
	-136.44	-0.0514014
	-136.43	-0.0513912
	-136.42	-0.0513728
	-136.41	-0.0513554
	-136.4	-0.0513398
	-136.39	-0.0513258
	-136.38	-0.0513115
	-136.37	-0.0512975
	-136.36	-0.0512952
	-136.35	-0.0512943
	-136.34	-0.0512946
	-136.33	-0.051293
	-136.32	-0.0512931
	-136.31	-0.0512914
	-136.3	-0.051288
	-136.29	-0.0512842
	-136.28	-0.0512783
	-136.27	-0.0512719
	-136.26	-0.0512647
	-136.25	-0.0512572
	-136.24	-0.0512503
	-136.23	-0.051238
	-136.22	-0.0512269
	-136.21	-0.0512151
	-136.2	-0.0511997
	-136.19	-0.0511828
	-136.18	-0.0511643
	-136.17	-0.0511624
	-136.16	-0.0511602
	-136.15	-0.0511577
	-136.14	-0.0511569
	-136.13	-0.0511562
	-136.12	-0.0511513
	-136.11	-0.0511408
	-136.1	-0.0511291
	-136.09	-0.0511128
	-136.08	-0.0510951
	-136.07	-0.0510768
	-136.06	-0.05106
	-136.05	-0.0510432
	-136.04	-0.0510265
	-136.03	-0.0510112
	-136.02	-0.0509956
	-136.01	-0.0509781
	-136	-0.0509611
	-135.99	-0.0509438
	-135.98	-0.0509345
	-135.97	-0.0509254
	-135.96	-0.0509175
	-135.95	-0.050914
	-135.94	-0.0509109
	-135.93	-0.0509068
	-135.92	-0.0508951
	-135.91	-0.0508834
	-135.9	-0.0508657
	-135.89	-0.0508468
	-135.88	-0.0508291
	-135.87	-0.0508175
	-135.86	-0.0508064
	-135.85	-0.0507969
	-135.84	-0.0507918
	-135.83	-0.050787
	-135.82	-0.0507812
	-135.81	-0.0507756
	-135.8	-0.050771
	-135.79	-0.0507673
	-135.78	-0.0507637
	-135.77	-0.0507621
	-135.76	-0.0507634
	-135.75	-0.0507648
	-135.74	-0.0507667
	-135.73	-0.0507655
	-135.72	-0.0507646
	-135.71	-0.0507542
	-135.7	-0.0507422
	-135.69	-0.0507318
	-135.68	-0.0507229
	-135.67	-0.0507139
	-135.66	-0.0507065
	-135.65	-0.0507097
	-135.64	-0.0507129
	-135.63	-0.0507166
	-135.62	-0.0507186
	-135.61	-0.0507217
	-135.6	-0.0507258
	-135.59	-0.0507294
	-135.58	-0.0507352
	-135.57	-0.0507432
	-135.56	-0.0507514
	-135.55	-0.0507599
	-135.54	-0.050767
	-135.53	-0.0507747
	-135.52	-0.0507771
	-135.51	-0.0507793
	-135.5	-0.0507834
	-135.49	-0.0507854
	-135.48	-0.0507877
	-135.47	-0.0507911
	-135.46	-0.0508118
	-135.45	-0.0508326
	-135.44	-0.0508532
	-135.43	-0.0508753
	-135.42	-0.0508983
	-135.41	-0.0509198
	-135.4	-0.0509375
	-135.39	-0.0509566
	-135.38	-0.0509727
	-135.37	-0.0509884
	-135.36	-0.0510034
	-135.35	-0.0510146
	-135.34	-0.0510253
	-135.33	-0.051034
	-135.32	-0.0510421
	-135.31	-0.0510507
	-135.3	-0.0510549
	-135.29	-0.0510602
	-135.28	-0.0510652
	-135.27	-0.0510773
	-135.26	-0.0510883
	-135.25	-0.0510976
	-135.24	-0.0511111
	-135.23	-0.0511241
	-135.22	-0.0511356
	-135.21	-0.0511398
	-135.2	-0.0511444
	-135.19	-0.0511432
	-135.18	-0.0511402
	-135.17	-0.0511362
	-135.16	-0.0511317
	-135.15	-0.0511256
	-135.14	-0.0511184
	-135.13	-0.0511137
	-135.12	-0.0511089
	-135.11	-0.0511012
	-135.1	-0.051096
	-135.09	-0.0510907
	-135.08	-0.0510852
	-135.07	-0.0510786
	-135.06	-0.0510712
	-135.05	-0.0510707
	-135.04	-0.0510695
	-135.03	-0.0510686
	-135.02	-0.0510661
	-135.01	-0.0510641
	-135	-0.0510541
	-134.99	-0.0510416
	-134.98	-0.0510289
	-134.97	-0.051015
	-134.96	-0.0509994
	-134.95	-0.0509838
	-134.94	-0.0509768
	-134.93	-0.05097
	-134.92	-0.0509645
	-134.91	-0.0509603
	-134.9	-0.0509565
	-134.89	-0.0509542
	-134.88	-0.0509504
	-134.87	-0.0509466
	-134.86	-0.0509477
	-134.85	-0.050948
	-134.84	-0.0509491
	-134.83	-0.0509506
	-134.82	-0.0509526
	-134.81	-0.05095
	-134.8	-0.0509437
	-134.79	-0.0509376
	-134.78	-0.0509267
	-134.77	-0.0509135
	-134.76	-0.0509008
	-134.75	-0.0509035
	-134.74	-0.0509061
	-134.73	-0.0509101
	-134.72	-0.0509167
	-134.71	-0.0509239
	-134.7	-0.0509305
	-134.69	-0.0509326
	-134.68	-0.0509351
	-134.67	-0.0509356
	-134.66	-0.0509353
	-134.65	-0.0509359
	-134.64	-0.050933
	-134.63	-0.0509309
	-134.62	-0.0509283
	-134.61	-0.050923
	-134.6	-0.0509182
	-134.59	-0.050906
	-134.58	-0.0508936
	-134.57	-0.0508822
	-134.56	-0.0508786
	-134.55	-0.0508757
	-134.54	-0.0508739
	-134.53	-0.0508791
	-134.52	-0.0508853
	-134.51	-0.0508907
	-134.5	-0.0508891
	-134.49	-0.050888
	-134.48	-0.0508827
	-134.47	-0.0508766
	-134.46	-0.0508715
	-134.45	-0.0508655
	-134.44	-0.05086
	-134.43	-0.0508541
	-134.42	-0.0508486
	-134.41	-0.0508429
	-134.4	-0.0508307
	-134.39	-0.0508205
	-134.38	-0.0508106
	-134.37	-0.0508003
	-134.36	-0.0507904
	-134.35	-0.0507807
	-134.34	-0.0507823
	-134.33	-0.0507834
	-134.32	-0.0507836
	-134.31	-0.0507808
	-134.3	-0.0507775
	-134.29	-0.0507667
	-134.28	-0.0507529
	-134.27	-0.0507393
	-134.26	-0.0507239
	-134.25	-0.0507077
	-134.24	-0.0506907
	-134.23	-0.0506777
	-134.22	-0.0506632
	-134.21	-0.0506468
	-134.2	-0.0506312
	-134.19	-0.0506155
	-134.18	-0.0506009
	-134.17	-0.0505866
	-134.16	-0.0505725
	-134.15	-0.0505677
	-134.14	-0.0505616
	-134.13	-0.0505547
	-134.12	-0.050548
	-134.11	-0.0505405
	-134.1	-0.0505285
	-134.09	-0.0505115
	-134.08	-0.0504951
	-134.07	-0.0504744
	-134.06	-0.0504522
	-134.05	-0.0504301
	-134.04	-0.0504183
	-134.03	-0.0504049
	-134.02	-0.0503913
	-134.01	-0.0503799
	-134	-0.0503688
	-133.99	-0.0503581
	-133.98	-0.0503461
	-133.97	-0.0503351
	-133.96	-0.0503244
	-133.95	-0.0503121
	-133.94	-0.0502995
	-133.93	-0.050283
	-133.92	-0.0502658
	-133.91	-0.0502477
	-133.9	-0.0502255
	-133.89	-0.0502045
	-133.88	-0.0501755
	-133.87	-0.0501458
	-133.86	-0.0501165
	-133.85	-0.0500928
	-133.84	-0.0500675
	-133.83	-0.0500421
	-133.82	-0.0500234
	-133.81	-0.0500053
	-133.8	-0.049988
	-133.79	-0.0499668
	-133.78	-0.0499469
	-133.77	-0.0499249
	-133.76	-0.0499013
	-133.75	-0.0498775
	-133.74	-0.0498515
	-133.73	-0.0498249
	-133.72	-0.0497981
	-133.71	-0.0497715
	-133.7	-0.0497465
	-133.69	-0.0497149
	-133.68	-0.0496855
	-133.67	-0.0496567
	-133.66	-0.0496265
	-133.65	-0.0495956
	-133.64	-0.0495647
	-133.63	-0.0495486
	-133.62	-0.0495331
	-133.61	-0.049519
	-133.6	-0.0495045
	-133.59	-0.0494912
	-133.58	-0.0494741
	-133.57	-0.0494539
	-133.56	-0.0494334
	-133.55	-0.0494102
	-133.54	-0.0493863
	-133.53	-0.0493628
	-133.52	-0.0493416
	-133.51	-0.0493215
	-133.5	-0.0493009
	-133.49	-0.0492826
	-133.48	-0.0492649
	-133.47	-0.0492469
	-133.46	-0.0492289
	-133.45	-0.0492115
	-133.44	-0.0492073
	-133.43	-0.049204
	-133.42	-0.0492024
	-133.41	-0.0492051
	-133.4	-0.0492094
	-133.39	-0.0492117
	-133.38	-0.0492082
	-133.37	-0.0492056
	-133.36	-0.049199
	-133.35	-0.0491921
	-133.34	-0.0491874
	-133.33	-0.0491907
	-133.32	-0.0491961
	-133.31	-0.0492041
	-133.3	-0.0492164
	-133.29	-0.0492305
	-133.28	-0.049245
	-133.27	-0.0492608
	-133.26	-0.0492788
	-133.25	-0.0493006
	-133.24	-0.0493241
	-133.23	-0.0493508
	-133.22	-0.0493799
	-133.21	-0.0494112
	-133.2	-0.0494436
	-133.19	-0.0494719
	-133.18	-0.0495018
	-133.17	-0.0495237
	-133.16	-0.0495453
	-133.15	-0.0495693
	-133.14	-0.0495988
	-133.13	-0.0496295
	-133.12	-0.0496621
	-133.11	-0.0497022
	-133.1	-0.0497431
	-133.09	-0.0497838
	-133.08	-0.0498224
	-133.07	-0.0498619
	-133.06	-0.0499011
	-133.05	-0.0499401
	-133.04	-0.0499804
	-133.03	-0.0500216
	-133.02	-0.0500624
	-133.01	-0.0501021
	-133	-0.0501396
	-132.99	-0.0501764
	-132.98	-0.0502033
	-132.97	-0.0502295
	-132.96	-0.0502557
	-132.95	-0.0502793
	-132.94	-0.0503018
	-132.93	-0.0503237
	-132.92	-0.0503602
	-132.91	-0.0503952
	-132.9	-0.0504286
	-132.89	-0.0504603
	-132.88	-0.050491
	-132.87	-0.0505189
	-132.86	-0.0505437
	-132.85	-0.050568
	-132.84	-0.0505899
	-132.83	-0.0506103
	-132.82	-0.0506288
	-132.81	-0.0506445
	-132.8	-0.0506585
	-132.79	-0.0506686
	-132.78	-0.0506782
	-132.77	-0.0506876
	-132.76	-0.0506947
	-132.75	-0.0507019
	-132.74	-0.0507089
	-132.73	-0.0507298
	-132.72	-0.0507494
	-132.71	-0.0507679
	-132.7	-0.0507897
	-132.69	-0.050811
	-132.68	-0.0508305
	-132.67	-0.0508434
	-132.66	-0.050857
	-132.65	-0.0508664
	-132.64	-0.0508742
	-132.63	-0.0508815
	-132.62	-0.050889
	-132.61	-0.0508952
	-132.6	-0.0509009
	-132.59	-0.0509083
	-132.58	-0.0509159
	-132.57	-0.0509214
	-132.56	-0.0509282
	-132.55	-0.0509353
	-132.54	-0.0509452
	-132.53	-0.0509534
	-132.52	-0.050961
	-132.51	-0.0509716
	-132.5	-0.0509813
	-132.49	-0.0509908
	-132.48	-0.0509943
	-132.47	-0.0509983
	-132.46	-0.0509941
	-132.45	-0.050987
	-132.44	-0.0509797
	-132.43	-0.0509724
	-132.42	-0.0509629
	-132.41	-0.050953
	-132.4	-0.0509476
	-132.39	-0.0509423
	-132.38	-0.0509368
	-132.37	-0.0509313
	-132.36	-0.0509263
	-132.35	-0.0509209
	-132.34	-0.0509136
	-132.33	-0.050906
	-132.32	-0.0509019
	-132.31	-0.0508972
	-132.3	-0.0508926
	-132.29	-0.050887
	-132.28	-0.0508823
	-132.27	-0.0508694
	-132.26	-0.0508541
	-132.25	-0.0508391
	-132.24	-0.0508199
	-132.23	-0.0507991
	-132.22	-0.0507785
	-132.21	-0.050772
	-132.2	-0.0507662
	-132.19	-0.0507617
	-132.18	-0.0507584
	-132.17	-0.050756
	-132.16	-0.0507535
	-132.15	-0.0507488
	-132.14	-0.0507443
	-132.13	-0.050739
	-132.12	-0.0507337
	-132.11	-0.0507291
	-132.1	-0.050723
	-132.09	-0.0507183
	-132.08	-0.0507109
	-132.07	-0.0507019
	-132.06	-0.0506935
	-132.05	-0.0506798
	-132.04	-0.0506658
	-132.03	-0.0506521
	-132.02	-0.0506532
	-132.01	-0.0506554
	-132	-0.0506583
	-131.99	-0.0506671
	-131.98	-0.0506767
	-131.97	-0.0506851
	-131.96	-0.050687
	-131.95	-0.050689
	-131.94	-0.0506869
	-131.93	-0.0506846
	-131.92	-0.0506829
	-131.91	-0.0506796
	-131.9	-0.0506768
	-131.89	-0.0506736
	-131.88	-0.0506712
	-131.87	-0.0506684
	-131.86	-0.0506594
	-131.85	-0.0506519
	-131.84	-0.0506445
	-131.83	-0.0506412
	-131.82	-0.050638
	-131.81	-0.0506353
	-131.8	-0.0506411
	-131.79	-0.0506467
	-131.78	-0.0506519
	-131.77	-0.050651
	-131.76	-0.0506495
	-131.75	-0.0506413
	-131.74	-0.050631
	-131.73	-0.0506212
	-131.72	-0.0506118
	-131.71	-0.050602
	-131.7	-0.0505922
	-131.69	-0.0505856
	-131.68	-0.050578
	-131.67	-0.0505683
	-131.66	-0.0505601
	-131.65	-0.0505521
	-131.64	-0.0505458
	-131.63	-0.0505394
	-131.62	-0.0505339
	-131.61	-0.0505386
	-131.6	-0.050542
	-131.59	-0.0505453
	-131.58	-0.050547
	-131.57	-0.0505481
	-131.56	-0.0505418
	-131.55	-0.0505318
	-131.54	-0.0505226
	-131.53	-0.0505106
	-131.52	-0.0504972
	-131.51	-0.0504843
	-131.5	-0.0504818
	-131.49	-0.0504782
	-131.48	-0.0504752
	-131.47	-0.0504728
	-131.46	-0.0504711
	-131.45	-0.0504713
	-131.44	-0.0504708
	-131.43	-0.0504718
	-131.42	-0.0504748
	-131.41	-0.0504766
	-131.4	-0.0504783
	-131.39	-0.0504767
	-131.38	-0.0504747
	-131.37	-0.0504698
	-131.36	-0.0504603
	-131.35	-0.0504525
	-131.34	-0.0504389
	-131.33	-0.0504246
	-131.32	-0.0504112
	-131.31	-0.0504092
	-131.3	-0.0504063
	-131.29	-0.0504032
	-131.28	-0.0504043
	-131.27	-0.0504066
	-131.26	-0.0504089
	-131.25	-0.0504068
	-131.24	-0.0504062
	-131.23	-0.0504022
	-131.22	-0.050397
	-131.21	-0.0503913
	-131.2	-0.05038
	-131.19	-0.0503684
	-131.18	-0.0503556
	-131.17	-0.0503422
	-131.16	-0.05033
	-131.15	-0.0503098
	-131.14	-0.0502913
	-131.13	-0.0502731
	-131.12	-0.050257
	-131.11	-0.05024
	-131.1	-0.0502223
	-131.09	-0.0502146
	-131.08	-0.0502076
	-131.07	-0.0502009
	-131.06	-0.0501907
	-131.05	-0.0501816
	-131.04	-0.0501679
	-131.03	-0.0501523
	-131.02	-0.0501362
	-131.01	-0.050118
	-131	-0.0500995
	-130.99	-0.0500807
	-130.98	-0.0500648
	-130.97	-0.0500503
	-130.96	-0.0500335
	-130.95	-0.0500209
	-130.94	-0.0500086
	-130.93	-0.0499967
	-130.92	-0.0499846
	-130.91	-0.0499723
	-130.9	-0.049975
	-130.89	-0.0499781
	-130.88	-0.0499822
	-130.87	-0.0499882
	-130.86	-0.0499951
	-130.85	-0.0499966
	-130.84	-0.0499936
	-130.83	-0.0499899
	-130.82	-0.0499825
	-130.81	-0.0499735
	-130.8	-0.0499646
	-130.79	-0.0499635
	-130.78	-0.0499625
	-130.77	-0.0499625
	-130.76	-0.0499646
	-130.75	-0.0499662
	-130.74	-0.0499683
	-130.73	-0.0499691
	-130.72	-0.0499695
	-130.71	-0.0499745
	-130.7	-0.0499782
	-130.69	-0.0499826
	-130.68	-0.0499867
	-130.67	-0.0499904
	-130.66	-0.0499916
	-130.65	-0.049985
	-130.64	-0.0499773
	-130.63	-0.0499619
	-130.62	-0.0499435
	-130.61	-0.0499252
	-130.6	-0.049916
	-130.59	-0.0499059
	-130.58	-0.0498964
	-130.57	-0.0498905
	-130.56	-0.0498838
	-130.55	-0.049876
	-130.54	-0.0498635
	-130.53	-0.049851
	-130.52	-0.049836
	-130.51	-0.0498196
	-130.5	-0.049804
	-130.49	-0.0497848
	-130.48	-0.0497649
	-130.47	-0.0497437
	-130.46	-0.0497187
	-130.45	-0.0496929
	-130.44	-0.0496561
	-130.43	-0.049618
	-130.42	-0.0495804
	-130.41	-0.049544
	-130.4	-0.049507
	-130.39	-0.0494701
	-130.38	-0.0494435
	-130.37	-0.0494164
	-130.36	-0.0493886
	-130.35	-0.0493561
	-130.34	-0.0493237
	-130.33	-0.0492884
	-130.32	-0.0492514
	-130.31	-0.0492155
	-130.3	-0.0491779
	-130.29	-0.0491401
	-130.28	-0.0491012
	-130.27	-0.049061
	-130.26	-0.04902
	-130.25	-0.0489728
	-130.24	-0.0489262
	-130.23	-0.0488792
	-130.22	-0.0488295
	-130.21	-0.0487784
	-130.2	-0.0487256
	-130.19	-0.0486874
	-130.18	-0.0486467
	-130.17	-0.0486026
	-130.16	-0.0485571
	-130.15	-0.0485094
	-130.14	-0.0484555
	-130.13	-0.0483952
	-130.12	-0.0483333
	-130.11	-0.0482659
	-130.1	-0.0481956
	-130.09	-0.0481225
	-130.08	-0.0480489
	-130.07	-0.0479725
	-130.06	-0.0478933
	-130.05	-0.0478139
	-130.04	-0.0477333
	-130.03	-0.047651
[truncated: 28,003 more rows]

## Sheet: 2G, H
Data related to Figure 2G and H: coupling ratio (CR) and amplitude of EPSP induced with glutamate uncaging in the dendrites
	2G	2H
Distance to soma (µm)	Coupling Ratio	EPSP amplitude (mV)
45.56	0.372313	14.8759
41.55	0.42281	10.0538
36.5	0.312949	10.4451
30.75	0.39045	7.4298
21.45	0.358699	8.69481
15.4	0.424238	8.10731
10.25	0.414441	8.62455
0	0.493158	3.96804

## Sheet: 2I
Data related to Figure 2I: coupling ratio (CR) as a function of distance to the soma
Exp #	CR	Distance in µm
1	0.492063	104.25
2	0.490566	104
3	0.41791	179.5
4	0.405063	157.75
5	0.897297	67.75
6	0.6	111.75
7	0.392405	107.75
8	0.295082	220
9	0.393061	155.5
10	0.439297	192.5
11	0.0877419	191.25
12	0.64	67.5
13	0.454545	132.25
14	0.568129	102.4
15	0.455253	180.5
16	0.5	64.5
17	0.62766	82
18	0.62766	150
19	0.41	125
20	0.74	66
21	0.47	68.65
22	0.34	128
23	0.71	162
24	0.4	221
25	0.71	69.25
26	0.3	286.25
