# Supplementary material for: Analogue signaling of somatodendritic synaptic activity to axon enhances GABA release in young cerebellar molecular layer interneurons
Source: eLife. 2023 Aug 11;12:e85971. doi: 10.7554/eLife.85971 (PMC10421593; doi:10.7554/eLife.85971)
Supplement: Figure 3—source data 1. [file elife-85971-fig3-data1.xlsx]

## Sheet: 3C
Data related to figure 3C: amplitude of PSC in control vs test (somatic depolarization) conditions
Exp #	PSC amplitude*
1	1.20813
2	1.17949
3	1.68517
4	1.27
5	0.974684
6	1.12929
7	1.08485
8	1.46571
N	8
Average	1.24967
SD	0.22699
* PSC with the somatic depolarization/without the somatic depolarization
Results from the built-in Igor Pro function: StatsWilcoxonRankTest:
n	8
Tp	35
Tm	1
P_lower_tail	0.996094
P_upper_tail	0.0078125
P_two_tail	0.015625
Tp: sums of the positive ranks
Tm: sums of the negative ranks

## Sheet: 3D
Data related to Figure 3D: normalized amplitude of PSC in a train, in control and test (depolarization of somatic compartment) conditions
	Control
	Exp #1	#2	#3	#4	#5	#6	#7		N	AV	SD
Interval #1	1	1	1	1	1	1	1		7	1	0
#2	0.85	1.34216	1.1259	0.90114	1.14863	0.761075	0.83897		7	0.995411	0.212194
#3	0.72	1.13784	0.56	0.65673	0.878984	0.688887	0.911798		7	0.793463	0.195553
#4	0.7	0.610912	0.44	0.55041	0.601241	0.349603	0.699949		7	0.564588	0.130442
#5	0.71	0.678367	0.32	0.60892	0.645217	0.35598	0.480654		7	0.542734	0.157902
	Depol
	Exp #1	#2	#3	#4	#5	#6	#7
Interval #1	1	1	1	1	1	1	1		7	1	0
#2	0.5	0.720524	0.51	0.69813	0.728145	0.695093	0.562459		7	0.630622	0.102115
#3	0.34	0.968137	0.49	0.61607	0.436967	0.485625	0.304084		7	0.520126	0.22288
#4	0.44	0.613104	0.637	0.7013	0.375774	0.392648	0.401766		7	0.508799	0.136472
#5	0.4	0.503863	0.31	0.4766	0.556278	0.423969	0.321973		7	0.427526	0.0917758
Results from the built-in Igor Pro function: StatsWilcoxonRankTest:
1st interval control vs 1st interval test
n	7
Tp	28
Tm	0
P_lower_tail	1
P_upper_tail	0.0078125
P_two_tail	0.015625
2nd interval control vs 2nd interval test
n	7
Tp	28
Tm	0
P_lower_tail	1
P_upper_tail	0.0078125
P_two_tail	0.015625
3rd interval control vs 3rd interval test
n	7
Tp	18
Tm	10
P_lower_tail	0.765625
P_upper_tail	0.289062
P_two_tail	0.578125
4rth interval control vs 4rth interval test
n	7
Tp	26
Tm	2
P_lower_tail	0.984375
P_upper_tail	0.0234375
P_two_tail	0.046875

## Sheet: 3G
Data related to Figure 3G: axonal Cell-attached spike width and amplitude in control and test (somatic depolarization) conditions
Exp #	Axonal AP Half-width	Exp #	Axonal AP amplitude
1	1	1	0.873889
2	0.95	2	0.935011
3	1.09524	3	0.919245
4	1	4	0.850501
5	1.02817	5	0.902009
6	0.779661	6	0.915053
7	1.07407	7	0.963524
8	0.916667	8	0.874898
9	0.955556	9	0.901006
10	1	10	0.952839
11	0.95082	11	0.977094
12	1.13333	12	1.0066
N	12	N	12
Average	0.990293	Average	0.922639
SD	0.0926304	SD	0.0462933
* Amplitude ratio of the axCA-spike with/without the preAP depolarization
Results from the built-in Igor Pro function: StatsWilcoxonRankTest:
Axonal CA-spike half-width		Axonal CA-spike amplitude
n	12	n	12
Tp	33	Tp	1
Tm	45	Tm	77
P_lower_tail	0.423828	P_lower_tail	0.000488281
P_upper_tail	0.605469	P_upper_tail	0.999756
P_two_tail	0.847656	P_two_tail	0.000976562
Tp: sums of the positive ranks
Tm: sums of the negative ranks
