# Supplementary material for: Analogue signaling of somatodendritic synaptic activity to axon enhances GABA release in young cerebellar molecular layer interneurons
Source: eLife. 2023 Aug 11;12:e85971. doi: 10.7554/eLife.85971 (PMC10421593; doi:10.7554/eLife.85971)
Supplement: Figure 4—source data 1. [file elife-85971-fig4-data1.xlsx]

## Sheet: 4B
Data related to Figure 4B: firing frequency as a function of stimulus intentity
	Injected Current (pA)	Maximal Instantaneous Firing Frequency (Hz)
	67	20.1532
	77	65.4022
	87	77.3994
	97	80.9717
	107	105.82
	117	105.82
	127	157
	137	124
	147	153
	157	153
	167	166
	177	170
	187	192
	197	203
	207	213
	217	224
	227	238
	237	252
	247	244
	257	266
	267	264
	277	271
	287	278
	297	286
	307	279
	317	289
	327	306
	337	310
	347	320
	357	327
	367	316
	377	334
	387	343
	397	346
	407	350

## Sheet: 4C
Data related to Figure 4C: raster plots for the somatic and bouton spikes
	Sweep #	Timing of somatic APs	Timing of bouton CA-spikes
	4	115	115.08
	5	49.34	49.46
	5	105.18	105.27
	5	154.8	154.94
	6	43.89	43.94
	6	64.27	64.33
	6	79.56	79.69
	6	95.2	95.25
	6	144.6	144.7
	7	42.41	42.53
	7	59.64	59.75
	7	74.33	74.47
	7	87.25	87.3
	7	103.19	103.28
	8	39.48	39.55
	8	53.17	53.25
	8	66.87	67
	8	79.22	79.24
	8	93.94	94.01
	8	130.5	130.66
	8	181.96	182.12
	8	228.36	228.44
	9	37.92	38.01
	9	49.58	49.7
	9	59.48	59.56
	9	70.02	70.08
	9	79.47	79.59
	9	89.76	89.8
	9	105.91	105.96
	9	116.41	116.53
	10	37.62	37.77
	10	48.11	48.19
	10	57.77	57.86
	10	68.29	68.34
	10	78.03	78.11
	10	90.61	90.71
	10	100.06	100.13
	10	109.65	109.73
	11	36.6	36.67
	11	42.97	43.06
	11	51.51	51.57
	11	60.53	60.64
	11	69.54	69.64
	11	77.4	77.51
	11	86.36	86.47
	11	94.52	94.61
	11	107.31	107.4
	12	35.91	36.01
	12	44.67	44.75
	12	53.12	53.2
	12	61.15	61.25
	12	70.37	70.45
	12	79.2	79.33
	12	89.26	89.31
	12	97.86	98.02
	12	217.65	217.78
	13	35.13	35.24
	13	41.92	42.04
	13	49.35	49.46
	13	56.13	56.19
	13	62.68	62.75
	13	75.06	75.15
	13	83.29	83.39
	13	90.88	91.04
	13	102.19	102.31
	13	110.45	110.49
	13	144.45	144.54
	13	164.7	164.9
	14	35.09	35.21
	14	41.62	41.7
	14	49.64	49.73
	14	56.85	56.95
	14	64.03	64.15
	14	73.43	73.51
	14	82.82	82.94
	14	93.28	93.43
	14	103.49	103.53
	14	112.56	112.68
	14	121.08	121.19
	14	128.67	128.72
	14	140.64	140.74
	14	149.85	149.92
	14	158.04	158.11
	15	34.64	34.75
	15	40.65	40.78
	15	47.47	47.58
	15	54.32	54.42
	15	61.02	61.09
	15	67.08	67.18
	15	76.07	76.18
	15	84.67	84.77
	15	179.66	179.83
	16	34.41	34.5
	16	40.51	40.58
	16	46.71	46.79
	16	52.44	52.53
	16	59.35	59.5
	16	65.65	65.78
	16	71.43	71.54
	16	79.11	79.17
	16	86	86.04
	16	92.64	92.78
	16	100.67	100.85
	16	108.62	108.68
	16	116.74	116.84
	16	123.79	123.88
	17	33.96	34.06
	17	39.16	39.32
	17	45.01	45.12
	17	51.06	51.17
	17	56.77	56.84
	17	62.45	62.55
	17	68.44	68.62
	17	76.43	76.54
	17	84.2	84.24
	17	93.82	94.01
	17	103.03	103.15
	17	110.18	110.28
	17	116.19	116.28
	18	33.82	33.95
	18	38.97	39.06
	18	43.97	44.1
	18	49.18	49.28
	18	54.67	54.81
	18	60.02	60.13
	18	64.94	65.09
	18	71.94	72.1
	18	77.74	77.9
	18	83.7	83.85
	19	33.74	33.88
	19	38.43	38.58
	19	43.4	43.54
	19	48.66	48.78
	19	53.98	54.1
	19	59.42	59.6
	19	64.74	64.9
	19	70.69	70.89
	19	75.89	75.96
	20	33.38	33.5
	20	37.84	37.98
	20	42.39	42.55
	20	47.24	47.37
	20	52.28	52.49
	20	57.24	57.36
	20	61.93	62.11
	20	67.34	67.45
	20	72.58	72.74
	20	78.14	78.34
	20	83.18	83.25
	20	89.26	89.34
	20	94.27	94.44
	21	33.22	33.37
	21	37.62	37.73
	21	41.82	42
	21	46.41	46.51
	21	51.02	51.17
	21	55.72	55.85
	21	60.45	60.6
	21	65.51	65.7
	21	70.62	70.77
	21	75.51	75.68
	21	80.64	80.83
	21	85.91	86.02
	21	91.65	91.82
	21	97.26	97.43
	21	103.52	103.69
	21	110.04	110.27
	22	33.03	33.16
	22	37	37.14
	22	41.23	41.36
	22	45.54	45.7
	22	50.09	50.24
	22	54.5	54.62
	22	58.86	59.09
	22	63.28	63.48
	22	68.24	68.46
	22	73.17	73.31
	22	78.79	78.97
	22	83.89	84.11
	22	89.15	89.36
	22	95.2	95.42
	22	101.22	101.42
	22	106.75	106.88
	22	112.46	112.74
	22	120.25	120.41
	22	126.16	126.36
	22	131.39	131.62
	22	137.89	138.06
	22	143.53	143.64
	22	149.48	149.79
	22	156.59	156.78
	23	32.98	33.12
	23	37.09	37.27
	23	41.18	41.34
	23	45.46	45.6
	23	49.76	49.95
	23	54.3	54.47
	23	58.76	58.92
	23	63.98	64.13
	23	68.91	69.12
	23	73.57	73.72
	23	78.02	78.23
	23	82.58	82.79
	23	88.97	89.1
	23	93.86	94.05
	24	33.04	33.16
	24	36.8	36.97
	24	40.83	40.96
	24	44.77	44.93
	24	48.91	49.11
	24	53.35	53.5
	24	57.87	58
	24	62.25	62.46
	24	67.76	67.92
	24	72.57	72.76
	24	77.4	77.67
	24	82.29	82.53
	24	87.59	87.79
	24	92.78	93.01
	24	98.48	98.66
	24	103.58	103.85
	24	108.36	108.59
	24	114.04	114.26
	24	119.53	119.7
	24	125.2	125.46
	24	130.26	130.58
	25	32.75	32.91
	25	36.54	36.74
	25	40.66	40.8
	25	44.69	44.89
	25	48.84	49.04
	25	53.12	53.3
	25	57.54	57.74
	25	61.89	62.04
	25	66.28	66.54
	25	70.81	70.93
	25	74.82	75.05
	25	80.13	80.31
	25	85.55	85.8
	25	90.89	91.11
	25	96.01	96.16
	25	101.47	101.75
	26	32.74	32.91
	26	36.54	36.66
	26	40.23	40.39
	26	44.18	44.35
	26	48.42	48.59
	26	52.49	52.66
	26	56.61	56.8
	26	60.59	60.73
	26	65.38	65.54
	26	69.74	70
	26	74.19	74.42
	26	78.2	78.44
	26	83.09	83.3
	26	88.36	88.61
	26	93.22	93.38
	26	97.95	98.18
	26	102.57	102.82
	26	106.41	106.75
	26	112.67	112.87
	27	32.46	32.65
	27	36.11	36.25
	27	39.7	39.9
	27	43.55	43.73
	27	47.43	47.6
	27	51.57	51.78
	27	55.45	55.69
	27	60.13	60.33
	27	64.96	65.16
	27	69.24	69.48
	27	73.48	73.76
	27	78.01	78.28
	27	82.6	82.86
	27	88.5	88.79
	28	32.48	32.66
	28	35.98	36.2
	28	39.68	39.85
	28	43.38	43.55
	28	47.09	47.26
	28	50.96	51.12
	28	54.71	54.93
	28	58.82	59.03
	28	62.79	63.03
	28	66.56	66.84
	28	70.87	71.14
	28	74.99	75.31
	28	80.42	80.69
	28	85.12	85.4
	28	89.57	89.77
	28	94.06	94.32
	28	98.09	98.35
	28	102.83	103.08
	28	108	108.31
	28	113.2	113.47
	28	117.82	118.09
	29	32.44	32.59
	29	36.02	36.15
	29	39.69	39.84
	29	43.34	43.49
	29	47.03	47.2
	29	50.77	50.98
	29	54.51	54.8
	29	58.64	58.83
	29	62.95	63.16
	29	67.31	67.58
	29	71.6	71.86
	29	75.75	75.98
	29	79.63	79.89
	29	83.92	84.13
	29	88.37	88.62
	29	93.37	93.69
	29	98.47	98.74
	29	102.71	103.05
	30	32.36	32.51
	30	35.93	36.09
	30	39.39	39.61
	30	42.93	43.1
	30	46.56	46.78
	30	50.17	50.39
	30	54.01	54.23
	30	57.78	58.05
	30	61.52	61.76
	30	65.53	65.85
	30	69.68	69.92
	30	73.73	73.98
	30	77.93	78.25
	30	81.85	82.16
	30	86.3	86.58
	31	32.23	32.43
	31	35.5	35.71
	31	38.86	39
	31	42.38	42.57
	31	45.9	46.16
	31	49.51	49.72
	31	53.14	53.36
	31	56.91	57.14
	31	60.46	60.72
	31	64.53	64.81
	31	68.47	68.74
	31	72.42	72.73
	31	76.32	76.6
	31	80.64	80.94
	31	85.26	85.45
	31	89.65	89.93
	31	93.52	93.84
	31	97.68	97.95
	31	102.02	102.37
	31	106.54	106.8
	31	110.5	110.81
	31	115.01	115.34
	31	119.36	119.76
	31	123.93	124.23
	31	128.26	128.53
	31	132.41	132.83
	31	137.16	137.45
	31	141.71	142.07
	32	32.26	32.41
	32	35.49	35.69
	32	38.92	39.13
	32	42.47	42.66
	32	45.8	46.08
	32	49.35	49.58
	32	52.93	53.17
	32	56.56	56.78
	32	60.38	60.64
	32	64.34	64.61
	32	68.41	68.75
	32	72.53	72.82
	32	76.45	76.74
	32	80.46	80.75
	32	84.99	85.31
	32	89.1	89.4
	32	93.72	94.06
	32	97.94	98.24
	32	102.11	102.45
	32	106.26	106.61
	32	110.55	110.97
	33	32.13	32.29
	33	35.42	35.58
	33	38.54	38.75
	33	41.71	41.96
	33	45.17	45.42
	33	48.54	48.81
	33	52.29	52.57
	33	56.09	56.38
	33	60.06	60.3
	33	63.77	64.07
	33	67.61	67.89
	33	71.45	71.69
	33	75.05	75.33
	33	79.23	79.46
	33	83.36	83.67
	33	87.36	87.62
	33	91.65	91.92
	33	95.48	95.78
	33	99.22	99.49
	33	103.27	103.6
	33	107.38	107.71
	34	32.05	32.22
	34	35.11	35.36
	34	38.53	38.71
	34	41.8	42
	34	44.92	45.19
	34	48.33	48.55
	34	51.9	52.09
	34	55.36	55.62
	34	58.67	58.97
	34	62.3	62.6
	34	65.8	66.1
	34	69.41	69.69
	34	73.12	73.44
	34	76.92	77.3
	34	80.86	81.19
	35	31.99	32.14
	35	35.17	35.37
	35	38.33	38.58
	35	41.64	41.83
	35	44.91	45.16
	35	48.39	48.63
	35	51.96	52.26
	35	55.53	55.77
	35	59.19	59.48
	35	62.96	63.25
	35	66.68	66.91
	35	70.39	70.69
	35	74.09	74.33
	36	32	32.19
	36	34.99	35.16
	36	38.13	38.33
	36	41.45	41.68
	36	44.75	44.99
	36	48.3	48.56
	36	51.69	52.02
	36	55.28	55.54
	36	58.74	59.05
	36	62.6	62.9
	36	66.59	66.94
	36	70.15	70.46
	36	73.92	74.2
	36	77.45	77.82
	36	80.91	81.3
	36	85.34	85.69
	36	89.39	89.71
	36	93.29	93.58
	36	96.96	97.26
	36	100.67	101.06
	36	104.24	104.65
	36	108.402	108.8
	36	111.93	112.35
	36	115.69	116.03
	36	119.89	120.2
	37	31.96	32.13
	37	34.87	35.11
	37	38.02	38.26
	37	41.18	41.4
	37	44.45	44.72
	37	47.77	48.03
	37	51.22	51.46
	37	54.53	54.86
	37	58.18	58.5
	37	61.91	62.19
	37	65.38	65.71
	37	68.96	69.27
	37	72.63	72.96
	37	76.15	76.54
	37	79.96	80.25
	37	83.64	83.95
	37	87.69	88.09
	37	91.8	92.13
	38	31.88	32.06
	38	34.77	34.99
	38	37.79	37.99
	38	40.82	41.02
	38	43.99	44.21
	38	47.35	47.6
	38	50.61	50.91
	38	54.01	54.26
	38	57.45	57.76
	38	61.1	61.43
	38	64.82	65.1
	38	68.32	68.68
	38	71.86	72.21
	38	75.44	75.77
	39	31.83	32.04
	39	34.75	34.96
	39	37.61	37.89
	39	40.63	40.92
	39	43.77	44.05
	39	46.95	47.24
	39	50.01	50.37
	39	53.34	53.67
	39	56.64	56.94
	39	60.28	60.56
	39	63.74	64.11
	39	67.41	67.7
	39	71.15	71.45
	39	74.65	74.93
	39	78	78.36
	39	81.33	81.64
	39	84.75	85.12
	39	88.51	88.9
	39	92.47	92.95
	39	96.52	96.98

## Sheet: 4D, E
Data related to figure 4D and E: axonal cell-attached spikes amplitude and half-width as a function of instantaneous firing frequency of the cell
Norm AP half width	Norm AP amplitude	Instantaneous frequency
1	1	6.66667
1	0.999999	6.66667		Results from the built-in Igor Pro function: StatsRankCorrelationTest:
0.769231	0.96244	17.9083		Axonal CA-spike Half-width
0.807692	1.00939	20.1532		n	504
1	1	6.66667		sumDi2	22026200
1.04762	1.15445	49.0677		sumTx	33957.5
0.952381	1.13089	65.4022		sumTy	3601.5
1.19048	1.09948	63.9386		SpearmanR	-0.0341099
1	1.17539	20.2429		Critical	0.0874023
1	1	6.66667
1.04762	1.10162	58.0383
1.04762	0.986145	68.0735		Axonal CA-spike amplitude
0.952381	0.995383	77.3994		n	504
1.04762	1.04157	62.7353		sumDi2	27196600
1	1	6.66667		sumTx	12.5
1.14286	0.984548	73.046		sumTy	3601.5
0.904762	1.00883	72.9927		SpearmanR	-0.274821
1.09524	0.902871	80.9717		Critical	0.0874023
1.38095	0.905078	67.9348
1.14286	0.958058	27.3523
1.04762	1.00221	19.4326		sumDi2: sum of the squared ranks
1.14286	0.964681	21.5517		sumTx and sumTy: sums of the ties coefficients
1	1	6.66667
1.04762	0.957648	85.7633
1.14286	1.16471	101.01
1.09524	0.915295	94.8767
1.14286	1.07059	105.82
1	0.990589	97.1817
1	1.04	61.9195
1	1.07059	95.2381
1	1	6.66667
0.916667	0.995663	95.3289
1.04167	0.939264	103.52
0.958333	1.03037	95.057
0.958333	0.945771	102.669
0.958333	1.03471	79.4912
1.04167	0.937095	105.82
1.125	1.01085	104.275
1	1	6.66667
1.04167	0.982907	156.986
0.916667	0.963676	117.096
1	1.01282	110.865
1	1.00427	110.988
1.04167	0.944445	127.226
1.16667	0.982907	111.607
0.958333	0.914531	122.549
0.958333	0.976496	78.1861
1.13636	1	6.66667
1.04545	0.962343	114.155
1.09091	0.941423	118.343
0.954545	1	124.533
1.04545	0.953975	108.46
0.954545	0.956067	113.25
0.909091	0.884937	99.4035
1.22727	0.945607	116.279
1	0.953975	8.34794
1	1	6.66667
1.04762	1.01068	147.275
1.09524	0.991454	134.59
1.04762	0.863248	147.493
1.14286	0.869659	152.672
1.19048	0.959402	80.7755
1.04762	1.0406	121.507
1.19048	0.888889	131.752
1.09524	0.989317	88.4173
1.47619	0.878206	121.065
1.14286	0.929488	29.4118
1.28571	0.99359	49.3827
1	1	6.66667
0.954545	1.00652	153.139
1.18182	1.01087	124.688
1.04545	1.02391	138.696
1.13636	1.07174	139.276
1.13636	1	106.383
1	1.02609	106.496
1	1.08261	95.6023
1.13636	0.926087	97.9432
1.09091	1.06304	110.254
1.09091	1.01087	117.371
1.13636	0.96087	131.752
1.27273	0.982609	83.5422
0.954545	0.919565	108.578
1.04545	0.993478	122.1
1	1	6.66667
0.96	0.997849	166.389
0.92	0.836559	146.628
0.92	1.0172	145.985
0.8	1.03011	149.254
0.92	0.905376	165.016
1.12	1.03441	111.235
0.92	0.91828	116.279
0.92	1.04731	10.5274
1	1	6.66667
0.846154	0.976087	163.934
1.03846	0.986957	161.29
1	0.980435	174.52
1.23077	1.04565	144.718
1.34615	0.930435	158.73
0.961538	1.01739	173.01
1	0.986957	130.208
0.769231	1.1087	145.138
0.884615	0.978261	150.602
0.884615	0.95	124.533
0.923077	0.980435	125.786
0.846154	0.980435	123.153
1.15385	1.05652	141.844
1	1	6.66667
1	0.88889	192.308
1.04167	0.904763	170.94
0.958333	0.902779	165.289
0.916667	0.861112	175.131
0.916667	0.932541	176.056
0.958333	0.835318	166.945
1	0.914684	125.156
1	0.88889	128.7
1	0.882937	103.95
0.958333	0.880953	108.578
1	0.904763	139.86
1	0.936509	166.389
1	1	6.66667
1.125	1	194.175
1	0.971923	200
1	0.958964	191.939
1	1.01728	182.149
0.958333	0.961124	186.916
1	0.926566	203.252
1.20833	1.04968	142.857
1.08333	1.00864	172.414
1	1.04536	167.785
1	1	6.66667
0.958333	1.01691	213.22
0.875	1.00634	201.207
1.125	0.881607	190.114
1.125	1.09937	187.97
1.20833	0.900635	183.824
1	0.88795	187.97
0.916667	0.932347	168.067
1.04167	1.00846	192.308
1	1	6.66667
1.31579	0.956333	224.215
1.42105	1.0393	219.78
1.15789	1.04804	206.185
1.10526	1.0524	198.413
1.31579	0.9738	201.613
1.31579	0.951966	213.22
1.21053	1.07205	184.843
1.21053	1.0262	190.839
1.10526	0.910481	179.856
1.21053	0.978167	198.413
1.31579	1.00655	164.474
1.31579	0.9869	199.601
1	1	6.66667
0.96	1.00823	227.273
1	0.958849	238.095
1.08	0.973252	217.865
0.84	0.997943	216.92
0.8	0.938272	212.766
0.88	1.00206	211.416
0.88	0.995886	197.628
0.96	0.971194	195.695
0.88	0.923869	204.499
0.96	0.890947	194.932
0.92	0.919754	189.753
1.04	0.94856	174.216
0.96	0.882717	178.253
1	0.952676	159.744
0.88	0.997943	153.374
1	1	6.66667
1.08696	1.09195	251.889
1.08696	1.0092	236.407
0.956522	1.06897	232.019
1.08696	1.08046	219.78
1	1.05287	226.757
0.956522	1.05977	229.358
1.34783	1.0092	226.244
1	0.967817	201.613
0.956522	1.05058	202.84
1.08696	1.01609	177.936
0.956522	1.05747	196.079
1.17391	0.990805	190.114
1	1.0023	165.289
1.08696	0.914943	166.113
0.956522	0.935633	180.832
0.956522	1.07816	175.131
1	1.0115	128.37
1.08696	1.06897	169.205
1.08696	1.03448	191.205
1.13043	0.972414	153.846
1.3913	0.983909	177.305
1.04348	0.965518	168.067
1.17391	1.06897	140.647
1	1	6.66667
0.958333	0.887816	243.309
0.875	0.909092	244.499
1.16667	0.860736	233.645
1	0.930369	232.558
1.20833	0.897487	220.264
1	0.833657	224.215
1.04167	0.974856	191.571
1.29167	0.905224	202.84
0.916667	0.868473	214.592
1.08333	0.891684	224.719
1	0.885881	219.298
1.45833	0.868473	156.495
1.04167	0.907158	204.499
1	1	6.66667
1.08696	0.881049	265.958
0.956522	0.923388	248.139
1.08696	0.822581	253.807
1	0.86492	241.546
1.04348	0.856855	225.225
1.30435	0.965726	221.239
1.13043	0.887097	228.31
1.04348	0.977823	181.488
1	0.935484	207.9
1.08696	0.875	207.039
1.17391	0.86492	204.499
1	0.860888	188.679
1.04348	0.935484	192.678
1.04348	0.921372	175.438
1.26087	0.903226	196.079
1.34783	0.899194	209.205
1	0.905242	176.056
1.21739	0.89113	182.149
1.26087	0.991936	176.367
1.17391	0.987904	197.629
0.923077	0.999998	6.66667
0.923077	0.886075	263.852
0.923077	0.913501	242.719
0.923077	0.921939	248.139
1.03846	0.894513	240.964
1.03846	0.871307	233.645
1.07692	0.945146	226.244
1.07692	0.972572	229.885
0.923077	0.938817	227.79
0.961538	0.91772	220.751
1.30769	0.896623	249.376
0.846154	0.940927	188.324
1	0.966243	184.502
1.03846	0.951475	187.266
1	0.873416	195.312
1	0.98523	183.15
1	1	6.66667
1	0.943478	263.158
1.36364	1.00435	271.003
1.09091	0.997826	253.165
1.18182	0.913044	235.849
1.04545	1.03913	245.7
1.40909	0.967391	242.719
1.13636	0.991304	251.256
1.13636	0.952174	208.768
1.09091	0.943478	229.358
1	0.917391	224.719
1.27273	1.00435	249.377
1.18182	0.893478	204.499
1.36364	0.932609	189.753
1.09091	0.982609	205.761
1.27273	1.01087	211.417
1.18182	0.982609	216.45
1.09091	0.991304	260.417
1.18182	1.03478	159.744
1	1	6.66667
0.862069	1.05034	273.972
0.896552	0.97254	278.552
0.965517	1.08467	259.74
0.862069	1.00229	257.732
0.758621	1.04805	241.546
0.758621	1.01144	257.732
0.862069	0.979405	213.675
0.896552	0.970252	207.039
0.862069	1.01144	233.645
0.827586	0.997712	235.849
0.896552	1.02517	220.751
0.965517	1.02288	217.865
0.862069	1.0778	169.491
1	1	6.66667
0.961538	0.96009	285.714
1.03846	1.01331	270.27
1.34615	0.951221	270.27
1	0.791576	269.542
0.884615	1.07982	258.398
0.923077	0.997784	266.667
1.03846	0.991132	243.309
1.07692	1.03991	251.889
1.07692	0.873616	265.252
0.923077	0.944569	232.018
1.03846	0.977829	242.719
1.23077	1.04878	184.162
1.07692	0.997784	212.766
1.07692	0.909092	224.719
0.923077	0.944569	222.717
1.15385	0.982263	248.139
0.923077	0.931265	210.97
1.23077	0.957873	193.424
0.923077	0.975611	192.308
0.923077	1.03548	216.45
1	1	6.66667
1.08333	0.987315	279.33
1.25	0.94926	272.48
1.08333	0.87315	273.973
1.29167	0.955603	271.003
1.125	0.885836	267.38
1.08333	0.968288	267.38
1	0.86258	242.131
1	0.942918	232.018
1.25	0.972516	229.358
0.958333	0.985201	233.1
1.04167	0.985201	240.964
1.125	0.917548	257.732
1.41667	0.953489	233.1
1.08333	1.00423	224.719
1.125	0.955603	200
1.125	0.961945	196.079
1.16667	1.03171	235.849
1	1	6.66667
1.19231	0.936476	280.112
1.03846	0.852459	289.017
0.961538	0.860656	282.486
1.11538	0.891394	275.482
0.923077	0.862705	277.009
1	0.928279	260.417
1	0.938525	265.252
0.961538	0.893443	267.38
1.11538	0.961066	249.377
1	0.842213	240.964
1.03846	0.889344	246.913
1.11538	0.891393	238.095
0.923077	0.909836	255.102
1.15385	0.713115	224.719
1	1	6.66667
1.07143	0.988687	305.81
1	1.00679	297.619
1.14286	0.972851	284.091
0.892857	0.954751	284.091
1.14286	0.936651	277.009
1.10714	0.943439	275.482
0.928571	0.927602	265.252
1.07143	1.00452	281.69
0.75	0.961538	245.7
0.964286	1.00452	253.807
0.785714	1.05204	253.165
1	0.963801	256.41
1	1.00679	231.482
0.928571	0.961538	216.45
1.10714	0.988688	227.79
1.03571	0.914027	258.398
0.964286	0.995475	240.384
1.03571	1.05204	230.415
1.07143	1.00452	221.239
0.821429	1.04072	252.525
0.928571	0.954751	221.729
0.785714	0.957013	229.885
1.07143	0.9819	218.818
0.928571	0.979638	230.947
0.785714	0.975113	240.963
0.857143	1.00905	210.526
1.21429	1.02715	219.78
1	1	6.66667
0.92	0.926005	309.597
1	0.966174	291.546
1.04	0.900635	281.69
1.16	0.92389	300.3
0.88	0.875265	281.69
1.08	0.91332	279.329
0.96	0.93869	275.482
1.08	0.871036	261.78
1.08	1.06131	252.526
0.96	0.896406	245.7
1.2	0.928119	242.719
1.16	0.917548	255.102
1.04	0.957717	249.376
1	0.91332	220.751
0.96	0.923891	243.309
1.32	0.921776	216.45
1.28	0.934461	236.967
1.12	0.928119	239.808
1.12	0.936576	240.964
0.96	0.858351	233.1
1	1	6.66667
1.29167	1.01996	303.952
1.33333	1.00222	320.513
1	0.982263	315.458
1.29167	1.01331	289.017
1.16667	1.00222	296.736
1.33333	0.909092	266.667
0.958333	1	263.158
1	0.882485	251.889
1.16667	0.882485	269.542
1.20833	0.873616	260.417
1.125	0.964525	260.417
1.29167	0.895789	277.777
1.33333	1.00887	239.234
1.41667	1.08426	242.131
1.16667	0.929048	250
1.16667	0.96009	233.1
1.5	0.942352	261.097
1.125	0.91131	267.38
1.70833	0.951221	246.914
1.45833	0.851443	243.309
1	1	6.66667
0.884615	1.03464	326.797
1.03846	1.02079	292.398
1.34615	0.937646	305.81
1.03846	0.914551	320.513
1	0.972288	293.255
0.923077	1.02079	280.112
1.07692	1.04157	289.017
0.884615	0.91917	302.115
1.11538	1.03233	275.482
1.07692	1.01155	285.714
0.961538	1.01617	277.008
1.15385	1.08776	269.542
1.11538	0.937646	263.158
1.03846	0.981526	253.807
1	1	6.66667
1	1.00224	314.466
0.862069	1.02908	316.455
0.931035	1.01119	302.115
1	1.00447	305.81
0.931035	1.00895	287.356
0.965517	1.01119	280.112
1.10345	1.01342	280.112
0.827586	0.986577	273.224
0.862069	1.0179	265.252
0.931035	0.914989	268.817
1	0.879194	269.542
0.931035	1	270.27
1	1	6.66667
1.16	0.924337	334.448
1	0.879347	318.471
1.36	0.934562	301.205
1.12	0.987731	303.03
1.08	0.865032	281.69
1.16	0.846627	294.985
1.08	0.854807	278.552
1.36	0.905932	289.017
0.96	0.934562	259.068
1.16	0.914112	250.627
1	0.926382	280.898
1.6	0.824132	265.252
1.08	0.899797	283.286
0.92	0.932517	289.017
1.4	0.862987	225.734
0.96	0.871167	246.913
1.04	0.862987	256.41
0.88	0.963192	272.48
1.04	0.901842	269.542
1.2	0.950922	280.112
1.2	0.918202	240.262
1.04	0.965237	283.457
1	0.840492	265.957
1.28	0.871167	238.095
1	0.999999	6.66667
0.928571	0.999999	343.643
1.10714	0.948774	317.46
0.892857	0.890868	316.456
1.14286	0.948774	305.81
1.14286	0.995545	301.205
0.821429	0.906458	289.855
0.928571	0.977727	302.115
0.928571	0.922048	273.973
0.964286	0.966591	268.097
1.07143	0.937638	288.185
1.21429	0.919821	279.329
0.964286	0.986636	272.48
0.857143	0.94432	284.091
0.964286	0.930957	262.467
1.03571	0.966591	271.739
0.928571	0.946547	246.913
1.14286	0.962137	243.309
1	0.999999	6.66667
0.9	0.947711	346.021
1.03333	0.943354	331.126
0.966667	0.921567	330.033
0.7	0.956426	315.457
0.8	0.938997	297.619
0.866667	0.938997	306.748
0.833333	0.875816	294.118
0.9	0.915032	290.697
0.966667	1.08714	273.973
0.866667	0.94989	268.817
0.966667	0.999999	285.714
0.933333	0.973855	282.486
1.2	0.90196	279.33
1	0.999999	6.66667
0.935484	0.906182	342.466
1.06452	0.918975	349.65
1.12903	0.97228	331.126
0.741935	0.867803	318.471
0.870968	0.948826	314.465
1.22581	0.897653	326.798
0.870968	0.936033	300.3
1.06452	0.92324	303.03
0.83871	0.946694	274.725
0.870968	0.893389	289.017
0.903226	0.955223	272.479
0.903226	0.936033	267.38
1	0.929636	285.714
0.806452	0.921107	298.508
0.967742	0.863538	300.3
0.903226	0.961619	292.398
0.967742	0.936033	265.957
0.774194	0.90405	252.525
0.903226	0.933901	246.914

## Sheet: 4G, H
Data related to Figures 4G, H: Half-width and amplitude of axonal cell-attached and somatic spikes as a function of the interval between paired pulses
Interval (ms)	Average of ax CA-spike half-width ratio	SD of ax CA-spike half-width ratio	Average of ax CA-spike amplitude ratio	SD of ax CA-spike amplitude ratio	Average of somatic AP amplitude ratio	SD of somatic AP amplitude ratio
1.4	0.889688	0.191066	1.01196	0.086202	0.419044	0.143422
1.6	0.984405	0.0682533	0.859956	0.0866151	0.600198	0.1898
1.8	1.16423	0.135625	0.969728	0.0525306	0.636132	0.168067
2	1.12126	0.128728	0.935536	0.149851	0.788263	0.0952322
2.2	1.12777	0.24541	0.998878	0.0688241	0.811832	0.0967533
2.4	1.03192	0.0960596	0.981182	0.0656673	0.827378	0.0939984
2.6	1.03975	0.220091	0.943921	0.0586022	0.8684	0.0748849
2.8	1.12562	0.223366	1.01895	0.115992	0.891684	0.0740862
3	0.979351	0.164604	1.00219	0.0676994	0.904067	0.0730944
3.2	1.03489	0.146139	0.960097	0.0735869	0.926022	0.0600743
3.4	1.09973	0.225725	1.01892	0.0639951	0.934542	0.0615684
3.6	1.13389	0.120872	1.04981	0.0630593	0.941148	0.059242
3.8	1.10345	0.22195	1.04096	0.0791726	0.952551	0.0582885
4	1.02956	0.165633	1.00651	0.0866145	0.956048	0.0558744
4.2	1.05224	0.114096	0.99327	0.0686961	0.96885	0.0601992
4.4	1.01298	0.258312	1.0116	0.0478515	0.960113	0.0580457
4.6	1.00427	0.150623	1.01843	0.0527729	0.964434	0.0412295
4.8	1.13994	0.23862	1.01802	0.0738468	0.968596	0.0524023
5	0.961915	0.179761	1.00975	0.0971294	0.969195	0.0507019
5.2	0.881922	0.198709	0.998883	0.0459993	0.985926	0.0649853
5.4	0.989877	0.205542	0.996139	0.078701	0.974477	0.0469144
5.6	1.03528	0.192835	1.01877	0.0571447	0.983253	0.0466225
5.8	0.918385	0.192868	1.00287	0.0373958	0.980926	0.0390598
6	1.07396	0.13734	0.998857	0.0773793	0.975345	0.036308
6.2	1.08744	0.150443	1.00312	0.0248311	0.981669	0.0439836
6.4	0.942278	0.154036	1.04243	0.0753115	0.984529	0.0437624
6.6	1.14575	0.185034	1.02084	0.109156	0.986979	0.0438548
6.8	1.03327	0.12611	1.03099	0.0365139	0.986737	0.0615667
7	1.09999	0.28407	0.990446	0.0592031	0.985251	0.0435114
7.2	1.14409	0.253391	1.03057	0.0518723	0.981102	0.0322018
7.4	0.993335	0.115122	0.972841	0.0408301	0.986285	0.0391119
7.6	1.00939	0.158115	1.06027	0.101936	0.98938	0.0593766
7.8	1.09221	0.237606	1.02507	0.0666201	0.976551	0.0251368
8	1.13901	0.237827	1.00798	0.0569044	0.979922	0.0335985
8.2	0.942685	0.173949	1.00033	0.0660945	0.988651	0.0303849
8.4	0.960233	0.221344	0.965553	0.0845681	0.992399	0.0366473
8.6	1.01446	0.253266	1.02058	0.046858	0.987441	0.0311608
8.8	1.01391	0.130881	1.03362	0.0410122	0.995346	0.0226146
