# Supplementary material for: Analogue signaling of somatodendritic synaptic activity to axon enhances GABA release in young cerebellar molecular layer interneurons
Source: eLife. 2023 Aug 11;12:e85971. doi: 10.7554/eLife.85971 (PMC10421593; doi:10.7554/eLife.85971)
Supplement: Figure 5—source data 1. [file elife-85971-fig5-data1.xlsx]

## Sheet: 5A,B,C
Data related to Figure 5A, 5B and 5C: amplitude of presynaptic calcium current and postsynaptic current as a function of 2 different presynaptic voltage waveforms
Exp #	ICa pre amplitude*		Exp #	PSC amplitude*
1	0.991718		1	1.19355
2	1.048		2	1.26087
3	1.12426		3	1.36782
4	1.12264		4	2.08
5	1.09302		5	1.325
6	1.75476		6	2.24615
7	1.39252
8	1.46154
9	1.1791
N	9		N	6
Average	1.24084		Average	1.5789
SD	0.247058		SD	0.459343
* Amplitude ratio of the current with/without the preAP depolarization
Results from the built-in Igor Pro function: StatsWilcoxonRankTest:
ICa pre amplitude			PSC amplitude
n	9		n	6
Tp	44		Tp	21
Tm	1		Tm	0
P_lower_tail	0.998047		P_lower_tail	1
P_upper_tail	0.00390625		P_upper_tail	0.015625
P_two_tail	0.0078125		P_two_tail	0.03125
Tp: sums of the positive ranks
Tm: sums of the negative ranks

## Sheet: 5E
Data related to Figure 5D, 5E and supplementary Figure 2: amplitude of presynaptic calcium current and postsynaptic current as a function pf prepulse potential
	No interval: N=16
	Presynaptic calcium current
HP (mV)	Exp #1	2	3	4	5	6	7	8	9	10	11	12	13	14	15	16	AV	SD
-90	0.911835	0.86345	0.729207	1.03397	0.968383	0.933624	0.989492	0.963742	0.920396	0.894061	0.898339	0.776483	1.06289	0.665089	0.883077	0.949035	0.902692	0.105348
-80	0.880701	1.00976	0.755167	1.07843	0.975076	0.944062	0.936938	0.838599	0.938377	0.901254	0.924839	0.733596	0.915972	0.820392	0.967405	0.892643	0.907076	0.088738
-70	1	1	1	1	1	1	0.999999	1	1	1	1	1	1	1	1	1	1	2.5e-07
-60	1.0794	1.15692	0.883735	1.15236	0.900584	1.07021	0.859443	1.02688	0.995528	1.03774	1.06739	1.22568	1.24609	1.02738	1.07875	1.04057	1.05304	0.110759
-50	1.095	1.14276	0.923335	1.31195	0.926408	0.924811	1.00473	1.06995	1.00882	1.09189	1.16237	1.23318	1.01553	1.38067	1.332	1.1425	1.11037	0.145744
-40	1.20054	1.50524	1.1919	1.25654	1.13836	1.06154	0.89237	1.23274	1.04901	1.0864	1.1978	1.36171	1.40751	1.49132	1.64732	1.04968	1.23562	0.201211
	Postsynaptic current
HP (mV)	Exp #1	2	3	4	5	6	7	8	9	10	11	12	13	14	15	16
-90	0.958802	0.469973	1.91643	0.786704	0.530246	0.643537	1.16016	0.92606	1.83477	0.696959	0.954886	0.900806	0.688936	0.701301	0.782762	0.991443	0.933986	0.409136
-80	1.00159	0.740272	2.09534	1.31742	0.489434	0.688058	0.843114	0.918395	1.71996	0.746753	1.01799	1.11406	0.866855	0.912141	1.19825	0.999017	1.04179	0.399154
-70	1	1	1	0.999999	0.999999	1	0.999999	1	0.999999	1	1	1	1	1	1	0.999999	1	4.78714e-07
-60	1.36615	1.2921	2.22685	1.03478	0.717674	0.847442	1.12575	0.948152	1.26993	2.39498	1.52553	2.66522	0.997368	1.27689	1.16577	1.29429	1.3843	0.562313
-50	1.5279	1.48088	2.96239	1.21657	0.727148	1.07563	1.055	1.06019	3.85395	2.77923	2.50144	2.7367	1.39329	1.07707	0.891183	2.49282	1.80196	0.937601
-40	1.62774	1.53352	4.26448	3.297	1.8079	1.88359	1.24213	2.31222	8.01962	3.97741	5.08861	3.12411	1.70019	1.26182	1.18893	4.02139	2.89692	1.85013
	5 ms interval: N=4
	Presynaptic calcium current
HP (mV)	Exp #1	2	3	4	AV	SD
-90	0.941376	0.90956	1.0034	0.939676	0.948503	0.0394079
-80	0.885301	0.939865	1.01093	0.974877	0.952743	0.0535098
-70	1	0.999999	1	0.999997	0.999999	1.41421e-06
-60	1.03055	0.977911	1.01711	1.02272	1.01207	0.023432
-50	1.02362	1.007	1.06119	0.986391	1.01955	0.0316622
-40	1.07796	0.979796	1.0443	0.956086	1.01454	0.0563672
	Postsynaptic current
HP (mV)	Exp #1	2	3	4	AV	SD
-90	1.54162	1.22915	1.12547	0.910928	1.20179	0.262462
-80	1.20698	1.14096	0.996474	0.817736	1.04054	0.172598
-70	1	1	1	1	1	0
-60	1.5233	0.892991	1.14496	1.09311	1.16359	0.263268
-50	1.13299	0.993035	1.71783	1.04254	1.2216	0.335857
-40	1.31846	1.04822	1.07101	1.39214	1.20746	0.173593
