# Supplementary material for: Analogue signaling of somatodendritic synaptic activity to axon enhances GABA release in young cerebellar molecular layer interneurons
Source: eLife. 2023 Aug 11;12:e85971. doi: 10.7554/eLife.85971 (PMC10421593; doi:10.7554/eLife.85971)
Supplement: Figure 6—source data 1. [file elife-85971-fig6-data1.xlsx]

## Sheet: 6A
Data related to Figure 6A: amplitude of presynaptic calcium current
	Ica_pre_amplitude
Exp #	1 ms duration pulse	Exp #	2 ms	Exp #	5 ms	Exp #	10 ms	Exp #	20 ms	Exp #	50 ms
1	-2.2533e-11	1	-4.51321e-11	1	-5.75896e-11	1	-1.38859e-11	1	-4.73003e-11	1	-5.36012e-11
2	-2.3722e-11	2	-3.58973e-11	2	-4.6464e-11	2	-4.81583e-11	2	-4.78607e-11	2	-4.74838e-11
3	-2.11528e-11	3	-6.14135e-11	3	-2.68084e-11	3	-3.39875e-11	3	-5.16188e-11	3	-5.6596e-11
4	-7.53049e-12	4	-4.4591e-11	4	-5.9601e-11	4	-5.54057e-11	4	-5.65987e-11	4	-5.41153e-11
		5	-1.59442e-11	5	-3.1625e-10	5	-6.72807e-11	5	-8.00621e-11	5	-9.52516e-11
		6	-1.1027e-11	6	-6.1395e-11	6	-2.66008e-10	6	-2.57717e-10	6	-2.5419e-10
		7	-9.8978e-12	7	-3.2219e-11	7	-5.90159e-11	7	-4.04609e-11	7	-4.02467e-11
		8	-1.8e-11	8	-1.6314e-11	8	-4.35494e-11	8	-3.63474e-11	8	-4.17211e-11
				9	-4.5061e-11	9	-8.49654e-11	9	-1.0687e-10	9	-1.05105e-10
				10	-5.3187e-11	10	-9.44833e-11	10	-3.13747e-11	10	-5.71851e-11
				11	-8.7717e-11	11	-4.0605e-11	11	-4.0031e-11	11	-4.0208e-11
				12	-3.1456e-12	12	-2.923e-11	12	-6.14787e-11	12	-6.48972e-11
						13	-1.1199e-10	13	-1.17587e-10	13	-1.13908e-10
						14	-1.2207e-10	14	-1.1302e-10	14	-1.16096e-10
						15	-1.5569e-10	15	-1.53104e-10	15	-1.32675e-10
						16	-2.1025e-11	16	-2.04439e-11	16	-2.31764e-11
Summary
Pulse duration (ms)	AV	SD	SEM	N
1	-1.87346e-11	7.54281e-12	3.77141e-12	4
2	-3.02379e-11	1.91559e-11	6.77263e-12	8
5	-6.7146e-11	8.16281e-11	2.3564e-11	12
10	-7.79593e-11	6.3736e-11	1.5934e-11	16
20	-7.88672e-11	6.05024e-11	1.51256e-11	16
50	-8.10285e-11	5.6565e-11	1.41413e-11	16

## Sheet: 6B
Figure6B: ICa_state probability_optimized for MLI bouton
Model		ECa	60	mV	changing the 3 parameters (listed left) automatically changes the results shown in graphs
		Vact(Cav)_50	-17	mV											ICa in MLI bouton (patch-clamp)
		alpha	0.2												Vm	Ica_recorded	SD	SEM
							Voltage sensor states								-70	0.0140974	0.032186	0.0080465
Vm	Driving force	P (channel_act)	ICa	Norm_ICa	P(S4_act)		Fully active (4act_0in)	d (3act_1in)	c (2act_2in)	b (1act_3in)	a (4in)	Total closed (a-d)	Total (for check)		-60	0.00506142	0.00671092	0.00167773
-100	-160	6.17606e-08	-9.8817e-06	-1.65818e-07	0.0157644		6.17606e-08	1.54238e-05	0.00144446	0.0601222	0.938418	1	1		-50	0.00533396	0.00839518	0.0020988
-99	-159	7.54346e-08	-1.19941e-05	-2.01264e-07	0.0165727		7.54346e-08	1.79052e-05	0.00159375	0.0630492	0.935339	1	1		-40	0.00895606	0.0132375	0.00330936
-98	-158	9.2136e-08	-1.45575e-05	-2.44279e-07	0.0174224		9.2136e-08	2.07849e-05	0.00175833	0.0661101	0.932111	1	1		-30	0.200114	0.325016	0.0812541
-97	-157	1.12535e-07	-1.7668e-05	-2.96474e-07	0.0183156		1.12535e-07	2.41267e-05	0.00193972	0.0693103	0.928726	1	1		-20	0.527853	0.487685	0.121921
-96	-156	1.37451e-07	-2.14423e-05	-3.59808e-07	0.0192547		1.37451e-07	2.80044e-05	0.00213962	0.072655	0.925177	1	1		-10	0.949502	0.322448	0.080612
-95	-155	1.67883e-07	-2.60218e-05	-4.36653e-07	0.0202419		1.67883e-07	3.25037e-05	0.00235989	0.0761497	0.921458	1	1		0	1	1.17764e-06	2.94409e-07
-94	-154	2.05052e-07	-3.15781e-05	-5.29889e-07	0.0212797		2.05052e-07	3.7724e-05	0.00260256	0.0797998	0.91756	1	1		10	0.862944	0.158089	0.0395223
-93	-153	2.50452e-07	-3.83191e-05	-6.43005e-07	0.0223708		2.50452e-07	4.37801e-05	0.00286987	0.083611	0.913475	1	1		20	0.692823	0.170696	0.042674
-92	-152	3.05902e-07	-4.64971e-05	-7.80235e-07	0.0235177		3.05902e-07	5.08056e-05	0.00316425	0.0875888	0.909196	1	1		30	0.518396	0.219857	0.0549642
-91	-151	3.7363e-07	-5.64181e-05	-9.46711e-07	0.0247235		3.7363e-07	5.89548e-05	0.00348841	0.0917389	0.904713	1	1		40	0.34294	0.372748	0.0931871
-90	-150	4.56352e-07	-6.84529e-05	-1.14866e-06	0.0259911		4.56352e-07	6.84066e-05	0.00384527	0.0960669	0.900019	1	1
-89	-149	5.5739e-07	-8.30511e-05	-1.39362e-06	0.0273237		5.5739e-07	7.93684e-05	0.00423806	0.100578	0.895104	0.999999	1
-88	-148	6.80798e-07	-0.000100758	-1.69075e-06	0.0287246		6.80798e-07	9.20801e-05	0.0046703	0.105279	0.889958	0.999999	1
-87	-147	8.31528e-07	-0.000122235	-2.05113e-06	0.0301974		8.31528e-07	0.00010682	0.00514584	0.110174	0.884572	0.999999	1
-86	-146	1.01563e-06	-0.000148282	-2.48821e-06	0.0317456		1.01563e-06	0.000123909	0.00566889	0.115269	0.878937	0.999999	1
-85	-145	1.24049e-06	-0.000179872	-3.01829e-06	0.0333733		1.24049e-06	0.000143719	0.00624405	0.120569	0.873042	0.999999	1
-84	-144	1.51514e-06	-0.00021818	-3.66113e-06	0.0350843		1.51514e-06	0.000166682	0.00687633	0.126079	0.866877	0.999998	1
-83	-143	1.8506e-06	-0.000264635	-4.44066e-06	0.0368832		1.8506e-06	0.000193296	0.00757121	0.131803	0.860431	0.999998	1
-82	-142	2.26032e-06	-0.000320966	-5.3859e-06	0.0387742		2.26032e-06	0.000224137	0.00833465	0.137746	0.853693	0.999998	1
-81	-141	2.76076e-06	-0.000389268	-6.53202e-06	0.0407622		2.76076e-06	0.000259871	0.00917315	0.143912	0.846652	0.999997	1
-80	-140	3.372e-06	-0.000472081	-7.92164e-06	0.0428521		3.372e-06	0.000301269	0.0100938	0.150304	0.839298	0.999997	1		CURVE	Channel state
-79	-139	4.11857e-06	-0.000572481	-9.6064e-06	0.0450492		4.11857e-06	0.000349222	0.0111042	0.156924	0.831618	0.999996	1		Red	P open
-78	-138	5.03043e-06	-0.000694199	-1.16489e-05	0.0473589		5.03043e-06	0.000404756	0.0122127	0.163776	0.823602	0.999995	1		Magenta	Ps_act
-77	-137	6.14417e-06	-0.000841752	-1.41248e-05	0.049787		6.14417e-06	0.00046906	0.0134284	0.170859	0.815237	0.999994	1		orange	state d
-76	-136	7.5045e-06	-0.00102061	-1.71262e-05	0.0523396		7.5045e-06	0.000543506	0.0147611	0.178176	0.806512	0.999992	1		green	state c
-75	-135	9.166e-06	-0.00123741	-2.07641e-05	0.0550231		9.166e-06	0.000629675	0.0162212	0.185724	0.797416	0.999991	1		blue	state b
-74	-134	1.11954e-05	-0.00150018	-2.51734e-05	0.0578442		1.11954e-05	0.000729392	0.0178203	0.193503	0.787936	0.999989	1		black	state a
-73	-133	1.3674e-05	-0.00181864	-3.05173e-05	0.0608099		1.3674e-05	0.000844764	0.0195707	0.201509	0.778062	0.999986	1
-72	-132	1.67014e-05	-0.00220459	-3.69936e-05	0.0639276		1.67014e-05	0.000978215	0.0214856	0.209738	0.767782	0.999983	1
-71	-131	2.03991e-05	-0.00267228	-4.48416e-05	0.0672052		2.03991e-05	0.00113254	0.0235792	0.218183	0.757085	0.99998	1
-70	-130	2.49154e-05	-0.003239	-5.43513e-05	0.0706508		2.49154e-05	0.00131096	0.0258668	0.226837	0.74596	0.999975	1
-69	-129	3.04316e-05	-0.00392567	-6.58738e-05	0.074273		3.04316e-05	0.00151718	0.0283648	0.235689	0.734398	0.99997	1
-68	-128	3.71689e-05	-0.00475762	-7.98342e-05	0.0780809		3.71689e-05	0.00175545	0.0310904	0.244728	0.722389	0.999963	1
-67	-127	4.53979e-05	-0.00576553	-9.67472e-05	0.0820841		4.53979e-05	0.00203067	0.0340624	0.253938	0.709924	0.999955	1
-66	-126	5.54485e-05	-0.00698651	-0.000117236	0.0862924		5.54485e-05	0.00234847	0.0373002	0.263302	0.696994	0.999945	1
-65	-125	6.77241e-05	-0.00846552	-0.000142054	0.0907164		6.77241e-05	0.00271529	0.0408246	0.2728	0.683593	0.999932	1
-64	-124	8.27172e-05	-0.0102569	-0.000172114	0.0953672		8.27172e-05	0.00313855	0.0446574	0.282407	0.669714	0.999917	1
-63	-123	0.000101029	-0.0124266	-0.000208522	0.100256		0.000101029	0.00362672	0.0488216	0.292098	0.655353	0.999899	1
-62	-122	0.000123395	-0.0150541	-0.000252613	0.105396		0.000123395	0.00418951	0.053341	0.30184	0.640506	0.999877	1
-61	-121	0.00015071	-0.018236	-0.000306004	0.110799		0.00015071	0.00483802	0.0582402	0.311599	0.625172	0.999849	1
-60	-120	0.000184072	-0.0220886	-0.000370653	0.116479		0.000184072	0.00558493	0.0635446	0.321335	0.609352	0.999816	1
-59	-119	0.000224817	-0.0267532	-0.000448926	0.12245		0.000224817	0.00644471	0.0692803	0.331004	0.593046	0.999775	1
-58	-118	0.000274578	-0.0324002	-0.000543685	0.128726		0.000274578	0.00743386	0.0754734	0.340558	0.576261	0.999725	1
-57	-117	0.00033535	-0.039236	-0.00065839	0.135324		0.00033535	0.00857111	0.08215	0.349941	0.559002	0.999665	1
-56	-116	0.000409567	-0.0475098	-0.000797227	0.14226		0.000409567	0.00987779	0.0893358	0.359095	0.541282	0.99959	1
-55	-115	0.000500201	-0.0575231	-0.000965254	0.14955		0.000500201	0.011378	0.0970557	0.367953	0.523113	0.9995	1
-54	-114	0.000610879	-0.0696402	-0.00116858	0.157213		0.000610879	0.0130992	0.105333	0.376445	0.504511	0.999389	1
-53	-113	0.000746029	-0.0843013	-0.0014146	0.165268		0.000746029	0.0150721	0.114189	0.384494	0.485499	0.999254	1
-52	-112	0.000911051	-0.102038	-0.00171222	0.173734		0.000911051	0.0173315	0.123641	0.392017	0.4661	0.999089	1
-51	-111	0.00111254	-0.123491	-0.00207222	0.182633		0.00111254	0.0199165	0.133704	0.398924	0.446343	0.998887	1
-50	-110	0.00135852	-0.149437	-0.0025076	0.191985		0.00135852	0.0228707	0.144385	0.405122	0.426264	0.998641	1
-49	-109	0.0016588	-0.180809	-0.00303403	0.201813		0.0016588	0.0262428	0.155689	0.410509	0.4059	0.998341	1
-48	-108	0.00202532	-0.218735	-0.00367043	0.21214		0.00202532	0.030087	0.167608	0.414983	0.385297	0.997975	1
-47	-107	0.00247262	-0.264571	-0.00443957	0.222992		0.00247262	0.0344631	0.180128	0.418433	0.364504	0.997527	1
-46	-106	0.00301842	-0.319952	-0.00536889	0.234393		0.00301842	0.0394367	0.19322	0.420748	0.343576	0.996982	1
-45	-105	0.00368424	-0.386845	-0.00649137	0.24637		0.00368424	0.0450795	0.206844	0.421815	0.322577	0.996316	1
-44	-104	0.00449627	-0.467612	-0.00784667	0.258948		0.00449627	0.0514693	0.22094	0.42152	0.301574	0.995504	1
-43	-103	0.0054863	-0.565089	-0.00948235	0.272157		0.0054863	0.0586891	0.235432	0.419752	0.28064	0.994514	1
-42	-102	0.00669285	-0.682671	-0.0114554	0.286024		0.00669285	0.066827	0.250221	0.416402	0.259857	0.993307	1
-41	-101	0.00816257	-0.82442	-0.013834	0.300578		0.00816257	0.0759748	0.265182	0.411372	0.239308	0.991837	1
-40	-100	0.0099518	-0.99518	-0.0166994	0.315846		0.0099518	0.0862264	0.280162	0.404573	0.219086	0.990048	1
-39	-99	0.0121284	-1.20072	-0.0201483	0.331857		0.0121284	0.0976749	0.29498	0.395931	0.199286	0.987872	1
-38	-98	0.014774	-1.44786	-0.0242954	0.348638		0.014774	0.11041	0.309418	0.385391	0.180007	0.985226	1
-37	-97	0.0179862	-1.74466	-0.0292759	0.366214		0.0179862	0.124511	0.323226	0.372926	0.161351	0.982014	1
-36	-96	0.0218813	-2.1006	-0.0352487	0.384608		0.0218813	0.140045	0.336118	0.358537	0.143419	0.978119	1
-35	-95	0.026597	-2.52671	-0.042399	0.403839		0.026597	0.157054	0.347772	0.342262	0.126315	0.973403	1
-34	-94	0.0322955	-3.03577	-0.0509411	0.423921		0.0322955	0.175549	0.357837	0.324183	0.110135	0.967705	1
-33	-93	0.0391657	-3.64241	-0.0611207	0.444863		0.0391657	0.195497	0.365935	0.304429	0.0949729	0.960834	1
-32	-92	0.0474259	-4.36318	-0.0732154	0.466663		0.0474259	0.216807	0.371673	0.283183	0.0809106	0.952574	1
-31	-91	0.0573242	-5.2165	-0.0875343	0.48931		0.0573242	0.239315	0.374657	0.260685	0.0680187	0.942676	1
-30	-90	0.0691384	-6.22246	-0.104415	0.512779		0.0691384	0.26277	0.37451	0.23723	0.0563515	0.930862	1
-29	-89	0.0831727	-7.40237	-0.124214	0.537026		0.0831727	0.286815	0.370899	0.21317	0.0459438	0.916827	1
-28	-88	0.0997505	-8.77804	-0.147298	0.56199		0.0997505	0.310978	0.36356	0.188904	0.0368074	0.90025	1
-27	-87	0.119203	-10.3707	-0.174022	0.587586		0.119203	0.334663	0.352339	0.164866	0.0289289	0.880797	1
-26	-86	0.141851	-12.1992	-0.204706	0.613703		0.141851	0.357154	0.337218	0.141509	0.0222682	0.858149	1
-25	-85	0.167982	-14.2784	-0.239596	0.6402		0.167982	0.377631	0.31835	0.119278	0.0167589	0.832018	1
-24	-84	0.197816	-16.6166	-0.27883	0.666907		0.197816	0.395204	0.296082	0.0985873	0.0123101	0.802184	1
-23	-83	0.231475	-19.2124	-0.32239	0.693627		0.231475	0.408967	0.270959	0.0797878	0.0088105	0.768525	1
-22	-82	0.268941	-22.0532	-0.370059	0.720136		0.268941	0.418071	0.243711	0.0631417	0.00613464	0.731059	1
-21	-81	0.310026	-25.1121	-0.421387	0.74619		0.310026	0.42181	0.215213	0.0488018	0.00414988	0.689974	1
-20	-80	0.354344	-28.3475	-0.475679	0.771536		0.354344	0.419707	0.186423	0.0368019	0.0027244	0.645656	1
-19	-79	0.401312	-31.7037	-0.531996	0.795922		0.401312	0.411593	0.158301	0.0270594	0.00173453	0.598688	1
-18	-78	0.450166	-35.1129	-0.589205	0.819112		0.450166	0.397649	0.131722	0.0193925	0.00107063	0.549834	1
-17	-77	0.5	-38.5	-0.646041	0.840896		0.5	0.378414	0.107398	0.013547	0.000640796	0.5	1
-16	-76	0.549834	-41.7874	-0.701204	0.861109		0.549834	0.354739	0.0858259	0.00922878	0.000372136	0.450166	1
-15	-75	0.598688	-44.9016	-0.753461	0.87963		0.598688	0.327701	0.0672647	0.0061364	0.000209929	0.401312	1
-14	-74	0.645656	-47.7786	-0.801738	0.896397		0.645656	0.298493	0.0517485	0.0039873	0.00011521	0.354344	1
-13	-73	0.689974	-50.3681	-0.845191	0.911398		0.689974	0.268304	0.0391247	0.00253567	6.16264e-05	0.310026	1
-12	-72	0.731059	-52.6362	-0.88325	0.924673		0.731059	0.238219	0.0291093	0.0015809	3.21965e-05	0.268941	1
-11	-71	0.768525	-54.5653	-0.91562	0.936299		0.768525	0.209147	0.021344	0.000968093	1.64661e-05	0.231475	1
-10	-70	0.802184	-56.1529	-0.942261	0.946386		0.802184	0.181778	0.0154468	0.000583383	8.26229e-06	0.197816	1
-9	-69	0.832018	-57.4093	-0.963343	0.955066		0.832018	0.156581	0.0110503	0.0003466	4.07674e-06	0.167982	1
-8	-68	0.858149	-58.3541	-0.979198	0.962478		0.858149	0.13382	0.0078255	0.000203385	1.98225e-06	0.141851	1
-7	-67	0.880797	-59.0134	-0.990261	0.968766		0.880797	0.113591	0.00549338	0.000118074	9.51701e-07	0.119203	1
-6	-66	0.90025	-59.4165	-0.997025	0.974071		0.90025	0.0958548	0.00382733	6.79197e-05	4.51988e-07	0.0997505	1
-5	-65	0.916827	-59.5938	-1	0.978525		0.916827	0.0804842	0.00264951	3.87648e-05	2.12687e-07	0.0831727	1
-4	-64	0.930862	-59.5751	-0.999687	0.982248		0.930862	0.0672921	0.00182421	2.19787e-05	9.93029e-08	0.0691384	1
-3	-63	0.942676	-59.3886	-0.996557	0.98535		0.942676	0.0560615	0.00125025	1.23922e-05	4.60608e-08	0.0573242	1
-2	-62	0.952574	-59.0596	-0.991036	0.987927		0.952574	0.0465653	0.000853605	6.95456e-06	2.12478e-08	0.0474259	1
-1	-61	0.960834	-58.6109	-0.983507	0.990061		0.960834	0.0385809	0.000580935	3.88776e-06	9.75671e-09	0.0391657	1
0	-60	0.967705	-58.0623	-0.974301	0.991826		0.967705	0.031899	0.000394314	2.16633e-06	4.46312e-09	0.0322955	1
1	-59	0.973403	-57.4308	-0.963704	0.993283		0.973403	0.0263287	0.000267054	1.20388e-06	2.03518e-09	0.026597	1
2	-58	0.978119	-56.7309	-0.95196	0.994484		0.978119	0.0217001	0.000180535	6.67544e-07	9.25613e-10	0.0218813	1
3	-57	0.982014	-55.9748	-0.939272	0.995473		0.982014	0.017864	0.000121862	3.6947e-07	4.20068e-10	0.0179862	1
4	-56	0.985226	-55.1727	-0.925812	0.996286		0.985226	0.0146917	8.21557e-05	2.04184e-07	1.90299e-10	0.014774	1
5	-55	0.987872	-54.3329	-0.911722	0.996954		0.987872	0.012073	5.533e-05	1.127e-07	8.60832e-11	0.0121284	1
6	-54	0.990048	-53.4626	-0.897117	0.997503		0.990048	0.00991451	3.72321e-05	6.21414e-08	3.88934e-11	0.0099518	1
7	-53	0.991837	-52.5674	-0.882095	0.997953		0.991837	0.0081375	2.50365e-05	3.42351e-08	1.75551e-11	0.00816257	1
8	-52	0.993307	-51.652	-0.866734	0.998323		0.993307	0.00667601	1.6826e-05	1.88479e-08	7.91728e-12	0.00669285	1
9	-51	0.994514	-50.7202	-0.851099	0.998626		0.994514	0.00547499	1.13028e-05	1.03707e-08	3.56829e-12	0.0054863	1
10	-50	0.995504	-49.7752	-0.835241	0.998874		0.995504	0.00448868	7.58971e-06	5.70361e-09	1.60733e-12	0.00449627	1
11	-49	0.996316	-48.8195	-0.819204	0.999078		0.996316	0.00367914	5.0948e-06	3.13564e-09	7.23694e-13	0.00368424	1
12	-48	0.996982	-47.8551	-0.803022	0.999245		0.996982	0.003015	3.41914e-06	1.72332e-09	3.25721e-13	0.00301842	1
13	-47	0.997527	-46.8838	-0.786723	0.999381		0.997527	0.00247033	2.29412e-06	9.46879e-10	1.46556e-13	0.00247262	1
14	-46	0.997975	-45.9068	-0.770329	0.999493		0.997975	0.00202378	1.539e-06	5.20153e-10	6.59258e-14	0.00202532	1
15	-45	0.998341	-44.9254	-0.75386	0.999585		0.998341	0.00165777	1.03229e-06	2.85689e-10	2.96496e-14	0.0016588	1
16	-44	0.998641	-43.9402	-0.737329	0.99966		0.998641	0.00135783	6.92326e-07	1.5689e-10	1.33324e-14	0.00135852	1
17	-43	0.998887	-42.9522	-0.720749	0.999722		0.998887	0.00111207	4.6428e-07	8.6148e-11	5.99434e-15	0.00111254	1
18	-42	0.999089	-41.9617	-0.70413	0.999772		0.999089	0.00091074	3.11326e-07	4.72993e-11	2.69479e-15	0.000911051	1
19	-41	0.999254	-40.9694	-0.687478	0.999813		0.999254	0.00074582	2.08749e-07	2.59675e-11	1.21135e-15	0.000746029	1
20	-40	0.999389	-39.9756	-0.670801	0.999847		0.999389	0.000610739	1.39961e-07	1.42554e-11	5.44477e-16	0.000610879	1
21	-39	0.9995	-38.9805	-0.654103	0.999875		0.9995	0.000500107	9.38372e-08	7.82536e-12	2.44717e-16	0.000500201	1
22	-38	0.99959	-37.9844	-0.637389	0.999898		0.99959	0.000409504	6.29109e-08	4.29547e-12	1.09983e-16	0.000409567	1
23	-37	0.999665	-36.9876	-0.620662	0.999916		0.999665	0.000335308	4.21759e-08	2.35778e-12	4.94279e-17	0.00033535	1
24	-36	0.999725	-35.9901	-0.603924	0.999931		0.999725	0.00027455	2.82744e-08	1.29414e-12	2.22128e-17	0.000274578	1
25	-35	0.999775	-34.9921	-0.587178	0.999944		0.999775	0.000224798	1.89545e-08	7.10316e-13	9.98209e-18	0.000224817	1
26	-34	0.999816	-33.9937	-0.570424	0.999954		0.999816	0.000184059	1.27065e-08	3.89863e-13	4.4857e-18	0.000184072	1
27	-33	0.999849	-32.995	-0.553666	0.999962		0.999849	0.000150702	8.51793e-09	2.13977e-13	2.01572e-18	0.00015071	1
28	-32	0.999877	-31.9961	-0.536903	0.999969		0.999877	0.000123389	5.71001e-09	1.1744e-13	9.05784e-19	0.000123395	1
29	-31	0.999899	-30.9969	-0.520136	0.999975		0.999899	0.000101025	3.82768e-09	6.44554e-14	4.07018e-19	0.000101029	1
30	-30	0.999917	-29.9975	-0.503367	0.999979		0.999917	8.27147e-05	2.56586e-09	3.53752e-14	1.82893e-19	8.27172e-05	1
31	-29	0.999932	-28.998	-0.486595	0.999983		0.999932	6.77224e-05	1.71999e-09	1.9415e-14	8.21823e-20	6.77241e-05	1
32	-28	0.999945	-27.9984	-0.469822	0.999986		0.999945	5.54474e-05	1.15297e-09	1.06554e-14	3.6928e-20	5.54485e-05	1
33	-27	0.999955	-26.9988	-0.453047	0.999989		0.999955	4.53971e-05	7.72871e-10	5.84795e-15	1.65933e-20	4.53979e-05	1
34	-26	0.999963	-25.999	-0.436271	0.999991		0.999963	3.71684e-05	5.18079e-10	3.20948e-15	7.45598e-21	3.71689e-05	1
35	-25	0.99997	-24.9992	-0.419494	0.999992		0.99997	3.04312e-05	3.47283e-10	1.76142e-15	3.35024e-21	3.04316e-05	1
36	-24	0.999975	-23.9994	-0.402717	0.999994		0.999975	2.49152e-05	2.32793e-10	9.66702e-16	1.50538e-21	2.49154e-05	1
37	-23	0.99998	-22.9995	-0.385938	0.999995		0.99998	2.03989e-05	1.56047e-10	5.30542e-16	6.7642e-22	2.03991e-05	1
38	-22	0.999983	-21.9996	-0.36916	0.999996		0.999983	1.67013e-05	1.04602e-10	2.9117e-16	3.03938e-22	1.67014e-05	1
39	-21	0.999986	-20.9997	-0.352381	0.999997		0.999986	1.36739e-05	7.01172e-11	1.59799e-16	1.36569e-22	1.3674e-05	1
40	-20	0.999989	-19.9998	-0.335602	0.999997		0.999989	1.11953e-05	4.70012e-11	8.76998e-17	6.13648e-23	1.11954e-05	1
41	-19	0.999991	-18.9998	-0.318822	0.999998		0.999991	9.16597e-06	3.15059e-11	4.81309e-17	2.75731e-23	9.166e-06	1
42	-18	0.999992	-17.9999	-0.302043	0.999998		0.999992	7.50448e-06	2.11191e-11	2.64149e-17	1.23895e-23	7.5045e-06	1
43	-17	0.999994	-16.9999	-0.285263	0.999998		0.999994	6.14416e-06	1.41566e-11	1.44968e-17	5.56696e-24	6.14417e-06	1
44	-16	0.999995	-15.9999	-0.268483	0.999999		0.999995	5.03042e-06	9.48947e-12	7.95605e-18	2.5014e-24	5.03043e-06	1
45	-15	0.999996	-14.9999	-0.251703	0.999999		0.999996	4.11857e-06	6.36099e-12	4.36638e-18	1.12396e-24	4.11857e-06	1
46	-14	0.999997	-14	-0.234923	0.999999		0.999997	3.372e-06	4.26391e-12	2.39632e-18	5.05027e-25	3.372e-06	1
47	-13	0.999997	-13	-0.218143	0.999999		0.999997	2.76076e-06	2.85819e-12	1.31513e-18	2.26924e-25	2.76076e-06	1
48	-12	0.999998	-12	-0.201363	0.999999		0.999998	2.26032e-06	1.9159e-12	7.21761e-19	1.01963e-25	2.26032e-06	1
49	-11	0.999998	-11	-0.184583	1		0.999998	1.8506e-06	1.28427e-12	3.96111e-19	4.58152e-26	1.8506e-06	1
50	-10	0.999998	-9.99998	-0.167803	1		0.999998	1.51514e-06	8.60871e-13	2.1739e-19	2.05861e-26	1.51514e-06	1
51	-9	0.999999	-8.99999	-0.151022	1		0.999999	1.24049e-06	5.77059e-13	1.19306e-19	9.24994e-27	1.24049e-06	1
52	-8	0.999999	-7.99999	-0.134242	1		0.999999	1.01563e-06	3.86815e-13	6.54768e-20	4.15627e-27	1.01563e-06	1
53	-7	0.999999	-6.99999	-0.117462	1		0.999999	8.31528e-07	2.5929e-13	3.59345e-20	1.86753e-27	8.31528e-07	1
54	-6	0.999999	-6	-0.100682	1		0.999999	6.80797e-07	1.73807e-13	1.97213e-20	8.39137e-28	6.80798e-07	1
55	-5	0.999999	-5	-0.0839013	1		0.999999	5.5739e-07	1.16506e-13	1.08233e-20	3.77049e-28	5.5739e-07	1
56	-4	1	-4	-0.0671211	1		1	4.56352e-07	7.80966e-14	5.93993e-21	1.69419e-28	4.56352e-07	1
57	-3	1	-3	-0.0503408	1		1	3.7363e-07	5.23497e-14	3.2599e-21	7.61248e-29	3.7363e-07	1
58	-2	1	-2	-0.0335605	1		1	3.05902e-07	3.50911e-14	1.78907e-21	3.42051e-29	3.05902e-07	1
59	-1	1	-1	-0.0167803	1		1	2.50452e-07	2.35222e-14	9.81864e-22	1.53693e-29	2.50452e-07	1
60	0	1	0	0	1		1	2.05052e-07	1.57674e-14	5.38859e-22	6.90589e-30	2.05052e-07	1
61	1	1	1	0.0167803	1		1	1.67883e-07	1.05692e-14	2.95732e-22	3.10302e-30	1.67883e-07	1
62	2	1	2	0.0335605	1		1	1.37451e-07	7.08477e-15	1.62301e-22	1.39428e-30	1.37451e-07	1
63	3	1	3	0.0503408	1		1	1.12535e-07	4.74906e-15	8.90727e-23	6.26488e-31	1.12535e-07	1
64	4	1	4	0.0671211	1		1	9.2136e-08	3.18339e-15	4.88842e-23	2.81499e-31	9.2136e-08	1
65	5	1	5	0.0839014	1		1	7.54346e-08	2.13389e-15	2.68282e-23	1.26486e-31	7.54346e-08	1
66	6	1	6	0.100682	1		1	6.17606e-08	1.43039e-15	1.47236e-23	5.68338e-32	6.17606e-08	1
67	7	1	7	0.117462	1		1	5.05653e-08	9.58819e-16	8.0805e-24	2.55371e-32	5.05653e-08	1
68	8	1	8	0.134242	1		1	4.13994e-08	6.42716e-16	4.43467e-24	1.14745e-32	4.13994e-08	1
69	9	1	9	0.151022	1		1	3.38949e-08	4.30825e-16	2.4338e-24	5.15584e-33	3.38949e-08	1
70	10	1	10	0.167803	1		1	2.77508e-08	2.88791e-16	1.3357e-24	2.31667e-33	2.77508e-08	1
71	11	1	11	0.184583	1		1	2.27205e-08	1.93582e-16	7.33046e-25	1.04095e-33	2.27205e-08	1
72	12	1	12	0.201363	1		1	1.86019e-08	1.29762e-16	4.02304e-25	4.67728e-34	1.86019e-08	1
73	13	1	13	0.218144	1		1	1.523e-08	8.69821e-17	2.20789e-25	2.10164e-34	1.523e-08	1
74	14	1	14	0.234924	1		1	1.24693e-08	5.83058e-17	1.21172e-25	9.44326e-35	1.24693e-08	1
75	15	1	15	0.251704	1		1	1.0209e-08	3.90836e-17	6.65005e-26	4.24313e-35	1.0209e-08	1
76	16	1	16	0.268484	1		1	8.35839e-09	2.61985e-17	3.64962e-26	1.90656e-35	8.35839e-09	1
77	17	1	17	0.285265	1		1	6.84327e-09	1.75614e-17	2.00296e-26	8.56673e-36	6.84327e-09	1
78	18	1	18	0.302045	1		1	5.6028e-09	1.17717e-17	1.09925e-26	3.84928e-36	5.6028e-09	1
79	19	1	19	0.318825	1		1	4.58718e-09	7.89084e-18	6.03279e-27	1.72959e-36	4.58718e-09	1
80	20	1	20	0.335606	1		1	3.75567e-09	5.28939e-18	3.31086e-27	7.77156e-37	3.75567e-09	1
81	21	1	21	0.352386	1		1	3.07488e-09	3.54558e-18	1.81704e-27	3.49199e-37	3.07488e-09	1
82	22	1	22	0.369166	1		1	2.5175e-09	2.37667e-18	9.97213e-28	1.56905e-37	2.5175e-09	1
83	23	1	23	0.385946	1		1	2.06115e-09	1.59313e-18	5.47282e-28	7.0502e-38	2.06115e-09	1
84	24	1	24	0.402727	1		1	1.68753e-09	1.06791e-18	3.00355e-28	3.16786e-38	1.68753e-09	1
85	25	1	25	0.419507	1		1	1.38163e-09	7.15841e-19	1.64838e-28	1.42341e-38	1.38163e-09	1
86	26	1	26	0.436287	1		1	1.13119e-09	4.79843e-19	9.04652e-29	6.3958e-39	1.13119e-09	1
87	27	1	27	0.453067	1		1	9.26136e-10	3.21648e-19	4.96483e-29	2.87382e-39	9.26136e-10	1
88	28	1	28	0.469848	1		1	7.58256e-10	2.15607e-19	2.72476e-29	1.29129e-39	7.58256e-10	1
89	29	1	29	0.486628	1		1	6.20808e-10	1.44526e-19	1.49538e-29	5.80215e-40	6.20808e-10	1
90	30	1	30	0.503408	1		1	5.08274e-10	9.68785e-20	8.20681e-30	2.60707e-40	5.08274e-10	1
91	31	1	31	0.520189	1		1	4.1614e-10	6.49397e-20	4.504e-30	1.17143e-40	4.1614e-10	1
92	32	1	32	0.536969	1		1	3.40706e-10	4.35303e-20	2.47184e-30	5.26356e-41	3.40706e-10	1
93	33	1	33	0.553749	1		1	2.78947e-10	2.91792e-20	1.35657e-30	2.36507e-41	2.78947e-10	1
94	34	1	34	0.570529	1		1	2.28383e-10	1.95595e-20	7.44508e-31	1.0627e-41	2.28383e-10	1
95	35	1	35	0.58731	1		1	1.86984e-10	1.31111e-20	4.08594e-31	4.77502e-42	1.86984e-10	1
96	36	1	36	0.60409	1		1	1.53089e-10	8.7886e-21	2.2424e-31	2.14554e-42	1.53089e-10	1
97	37	1	37	0.62087	1		1	1.25339e-10	5.89119e-21	1.23066e-31	9.64057e-43	1.25339e-10	1
98	38	1	38	0.63765	1		1	1.02619e-10	3.94898e-21	6.754e-32	4.33179e-43	1.02619e-10	1
99	39	1	39	0.654431	1		1	8.40172e-11	2.64709e-21	3.70668e-32	1.94641e-43	8.40172e-11	1
100	40	1	40	0.671211	1		1	6.87876e-11	1.7744e-21	2.03428e-32	8.74584e-44	6.87876e-11	1

## Sheet: 6C
Data related to Figure 6C
ICa++ pre sim norm		ICa++ pre normalised		Substraction
dt	data	dt	data	dt	data
0	-6.28943e-05	0	-0.0483109	0
0.01	-6.28494e-05	0.05	-0.0792733	0.05
0.02	-6.28049e-05	0.1	-0.0434222	0.1	-0.021996
0.03	-6.27606e-05	0.15	-0.00594142	0.15	-0.00298175
0.04	-6.27166e-05	0.2	0.0315393	0.2	0.0160325
0.05	-6.26729e-05	0.25	0.0706497	0.25	0.0358735
0.06	-6.26295e-05	0.3	-0.00105262	0.3	-0.000501939
0.07	-6.25864e-05	0.35	-0.0890509	0.35	-0.0451445
0.08	-6.25436e-05	0.4	-0.128161	0.4	-0.0649857
0.09	-6.2501e-05	0.45	-0.0613477	0.45	-0.0310906
0.1	-6.24587e-05	0.5	0.0462057	0.5	0.0234723
0.11	-6.24168e-05	0.55	0.0787977	0.55	0.0400065
0.12	-6.2375e-05	0.6	0.0364281	0.6	0.0185119
0.13	-6.23336e-05	0.65	-0.048311	0.65	-0.0244772
0.14	-6.22924e-05	0.7	-0.00268221	0.7	-0.00132937
0.15	-6.22515e-05	0.75	0.0559833	0.75	0.0284322
0.16	-6.22108e-05	0.8	0.0233914	0.8	0.0118979
0.17	-6.21705e-05	0.85	-0.0173486	0.85	-0.00877001
0.18	-6.21304e-05	0.9	-0.0564589	0.9	-0.0286112
0.19	-6.20905e-05	0.95	-0.0417926	0.95	-0.0211708
0.2	-6.20509e-05	1	-0.0206078	1	-0.0104236
0.21	-6.20116e-05	1.05	0.0543537	1.05	0.0276051
0.22	-6.19725e-05	1.1	0.10813	1.1	0.0548865
0.23	-6.19337e-05	1.15	0.0625017	1.15	0.0317385
0.24	-6.18951e-05	1.2	0.0967232	1.2	0.0490994
0.25	-6.18568e-05	1.25	0.0983528	1.25	0.049926
0.26	-6.18187e-05	1.3	0.0217618	1.3	0.0110705
0.27	-6.17809e-05	1.35	0.00383617	1.35	0.00197663
0.28	-6.17433e-05	1.4	0.0869457	1.4	0.0441389
0.29	-6.1706e-05	1.45	0.116278	1.45	0.0590197
0.3	-6.16689e-05	1.5	-0.00920061	1.5	-0.00463721
0.31	-6.1632e-05	1.55	-0.0874213	1.55	-0.0443194
0.32	-6.15954e-05	1.6	-0.0140894	1.6	-0.00711745
0.33	-6.1559e-05	1.65	0.0641313	1.65	0.0325647
0.34	-6.15229e-05	1.7	0.114649	1.7	0.0581927
0.35	-6.1487e-05	1.75	0.0608721	1.75	0.0309112
0.36	-6.14513e-05	1.8	0.0119842	1.8	0.00610979
0.37	-6.14159e-05	1.85	0.0820569	1.85	0.0416584
0.38	-6.13806e-05	1.9	0.14887	1.9	0.0755535
0.39	-6.13457e-05	1.95	0.0967232	1.95	0.0490987
0.4	-6.13109e-05	2	0.0787977	2	0.0400048
0.41	-6.12764e-05	2.05	0.0185026	2.05	0.00941645
0.42	-6.12421e-05	2.1	-0.0694957	2.1	-0.035226
0.43	-6.1208e-05	2.15	-0.0857917	2.15	-0.0434932
0.44	-6.11741e-05	2.2	-0.0140894	2.2	-0.00711789
0.45	-6.11404e-05	2.25	0.103242	2.25	0.0524054
0.46	-6.1107e-05	2.3	0.0445761	2.3	0.0226437
0.47	-6.10738e-05	2.35	0.00872496	2.35	0.00445599
0.48	-6.10408e-05	2.4	0.00872496	2.4	0.00445596
0.49	-6.1008e-05	2.45	-0.0287558	2.45	-0.0145584
0.5	-6.09754e-05	2.5	-0.0369038	2.5	-0.018692
0.51	-6.0943e-05	2.55	0.0250209	2.55	0.012723
0.52	-6.09109e-05	2.6	0.104871	2.6	0.0532319
0.53	-6.08789e-05	2.65	0.0820569	2.65	0.0416579
0.54	-6.08472e-05	2.7	0.10813	2.7	0.0548853
0.55	-6.08156e-05	2.75	0.113019	2.75	0.0573654
0.56	-6.07843e-05	2.8	-0.0450518	2.8	-0.0228257
0.57	-6.07531e-05	2.85	-0.0515701	2.85	-0.0261326
0.58	-6.07222e-05	2.9	0.0119842	2.9	0.00610916
0.59	-6.06914e-05	2.95	-0.00594141	2.95	-0.0029847
0.6	-6.06609e-05	3	-0.0939397	3	-0.0476272
0.61	-6.06305e-05	3.05	-0.115124	3.05	-0.0583744
0.62	-6.06004e-05	3.1	-0.023867	3.1	-0.0120786
0.63	-6.05704e-05	3.15	-0.0140894	3.15	-0.00711833
0.64	-6.05407e-05	3.2	-0.00268222	3.2	-0.00133136
0.65	-6.05111e-05	3.25	-0.00268222	3.25	-0.00133138
0.66	-6.04817e-05	3.3	-0.0499406	3.3	-0.0253061
0.67	-6.04525e-05	3.35	-0.0629773	3.35	-0.0319198
0.68	-6.04235e-05	3.4	-0.0336446	3.4	-0.017039
0.69	-6.03946e-05	3.45	0.00383617	3.45	0.00197541
0.7	-6.0366e-05	3.5	0.0380577	3.5	0.0193364
0.71	-6.03375e-05	3.55	-0.00757101	3.55	-0.0038116
0.72	-6.03093e-05	3.6	0.0331689	3.6	0.0168562
0.73	-6.02812e-05	3.65	0.0755385	3.65	0.0383507
0.74	-6.02532e-05	3.7	0.00383617	3.7	0.00197534
0.75	-6.02255e-05	3.75	-0.0825325	3.75	-0.0418404
0.76	-6.01979e-05	3.8	-0.0629773	3.8	-0.0319199
0.77	-6.01705e-05	3.85	0.00872497	3.85	0.00445545
0.78	-6.01433e-05	3.9	0.0543537	3.9	0.0276034
0.79	-6.01163e-05	3.95	0.103242	3.95	0.0524047
0.8	-6.00894e-05	4	0.0836865	4	0.0424842
0.81	-6.00627e-05	4.05	0.0233913	4.05	0.0118958
0.82	-6.00362e-05	4.1	0.0201322	4.1	0.0102424
0.83	-6.00098e-05	4.15	0.0999824	4.15	0.0507513
0.84	-5.99836e-05	4.2	0.0983528	4.2	0.0499245
0.85	-5.99576e-05	4.25	0.0250209	4.25	0.0127225
0.86	-5.99318e-05	4.3	-0.00920061	4.3	-0.00463848
0.87	-5.99061e-05	4.35	0.0136138	4.35	0.00693549
0.88	-5.98805e-05	4.4	-0.00268222	4.4	-0.00133164
0.89	-5.98552e-05	4.45	0.016873	4.45	0.0085889
0.9	-5.983e-05	4.5	0.0136138	4.5	0.00693546
0.91	-5.98049e-05	4.55	-0.0548293	4.55	-0.0277864
0.92	-5.978e-05	4.6	-0.160753	4.6	-0.0815228
0.93	-5.97553e-05	4.65	-0.040163	4.65	-0.0203461
0.94	-5.97307e-05	4.7	0.0396873	4.7	0.0201628
0.95	-5.97063e-05	4.75	-0.00594141	4.75	-0.00298512
0.96	-5.9682e-05	4.8	-0.0483109	4.8	-0.0244796
0.97	-5.96579e-05	4.85	0.0185026	4.85	0.00941555
0.98	-5.9634e-05	4.9	0.130945	4.9	0.0664587
0.99	-5.96102e-05	4.95	0.122797	4.95	0.0623251
1	-5.95865e-05	5	0.0559833	5	0.0284299
1.01	-5.9563e-05	5.05	0.0266506	5.05	0.0135491
1.02	-5.95397e-05	5.1	0.0641313	5.1	0.0325635
1.03	-5.95165e-05	5.15	0.0233914	5.15	0.0118957
1.04	-5.94934e-05	5.2	0.000576978	5.2	0.00032168
1.05	-5.94705e-05	5.25	-0.00105262	5.25	-0.000505037
1.06	-5.94477e-05	5.3	-0.0140894	5.3	-0.00711874
1.07	-5.94251e-05	5.35	-0.0303854	5.35	-0.0153859
1.08	-5.94026e-05	5.4	-0.0173486	5.4	-0.00877217
1.09	-5.93803e-05	5.45	-0.0466814	5.45	-0.023653
1.1	-5.93581e-05	5.5	-0.0385334	5.5	-0.0195194
1.11	-5.9336e-05	5.55	0.0918344	5.55	0.0466175
1.12	-5.93141e-05	5.6	0.194499	5.6	0.0987004
1.13	-5.92923e-05	5.65	0.130945	5.65	0.0664586
1.14	-5.92707e-05	5.7	0.0869457	5.7	0.0441374
1.15	-5.92492e-05	5.75	0.0347985	5.75	0.0176826
1.16	-5.92278e-05	5.8	-0.00920061	5.8	-0.00463864
1.17	-5.92066e-05	5.85	-0.0222374	5.85	-0.0112523
1.18	-5.91855e-05	5.9	-0.0254966	5.9	-0.0129058
1.19	-5.91645e-05	5.95	-0.00757101	5.95	-0.00381194
1.2	-5.91437e-05	6	0.00546577	6	0.00280175
1.21	-5.9123e-05	6.05	-0.0271262	6.05	-0.0137325
1.22	-5.91024e-05	6.1	0.00709537	6.1	0.00362846
1.23	-5.9082e-05	6.15	0.0592425	6.15	0.0300832
1.24	-5.90616e-05	6.2	0.0152434	6.2	0.00776202
1.25	-5.90414e-05	6.25	0.0347985	6.25	0.0176826
1.26	-5.90214e-05	6.3	0.0771681	6.3	0.0391771
1.27	-5.90015e-05	6.35	0.0885753	6.35	0.0449641
1.28	-5.89816e-05	6.4	0.0853161	6.4	0.0433106
1.29	-5.8962e-05	6.45	0.0804273	6.45	0.0408305
1.3	-5.89424e-05	6.5	0.0103546	6.5	0.00528187
1.31	-5.8923e-05	6.55	-0.0580885	6.55	-0.02944
1.32	-5.89036e-05	6.6	-0.0694957	6.6	-0.035227
1.33	-5.88845e-05	6.65	0.0950937	6.65	0.0482709
1.34	-5.88654e-05	6.7	0.184722	6.7	0.0937401
1.35	-5.88464e-05	6.75	0.170055	6.75	0.0862997
1.36	-5.88276e-05	6.8	0.0233914	6.8	0.0118956
1.37	-5.88089e-05	6.85	-0.113495	6.85	-0.0575483
1.38	-5.87903e-05	6.9	-0.144457	6.9	-0.0732558
1.39	-5.87718e-05	6.95	-0.0597181	6.95	-0.0302668
1.4	-5.87534e-05	7	0.00872496	7	0.00445513
1.41	-5.87352e-05	7.05	0.0396873	7.05	0.0201627
1.42	-5.8717e-05	7.1	0.0396873	7.1	0.0201627
1.43	-5.8699e-05	7.15	0.0592425	7.15	0.0300832
1.44	-5.86811e-05	7.2	0.0266506	7.2	0.013549
1.45	-5.86633e-05	7.25	0.0119842	7.25	0.00610855
1.46	-5.86456e-05	7.3	-0.0124598	7.3	-0.00629213
1.47	-5.86281e-05	7.35	-0.0336446	7.35	-0.0170394
1.48	-5.86106e-05	7.4	0.0152434	7.4	0.00776197
1.49	-5.85932e-05	7.45	0.0527241	7.45	0.0267764
1.5	-5.8576e-05	7.5	0.0185026	7.5	0.00941539
1.51	-5.85588e-05	7.55	-0.00920061	7.55	-0.00463872
1.52	-5.85418e-05	7.6	-0.0499405	7.6	-0.0253065
1.53	-5.85249e-05	7.65	-0.0124598	7.65	-0.00629215
1.54	-5.85081e-05	7.7	-0.0206078	7.7	-0.0104257
1.55	-5.84914e-05	7.75	0.0641313	7.75	0.0325633
1.56	-5.84747e-05	7.8	0.10976	7.8	0.0557113
1.57	-5.84582e-05	7.85	0.0413169	7.85	0.0209894
1.58	-5.84418e-05	7.9	-0.0678661	7.9	-0.0344004
1.59	-5.84255e-05	7.95	-0.177049	7.95	-0.0897901
1.6	-5.84093e-05	8	-0.147716	8	-0.0749093
1.61	-5.83932e-05	8.05	-0.00757101	8.05	-0.00381201
1.62	-5.83772e-05	8.1	0.0950936	8.1	0.0482708
1.63	-5.83614e-05	8.15	0.10976	8.15	0.0557113
1.64	-5.83456e-05	8.2	0.11139	8.2	0.056538
1.65	-5.83299e-05	8.25	0.122797	8.25	0.062325
1.66	-5.83143e-05	8.3	0.0739089	8.3	0.0375236
1.67	-5.82988e-05	8.35	-0.0678661	8.35	-0.0344004
1.68	-5.82833e-05	8.4	-0.0809029	8.4	-0.0410141
1.69	-5.8268e-05	8.45	-0.023867	8.45	-0.0120791
1.7	-5.82528e-05	8.5	0.0576129	8.5	0.0292565
1.71	-5.82377e-05	8.55	0.0739089	8.55	0.0375236
1.72	-5.82227e-05	8.6	0.0136138	8.6	0.00693524
1.73	-5.82077e-05	8.65	-0.0580885	8.65	-0.0294401
1.74	-5.81929e-05	8.7	-0.0564589	8.7	-0.0286134
1.75	-5.81782e-05	8.75	0.00546577	8.75	0.00280168
1.76	-5.81635e-05	8.8	0.00383617	8.8	0.00197496
1.77	-5.81489e-05	8.85	0.0771681	8.85	0.039177
1.78	-5.81345e-05	8.9	0.121167	8.9	0.0614982
1.79	-5.81201e-05	8.95	0.129315	8.95	0.0656318
1.8	-5.81058e-05	9	0.101612	9	0.0515777
1.81	-5.80916e-05	9.05	0.0527241	9.05	0.0267763
1.82	-5.80775e-05	9.1	-0.015719	9.1	-0.00794559
1.83	-5.80634e-05	9.15	-0.0613477	9.15	-0.0310935
1.84	-5.80495e-05	9.2	-0.0450518	9.2	-0.0228264
1.85	-5.80356e-05	9.25	-0.00920061	9.25	-0.00463874
1.86	-5.80219e-05	9.3	-0.0483109	9.3	-0.0244798
1.87	-5.80082e-05	9.35	-0.0646069	9.35	-0.0327469
1.88	-5.79946e-05	9.4	0.0136138	9.4	0.00693523
1.89	-5.79811e-05	9.45	0.0543537	9.45	0.027603
1.9	-5.79677e-05	9.5	0.0543537	9.5	0.027603
1.91	-5.79543e-05	9.55	0.0804273	9.55	0.0408304
1.92	-5.7941e-05	9.6	0.0804273	9.6	0.0408304
1.93	-5.79279e-05	9.65	0.0967233	9.65	0.0490976
1.94	-5.79148e-05	9.7	0.0804273	9.7	0.0408304
1.95	-5.79017e-05	9.75	-0.00268221	9.75	-0.00133189
1.96	-5.78888e-05	9.8	-0.0450518	9.8	-0.0228264
1.97	-5.7876e-05	9.85	-0.0597181	9.85	-0.0302668
1.98	-5.78632e-05	9.9	0.0331689	9.9	0.0168558
1.99	-5.78505e-05	9.95	0.103242	9.95	0.0524044
2	-5.78379e-05	10	0.0983529	10	0.0499243
2.01	-5.78253e-05	10.05	0.0918344	10.05	0.0466174
2.02	-5.78129e-05	10.1	0.122797	10.1	0.062325
2.03	-5.78005e-05	10.15	0.0608722	10.15	0.0309255
2.04	-5.77882e-05	10.2	-0.0124599	10.2	-0.0062115
2.05	-5.77759e-05	10.25	-0.00920079	10.25	-0.0044431
2.06	-5.77638e-05	10.3	-0.00268231	10.3	-0.000954364
2.07	-5.77517e-05	10.35	0.0494647	10.35	0.0257663
2.08	-5.77397e-05	10.4	0.153759	10.4	0.079043
2.09	-5.77278e-05	10.45	0.163537	10.45	0.0844879
2.1	-5.77159e-05	10.5	0.057613	10.5	0.0313692
2.11	-5.77041e-05	10.55	-0.0140893	10.55	-0.00424122
2.12	-5.76924e-05	10.6	-0.0254966	10.6	-0.00910318
2.13	-5.76808e-05	10.65	0.049465	10.65	0.0300223
2.14	-5.76692e-05	10.7	0.130945	10.7	0.0726359
2.15	-5.76577e-05	10.75	0.117908	10.75	0.0674902
2.16	-5.76463e-05	10.8	0.0462057	10.8	0.0327792
2.17	-5.76349e-05	10.85	0.0559833	10.85	0.0396054
2.18	-5.76237e-05	10.9	0.116278	10.9	0.0722651
2.19	-5.76124e-05	10.95	0.0690201	10.95	0.0505694
2.2	-5.76013e-05	11	-0.00594141	11	0.0150282
2.21	-5.75902e-05	11.05	-0.0743845	11.05	-0.016998
2.22	-5.75792e-05	11.1	-0.123273	11.1	-0.0388968
2.23	-5.75683e-05	11.15	-0.183568	11.15	-0.0663783
2.24	-5.75574e-05	11.2	-0.0825325	11.2	-0.0118146
2.25	-5.75466e-05	11.25	-0.0711253	11.25	-0.00252372
2.26	-5.75359e-05	11.3	-0.17379	11.3	-0.0509115
2.27	-5.75252e-05	11.35	-0.164012	11.35	-0.0420709
2.28	-5.75146e-05	11.4	-0.146087	11.4	-0.0289178
2.29	-5.75041e-05	11.45	-0.13142	11.45	-0.0172463
2.3	-5.74936e-05	11.5	-0.0857917	11.5	0.0102972
2.31	-5.74832e-05	11.55	-0.121643	11.55	-0.00333831
2.32	-5.74728e-05	11.6	-0.209641	11.6	-0.0432799
2.33	-5.74625e-05	11.65	-0.164012	11.65	-0.0152909
2.34	-5.74523e-05	11.7	-0.056459	11.7	0.044245
2.35	-5.74422e-05	11.75	-0.0515702	11.75	0.0518212
2.36	-5.74321e-05	11.8	-0.0890509	11.8	0.0380176
2.37	-5.74221e-05	11.85	-0.129791	11.85	0.0226664
2.38	-5.74121e-05	11.9	-0.186827	11.9	-0.000854709
2.39	-5.74022e-05	11.95	-0.271566	11.95	-0.0383411
2.4	-5.73923e-05	12	-0.222678	12	-0.00795694
2.41	-5.73825e-05	12.05	-0.170531	12.05	0.0241526
2.42	-5.73728e-05	12.1	-0.152605	12.1	0.0389648
2.43	-5.73632e-05	12.15	-0.191716	12.15	0.0248979
2.44	-5.73536e-05	12.2	-0.21616	12.2	0.0183192
2.45	-5.7344e-05	12.25	-0.191716	12.25	0.0365823
2.46	-5.73345e-05	12.3	-0.21616	12.3	0.0300769
2.47	-5.73251e-05	12.35	-0.287862	12.35	-0.000377336
2.48	-5.73157e-05	12.4	-0.37749	12.4	-0.0399064
2.49	-5.73064e-05	12.45	-0.401934	12.45	-0.0463547
2.5	-5.72972e-05	12.5	-0.392156	12.5	-0.035436
2.51	-5.7288e-05	12.55	-0.341639	12.55	-0.00384954
2.52	-5.72788e-05	12.6	-0.300899	12.6	0.0227708
2.53	-5.72697e-05	12.65	-0.322083	12.65	0.0179646
2.54	-5.72607e-05	12.7	-0.305787	12.7	0.0321562
2.55	-5.72517e-05	12.75	-0.2129	12.75	0.0851816
2.56	-5.72428e-05	12.8	-0.297639	12.8	0.0480689
2.57	-5.7234e-05	12.85	-0.436155	12.85	-0.016356
2.58	-5.72251e-05	12.9	-0.480154	12.9	-0.0328668
2.59	-5.72164e-05	12.95	-0.423118	12.95	0.00183972
2.6	-5.72077e-05	13	-0.411711	13	0.0133555
2.61	-5.7199e-05	13.05	-0.470377	13.05	-0.0107234
2.62	-5.71905e-05	13.1	-0.49808	13.1	-0.0191442
2.63	-5.71819e-05	13.15	-0.45571	13.15	0.00793126
2.64	-5.71734e-05	13.2	-0.432896	13.2	0.025031
2.65	-5.7165e-05	13.25	-0.475266	13.25	0.00900467
2.66	-5.71566e-05	13.3	-0.57956	13.3	-0.0384968
2.67	-5.71483e-05	13.35	-0.605633	13.35	-0.0463783
2.68	-5.714e-05	13.4	-0.589337	13.4	-0.0328294
2.69	-5.71318e-05	13.45	-0.530672	13.45	0.00214813
2.7	-5.71236e-05	13.5	-0.506228	13.5	0.0196972
2.71	-5.71155e-05	13.55	-0.502969	13.55	0.0264301
2.72	-5.71074e-05	13.6	-0.511117	13.6	0.0273058
2.73	-5.70993e-05	13.65	-0.485043	13.65	0.0454712
2.74	-5.70914e-05	13.7	-0.472006	13.7	0.0569507
2.75	-5.70834e-05	13.75	-0.465488	13.75	0.0650503
2.76	-5.70755e-05	13.8	-0.535561	13.8	0.0342206
2.77	-5.70677e-05	13.85	-0.560005	13.85	0.0264646
2.78	-5.70599e-05	13.9	-0.626818	13.9	-0.00286068
2.79	-5.70522e-05	13.95	-0.628448	13.95	0.000807472
2.8	-5.70445e-05	14	-0.553486	14	0.0432558
2.81	-5.70369e-05	14.05	-0.569782	14.05	0.0393329
2.82	-5.70293e-05	14.1	-0.623559	14.1	0.0163202
2.83	-5.70217e-05	14.15	-0.621929	14.15	0.0213403
2.84	-5.70142e-05	14.2	-0.561634	14.2	0.0560469
2.85	-5.70067e-05	14.25	-0.612152	14.25	0.0344621
2.86	-5.69993e-05	14.3	-0.675706	14.3	0.00618888
2.87	-5.6992e-05	14.35	-0.636596	14.35	0.0299242
2.88	-5.69846e-05	14.4	-0.633337	14.4	0.0353981
2.89	-5.69774e-05	14.45	-0.672447	14.45	0.0193041
2.9	-5.69701e-05	14.5	-0.680595	14.5	0.0188447
2.91	-5.6963e-05	14.55	-0.625189	14.55	0.0505549
2.92	-5.69558e-05	14.6	-0.542079	14.6	0.0962476
2.93	-5.69487e-05	14.65	-0.587708	14.65	0.0765592
2.94	-5.69417e-05	14.7	-0.652892	14.7	0.0468799
2.95	-5.69346e-05	14.75	-0.696891	14.75	0.0278786
2.96	-5.69277e-05	14.8	-0.749038	14.8	0.00467506
2.97	-5.69207e-05	14.85	-0.804444	14.85	-0.0202497
2.98	-5.69139e-05	14.9	-0.768593	14.9	0.00105444
2.99	-5.6907e-05	14.95	-0.672447	14.95	0.0528808
3	-5.69002e-05	15	-0.716446	15	0.0335448
3.01	-5.68935e-05	15.05	-0.796296	15.05	-0.00404319
3.02	-5.68867e-05	15.1	-0.794667	15.1	-0.000358959
3.03	-5.68801e-05	15.15	-0.799556	15.15	-4.39721e-05
3.04	-5.68734e-05	15.2	-0.757186	15.2	0.0241842
3.05	-5.68668e-05	15.25	-0.752297	15.25	0.0293375
3.06	-5.68603e-05	15.3	-0.745779	15.3	0.0352579
3.07	-5.68538e-05	15.35	-0.762075	15.35	0.0295458
3.08	-5.68473e-05	15.4	-0.724594	15.4	0.0510577
3.09	-5.68409e-05	15.45	-0.687113	15.45	0.0725129
3.1	-5.68345e-05	15.5	-0.674077	15.5	0.0815118
3.11	-5.68281e-05	15.55	-0.765334	15.55	0.0375465
3.12	-5.68218e-05	15.6	-0.931553	15.6	-0.0445012
3.13	-5.68155e-05	15.65	-0.939701	15.65	-0.0464105
3.14	-5.68093e-05	15.7	-0.838666	15.7	0.00701817
3.15	-5.68031e-05	15.75	-0.744149	15.75	0.0570893
3.16	-5.67969e-05	15.8	-0.74252	15.8	0.0599881
3.17	-5.67908e-05	15.85	-0.773482	15.85	0.0463038
3.18	-5.67847e-05	15.9	-0.797926	15.9	0.0358785
3.19	-5.67787e-05	15.95	-0.814222	15.95	0.0295399
3.2	-5.67726e-05	16	-0.801185	16	0.0380362
3.21	-5.67667e-05	16.05	-0.73926	16.05	0.0712888
3.22	-5.67607e-05	16.1	-0.871258	16.1	0.00611847
3.23	-5.67548e-05	16.15	-0.923405	16.15	-0.0185861
3.24	-5.67489e-05	16.2	-0.877776	16.2	0.00626976
3.25	-5.67431e-05	16.25	-0.727853	16.25	0.0839937
3.26	-5.67373e-05	16.3	-0.731112	16.3	0.0839663
3.27	-5.67316e-05	16.35	-0.786519	16.35	0.0574444
3.28	-5.67258e-05	16.4	-0.78163	16.4	0.061472
3.29	-5.67201e-05	16.45	-0.799556	16.45	0.0538876
3.3	-5.67145e-05	16.5	-0.819111	16.5	0.0454394
3.31	-5.67089e-05	16.55	-0.858221	16.55	0.0270343
3.32	-5.67033e-05	16.6	-0.913627	16.6	0.00032659
3.33	-5.66977e-05	16.65	-0.926664	16.65	-0.0049213
3.34	-5.66922e-05	16.7	-0.938071	16.7	-0.00937649
3.35	-5.66867e-05	16.75	-0.982071	16.75	-0.0303991
3.36	-5.66813e-05	16.8	-0.972293	16.8	-0.0241727
3.37	-5.66759e-05	16.85	-0.867999	16.85	0.0299714
3.38	-5.66705e-05	16.9	-0.789778	16.9	0.0708571
3.39	-5.66651e-05	16.95	-0.854962	16.95	0.0389619
3.4	-5.66598e-05	17	-0.926664	17	0.00373026
3.41	-5.66545e-05	17.05	-0.854962	17.05	0.0412204
3.42	-5.66493e-05	17.1	-0.794667	17.1	0.0728954
3.43	-5.6644e-05	17.15	-0.884295	17.15	0.0284854
3.44	-5.66388e-05	17.2	-0.931553	17.2	0.00554299
3.45	-5.66337e-05	17.25	-0.848443	17.25	0.0487113
3.46	-5.66286e-05	17.3	-0.856591	17.3	0.0455581
3.47	-5.66235e-05	17.35	-0.969034	17.35	-0.0105297
3.48	-5.66184e-05	17.4	-0.996737	17.4	-0.0236528
3.49	-5.66134e-05	17.45	-0.972293	17.45	-0.010345
3.5	-5.66084e-05	17.5	-0.947849	17.5	0.00293961
3.51	-5.66034e-05	17.55	-0.926664	17.55	0.0145481
3.52	-5.65984e-05	17.6	-0.897331	17.6	0.030268
3.53	-5.65935e-05	17.65	-0.86474	17.65	0.0476197
3.54	-5.65886e-05	17.7	-0.897331	17.7	0.0318819
3.55	-5.65838e-05	17.75	-0.925035	17.75	0.0186037
3.56	-5.6579e-05	17.8	-0.951108	17.8	0.00613216
3.57	-5.65742e-05	17.85	-0.866369	17.85	0.0498575
3.58	-5.65694e-05	17.9	-0.78	17.9	0.0943905
3.59	-5.65647e-05	17.95	-0.789778	17.95	0.0901288
3.6	-5.656e-05	18	-0.882665	18	0.0436867
3.61	-5.65553e-05	18.05	-0.962515	18.05	0.00384064
3.62	-5.65506e-05	18.1	-1.03585	18.1	-0.0327158
3.63	-5.6546e-05	18.15	-1.00163	18.15	-0.0147261
3.64	-5.65414e-05	18.2	-0.895702	18.2	0.0396226
3.65	-5.65369e-05	18.25	-0.925035	18.25	0.0253382
3.66	-5.65323e-05	18.3	-1.01955	18.3	-0.0220303
3.67	-5.65278e-05	18.35	-1.05866	18.35	-0.0413057
3.68	-5.65233e-05	18.4	-1.03911	18.4	-0.0308343
3.69	-5.65189e-05	18.45	-0.960886	18.45	0.00938427
3.7	-5.65145e-05	18.5	-0.925035	18.5	0.0280944
3.71	-5.65101e-05	18.55	-0.908739	18.55	0.0368702
3.72	-5.65057e-05	18.6	-0.908739	18.6	0.0373655
3.73	-5.65013e-05	18.65	-0.925035	18.65	0.0295807
3.74	-5.6497e-05	18.7	-0.884295	18.7	0.0507182
3.75	-5.64927e-05	18.75	-0.918516	18.75	0.0338145
3.76	-5.64885e-05	18.8	-1.06192	18.8	-0.0384909
3.77	-5.64842e-05	18.85	-1.09125	18.85	-0.0529382
3.78	-5.648e-05	18.9	-1.00977	18.9	-0.0111805
3.79	-5.64758e-05	18.95	-0.898961	18.95	0.0454469
3.8	-5.64716e-05	19	-0.850073	19	0.0706484
3.81	-5.64675e-05	19.05	-0.938071	19.05	0.0263956
3.82	-5.64634e-05	19.1	-1.02281	19.1	-0.0162142
3.83	-5.64593e-05	19.15	-1.04888	19.15	-0.0290724
3.84	-5.64552e-05	19.2	-1.01792	19.2	-0.0130053
3.85	-5.64512e-05	19.25	-0.988589	19.25	0.00222542
3.86	-5.64472e-05	19.3	-1.02118	19.3	-0.0139681
3.87	-5.64432e-05	19.35	-1.06518	19.35	-0.0359576
3.88	-5.64392e-05	19.4	-1.01303	19.4	-0.00917999
3.89	-5.64353e-05	19.45	-0.946219	19.45	0.0250295
3.9	-5.64314e-05	19.5	-0.934812	19.5	0.0311225
3.91	-5.64275e-05	19.55	-1.01303	19.55	-0.00826183
3.92	-5.64236e-05	19.6	-1.05866	19.6	-0.0311198
3.93	-5.64198e-05	19.65	-1.09451	19.65	-0.0490252
3.94	-5.64159e-05	19.7	-1.10266	19.7	-0.0528841
3.95	-5.64121e-05	19.75	-1.06029	19.75	-0.0311221
3.96	-5.64084e-05	19.8	-1.00977	19.8	-0.00523367
3.97	-5.64046e-05	19.85	-0.947849	19.85	0.0264348
3.98	-5.64009e-05	19.9	-0.928294	19.9	0.036602
3.99	-5.63972e-05	19.95	-0.996737	19.95	0.00212015
4	-5.63935e-05	20	-1.07496	20	-0.0373284
4.01	-5.63898e-05	20.05	-1.07659	20.05	-0.0379276
4.02	-5.63862e-05	20.1	-0.9837	20.1	0.00941638
4.03	-5.63826e-05	20.15	-0.970663	20.15	0.0162456
4.04	-5.6379e-05	20.2	-1.08636	20.2	-0.0422412
4.05	-5.63754e-05	20.25	-1.14503	20.25	-0.0717988
4.06	-5.63718e-05	20.3	-1.13199	20.3	-0.0649863
4.07	-5.63683e-05	20.35	-1.03422	20.35	-0.0151902
4.08	-5.63648e-05	20.4	-0.975552	20.4	0.0147597
4.09	-5.63613e-05	20.45	-0.957627	20.45	0.0240367
4.1	-5.63579e-05	20.5	-1.03585	20.5	-0.0154671
4.11	-5.63544e-05	20.55	-1.0554	20.55	-0.0252142
4.12	-5.6351e-05	20.6	-0.982071	20.6	0.0121568
4.13	-5.63476e-05	20.65	-1.01955	20.65	-0.00669321
4.14	-5.63442e-05	20.7	-1.05377	20.7	-0.0238942
4.15	-5.63408e-05	20.75	-1.02444	20.75	-0.00885763
4.16	-5.63375e-05	20.8	-1.00977	20.8	-0.00126566
4.17	-5.63342e-05	20.85	-1.02118	20.85	-0.00690517
4.18	-5.63309e-05	20.9	-1.06192	20.9	-0.0274294
4.19	-5.63276e-05	20.95	-1.13036	20.95	-0.0620117
4.2	-5.63243e-05	21	-1.15481	21	-0.0742764
4.21	-5.63211e-05	21.05	-1.11733	21.05	-0.0551297
4.22	-5.63179e-05	21.1	-1.05377	21.1	-0.0227592
4.23	-5.63147e-05	21.15	-1.06844	21.15	-0.0300743
4.24	-5.63115e-05	21.2	-1.02933	21.2	-0.0101112
4.25	-5.63083e-05	21.25	-1.0277	21.25	-0.00916581
4.26	-5.63052e-05	21.3	-1.06681	21.3	-0.0288914
4.27	-5.6302e-05	21.35	-1.05703	21.35	-0.0238187
4.28	-5.62989e-05	21.4	-1.01955	21.4	-0.00469495
4.29	-5.62959e-05	21.45	-0.858221	21.45	0.0772561
4.3	-5.62928e-05	21.5	-0.846814	21.5	0.0831467
4.31	-5.62897e-05	21.55	-0.925035	21.55	0.0435653
4.32	-5.62867e-05	21.6	-1.06029	21.6	-0.0249537
4.33	-5.62837e-05	21.65	-1.11244	21.65	-0.051313
4.34	-5.62807e-05	21.7	-1.00326	21.7	0.00416958
4.35	-5.62777e-05	21.75	-0.972293	21.75	0.0199675
4.36	-5.62748e-05	21.8	-1.0277	21.8	-0.00805268
4.37	-5.62718e-05	21.85	-1.08962	21.85	-0.0393821
4.38	-5.62689e-05	21.9	-1.14666	21.9	-0.0682337
4.39	-5.6266e-05	21.95	-1.13688	21.95	-0.0631923
4.4	-5.62631e-05	22	-1.05866	22	-0.0234312
4.41	-5.62602e-05	22.05	-1.00163	22.05	0.00558049
4.42	-5.62574e-05	22.1	-0.98533	22.1	0.0139223
4.43	-5.62545e-05	22.15	-1.01466	22.15	-0.00088577
4.44	-5.62517e-05	22.2	-1.03748	22.2	-0.012389
4.45	-5.62489e-05	22.25	-1.05866	22.25	-0.0230673
4.46	-5.62461e-05	22.3	-1.07659	22.3	-0.0320942
4.47	-5.62434e-05	22.35	-1.06029	22.35	-0.0237618
4.48	-5.62406e-05	22.4	-1.03585	22.4	-0.0112977
4.49	-5.62379e-05	22.45	-1.06029	22.45	-0.0236366
4.5	-5.62352e-05	22.5	-1.06681	22.5	-0.0268834
4.51	-5.62325e-05	22.55	-1.00488	22.55	0.00459018
4.52	-5.62298e-05	22.6	-0.957627	22.6	0.0286217
4.53	-5.62271e-05	22.65	-0.881035	22.65	0.0675326
4.54	-5.62245e-05	22.7	-0.908739	22.7	0.0535324
4.55	-5.62218e-05	22.75	-1.04725	22.75	-0.0166858
4.56	-5.62192e-05	22.8	-1.10266	22.8	-0.044743
4.57	-5.62166e-05	22.85	-1.06518	22.85	-0.0256789
4.58	-5.6214e-05	22.9	-0.972293	22.9	0.021492
4.59	-5.62115e-05	22.95	-0.946219	22.95	0.0347664
4.6	-5.62089e-05	23	-1.07333	23	-0.0296714
4.61	-5.62064e-05	23.05	-1.17436	23.05	-0.080883
4.62	-5.62038e-05	23.1	-1.12548	23.1	-0.0560383
4.63	-5.62013e-05	23.15	-0.998367	23.15	0.00848734
4.64	-5.61988e-05	23.2	-0.972293	23.2	0.0217558
4.65	-5.61964e-05	23.25	-1.04562	23.25	-0.0154064
4.66	-5.61939e-05	23.3	-1.15807	23.3	-0.0724107
4.67	-5.61915e-05	23.35	-1.10918	23.35	-0.0475715
4.68	-5.6189e-05	23.4	-0.946219	23.4	0.0351365
4.69	-5.61866e-05	23.45	-1.00326	23.45	0.00623733
4.7	-5.61842e-05	23.5	-1.10429	23.5	-0.044984
4.71	-5.61818e-05	23.55	-1.08962	23.55	-0.0375097
4.72	-5.61794e-05	23.6	-1.08962	23.6	-0.0374767
4.73	-5.61771e-05	23.65	-1.08636	23.65	-0.0357912
4.74	-5.61747e-05	23.7	-1.03259	23.7	-0.00847848
4.75	-5.61724e-05	23.75	-1.05866	23.75	-0.0216755
4.76	-5.61701e-05	23.8	-1.15481	23.8	-0.070422
4.77	-5.61678e-05	23.85	-1.15318	23.85	-0.0695665
4.78	-5.61655e-05	23.9	-1.09777	23.9	-0.0414303
4.79	-5.61632e-05	23.95	-1.09288	23.95	-0.0389229
4.8	-5.61609e-05	24	-1.15481	24	-0.0703115
4.81	-5.61587e-05	24.05	-1.14014	24.05	-0.0628453
4.82	-5.61565e-05	24.1	-1.03748	24.1	-0.0107373
4.83	-5.61542e-05	24.15	-1.01629	24.15	3.43527e-05
4.84	-5.6152e-05	24.2	-1.03911	24.2	-0.0115159
4.85	-5.61498e-05	24.25	-1.02444	24.25	-0.00405234
4.86	-5.61476e-05	24.3	-1.05703	24.3	-0.0205641
4.87	-5.61455e-05	24.35	-1.044	24.35	-0.0139285
4.88	-5.61433e-05	24.4	-1.00814	24.4	0.00428046
4.89	-5.61412e-05	24.45	-1.08799	24.45	-0.0362077
4.9	-5.61391e-05	24.5	-1.07659	24.5	-0.0304006
4.91	-5.61369e-05	24.55	-1.05377	24.55	-0.018807
4.92	-5.61348e-05	24.6	-1.10592	24.6	-0.0452427
4.93	-5.61327e-05	24.65	-1.13525	24.65	-0.0601049
4.94	-5.61307e-05	24.7	-1.15807	24.7	-0.0716608
4.95	-5.61286e-05	24.75	-1.11244	24.75	-0.0484953
4.96	-5.61266e-05	24.8	-1.00488	24.8	0.00608485
4.97	-5.61245e-05	24.85	-0.957627	24.85	0.0300762
4.98	-5.61225e-05	24.9	-1.00326	24.9	0.00694443
4.99	-5.61205e-05	24.95	-1.06518	24.95	-0.0244549
5	-5.61185e-05	25	-1.11407	25	-0.0492409
5.01	-5.61165e-05	25.05	-1.09777	25.05	-0.0409588
5.02	-5.61145e-05	25.1	-1.08962	25.1	-0.0368107
5.03	-5.61125e-05	25.15	-1.01792	25.15	-0.000421223
5.04	-5.61106e-05	25.2	-1.03911	25.2	-0.0111547
5.05	-5.61086e-05	25.25	-1.00977	25.25	0.00373943
5.06	-5.61067e-05	25.3	-1.03911	25.3	-0.0111283
5.07	-5.61048e-05	25.35	-1.19392	25.35	-0.0896533
5.08	-5.61029e-05	25.4	-1.20207	25.4	-0.0937746
5.09	-5.6101e-05	25.45	-1.03259	25.45	-0.00778453
5.1	-5.60991e-05	25.5	-0.934812	25.5	0.0418299
5.11	-5.60972e-05	25.55	-1.00163	25.55	0.00794607
5.12	-5.60954e-05	25.6	-1.04725	25.6	-0.0151908
5.13	-5.60935e-05	25.65	-1.05703	25.65	-0.0201404
5.14	-5.60917e-05	25.7	-1.09614	25.7	-0.039971
5.15	-5.60898e-05	25.75	-1.10266	25.75	-0.0432676
5.16	-5.6088e-05	25.8	-1.12385	25.8	-0.054005
5.17	-5.60862e-05	25.85	-1.15318	25.85	-0.0688762
5.18	-5.60844e-05	25.9	-1.14666	25.9	-0.0655599
5.19	-5.60826e-05	25.95	-1.08799	25.95	-0.0357891
5.2	-5.60809e-05	26	-1.0277	26	-0.00519192
5.21	-5.60791e-05	26.05	-1.01792	26.05	-0.000223007
5.22	-5.60773e-05	26.1	-1.06355	26.1	-0.0233625
5.23	-5.60756e-05	26.15	-1.10429	26.15	-0.0440222
5.24	-5.60739e-05	26.2	-1.13199	26.2	-0.0580683
5.25	-5.60722e-05	26.25	-1.2151	26.25	-0.100223
5.26	-5.60704e-05	26.3	-1.14829	26.3	-0.0663201
5.27	-5.60687e-05	26.35	-1.05051	26.35	-0.0167101
5.28	-5.60671e-05	26.4	-0.970663	26.4	0.0238059
5.29	-5.60654e-05	26.45	-0.970663	26.45	0.0238129
5.3	-5.60637e-05	26.5	-1.03585	26.5	-0.0092488
5.31	-5.6062e-05	26.55	-1.04074	26.55	-0.0117223
5.32	-5.60604e-05	26.6	-1.00977	26.6	0.00399157
5.33	-5.60588e-05	26.65	-0.957627	26.65	0.0304526
5.34	-5.60571e-05	26.7	-0.969034	26.7	0.0246717
5.35	-5.60555e-05	26.75	-1.01466	26.75	0.00152962
5.36	-5.60539e-05	26.8	-1.03422	26.8	-0.00838522
5.37	-5.60523e-05	26.85	-1.00814	26.85	0.00484779
5.38	-5.60507e-05	26.9	-1.00163	26.9	0.00816004
5.39	-5.60491e-05	26.95	-0.988589	26.95	0.014779
5.4	-5.60476e-05	27	-1.08962	27	-0.036472
5.41	-5.6046e-05	27.05	-1.13199	27.05	-0.0579615
5.42	-5.60444e-05	27.1	-1.13362	27.1	-0.0587834
5.43	-5.60429e-05	27.15	-1.044	27.15	-0.0133095
5.44	-5.60414e-05	27.2	-1.00326	27.2	0.00736296
5.45	-5.60398e-05	27.25	-1.00977	27.25	0.00406059
5.46	-5.60383e-05	27.3	-1.01955	27.3	-0.000895283
5.47	-5.60368e-05	27.35	-1.00488	27.35	0.00654937
5.48	-5.60353e-05	27.4	-0.9837	27.4	0.0173007
5.49	-5.60338e-05	27.45	-1.01629	27.45	0.000770524
5.5	-5.60324e-05	27.5	-1.09125	27.5	-0.0372544
5.51	-5.60309e-05	27.55	-1.13199	27.55	-0.0579183
5.52	-5.60294e-05	27.6	-1.10755	27.6	-0.0455139
5.53	-5.6028e-05	27.65	-1.04562	27.65	-0.0140953
5.54	-5.60265e-05	27.7	-0.990218	27.7	0.0140165
5.55	-5.60251e-05	27.75	-0.951108	27.75	0.0338609
5.56	-5.60237e-05	27.8	-0.967404	27.8	0.0255971
5.57	-5.60223e-05	27.85	-1.00163	27.85	0.00823942
5.58	-5.60209e-05	27.9	-1.0114	27.9	0.00328226
5.59	-5.60195e-05	27.95	-1.02933	27.95	-0.00580852
5.6	-5.60181e-05	28	-1.02607	28	-0.00415206
5.61	-5.60167e-05	28.05	-1.04725	28.05	-0.0148965
5.62	-5.60153e-05	28.1	-1.0717	28.1	-0.0272943
5.63	-5.6014e-05	28.15	-1.03259	28.15	-0.00745046
5.64	-5.60126e-05	28.2	-1.03259	28.2	-0.00744779
5.65	-5.60112e-05	28.25	-1.06355	28.25	-0.0231527
5.66	-5.60099e-05	28.3	-1.14992	28.3	-0.0669659
5.67	-5.60086e-05	28.35	-1.13199	28.35	-0.0578697
5.68	-5.60072e-05	28.4	-1.08474	28.4	-0.0338927
5.69	-5.60059e-05	28.45	-1.04725	28.45	-0.0148759
5.7	-5.60046e-05	28.5	-1.08148	28.5	-0.0322346
5.71	-5.60033e-05	28.55	-1.08636	28.55	-0.0347126
5.72	-5.6002e-05	28.6	-1.01466	28.6	0.00166491
5.73	-5.60007e-05	28.65	-1.03422	28.65	-0.00825354
5.74	-5.59995e-05	28.7	-1.07659	28.7	-0.0297461
5.75	-5.59982e-05	28.75	-1.13851	28.75	-0.0611592
5.76	-5.59969e-05	28.8	-1.14666	28.8	-0.0652908
5.77	-5.59957e-05	28.85	-1.07007	28.85	-0.0264334
5.78	-5.59944e-05	28.9	-1.04237	28.9	-0.0123775
5.79	-5.59932e-05	28.95	-1.04074	28.95	-0.011549
5.8	-5.5992e-05	29	-1.0554	29	-0.0189877
5.81	-5.59907e-05	29.05	-1.09125	29.05	-0.0371737
5.82	-5.59895e-05	29.1	-1.05377	29.1	-0.0181577
5.83	-5.59883e-05	29.15	-0.998367	29.15	0.00995212
5.84	-5.59871e-05	29.2	-0.996737	29.2	0.0107804
5.85	-5.59859e-05	29.25	-1.05703	29.25	-0.0198065
5.86	-5.59847e-05	29.3	-1.14992	29.3	-0.0669276
5.87	-5.59835e-05	29.35	-1.1597	29.35	-0.0718864
5.88	-5.59824e-05	29.4	-1.10266	29.4	-0.0429501
5.89	-5.59812e-05	29.45	-1.03748	29.45	-0.00988032
5.9	-5.59801e-05	29.5	-0.999996	29.5	0.00913536
5.91	-5.59789e-05	29.55	-1.0277	29.55	-0.00491745
5.92	-5.59778e-05	29.6	-1.01466	29.6	0.00169747
5.93	-5.59766e-05	29.65	-1.02444	29.65	-0.00326158
5.94	-5.59755e-05	29.7	-0.990218	29.7	0.0141006
5.95	-5.59744e-05	29.75	-0.94296	29.75	0.0380763
5.96	-5.59732e-05	29.8	-1.02607	29.8	-0.00408489
5.97	-5.59721e-05	29.85	-1.02118	29.85	-0.00160363
5.98	-5.5971e-05	29.9	-1.06029	29.9	-0.0214437
5.99	-5.59699e-05	29.95	-1.04074	29.95	-0.0115221
6	-5.59688e-05	30	-1.07822	30	-0.0305355
6.01	-5.59678e-05	30.05	-1.21347	30.05	-0.0991516
6.02	-5.59667e-05	30.1	-1.47258	30.1	-0.230598
6.03	-5.59656e-05	30.15	-1.71865	30.15	0.128111
6.04	-5.59645e-05	30.2	-1.79198	30.2	-0.0152055
6.05	-5.59635e-05	30.25	-1.69095	30.25	-0.0585992
6.06	-5.59624e-05	30.3	-1.5508	30.3	-0.0719422
6.07	-5.59614e-05	30.35	-1.40577	30.35	-0.0737116
6.08	-5.59603e-05	30.4	-1.28029	30.4	-0.0773013
6.09	-5.59593e-05	30.45	-1.21184	30.45	-0.102609
6.1	-5.59583e-05	30.5	-1.27214	30.5	-0.186796
6.11	-5.59573e-05	30.55	-1.24118	30.55	-0.218956
6.12	-5.59563e-05	30.6	-1.13199	30.6	-0.206325
6.13	-5.59552e-05	30.65	-0.960886	30.65	-0.157724
6.14	-5.59542e-05	30.7	-0.936442	30.7	-0.179465
6.15	-5.59533e-05	30.75	-0.897331	30.75	-0.190144
6.16	-5.59523e-05	30.8	-0.887554	30.8	-0.212473
6.17	-5.59513e-05	30.85	-0.856591	30.85	-0.221172
6.18	-5.59503e-05	30.9	-0.835407	30.9	-0.232258
6.19	-5.59493e-05	30.95	-0.869628	30.95	-0.269156
6.2	-5.59484e-05	31	-0.938071	31	-0.321366
6.21	-5.59474e-05	31.05	-0.952738	31.05	-0.344463
6.22	-5.59464e-05	31.1	-0.898961	31.1	-0.331204
6.23	-5.59455e-05	31.15	-0.824	31.15	-0.305737
6.24	-5.59446e-05	31.2	-0.838666	31.2	-0.324434
6.25	-5.59436e-05	31.25	-0.775112	31.25	-0.302283
6.26	-5.59427e-05	31.3	-0.788148	31.3	-0.317945
6.27	-5.59418e-05	31.35	-0.799555	31.35	-0.331848
6.28	-5.59408e-05	31.4	-0.765334	31.4	-0.321769
6.29	-5.59399e-05	31.45	-0.766964	31.45	-0.329131
6.3	-5.5939e-05	31.5	-0.78163	31.5	-0.34244
6.31	-5.59381e-05	31.55	-0.692002	31.55	-0.302242
6.32	-5.59372e-05	31.6	-0.582819	31.6	-0.251589
6.33	-5.59363e-05	31.65	-0.504598	31.65	-0.216164
6.34	-5.59354e-05	31.7	-0.542079	31.7	-0.239006
6.35	-5.59346e-05	31.75	-0.66104	31.75	-0.302799
6.36	-5.59337e-05	31.8	-0.667558	31.8	-0.309204
6.37	-5.59328e-05	31.85	-0.639855	31.85	-0.297939
6.38	-5.59319e-05	31.9	-0.581189	31.9	-0.270689
6.39	-5.59311e-05	31.95	-0.53719	31.95	-0.250631
6.4	-5.59302e-05	32	-0.514376	32	-0.241097
6.41	-5.59294e-05	32.05	-0.527413	32.05	-0.24955
6.42	-5.59285e-05	32.1	-0.548597	32.1	-0.261957
6.43	-5.59277e-05	32.15	-0.582819	32.15	-0.280816
6.44	-5.59269e-05	32.2	-0.551857	32.2	-0.26646
6.45	-5.5926e-05	32.25	-0.488302	32.25	-0.23544
6.46	-5.59252e-05	32.3	-0.533931	32.3	-0.259692
6.47	-5.59244e-05	32.35	-0.610522	32.35	-0.299546
6.48	-5.59236e-05	32.4	-0.535561	32.4	-0.26242
6.49	-5.59228e-05	32.45	-0.449192	32.45	-0.219422
6.5	-5.5922e-05	32.5	-0.493191	32.5	-0.242483
6.51	-5.59211e-05	32.55	-0.545338	32.55	-0.269608
6.52	-5.59204e-05	32.6	-0.530672	32.6	-0.262776
6.53	-5.59196e-05	32.65	-0.390526	32.65	-0.19223
6.54	-5.59188e-05	32.7	-0.340009	32.7	-0.167102
6.55	-5.5918e-05	32.75	-0.372601	32.75	-0.18409
6.56	-5.59172e-05	32.8	-0.302528	32.8	-0.148954
6.57	-5.59164e-05	32.85	-0.312306	32.85	-0.154289
6.58	-5.59157e-05	32.9	-0.317195	32.9	-0.15711
6.59	-5.59149e-05	32.95	-0.307417	32.95	-0.152461
6.6	-5.59142e-05	33	-0.333491	33	-0.16597
6.61	-5.59134e-05	33.05	-0.392156	33.05	-0.195989
6.62	-5.59127e-05	33.1	-0.4166	33.1	-0.208625
6.63	-5.59119e-05	33.15	-0.33512	33.15	-0.167503
6.64	-5.59112e-05	33.2	-0.258529	33.2	-0.128843
6.65	-5.59104e-05	33.25	-0.268307	33.25	-0.133982
6.66	-5.59097e-05	33.3	-0.269936	33.3	-0.134971
6.67	-5.5909e-05	33.35	-0.266677	33.35	-0.133467
6.68	-5.59083e-05	33.4	-0.33512	33.4	-0.168325
6.69	-5.59075e-05	33.45	-0.326972	33.45	-0.164316
6.7	-5.59068e-05	33.5	-0.245492	33.5	-0.123095
6.71	-5.59061e-05	33.55	-0.232455	33.55	-0.116586
6.72	-5.59054e-05	33.6	-0.271566	33.6	-0.136523
6.73	-5.59047e-05	33.65	-0.229196	33.65	-0.115117
6.74	-5.5904e-05	33.7	-0.170531	33.7	-0.0854362
6.75	-5.59033e-05	33.75	-0.162383	33.75	-0.0813771
6.76	-5.59026e-05	33.8	-0.263418	33.8	-0.132702
6.77	-5.5902e-05	33.85	-0.326972	33.85	-0.165007
6.78	-5.59013e-05	33.9	-0.317195	33.9	-0.160104
6.79	-5.59006e-05	33.95	-0.260159	33.95	-0.131223
6.8	-5.58999e-05	34	-0.194975	34	-0.0982037
6.81	-5.58993e-05	34.05	-0.162383	34.05	-0.0817149
6.82	-5.58986e-05	34.1	-0.141198	34.1	-0.0710097
6.83	-5.58979e-05	34.15	-0.137939	34.15	-0.0693951
6.84	-5.58973e-05	34.2	-0.190086	34.2	-0.0958857
6.85	-5.58966e-05	34.25	-0.232456	34.25	-0.117414
6.86	-5.5896e-05	34.3	-0.29438	34.3	-0.148859
6.87	-5.58954e-05	34.35	-0.260159	34.35	-0.131527
6.88	-5.58947e-05	34.4	-0.21616	34.4	-0.109232
6.89	-5.58941e-05	34.45	-0.21616	34.45	-0.109257
6.9	-5.58934e-05	34.5	-0.273195	34.5	-0.138214
6.91	-5.58928e-05	34.55	-0.282973	34.55	-0.143196
6.92	-5.58922e-05	34.6	-0.181938	34.6	-0.0919592
6.93	-5.58916e-05	34.65	-0.0140894	34.65	-0.00682614
6.94	-5.5891e-05	34.7	0.0136137	34.7	0.00721093
6.95	-5.58903e-05	34.75	-0.0727549	34.75	-0.0366207
6.96	-5.58897e-05	34.8	-0.198234	34.8	-0.100292
6.97	-5.58891e-05	34.85	-0.193345	34.85	-0.097826
6.98	-5.58885e-05	34.9	-0.150976	34.9	-0.0763443
6.99	-5.58879e-05	34.95	-0.0792733	34.95	-0.039981
7	-5.58873e-05	35	-0.0369038	35	-0.0184978
7.01	-5.58867e-05	35.05	-0.0629773	35.05	-0.0317357
7.02	-5.58862e-05	35.1	-0.129791	35.1	-0.0656408
7.03	-5.58856e-05	35.15	-0.232456	35.15	-0.117733
7.04	-5.5885e-05	35.2	-0.196604	35.2	-0.0995538
7.05	-5.58844e-05	35.25	-0.120013	35.25	-0.0607065
7.06	-5.58838e-05	35.3	-0.159124	35.3	-0.0805552
7.07	-5.58833e-05	35.35	-0.240603	35.35	-0.121898
7.08	-5.58827e-05	35.4	-0.230826	35.4	-0.116944
7.09	-5.58821e-05	35.45	-0.159124	35.45	-0.0805754
7.1	-5.58816e-05	35.5	-0.0890509	35.5	-0.0450327
7.11	-5.5881e-05	35.55	-0.0580885	35.55	-0.0293307
7.12	-5.58805e-05	35.6	-0.0515701	35.6	-0.0260292
7.13	-5.58799e-05	35.65	-0.0825325	35.65	-0.0417417
7.14	-5.58794e-05	35.7	-0.111865	35.7	-0.0566272
7.15	-5.58788e-05	35.75	-0.263418	35.75	-0.133516
7.16	-5.58783e-05	35.8	-0.37749	35.8	-0.19139
7.17	-5.58778e-05	35.85	-0.309047	35.85	-0.156672
7.18	-5.58772e-05	35.9	-0.225937	35.9	-0.114513
7.19	-5.58767e-05	35.95	-0.21453	35.95	-0.10873
7.2	-5.58762e-05	36	-0.219419	36	-0.111213
7.21	-5.58757e-05	36.05	-0.128161	36.05	-0.0649206
7.22	-5.58751e-05	36.1	-0.120013	36.1	-0.06079
7.23	-5.58746e-05	36.15	-0.13305	36.15	-0.0674066
7.24	-5.58741e-05	36.2	-0.115124	36.2	-0.0583154
7.25	-5.58736e-05	36.25	-0.167272	36.25	-0.0847728
7.26	-5.58731e-05	36.3	-0.177049	36.3	-0.0897355
7.27	-5.58726e-05	36.35	-0.13468	36.35	-0.0682432
7.28	-5.58721e-05	36.4	-0.103717	36.4	-0.0525379
7.29	-5.58716e-05	36.45	-0.206382	36.45	-0.104623
7.3	-5.58711e-05	36.5	-0.302528	36.5	-0.153401
7.31	-5.58706e-05	36.55	-0.326972	36.55	-0.165803
7.32	-5.58701e-05	36.6	-0.201493	36.6	-0.102148
7.33	-5.58696e-05	36.65	-0.0417925	36.65	-0.0211323
7.34	-5.58691e-05	36.7	-0.0662365	36.7	-0.0335346
7.35	-5.58686e-05	36.75	-0.0711253	36.75	-0.0360163
7.36	-5.58682e-05	36.8	-0.0629773	36.8	-0.0318842
7.37	-5.58677e-05	36.85	-0.167272	36.85	-0.0847952
7.38	-5.58672e-05	36.9	-0.247122	36.9	-0.125305
7.39	-5.58668e-05	36.95	-0.243863	36.95	-0.123653
7.4	-5.58663e-05	37	-0.152605	37	-0.0773586
7.41	-5.58658e-05	37.05	-0.124902	37.05	-0.0633057
7.42	-5.58654e-05	37.1	-0.0760141	37.1	-0.0385054
7.43	-5.58649e-05	37.15	-0.0971989	37.15	-0.0492538
7.44	-5.58645e-05	37.2	-0.116754	37.2	-0.0591754
7.45	-5.5864e-05	37.25	-0.155864	37.25	-0.0790174
7.46	-5.58635e-05	37.3	-0.155864	37.3	-0.0790184
7.47	-5.58631e-05	37.35	-0.129791	37.35	-0.0657919
7.48	-5.58627e-05	37.4	-0.0971989	37.4	-0.0492585
7.49	-5.58622e-05	37.45	-0.0629773	37.45	-0.0318984
7.5	-5.58618e-05	37.5	-0.167272	37.5	-0.0848087
7.51	-5.58613e-05	37.55	-0.178679	37.55	-0.0905965
7.52	-5.58609e-05	37.6	-0.178679	37.6	-0.0905972
7.53	-5.58605e-05	37.65	-0.155864	37.65	-0.0790239
7.54	-5.586e-05	37.7	-0.0906805	37.7	-0.0459561
7.55	-5.58596e-05	37.75	-0.040163	37.75	-0.0203287
7.56	-5.58592e-05	37.8	-0.0825325	37.8	-0.0418238
7.57	-5.58588e-05	37.85	-0.0939397	37.85	-0.0476114
7.58	-5.58584e-05	37.9	-0.0711253	37.9	-0.036038
7.59	-5.58579e-05	37.95	-0.0841621	37.95	-0.0426523
7.6	-5.58575e-05	38	-0.139568	38	-0.070761
7.61	-5.58571e-05	38.05	-0.219419	38.05	-0.11127
7.62	-5.58567e-05	38.1	-0.168901	38.1	-0.0856428
7.63	-5.58563e-05	38.15	-0.141198	38.15	-0.0715892
7.64	-5.58559e-05	38.2	-0.17216	38.2	-0.0872972
7.65	-5.58555e-05	38.25	-0.170531	38.25	-0.0864709
7.66	-5.58551e-05	38.3	-0.105347	38.3	-0.0534028
7.67	-5.58547e-05	38.35	-0.056459	38.35	-0.0286019
7.68	-5.58543e-05	38.4	-0.0369038	38.4	-0.0186817
7.69	-5.58539e-05	38.45	-0.0809029	38.45	-0.0410033
7.7	-5.58535e-05	38.5	-0.128161	38.5	-0.0649783
7.71	-5.58531e-05	38.55	-0.0971989	38.55	-0.0492711
7.72	-5.58528e-05	38.6	-0.121643	38.6	-0.0616721
7.73	-5.58524e-05	38.65	-0.102088	38.65	-0.0517519
7.74	-5.5852e-05	38.7	-0.0841621	38.7	-0.0426584
7.75	-5.58516e-05	38.75	-0.0792733	38.75	-0.0401786
7.76	-5.58513e-05	38.8	-0.0483109	38.8	-0.0244713
7.77	-5.58509e-05	38.85	-0.0287558	38.85	-0.014551
7.78	-5.58505e-05	38.9	0.00383617	38.9	0.00198292
7.79	-5.58501e-05	38.95	0.025021	38.95	0.0127299
7.8	-5.58498e-05	39	0.0136138	39	0.0069427
7.81	-5.58494e-05	39.05	-0.0939397	39.05	-0.0476206
7.82	-5.5849e-05	39.1	-0.238974	39.1	-0.121198
7.83	-5.58487e-05	39.15	-0.194975	39.15	-0.0988772
7.84	-5.58483e-05	39.2	-0.100458	39.2	-0.0509281
7.85	-5.5848e-05	39.25	-0.0988285	39.25	-0.0501016
7.86	-5.58476e-05	39.3	-0.0385334	39.3	-0.0195134
7.87	-5.58473e-05	39.35	0.0152434	39.35	0.00776787
7.88	-5.58469e-05	39.4	0.0038362	39.4	0.00198071
7.89	-5.58466e-05	39.45	-0.0417925	39.45	-0.0211674
7.9	-5.58462e-05	39.5	-0.103717	39.5	-0.0525827
7.91	-5.58459e-05	39.55	-0.13468	39.55	-0.0682904
7.92	-5.58456e-05	39.6	-0.124902	39.6	-0.0633303
7.93	-5.58452e-05	39.65	-0.0662365	39.65	-0.0335688
7.94	-5.58449e-05	39.7	-0.0417926	39.7	-0.0211683
7.95	-5.58445e-05	39.75	-0.056459	39.75	-0.0286088
7.96	-5.58442e-05	39.8	-0.0890509	39.8	-0.0451432
7.97	-5.58439e-05	39.85	-0.0336446	39.85	-0.0170351
7.98	-5.58436e-05	39.9	0.000576978	39.9	0.000325692
7.99	-5.58432e-05	39.95	-0.0336446	39.95	-0.0170354
8	-5.58429e-05			40	3.27278e-05
8.01	-5.58426e-05			40.05	3.26055e-05
8.02	-5.58423e-05			40.1	3.24871e-05
8.03	-5.58419e-05
8.04	-5.58416e-05
8.05	-5.58413e-05
8.06	-5.5841e-05
8.07	-5.58407e-05
8.08	-5.58404e-05
8.09	-5.58401e-05
8.1	-5.58398e-05
8.11	-5.58395e-05
8.12	-5.58392e-05
8.13	-5.58389e-05
8.14	-5.58386e-05
8.15	-5.58383e-05
8.16	-5.5838e-05
8.17	-5.58377e-05
8.18	-5.58374e-05
8.19	-5.58371e-05
8.2	-5.58368e-05
8.21	-5.58365e-05
8.22	-5.58362e-05
8.23	-5.5836e-05
8.24	-5.58357e-05
8.25	-5.58354e-05
8.26	-5.58351e-05
8.27	-5.58349e-05
8.28	-5.58346e-05
8.29	-5.58343e-05
8.3	-5.5834e-05
8.31	-5.58338e-05
8.32	-5.58335e-05
8.33	-5.58332e-05
8.34	-5.5833e-05
8.35	-5.58327e-05
8.36	-5.58325e-05
8.37	-5.58322e-05
8.38	-5.58319e-05
8.39	-5.58317e-05
8.4	-5.58314e-05
8.41	-5.58312e-05
8.42	-5.58309e-05
8.43	-5.58307e-05
8.44	-5.58304e-05
8.45	-5.58302e-05
8.46	-5.58299e-05
8.47	-5.58297e-05
8.48	-5.58294e-05
8.49	-5.58292e-05
8.5	-5.5829e-05
8.51	-5.58287e-05
8.52	-5.58285e-05
8.53	-5.58283e-05
8.54	-5.5828e-05
8.55	-5.58278e-05
8.56	-5.58276e-05
8.57	-5.58273e-05
8.58	-5.58271e-05
8.59	-5.58269e-05
8.6	-5.58267e-05
8.61	-5.58264e-05
8.62	-5.58262e-05
8.63	-5.5826e-05
8.64	-5.58258e-05
8.65	-5.58255e-05
8.66	-5.58253e-05
8.67	-5.58251e-05
8.68	-5.58249e-05
8.69	-5.58247e-05
8.7	-5.58245e-05
8.71	-5.58243e-05
8.72	-5.58241e-05
8.73	-5.58238e-05
8.74	-5.58236e-05
8.75	-5.58234e-05
8.76	-5.58232e-05
8.77	-5.5823e-05
8.78	-5.58228e-05
8.79	-5.58226e-05
8.8	-5.58224e-05
8.81	-5.58222e-05
8.82	-5.5822e-05
8.83	-5.58218e-05
8.84	-5.58216e-05
8.85	-5.58214e-05
8.86	-5.58213e-05
8.87	-5.58211e-05
8.88	-5.58209e-05
8.89	-5.58207e-05
8.9	-5.58205e-05
8.91	-5.58203e-05
8.92	-5.58201e-05
8.93	-5.58199e-05
8.94	-5.58198e-05
8.95	-5.58196e-05
8.96	-5.58194e-05
8.97	-5.58192e-05
8.98	-5.5819e-05
8.99	-5.58189e-05
9	-5.58187e-05
9.01	-5.58185e-05
9.02	-5.58183e-05
9.03	-5.58182e-05
9.04	-5.5818e-05
9.05	-5.58178e-05
9.06	-5.58176e-05
9.07	-5.58175e-05
9.08	-5.58173e-05
9.09	-5.58171e-05
9.1	-5.5817e-05
9.11	-5.58168e-05
9.12	-5.58166e-05
9.13	-5.58165e-05
9.14	-5.58163e-05
9.15	-5.58161e-05
9.16	-5.5816e-05
9.17	-5.58158e-05
9.18	-5.58157e-05
9.19	-5.58155e-05
9.2	-5.58154e-05
9.21	-5.58152e-05
9.22	-5.5815e-05
9.23	-5.58149e-05
9.24	-5.58147e-05
9.25	-5.58146e-05
9.26	-5.58144e-05
9.27	-5.58143e-05
9.28	-5.58141e-05
9.29	-5.5814e-05
9.3	-5.58138e-05
9.31	-5.58137e-05
9.32	-5.58135e-05
9.33	-5.58134e-05
9.34	-5.58133e-05
9.35	-5.58131e-05
9.36	-5.5813e-05
9.37	-5.58128e-05
9.38	-5.58127e-05
9.39	-5.58126e-05
9.4	-5.58124e-05
9.41	-5.58123e-05
9.42	-5.58121e-05
9.43	-5.5812e-05
9.44	-5.58119e-05
9.45	-5.58117e-05
9.46	-5.58116e-05
9.47	-5.58115e-05
9.48	-5.58113e-05
9.49	-5.58112e-05
9.5	-5.58111e-05
9.51	-5.58109e-05
9.52	-5.58108e-05
9.53	-5.58107e-05
9.54	-5.58106e-05
9.55	-5.58104e-05
9.56	-5.58103e-05
9.57	-5.58102e-05
9.58	-5.58101e-05
9.59	-5.58099e-05
9.6	-5.58098e-05
9.61	-5.58097e-05
9.62	-5.58096e-05
9.63	-5.58094e-05
9.64	-5.58093e-05
9.65	-5.58092e-05
9.66	-5.58091e-05
9.67	-5.5809e-05
9.68	-5.58089e-05
9.69	-5.58087e-05
9.7	-5.58086e-05
9.71	-5.58085e-05
9.72	-5.58084e-05
9.73	-5.58083e-05
9.74	-5.58082e-05
9.75	-5.58081e-05
9.76	-5.58079e-05
9.77	-5.58078e-05
9.78	-5.58077e-05
9.79	-5.58076e-05
9.8	-5.58075e-05
9.81	-5.58074e-05
9.82	-5.58073e-05
9.83	-5.58072e-05
9.84	-5.58071e-05
9.85	-5.5807e-05
9.86	-5.58069e-05
9.87	-5.58068e-05
9.88	-5.58067e-05
9.89	-5.58066e-05
9.9	-5.58065e-05
9.91	-5.58063e-05
9.92	-5.58062e-05
9.93	-5.58061e-05
9.94	-5.5806e-05
9.95	-5.58059e-05
9.96	-5.58058e-05
9.97	-5.58058e-05
9.98	-5.58057e-05
9.99	-5.58056e-05
10	-3.3903e-05
10.01	-4.37849e-05
10.02	-5.56133e-05
10.03	-6.96072e-05
10.04	-8.59921e-05
10.05	-0.000105
10.06	-0.000126869
10.07	-0.000151842
10.08	-0.000180167
10.09	-0.000212095
10.1	-0.000247881
10.11	-0.000287785
10.12	-0.000332066
10.13	-0.000380989
10.14	-0.000434818
10.15	-0.00049382
10.16	-0.000558262
10.17	-0.000628413
10.18	-0.00070454
10.19	-0.000786912
10.2	-0.000875797
10.21	-0.000971462
10.22	-0.00107417
10.23	-0.0011842
10.24	-0.00130179
10.25	-0.00142723
10.26	-0.00156076
10.27	-0.00170264
10.28	-0.00185313
10.29	-0.00201248
10.3	-0.00218095
10.31	-0.00235877
10.32	-0.00254619
10.33	-0.00274345
10.34	-0.00295079
10.35	-0.00316844
10.36	-0.00339663
10.37	-0.00363558
10.38	-0.00388552
10.39	-0.00414666
10.4	-0.00441922
10.41	-0.0047034
10.42	-0.00499941
10.43	-0.00530745
10.44	-0.00562772
10.45	-0.0059604
10.46	-0.00630568
10.47	-0.00666375
10.48	-0.00703478
10.49	-0.00741894
10.5	-0.0078164
10.51	-0.00822733
10.52	-0.00865187
10.53	-0.00909019
10.54	-0.00954243
10.55	-0.0100087
10.56	-0.0104892
10.57	-0.0109841
10.58	-0.0114934
10.59	-0.0120173
10.6	-0.0125559
10.61	-0.0131093
10.62	-0.0136776
10.63	-0.014261
10.64	-0.0148595
10.65	-0.0154733
10.66	-0.0161023
10.67	-0.0167468
10.68	-0.0174067
10.69	-0.0180822
10.7	-0.0187733
10.71	-0.0194801
10.72	-0.0202027
10.73	-0.0209411
10.74	-0.0216953
10.75	-0.0224655
10.76	-0.0232516
10.77	-0.0240537
10.78	-0.0248718
10.79	-0.025706
10.8	-0.0265563
10.81	-0.0274227
10.82	-0.0283053
10.83	-0.0292039
10.84	-0.0301188
10.85	-0.0310498
10.86	-0.0319969
10.87	-0.0329603
10.88	-0.0339398
10.89	-0.0349354
10.9	-0.0359472
10.91	-0.0369751
10.92	-0.038019
10.93	-0.0390791
10.94	-0.0401552
10.95	-0.0412474
10.96	-0.0423555
10.97	-0.0434796
10.98	-0.0446196
10.99	-0.0457755
11	-0.0469472
11.01	-0.0481347
11.02	-0.0493379
11.03	-0.0505567
11.04	-0.0517912
11.05	-0.0530412
11.06	-0.0543068
11.07	-0.0555877
11.08	-0.056884
11.09	-0.0581956
11.1	-0.0595224
11.11	-0.0608643
11.12	-0.0622213
11.13	-0.0635933
11.14	-0.0649802
11.15	-0.0663819
11.16	-0.0677983
11.17	-0.0692293
11.18	-0.0706749
11.19	-0.0721349
11.2	-0.0736093
11.21	-0.075098
11.22	-0.0766008
11.23	-0.0781177
11.24	-0.0796485
11.25	-0.0811932
11.26	-0.0827516
11.27	-0.0843237
11.28	-0.0859093
11.29	-0.0875084
11.3	-0.0891207
11.31	-0.0907463
11.32	-0.092385
11.33	-0.0940366
11.34	-0.0957011
11.35	-0.0973783
11.36	-0.0990681
11.37	-0.10077
11.38	-0.102485
11.39	-0.104212
11.4	-0.105951
11.41	-0.107702
11.42	-0.109465
11.43	-0.11124
11.44	-0.113027
11.45	-0.114825
11.46	-0.116634
11.47	-0.118454
11.48	-0.120286
11.49	-0.122129
11.5	-0.123982
11.51	-0.125847
11.52	-0.127722
11.53	-0.129607
11.54	-0.131503
11.55	-0.133409
11.56	-0.135325
11.57	-0.137251
11.58	-0.139186
11.59	-0.141132
11.6	-0.143087
11.61	-0.145051
11.62	-0.147025
11.63	-0.149008
11.64	-0.150999
11.65	-0.153
11.66	-0.155009
11.67	-0.157027
11.68	-0.159054
11.69	-0.161089
11.7	-0.163132
11.71	-0.165183
11.72	-0.167242
11.73	-0.169309
11.74	-0.171383
11.75	-0.173465
11.76	-0.175555
11.77	-0.177652
11.78	-0.179755
11.79	-0.181866
11.8	-0.183984
11.81	-0.186108
11.82	-0.18824
11.83	-0.190377
11.84	-0.192521
11.85	-0.194671
11.86	-0.196827
11.87	-0.198989
11.88	-0.201157
11.89	-0.203331
11.9	-0.20551
11.91	-0.207695
11.92	-0.209885
11.93	-0.21208
11.94	-0.21428
11.95	-0.216485
11.96	-0.218695
11.97	-0.22091
11.98	-0.223129
11.99	-0.225353
12	-0.227581
12.01	-0.229813
12.02	-0.232049
12.03	-0.234289
12.04	-0.236533
12.05	-0.238781
12.06	-0.241032
12.07	-0.243287
12.08	-0.245545
12.09	-0.247807
12.1	-0.250071
12.11	-0.252339
12.12	-0.254609
12.13	-0.256882
12.14	-0.259158
12.15	-0.261436
12.16	-0.263717
12.17	-0.266
12.18	-0.268285
12.19	-0.270573
12.2	-0.272862
12.21	-0.275154
12.22	-0.277447
12.23	-0.279742
12.24	-0.282038
12.25	-0.284336
12.26	-0.286635
12.27	-0.288935
12.28	-0.291237
12.29	-0.29354
12.3	-0.295843
12.31	-0.298148
12.32	-0.300453
12.33	-0.302759
12.34	-0.305065
12.35	-0.307372
12.36	-0.30968
12.37	-0.311987
12.38	-0.314295
12.39	-0.316603
12.4	-0.318911
12.41	-0.321218
12.42	-0.323526
12.43	-0.325833
12.44	-0.32814
12.45	-0.330446
12.46	-0.332752
12.47	-0.335058
12.48	-0.337362
12.49	-0.339666
12.5	-0.341969
12.51	-0.344271
12.52	-0.346571
12.53	-0.348871
12.54	-0.35117
12.55	-0.353467
12.56	-0.355763
12.57	-0.358057
12.58	-0.36035
12.59	-0.362641
12.6	-0.364931
12.61	-0.367219
12.62	-0.369505
12.63	-0.371789
12.64	-0.374071
12.65	-0.376351
12.66	-0.378629
12.67	-0.380905
12.68	-0.383178
12.69	-0.385449
12.7	-0.387718
12.71	-0.389984
12.72	-0.392248
12.73	-0.394509
12.74	-0.396768
12.75	-0.399024
12.76	-0.401277
12.77	-0.403527
12.78	-0.405775
12.79	-0.408019
12.8	-0.41026
12.81	-0.412499
12.82	-0.414734
12.83	-0.416966
12.84	-0.419194
12.85	-0.42142
12.86	-0.423642
12.87	-0.42586
12.88	-0.428076
12.89	-0.430287
12.9	-0.432495
12.91	-0.4347
12.92	-0.4369
12.93	-0.439097
12.94	-0.441291
12.95	-0.44348
12.96	-0.445666
12.97	-0.447847
12.98	-0.450025
12.99	-0.452198
13	-0.454368
13.01	-0.456533
13.02	-0.458695
13.03	-0.460852
13.04	-0.463005
13.05	-0.465153
13.06	-0.467298
13.07	-0.469438
13.08	-0.471573
13.09	-0.473704
13.1	-0.475831
13.11	-0.477953
13.12	-0.480071
13.13	-0.482184
13.14	-0.484292
13.15	-0.486396
13.16	-0.488495
13.17	-0.49059
13.18	-0.492679
13.19	-0.494764
13.2	-0.496844
13.21	-0.498919
13.22	-0.50099
13.23	-0.503055
13.24	-0.505115
13.25	-0.507171
13.26	-0.509221
13.27	-0.511267
13.28	-0.513307
13.29	-0.515343
13.3	-0.517373
13.31	-0.519398
13.32	-0.521418
13.33	-0.523433
13.34	-0.525442
13.35	-0.527446
13.36	-0.529446
13.37	-0.531439
13.38	-0.533428
13.39	-0.535411
13.4	-0.537389
13.41	-0.539361
13.42	-0.541328
13.43	-0.54329
13.44	-0.545246
13.45	-0.547197
13.46	-0.549143
13.47	-0.551083
13.48	-0.553017
13.49	-0.554946
13.5	-0.556869
13.51	-0.558787
13.52	-0.560699
13.53	-0.562606
13.54	-0.564507
13.55	-0.566403
13.56	-0.568293
13.57	-0.570177
13.58	-0.572056
13.59	-0.573929
13.6	-0.575796
13.61	-0.577658
13.62	-0.579514
13.63	-0.581364
13.64	-0.583209
13.65	-0.585048
13.66	-0.586881
13.67	-0.588709
13.68	-0.59053
13.69	-0.592346
13.7	-0.594157
13.71	-0.595961
13.72	-0.59776
13.73	-0.599553
13.74	-0.60134
13.75	-0.603121
13.76	-0.604897
13.77	-0.606667
13.78	-0.608431
13.79	-0.610189
13.8	-0.611941
13.81	-0.613688
13.82	-0.615428
13.83	-0.617163
13.84	-0.618892
13.85	-0.620615
13.86	-0.622333
13.87	-0.624044
13.88	-0.62575
13.89	-0.62745
13.9	-0.629144
13.91	-0.630832
13.92	-0.632514
13.93	-0.634191
13.94	-0.635861
13.95	-0.637526
13.96	-0.639185
13.97	-0.640838
13.98	-0.642486
13.99	-0.644127
14	-0.645763
14.01	-0.647393
14.02	-0.649016
14.03	-0.650635
14.04	-0.652247
14.05	-0.653853
14.06	-0.655454
14.07	-0.657049
14.08	-0.658638
14.09	-0.660221
14.1	-0.661798
14.11	-0.66337
14.12	-0.664936
14.13	-0.666496
14.14	-0.66805
14.15	-0.669598
14.16	-0.671141
14.17	-0.672678
14.18	-0.674209
14.19	-0.675734
14.2	-0.677254
14.21	-0.678768
14.22	-0.680276
14.23	-0.681778
14.24	-0.683275
14.25	-0.684766
14.26	-0.686251
14.27	-0.68773
14.28	-0.689204
14.29	-0.690672
14.3	-0.692135
14.31	-0.693592
14.32	-0.695043
14.33	-0.696488
14.34	-0.697928
14.35	-0.699362
14.36	-0.70079
14.37	-0.702213
14.38	-0.703631
14.39	-0.705042
14.4	-0.706448
14.41	-0.707849
14.42	-0.709244
14.43	-0.710633
14.44	-0.712017
14.45	-0.713395
14.46	-0.714768
14.47	-0.716135
14.48	-0.717496
14.49	-0.718853
14.5	-0.720203
14.51	-0.721548
14.52	-0.722888
14.53	-0.724222
14.54	-0.725551
14.55	-0.726875
14.56	-0.728192
14.57	-0.729505
14.58	-0.730812
14.59	-0.732114
14.6	-0.73341
14.61	-0.734701
14.62	-0.735987
14.63	-0.737267
14.64	-0.738542
14.65	-0.739812
14.66	-0.741076
14.67	-0.742335
14.68	-0.743589
14.69	-0.744838
14.7	-0.746081
14.71	-0.747319
14.72	-0.748552
14.73	-0.749779
14.74	-0.751002
14.75	-0.752219
14.76	-0.753431
14.77	-0.754638
14.78	-0.755839
14.79	-0.757036
14.8	-0.758228
14.81	-0.759414
14.82	-0.760595
14.83	-0.761771
14.84	-0.762943
14.85	-0.764109
14.86	-0.76527
14.87	-0.766426
14.88	-0.767577
14.89	-0.768723
14.9	-0.769864
14.91	-0.771
14.92	-0.772131
14.93	-0.773257
14.94	-0.774379
14.95	-0.775495
14.96	-0.776606
14.97	-0.777713
14.98	-0.778815
14.99	-0.779912
15	-0.781004
15.01	-0.782091
15.02	-0.783173
15.03	-0.784251
15.04	-0.785324
15.05	-0.786392
15.06	-0.787455
15.07	-0.788514
15.08	-0.789568
15.09	-0.790617
15.1	-0.791662
15.11	-0.792701
15.12	-0.793737
15.13	-0.794767
15.14	-0.795793
15.15	-0.796814
15.16	-0.797831
15.17	-0.798843
15.18	-0.799851
15.19	-0.800854
15.2	-0.801852
15.21	-0.802846
15.22	-0.803836
15.23	-0.804821
15.24	-0.805801
15.25	-0.806777
15.26	-0.807749
15.27	-0.808716
15.28	-0.809679
15.29	-0.810637
15.3	-0.811591
15.31	-0.81254
15.32	-0.813486
15.33	-0.814427
15.34	-0.815363
15.35	-0.816295
15.36	-0.817223
15.37	-0.818147
15.38	-0.819066
15.39	-0.819982
15.4	-0.820893
15.41	-0.821799
15.42	-0.822702
15.43	-0.8236
15.44	-0.824494
15.45	-0.825384
15.46	-0.82627
15.47	-0.827152
15.48	-0.82803
15.49	-0.828903
15.5	-0.829773
15.51	-0.830638
15.52	-0.831499
15.53	-0.832357
15.54	-0.83321
15.55	-0.834059
15.56	-0.834905
15.57	-0.835746
15.58	-0.836583
15.59	-0.837417
15.6	-0.838246
15.61	-0.839072
15.62	-0.839893
15.63	-0.840711
15.64	-0.841525
15.65	-0.842335
15.66	-0.843141
15.67	-0.843944
15.68	-0.844742
15.69	-0.845537
15.7	-0.846328
15.71	-0.847116
15.72	-0.847899
15.73	-0.848679
15.74	-0.849455
15.75	-0.850227
15.76	-0.850996
15.77	-0.851761
15.78	-0.852522
15.79	-0.85328
15.8	-0.854034
15.81	-0.854784
15.82	-0.855531
15.83	-0.856274
15.84	-0.857014
15.85	-0.85775
15.86	-0.858483
15.87	-0.859212
15.88	-0.859937
15.89	-0.860659
15.9	-0.861378
15.91	-0.862093
15.92	-0.862804
15.93	-0.863513
15.94	-0.864217
15.95	-0.864919
15.96	-0.865616
15.97	-0.866311
15.98	-0.867002
15.99	-0.86769
16	-0.868374
16.01	-0.869055
16.02	-0.869733
16.03	-0.870408
16.04	-0.871079
16.05	-0.871747
16.06	-0.872411
16.07	-0.873073
16.08	-0.873731
16.09	-0.874386
16.1	-0.875038
16.11	-0.875686
16.12	-0.876331
16.13	-0.876974
16.14	-0.877613
16.15	-0.878249
16.16	-0.878881
16.17	-0.879511
16.18	-0.880138
16.19	-0.880761
16.2	-0.881381
16.21	-0.881999
16.22	-0.882613
16.23	-0.883224
16.24	-0.883833
16.25	-0.884438
16.26	-0.88504
16.27	-0.885639
16.28	-0.886236
16.29	-0.886829
16.3	-0.887419
16.31	-0.888007
16.32	-0.888591
16.33	-0.889173
16.34	-0.889752
16.35	-0.890328
16.36	-0.890901
16.37	-0.891471
16.38	-0.892038
16.39	-0.892603
16.4	-0.893164
16.41	-0.893723
16.42	-0.894279
16.43	-0.894833
16.44	-0.895383
16.45	-0.895931
16.46	-0.896476
16.47	-0.897018
16.48	-0.897558
16.49	-0.898095
16.5	-0.898629
16.51	-0.899161
16.52	-0.89969
16.53	-0.900216
16.54	-0.900739
16.55	-0.90126
16.56	-0.901779
16.57	-0.902295
16.58	-0.902808
16.59	-0.903318
16.6	-0.903826
16.61	-0.904332
16.62	-0.904835
16.63	-0.905335
16.64	-0.905833
16.65	-0.906328
16.66	-0.906821
16.67	-0.907311
16.68	-0.907799
16.69	-0.908284
16.7	-0.908767
16.71	-0.909248
16.72	-0.909726
16.73	-0.910202
16.74	-0.910675
16.75	-0.911146
16.76	-0.911614
16.77	-0.91208
16.78	-0.912544
16.79	-0.913005
16.8	-0.913464
16.81	-0.913921
16.82	-0.914375
16.83	-0.914827
16.84	-0.915277
16.85	-0.915724
16.86	-0.91617
16.87	-0.916612
16.88	-0.917053
16.89	-0.917491
16.9	-0.917928
16.91	-0.918362
16.92	-0.918793
16.93	-0.919223
16.94	-0.91965
16.95	-0.920075
16.96	-0.920498
16.97	-0.920919
16.98	-0.921338
16.99	-0.921754
17	-0.922169
17.01	-0.922581
17.02	-0.922991
17.03	-0.923399
17.04	-0.923805
17.05	-0.924209
17.06	-0.924611
17.07	-0.92501
17.08	-0.925408
17.09	-0.925804
17.1	-0.926197
17.11	-0.926589
17.12	-0.926979
17.13	-0.927366
17.14	-0.927752
17.15	-0.928135
17.16	-0.928517
17.17	-0.928897
17.18	-0.929274
17.19	-0.92965
17.2	-0.930024
17.21	-0.930396
17.22	-0.930766
17.23	-0.931134
17.24	-0.9315
17.25	-0.931864
17.26	-0.932227
17.27	-0.932587
17.28	-0.932946
17.29	-0.933303
17.3	-0.933658
17.31	-0.934011
17.32	-0.934362
17.33	-0.934711
17.34	-0.935059
17.35	-0.935405
17.36	-0.935749
17.37	-0.936091
17.38	-0.936432
17.39	-0.936771
17.4	-0.937108
17.41	-0.937443
17.42	-0.937776
17.43	-0.938108
17.44	-0.938438
17.45	-0.938767
17.46	-0.939093
17.47	-0.939418
17.48	-0.939741
17.49	-0.940063
17.5	-0.940383
17.51	-0.940701
17.52	-0.941018
17.53	-0.941333
17.54	-0.941646
17.55	-0.941957
17.56	-0.942268
17.57	-0.942576
17.58	-0.942883
17.59	-0.943188
17.6	-0.943492
17.61	-0.943794
17.62	-0.944094
17.63	-0.944393
17.64	-0.94469
17.65	-0.944986
17.66	-0.94528
17.67	-0.945573
17.68	-0.945864
17.69	-0.946154
17.7	-0.946442
17.71	-0.946729
17.72	-0.947014
17.73	-0.947297
17.74	-0.94758
17.75	-0.94786
17.76	-0.948139
17.77	-0.948417
17.78	-0.948693
17.79	-0.948968
17.8	-0.949242
17.81	-0.949514
17.82	-0.949784
17.83	-0.950053
17.84	-0.950321
17.85	-0.950587
17.86	-0.950852
17.87	-0.951116
17.88	-0.951378
17.89	-0.951639
17.9	-0.951898
17.91	-0.952156
17.92	-0.952413
17.93	-0.952668
17.94	-0.952922
17.95	-0.953175
17.96	-0.953426
17.97	-0.953676
17.98	-0.953925
17.99	-0.954172
18	-0.954418
18.01	-0.954663
18.02	-0.954906
18.03	-0.955149
18.04	-0.95539
18.05	-0.955629
18.06	-0.955868
18.07	-0.956105
18.08	-0.956341
18.09	-0.956575
18.1	-0.956809
18.11	-0.957041
18.12	-0.957272
18.13	-0.957502
18.14	-0.95773
18.15	-0.957958
18.16	-0.958184
18.17	-0.958409
18.18	-0.958632
18.19	-0.958855
18.2	-0.959076
18.21	-0.959297
18.22	-0.959516
18.23	-0.959733
18.24	-0.95995
18.25	-0.960166
18.26	-0.96038
18.27	-0.960594
18.28	-0.960806
18.29	-0.961017
18.3	-0.961227
18.31	-0.961436
18.32	-0.961643
18.33	-0.96185
18.34	-0.962056
18.35	-0.96226
18.36	-0.962463
18.37	-0.962666
18.38	-0.962867
18.39	-0.963067
18.4	-0.963266
18.41	-0.963464
18.42	-0.963661
18.43	-0.963857
18.44	-0.964052
18.45	-0.964246
18.46	-0.964439
18.47	-0.964631
18.48	-0.964821
18.49	-0.965011
18.5	-0.9652
18.51	-0.965388
18.52	-0.965574
18.53	-0.96576
18.54	-0.965945
18.55	-0.966129
18.56	-0.966312
18.57	-0.966494
18.58	-0.966675
18.59	-0.966854
18.6	-0.967033
18.61	-0.967211
18.62	-0.967389
18.63	-0.967565
18.64	-0.96774
18.65	-0.967914
18.66	-0.968088
18.67	-0.96826
18.68	-0.968431
18.69	-0.968602
18.7	-0.968772
18.71	-0.968941
18.72	-0.969108
18.73	-0.969275
18.74	-0.969442
18.75	-0.969607
18.76	-0.969771
18.77	-0.969935
18.78	-0.970097
18.79	-0.970259
18.8	-0.97042
18.81	-0.97058
18.82	-0.970739
18.83	-0.970897
18.84	-0.971055
18.85	-0.971211
18.86	-0.971367
18.87	-0.971522
18.88	-0.971676
18.89	-0.971829
18.9	-0.971982
18.91	-0.972134
18.92	-0.972284
18.93	-0.972434
18.94	-0.972584
18.95	-0.972732
18.96	-0.97288
18.97	-0.973027
18.98	-0.973173
18.99	-0.973318
19	-0.973463
19.01	-0.973606
19.02	-0.973749
19.03	-0.973892
19.04	-0.974033
19.05	-0.974174
19.06	-0.974314
19.07	-0.974453
19.08	-0.974591
19.09	-0.974729
19.1	-0.974866
19.11	-0.975002
19.12	-0.975138
19.13	-0.975273
19.14	-0.975407
19.15	-0.97554
19.16	-0.975673
19.17	-0.975805
19.18	-0.975936
19.19	-0.976067
19.2	-0.976196
19.21	-0.976325
19.22	-0.976454
19.23	-0.976582
19.24	-0.976709
19.25	-0.976835
19.26	-0.976961
19.27	-0.977086
19.28	-0.97721
19.29	-0.977334
19.3	-0.977457
19.31	-0.977579
19.32	-0.977701
19.33	-0.977822
19.34	-0.977943
19.35	-0.978062
19.36	-0.978181
19.37	-0.9783
19.38	-0.978418
19.39	-0.978535
19.4	-0.978652
19.41	-0.978768
19.42	-0.978883
19.43	-0.978998
19.44	-0.979112
19.45	-0.979225
19.46	-0.979338
19.47	-0.97945
19.48	-0.979562
19.49	-0.979673
19.5	-0.979784
19.51	-0.979894
19.52	-0.980003
19.53	-0.980112
19.54	-0.98022
19.55	-0.980327
19.56	-0.980434
19.57	-0.980541
19.58	-0.980646
19.59	-0.980752
19.6	-0.980856
19.61	-0.980961
19.62	-0.981064
19.63	-0.981167
19.64	-0.98127
19.65	-0.981371
19.66	-0.981473
19.67	-0.981574
19.68	-0.981674
19.69	-0.981774
19.7	-0.981873
19.71	-0.981971
19.72	-0.98207
19.73	-0.982167
19.74	-0.982264
19.75	-0.982361
19.76	-0.982457
19.77	-0.982552
19.78	-0.982647
19.79	-0.982742
19.8	-0.982836
19.81	-0.982929
19.82	-0.983022
19.83	-0.983115
19.84	-0.983207
19.85	-0.983298
19.86	-0.983389
19.87	-0.98348
19.88	-0.98357
19.89	-0.983659
19.9	-0.983748
19.91	-0.983837
19.92	-0.983925
19.93	-0.984013
19.94	-0.9841
19.95	-0.984186
19.96	-0.984273
[truncated: 2,004 more rows]

## Sheet: 6D
Data related to Figure 6D
	ICa_pre													Vm_pre																	Summary data for ICa with interval
	AP_alone	EP_AP	EP1_AP	EP2_AP	EP3_AP	EP4_AP	EP5_AP	EP6_AP	EP7_AP	EP8_AP	EP9_AP	EP10_AP		AP_alone	EP_AP	EP1_AP	EP2_AP	EP3_AP	EP4_AP	EP5_AP	EP6_AP	EP7_AP	EP8_AP	EP9_AP	EP10_AP						Interval	ICa_augmentation
0	-0.00161865	-0.00161959	-0.00161959	-0.00162073	-0.00161921	-0.00161959	-0.00161922	-0.00161959	-0.00161959	-0.00161959	-0.00162073	-0.00161921		-70.0188	-70.0188	-70.0188	-70.1126	-69.9875	-70.0188	-69.9876	-70.0188	-70.0188	-70.0188	-70.1126	-69.9875		scale bar				0	1.20895
0.02	-0.00161884	-0.00161978	-0.00161978	-0.00161975	-0.00161904	-0.00162016	-0.00162017	-0.00161978	-0.0016194	-0.00162054	-0.00162089	-0.00162017		-69.9563	-69.9563	-69.9563	-69.9563	-69.8938	-69.9876	-69.9875	-69.9563	-69.925	-70.0188	-70.0501	-69.9876		20	-40	-7		1	1.14142
0.04	-0.00162018	-0.00162113	-0.00162189	-0.0016211	-0.00162116	-0.00162112	-0.00162113	-0.00161961	-0.00162266	-0.00162111	-0.00162068	-0.00162075		-69.9875	-69.9875	-70.05	-69.9875	-69.9875	-69.9875	-69.9875	-69.8625	-70.1126	-69.9875	-69.9562	-69.9562		30	-40	-7		2	1.08457
0.06	-0.00162076	-0.00162246	-0.00162244	-0.00162205	-0.00162174	-0.00162283	-0.00162171	-0.00162175	-0.00162243	-0.00162131	-0.00162051	-0.00162172		-69.9563	-70.0188	-70.0188	-69.9876	-69.9563	-70.0501	-69.9563	-69.9563	-70.0188	-69.9251	-69.8625	-69.9563		30	-20	-7		3	1.05062
0.08	-0.00162173	-0.00162379	-0.00162339	-0.00162187	-0.00162309	-0.00162377	-0.00162343	-0.00162347	-0.00162262	-0.00162228	-0.00162303	-0.00162344		-69.9563	-70.0501	-70.0188	-69.8937	-69.9876	-70.0501	-70.0189	-70.0188	-69.9563	-69.925	-69.9876	-70.0189						4	1.03179
0.1	-0.00162307	-0.00162472	-0.00162395	-0.00162362	-0.00162442	-0.00162546	-0.00162324	-0.0016229	-0.00162434	-0.00162326	-0.00162361	-0.00162591		-69.9875	-70.0501	-69.9875	-69.9562	-70.0188	-70.1126	-69.925	-69.8937	-70.0188	-69.925	-69.9563	-70.1438						5	1.02013
0.12	-0.00162365	-0.0016249	-0.00162339	-0.00162458	-0.00162385	-0.00162447	-0.00162535	-0.00162503	-0.00162453	-0.001625	-0.00162533	-0.00162605		-69.9563	-69.9875	-69.8625	-69.9563	-69.8938	-69.9563	-70.0188	-69.9876	-69.9563	-69.9876	-70.0189	-70.0814						6	1.01296
0.14	-0.00162499	-0.00162585	-0.00162553	-0.00162669	-0.00162597	-0.0016262	-0.0016263	-0.00162636	-0.00162626	-0.00162709	-0.00162742	-0.00162773		-69.9875	-69.9875	-69.9562	-70.05	-69.9875	-70.0188	-70.0188	-70.0188	-70.0188	-70.0813	-70.1125	-70.1439						7	1.00982
0.16	-0.00162519	-0.00162719	-0.00162611	-0.00162496	-0.00162541	-0.00162638	-0.0016261	-0.00162579	-0.00162644	-0.00162573	-0.00162681	-0.00162902		-69.925	-70.0188	-69.925	-69.8312	-69.8625	-69.9563	-69.925	-69.8937	-69.9562	-69.8938	-69.9876	-70.1751						8	1.00809
0.18	-0.00162769	-0.00162737	-0.00162975	-0.00162902	-0.00162831	-0.00162849	-0.00162974	-0.00162868	-0.00163007	-0.001629	-0.00162929	-0.00162991		-70.0501	-69.9563	-70.1439	-70.0814	-70.0188	-70.0501	-70.1439	-70.0501	-70.1752	-70.0814	-70.1127	-70.1752						9	1.00634
0.2	-0.00162824	-0.00162834	-0.00162951	-0.00162955	-0.00162963	-0.00162904	-0.00162798	-0.00162999	-0.00163058	-0.00162992	-0.00162944	-0.00163118		-70.0188	-69.9563	-70.05	-70.05	-70.05	-70.0188	-69.925	-70.0814	-70.1439	-70.0813	-70.0501	-70.2065						10	1.00708
0.22	-0.00162918	-0.00163006	-0.00163006	-0.00162934	-0.00163018	-0.00162999	-0.00162971	-0.00163053	-0.00163034	-0.0016297	-0.00163037	-0.00163206		-70.0188	-70.0188	-70.0188	-69.9562	-70.0188	-70.0188	-69.9875	-70.0501	-70.0501	-69.9875	-70.05	-70.2064
0.24	-0.00163089	-0.00163062	-0.00163139	-0.00163183	-0.00163265	-0.00163131	-0.00163181	-0.00163261	-0.00163279	-0.00163218	-0.00163206	-0.00163218		-70.0813	-69.9875	-70.05	-70.0813	-70.1439	-70.05	-70.0813	-70.1439	-70.1751	-70.1126	-70.1126	-70.1438
0.26	-0.00163143	-0.00163158	-0.00163156	-0.00163276	-0.00163241	-0.00163224	-0.00163273	-0.00163236	-0.00163216	-0.00163195	-0.00163221	-0.00163499		-70.0501	-69.9875	-69.9876	-70.0814	-70.0501	-70.0501	-70.0814	-70.0501	-70.0501	-70.0189	-70.0501	-70.3003
0.28	-0.00163198	-0.00163329	-0.00163327	-0.00163291	-0.00163257	-0.00163165	-0.00163213	-0.00163215	-0.00163385	-0.00163327	-0.00163238	-0.00163354		-70.0188	-70.0501	-70.05	-70.0188	-69.9876	-69.925	-69.9562	-69.9563	-70.1126	-70.05	-69.9875	-70.1126
0.3	-0.00163178	-0.00163346	-0.00163344	-0.00163347	-0.001632	-0.00163186	-0.00163156	-0.00163197	-0.00163247	-0.00163191	-0.00163295	-0.00163178		-69.925	-69.9875	-69.9875	-69.9875	-69.8625	-69.8625	-69.8312	-69.8625	-69.925	-69.8625	-69.9562	-69.8937
0.32	-0.00163351	-0.00163518	-0.00163477	-0.00163404	-0.00163414	-0.00163476	-0.00163448	-0.00163487	-0.00163383	-0.00163405	-0.00163429	-0.00163467		-69.9875	-70.0501	-70.0188	-69.9562	-69.9562	-70.0187	-69.9875	-70.0188	-69.9562	-69.9563	-69.9875	-70.0501
0.34	-0.00163523	-0.00163611	-0.00163495	-0.00163577	-0.00163587	-0.0016357	-0.00163734	-0.00163658	-0.00163594	-0.00163693	-0.00163678	-0.00163522		-70.0501	-70.0501	-69.9563	-70.0188	-70.0188	-70.0188	-70.1439	-70.0813	-70.0501	-70.1127	-70.1127	-70.0189
0.36	-0.00163616	-0.00163627	-0.00163668	-0.00163709	-0.00163719	-0.0016355	-0.00163709	-0.00163788	-0.0016361	-0.00163669	-0.00163692	-0.00163578		-70.0501	-69.9875	-70.0188	-70.0501	-70.0501	-69.925	-70.0501	-70.1127	-69.9876	-70.0188	-70.0501	-69.9876
0.38	-0.00163709	-0.00163761	-0.00163877	-0.00163802	-0.00163812	-0.001638	-0.00163726	-0.00163841	-0.00163782	-0.00163763	-0.00163862	-0.00163673		-70.0501	-70.0188	-70.1127	-70.0501	-70.0501	-70.0501	-69.9875	-70.0814	-70.0501	-70.0189	-70.1126	-69.9876
0.4	-0.00163764	-0.00163855	-0.00163929	-0.00163742	-0.00163714	-0.00163817	-0.00163821	-0.00163933	-0.00163798	-0.00163819	-0.00163799	-0.00163807		-70.0188	-70.0188	-70.0814	-69.925	-69.8937	-69.9875	-69.9876	-70.0814	-69.9876	-69.9876	-69.9876	-70.0188
0.42	-0.0016382	-0.00163949	-0.00163906	-0.00164031	-0.00163965	-0.00163873	-0.00163839	-0.00163948	-0.00163932	-0.0016399	-0.00163856	-0.00163824		-69.9875	-70.0188	-69.9875	-70.0813	-70.0188	-69.9562	-69.925	-70.0188	-70.0188	-70.0501	-69.9562	-69.9562
0.44	-0.00163991	-0.00164004	-0.00164001	-0.00163969	-0.00164098	-0.00164123	-0.0016409	-0.0016408	-0.00164102	-0.00164083	-0.00164106	-0.00164112		-70.0501	-69.9875	-69.9876	-69.9563	-70.0501	-70.0813	-70.0501	-70.0501	-70.0814	-70.0501	-70.0814	-70.1126
0.46	-0.00164046	-0.00164099	-0.00164135	-0.00164181	-0.00164229	-0.00164215	-0.00164183	-0.00164211	-0.00164233	-0.00164253	-0.00164082	-0.00164164		-70.0188	-69.9875	-70.0188	-70.05	-70.0813	-70.0813	-70.0501	-70.0814	-70.1126	-70.1126	-69.9875	-70.0814
0.48	-0.00164101	-0.00164271	-0.0016419	-0.00164312	-0.00164128	-0.00164191	-0.00164199	-0.00164265	-0.00164093	-0.00164228	-0.00164139	-0.00164026		-69.9875	-70.0501	-69.9875	-70.0813	-69.925	-69.9875	-69.9875	-70.05	-69.925	-70.0188	-69.9562	-69.8937
0.5	-0.00164235	-0.00164249	-0.00164285	-0.00164442	-0.00164341	-0.00164286	-0.00164409	-0.00164319	-0.00164344	-0.00164245	-0.00164273	-0.00164162		-70.0188	-69.9563	-69.9876	-70.1126	-70.0188	-69.9876	-70.0813	-70.0188	-70.0501	-69.9562	-69.9875	-69.925
0.52	-0.00164367	-0.0016446	-0.00164418	-0.00164417	-0.0016455	-0.00164343	-0.00164424	-0.00164413	-0.00164321	-0.00164534	-0.00164445	-0.00164336		-70.0501	-70.0501	-70.0188	-70.0188	-70.1127	-69.9563	-70.0188	-70.0188	-69.9563	-70.1126	-70.0501	-69.9876
0.54	-0.00164498	-0.00164514	-0.00164589	-0.0016455	-0.00164564	-0.00164554	-0.00164595	-0.00164622	-0.00164532	-0.00164547	-0.00164615	-0.00164546		-70.0813	-70.0188	-70.0813	-70.0501	-70.05	-70.0501	-70.0813	-70.1126	-70.0501	-70.05	-70.1126	-70.0813
0.56	-0.00164513	-0.00164646	-0.00164565	-0.00164642	-0.00164656	-0.00164531	-0.00164686	-0.00164636	-0.0016451	-0.00164563	-0.00164667	-0.00164484		-70.0188	-70.0501	-69.9875	-70.0501	-70.0501	-69.9562	-70.0813	-70.0501	-69.9562	-69.9875	-70.0814	-69.9563
0.58	-0.00164607	-0.00164701	-0.0016466	-0.00164812	-0.00164749	-0.00164666	-0.00164662	-0.0016469	-0.00164567	-0.00164658	-0.00164758	-0.00164503		-70.0188	-70.0188	-69.9875	-70.1126	-70.0501	-69.9875	-69.9875	-70.0188	-69.925	-69.9875	-70.0814	-69.8937
0.6	-0.00164662	-0.00164717	-0.00164755	-0.0016471	-0.00164726	-0.0016476	-0.00164718	-0.00164861	-0.00164625	-0.00164753	-0.00164734	-0.00164563		-69.9875	-69.9563	-69.9875	-69.9563	-69.9562	-69.9875	-69.9562	-70.0813	-69.8937	-69.9875	-69.9875	-69.8624
0.62	-0.00164757	-0.00164813	-0.00164811	-0.00164844	-0.00164976	-0.00164739	-0.00164891	-0.00164952	-0.00164723	-0.00164809	-0.00164752	-0.00164585		-69.9875	-69.9563	-69.9562	-69.9875	-70.0813	-69.8937	-70.0188	-70.0813	-69.8937	-69.9563	-69.925	-69.7999
0.64	-0.00164852	-0.00165025	-0.00164984	-0.001649	-0.0016499	-0.00164876	-0.00164908	-0.00164928	-0.00164976	-0.00164827	-0.00164926	-0.00164686		-69.9875	-70.0501	-70.0187	-69.9563	-70.0188	-69.925	-69.9562	-69.9875	-70.0188	-69.8937	-69.9875	-69.7999
0.66	-0.00165023	-0.00165156	-0.00165193	-0.00164996	-0.00165007	-0.0016505	-0.0016512	-0.00165138	-0.00165108	-0.0016508	-0.00165059	-0.00164941		-70.0501	-70.0813	-70.1126	-69.9563	-69.9563	-69.9876	-70.0501	-70.0813	-70.0501	-70.0188	-70.0188	-69.925
0.68	-0.00165077	-0.00165131	-0.00165207	-0.00165169	-0.00165141	-0.00165145	-0.00165135	-0.00165191	-0.001652	-0.00165058	-0.00165114	-0.00165115		-70.0188	-69.9875	-70.0501	-70.0188	-69.9876	-69.9876	-69.9875	-70.0501	-70.05	-69.925	-69.9875	-69.9875
0.7	-0.00165094	-0.00165265	-0.0016526	-0.00165147	-0.00165159	-0.00165162	-0.00165229	-0.00165013	-0.00165138	-0.00165116	-0.00165132	-0.00165094		-69.9563	-70.0188	-70.0188	-69.925	-69.9251	-69.925	-69.9876	-69.8312	-69.925	-69.8938	-69.925	-69.8938
0.72	-0.00165189	-0.00165358	-0.00165238	-0.00165243	-0.00165371	-0.00165181	-0.00165247	-0.00165268	-0.00165274	-0.0016533	-0.00165151	-0.00165115		-69.9563	-70.0188	-69.9251	-69.9251	-70.0188	-69.8625	-69.9251	-69.9563	-69.9563	-69.9876	-69.8625	-69.8312
0.74	-0.00165362	-0.00165413	-0.00165489	-0.00165533	-0.00165503	-0.00165474	-0.00165498	-0.00165441	-0.00165447	-0.00165424	-0.00165443	-0.00165292		-70.0188	-69.9875	-70.0501	-70.0813	-70.05	-70.0188	-70.0501	-70.0188	-70.0188	-69.9875	-70.0188	-69.8937
0.76	-0.00165495	-0.00165507	-0.00165659	-0.0016547	-0.00165635	-0.00165567	-0.00165629	-0.00165651	-0.00165656	-0.0016548	-0.00165614	-0.00165351		-70.0501	-69.9875	-70.1127	-69.9563	-70.0814	-70.0188	-70.0814	-70.1126	-70.1126	-69.9563	-70.0813	-69.8625
0.78	-0.00165548	-0.00165602	-0.00165749	-0.00165682	-0.00165532	-0.00165583	-0.00165682	-0.00165508	-0.00165591	-0.00165653	-0.00165628	-0.00165527		-70.0188	-69.9875	-70.1126	-70.0501	-69.925	-69.9563	-70.0501	-69.925	-69.9875	-70.0188	-70.0188	-69.925
0.8	-0.00165642	-0.00165812	-0.00165723	-0.00165774	-0.00165745	-0.00165717	-0.00165696	-0.00165721	-0.00165725	-0.00165669	-0.00165683	-0.00165663		-70.0188	-70.0813	-70.0188	-70.0501	-70.0188	-69.9876	-69.9875	-70.0188	-70.0188	-69.9562	-69.9875	-69.9562
0.82	-0.00165774	-0.00165826	-0.00165894	-0.00165789	-0.00165955	-0.00165889	-0.00165868	-0.00165737	-0.00165857	-0.00165764	-0.00165816	-0.00165758		-70.0501	-70.0188	-70.0813	-69.9876	-70.1126	-70.0501	-70.0501	-69.9563	-70.0501	-69.9563	-70.0189	-69.9563
0.84	-0.0016575	-0.00165919	-0.0016583	-0.00165844	-0.00166006	-0.00165865	-0.00165805	-0.00165871	-0.00165755	-0.00165821	-0.00165832	-0.00165815		-69.9563	-70.0188	-69.9563	-69.9563	-70.0814	-69.9563	-69.925	-69.9876	-69.8938	-69.925	-69.9563	-69.925
0.86	-0.00165845	-0.00166013	-0.00165925	-0.00165901	-0.00165942	-0.00166077	-0.00165902	-0.00165888	-0.00165969	-0.00165917	-0.00165888	-0.00165873		-69.9563	-70.0188	-69.9563	-69.925	-69.9563	-70.0501	-69.925	-69.925	-69.9876	-69.925	-69.925	-69.8937
0.88	-0.00166018	-0.00166028	-0.00166099	-0.00166075	-0.00166154	-0.0016613	-0.00166231	-0.00166062	-0.00166141	-0.00165975	-0.00166023	-0.00166009		-70.0188	-69.9563	-70.0188	-69.9875	-70.05	-70.0188	-70.1126	-69.9875	-70.0501	-69.8937	-69.9562	-69.925
0.9	-0.00166072	-0.00166201	-0.00166269	-0.00166247	-0.00166246	-0.00166262	-0.00166205	-0.00166156	-0.00166194	-0.00166228	-0.00166119	-0.00166105		-69.9875	-70.0188	-70.0813	-70.05	-70.0501	-70.0501	-70.0188	-69.9875	-70.0187	-70.0188	-69.9562	-69.9249
0.92	-0.00166167	-0.00166256	-0.00166205	-0.00166378	-0.0016626	-0.00166354	-0.00166259	-0.00166251	-0.00166288	-0.00166204	-0.00166136	-0.00166163		-69.9875	-69.9875	-69.9562	-70.0813	-69.9875	-70.05	-69.9875	-69.9875	-70.0188	-69.925	-69.8937	-69.8937
0.94	-0.001663	-0.0016635	-0.00166378	-0.00166391	-0.00166432	-0.00166369	-0.00166392	-0.00166345	-0.00166342	-0.00166495	-0.00166428	-0.00166221		-70.0188	-69.9875	-70.0188	-70.0188	-70.0501	-69.9876	-70.0188	-69.9875	-69.9875	-70.0814	-70.05	-69.8624
0.96	-0.00166354	-0.00166522	-0.00166432	-0.00166406	-0.00166485	-0.00166424	-0.00166563	-0.00166439	-0.00166436	-0.00166469	-0.00166326	-0.00166203		-69.9875	-70.0501	-69.9875	-69.9562	-70.0187	-69.9562	-70.0813	-69.9875	-69.9875	-69.9875	-69.8937	-69.7686
0.98	-0.00166487	-0.00166536	-0.00166682	-0.00166618	-0.00166578	-0.00166597	-0.00166654	-0.00166494	-0.00166608	-0.00166603	-0.00166423	-0.00166266		-70.0188	-69.9875	-70.1126	-70.05	-70.0188	-70.0188	-70.0814	-69.9563	-70.05	-70.0188	-69.8937	-69.7373
1	-0.0016658	-0.00166669	-0.00166772	-0.00166633	-0.00166671	-0.00166651	-0.00166667	-0.00166667	-0.00166661	-0.00166813	-0.00166637	-0.00166486		-70.0188	-70.0188	-70.1126	-69.9875	-70.0188	-69.9876	-70.0188	-70.0188	-70.0188	-70.1126	-69.9875	-69.8312
1.02	-0.00166673	-0.00166762	-0.00166745	-0.00166688	-0.00166803	-0.00166823	-0.0016676	-0.00166721	-0.00166832	-0.00166902	-0.0016681	-0.00166585		-70.0188	-70.0188	-70.0188	-69.9563	-70.0501	-70.05	-70.0188	-69.9875	-70.0813	-70.1126	-70.0501	-69.8312
1.04	-0.00166688	-0.00166855	-0.0016676	-0.00166783	-0.00166778	-0.00166798	-0.00166619	-0.00166933	-0.00166767	-0.00166758	-0.00166745	-0.0016649		-69.9563	-70.0188	-69.9563	-69.9563	-69.9563	-69.9563	-69.8313	-70.0814	-69.9563	-69.925	-69.925	-69.6749
1.06	-0.00166744	-0.00166909	-0.00166855	-0.00166839	-0.00166951	-0.00166854	-0.00166836	-0.00166906	-0.00166784	-0.00166737	-0.00166842	-0.00166712		-69.925	-69.9875	-69.9563	-69.925	-70.0188	-69.925	-69.925	-69.9875	-69.8938	-69.8312	-69.925	-69.7686
1.08	-0.0016688	-0.00167042	-0.00166872	-0.00167013	-0.00167083	-0.00167067	-0.00167049	-0.00166961	-0.0016692	-0.00167032	-0.00167055	-0.00166814		-69.9563	-70.0188	-69.8937	-69.9876	-70.0501	-70.0189	-70.0188	-69.9563	-69.925	-69.9876	-70.0189	-69.7687
1.1	-0.00167053	-0.00167135	-0.00167086	-0.00167185	-0.00167292	-0.00167082	-0.00167024	-0.00167173	-0.00167055	-0.00167126	-0.00167343	-0.00166876		-70.0188	-70.0188	-69.9875	-70.0501	-70.1439	-69.9563	-69.925	-70.0501	-69.9563	-69.9876	-70.1751	-69.7374
1.12	-0.00167224	-0.00167189	-0.00167298	-0.00167238	-0.00167303	-0.00167412	-0.00167355	-0.00167304	-0.00167346	-0.00167415	-0.0016747	-0.00167096		-70.0813	-69.9875	-70.0813	-70.0188	-70.0813	-70.1438	-70.1126	-70.0813	-70.1126	-70.1439	-70.2064	-69.8312
1.14	-0.00167236	-0.00167282	-0.00167388	-0.00167331	-0.00167354	-0.00167383	-0.00167367	-0.00167356	-0.00167435	-0.00167504	-0.00167517	-0.00167195		-70.0188	-69.9875	-70.0813	-70.0188	-70.0501	-70.0501	-70.0501	-70.0501	-70.1126	-70.1438	-70.1752	-69.8311
1.16	-0.00167368	-0.00167455	-0.00167322	-0.00167384	-0.00167485	-0.00167475	-0.00167419	-0.00167487	-0.00167408	-0.00167553	-0.00167761	-0.00167217		-70.0501	-70.0501	-69.9563	-69.9876	-70.0814	-70.0501	-70.0188	-70.0813	-70.0189	-70.1127	-70.3002	-69.7687
1.18	-0.00167303	-0.00167507	-0.00167417	-0.00167361	-0.0016738	-0.00167527	-0.00167394	-0.00167538	-0.00167422	-0.00167486	-0.00167531	-0.00167279		-69.925	-70.0188	-69.9563	-69.8937	-69.925	-70.0188	-69.925	-70.0501	-69.9563	-69.9876	-70.0501	-69.7374
1.2	-0.00167439	-0.00167561	-0.00167551	-0.00167575	-0.00167515	-0.00167424	-0.00167608	-0.00167669	-0.00167595	-0.0016758	-0.0016774	-0.00167225		-69.9563	-69.9875	-69.9875	-69.9875	-69.9563	-69.8625	-70.0189	-70.0814	-70.0188	-69.9876	-70.144	-69.6124
1.22	-0.00167573	-0.00167654	-0.00167566	-0.00167669	-0.00167649	-0.00167639	-0.00167701	-0.00167681	-0.00167609	-0.00167712	-0.00167868	-0.00167567		-69.9875	-69.9875	-69.9249	-69.9875	-69.9875	-69.9562	-70.0188	-70.0188	-69.9562	-70.0187	-70.1751	-69.7999
1.24	-0.00167706	-0.00167748	-0.0016778	-0.00167881	-0.00167743	-0.00167813	-0.00167872	-0.00167891	-0.00167822	-0.00167844	-0.00167837	-0.00167549		-70.0188	-69.9875	-70.0188	-70.0814	-69.9875	-70.0188	-70.0814	-70.1126	-70.0501	-70.0501	-70.0813	-69.7061
1.26	-0.00167877	-0.00167881	-0.00167991	-0.00167971	-0.00167954	-0.00168023	-0.00167962	-0.00167941	-0.00167914	-0.00167975	-0.00168242	-0.00167771		-70.0813	-70.0188	-70.1126	-70.0813	-70.0813	-70.1126	-70.0813	-70.0813	-70.0501	-70.0813	-70.3315	-69.7998
1.28	-0.0016781	-0.00167934	-0.00167884	-0.00167865	-0.0016777	-0.00167837	-0.00167817	-0.00167993	-0.00167926	-0.00167869	-0.0016797	-0.00167793		-69.9563	-69.9875	-69.9563	-69.9251	-69.8625	-69.8937	-69.8938	-70.0501	-69.9875	-69.925	-70.0501	-69.7374
1.3	-0.00167983	-0.00168146	-0.00168135	-0.00168	-0.00167986	-0.00167974	-0.00167992	-0.00168045	-0.00167981	-0.00168122	-0.00167983	-0.00167934		-70.0188	-70.0813	-70.0813	-69.9563	-69.9563	-69.925	-69.9563	-70.0188	-69.9563	-70.05	-69.9875	-69.7686
1.32	-0.00168076	-0.00168197	-0.00168108	-0.00168134	-0.00168198	-0.00168187	-0.00168205	-0.00168098	-0.00168115	-0.00168174	-0.00168195	-0.00168114		-70.0188	-70.0501	-69.9875	-69.9875	-70.05	-70.0188	-70.0501	-69.9875	-69.9876	-70.0188	-70.0814	-69.8312
1.34	-0.00168247	-0.00168209	-0.0016828	-0.00168306	-0.00168289	-0.00168477	-0.00168375	-0.00168309	-0.00168405	-0.00168424	-0.00168246	-0.00168331		-70.0813	-69.9875	-70.05	-70.05	-70.05	-70.1751	-70.1125	-70.0813	-70.1439	-70.1439	-70.0501	-69.9249
1.36	-0.00168259	-0.00168303	-0.00168332	-0.00168358	-0.00168184	-0.00168367	-0.00168425	-0.00168242	-0.00168296	-0.00168355	-0.00168219	-0.00168269		-70.0188	-69.9875	-70.0188	-70.0188	-69.8937	-70.0188	-70.0814	-69.9563	-69.9875	-70.0188	-69.9563	-69.7999
1.38	-0.00168312	-0.00168475	-0.00168385	-0.00168411	-0.00168399	-0.00168341	-0.00168436	-0.00168376	-0.0016835	-0.00168486	-0.00168274	-0.0016829		-69.9875	-70.0501	-69.9875	-69.9875	-69.9875	-69.9249	-70.0188	-69.9875	-69.9563	-70.05	-69.925	-69.7373
1.4	-0.00168405	-0.00168567	-0.0016836	-0.00168347	-0.00168453	-0.00168476	-0.00168568	-0.0016843	-0.00168445	-0.0016846	-0.00168449	-0.00168393		-69.9875	-70.0501	-69.8937	-69.8624	-69.9562	-69.9563	-70.0501	-69.9563	-69.9563	-69.9563	-69.9875	-69.7374
1.42	-0.00168499	-0.00168579	-0.00168694	-0.00168642	-0.00168547	-0.00168531	-0.0016862	-0.00168604	-0.00168658	-0.00168554	-0.00168503	-0.00168534		-69.9875	-69.9875	-70.0813	-70.0188	-69.9562	-69.925	-70.0188	-70.0188	-70.0501	-69.9562	-69.9562	-69.7686
1.44	-0.00168632	-0.00168633	-0.00168586	-0.00168734	-0.0016876	-0.00168745	-0.00168712	-0.00168735	-0.00168709	-0.00168767	-0.00168755	-0.00168517		-70.0188	-69.9563	-69.925	-70.0188	-70.05	-70.0188	-70.0188	-70.0501	-70.0188	-70.0501	-70.0813	-69.6749
1.46	-0.00168684	-0.00168767	-0.001688	-0.00168866	-0.00168851	-0.00168837	-0.00168844	-0.00168866	-0.00168881	-0.0016874	-0.00168806	-0.00168542		-69.9875	-69.9875	-70.0187	-70.05	-70.05	-70.0188	-70.0501	-70.0813	-70.0813	-69.9562	-70.0501	-69.6123
1.48	-0.00168778	-0.0016886	-0.00168972	-0.00168799	-0.00168864	-0.0016889	-0.00168935	-0.00168759	-0.00168892	-0.00168834	-0.00168699	-0.00168609		-69.9875	-69.9875	-70.0813	-69.925	-69.9875	-69.9875	-70.05	-69.925	-70.0188	-69.9562	-69.8937	-69.5809
1.5	-0.00168871	-0.00168914	-0.00169062	-0.00168974	-0.00168917	-0.00169062	-0.00168947	-0.00168973	-0.00168865	-0.00168928	-0.00168796	-0.00168638		-69.9875	-69.9563	-70.0813	-69.9875	-69.9563	-70.05	-69.9875	-70.0188	-69.9249	-69.9562	-69.8937	-69.5184
1.52	-0.00169004	-0.00169048	-0.00169033	-0.00169186	-0.00168972	-0.00169074	-0.0016904	-0.00168946	-0.00169159	-0.00169102	-0.00168971	-0.00168708		-70.0188	-69.9875	-69.9875	-70.0814	-69.925	-69.9875	-69.9875	-69.925	-70.0813	-70.0188	-69.9563	-69.4871
1.54	-0.00169056	-0.00169141	-0.00169087	-0.00169117	-0.00169107	-0.00169167	-0.00169173	-0.00169081	-0.0016909	-0.00169194	-0.00169105	-0.0016878		-69.9875	-69.9875	-69.9563	-69.9562	-69.9563	-69.9875	-70.0188	-69.9563	-69.9562	-70.0188	-69.9875	-69.4559
1.56	-0.00169229	-0.00169274	-0.00169339	-0.0016937	-0.00169241	-0.00169419	-0.00169345	-0.00169215	-0.00169264	-0.00169405	-0.00169199	-0.00168734		-70.0501	-70.0188	-70.0814	-70.0814	-69.9875	-70.1126	-70.0814	-69.9875	-70.0188	-70.1127	-69.9876	-69.3309
1.58	-0.0016932	-0.00169366	-0.00169508	-0.0016946	-0.00169374	-0.00169389	-0.00169395	-0.00169269	-0.00169356	-0.00169494	-0.00169212	-0.00169049		-70.0501	-70.0188	-70.1439	-70.0814	-70.0188	-70.0188	-70.0501	-69.9563	-70.0188	-70.1127	-69.925	-69.4872
1.6	-0.00169371	-0.00169458	-0.00169398	-0.00169431	-0.00169466	-0.00169441	-0.00169565	-0.00169323	-0.00169448	-0.00169464	-0.00169268	-0.00169041		-70.0188	-70.0188	-69.9876	-69.9875	-70.0188	-69.9875	-70.1126	-69.925	-70.0188	-70.0188	-69.8937	-69.3933
1.62	-0.00169463	-0.0016951	-0.00169531	-0.00169682	-0.00169439	-0.00169614	-0.00169654	-0.00169418	-0.001695	-0.00169476	-0.00169285	-0.00169275		-70.0188	-69.9875	-70.0188	-70.1126	-69.925	-70.0501	-70.1126	-69.925	-69.9876	-69.9563	-69.8312	-69.4871
1.64	-0.00169476	-0.00169603	-0.00169504	-0.00169612	-0.00169494	-0.00169546	-0.00169544	-0.00169593	-0.00169435	-0.0016957	-0.00169305	-0.00169147		-69.9563	-69.9875	-69.9251	-69.9876	-69.8938	-69.925	-69.9563	-69.9876	-69.8625	-69.9563	-69.7687	-69.2996
1.66	-0.0016957	-0.00169736	-0.00169519	-0.00169547	-0.00169591	-0.00169681	-0.00169678	-0.00169646	-0.00169611	-0.00169625	-0.00169485	-0.00169464		-69.9563	-70.0188	-69.8625	-69.8625	-69.8938	-69.9563	-69.9875	-69.9563	-69.925	-69.925	-69.8312	-69.4559
1.68	-0.00169704	-0.00169828	-0.00169776	-0.00169763	-0.00169766	-0.00169775	-0.0016981	-0.0016982	-0.00169667	-0.0016976	-0.00169742	-0.00169496		-69.9875	-70.0188	-69.9875	-69.9563	-69.9563	-69.9562	-70.0188	-70.0187	-69.8937	-69.9562	-69.9562	-69.3933
1.7	-0.00169836	-0.00169999	-0.00169869	-0.00169897	-0.001699	-0.00169988	-0.00169743	-0.00169872	-0.00169843	-0.00169893	-0.00169836	-0.00169571		-70.0188	-70.0813	-69.9875	-69.9876	-69.9875	-70.0501	-69.8937	-69.9875	-69.9563	-69.9875	-69.9563	-69.3621
1.72	-0.00169889	-0.0016993	-0.00169922	-0.00170069	-0.00169874	-0.0016996	-0.00169959	-0.00169965	-0.00170016	-0.00169867	-0.00169811	-0.00169607		-69.9875	-69.9563	-69.9563	-70.05	-69.8937	-69.9563	-69.9875	-69.9875	-70.0188	-69.8937	-69.8624	-69.2995
1.74	-0.00170021	-0.00170143	-0.00170175	-0.0017016	-0.00170129	-0.00170173	-0.00170092	-0.00170098	-0.00170068	-0.00170122	-0.00169948	-0.00169805		-70.0188	-70.0501	-70.0813	-70.05	-70.0188	-70.0501	-70.0188	-70.0188	-69.9875	-70.0188	-69.8937	-69.3621
1.76	-0.00170073	-0.00170234	-0.00170026	-0.00170211	-0.00170141	-0.00170224	-0.00170223	-0.00170229	-0.00170041	-0.00170214	-0.00169925	-0.00169641		-69.9875	-70.0501	-69.8937	-70.0188	-69.9562	-70.0188	-70.05	-70.05	-69.8937	-70.0187	-69.7999	-69.1431
1.78	-0.00170126	-0.00170324	-0.00170241	-0.00170103	-0.00170156	-0.00170276	-0.00170075	-0.0017016	-0.00170217	-0.00170226	-0.00170104	-0.00169805		-69.9563	-70.0501	-69.9876	-69.8625	-69.8938	-69.9876	-69.8625	-69.925	-69.9563	-69.9563	-69.8625	-69.1745
1.8	-0.0017034	-0.00170415	-0.00170454	-0.0017044	-0.00170411	-0.00170408	-0.00170411	-0.00170415	-0.00170351	-0.001704	-0.0017036	-0.00170127		-70.0501	-70.0501	-70.0814	-70.0501	-70.0189	-70.0188	-70.0501	-70.0501	-69.9875	-70.0188	-69.9875	-69.3309
1.82	-0.00170311	-0.00170426	-0.00170304	-0.0017049	-0.00170423	-0.0017042	-0.00170262	-0.00170386	-0.00170284	-0.00170372	-0.00170294	-0.00170124		-69.9563	-69.9875	-69.8938	-70.0188	-69.9563	-69.9563	-69.8625	-69.9563	-69.8625	-69.9251	-69.8625	-69.237
1.84	-0.00170444	-0.00170518	-0.00170519	-0.00170702	-0.00170556	-0.00170514	-0.00170559	-0.0017044	-0.00170501	-0.00170546	-0.0017051	-0.00170284		-69.9875	-69.9875	-69.9875	-70.1126	-69.9875	-69.9562	-70.0188	-69.925	-69.9562	-69.9875	-69.9562	-69.2682
1.86	-0.00170577	-0.00170651	-0.00170612	-0.0017067	-0.00170809	-0.00170647	-0.00170611	-0.00170694	-0.00170635	-0.00170639	-0.00170604	-0.00170283		-70.0188	-70.0188	-69.9875	-70.0188	-70.1126	-69.9875	-69.9875	-70.0501	-69.9875	-69.9875	-69.9562	-69.1744
1.88	-0.00170669	-0.00170743	-0.00170705	-0.00170802	-0.00170777	-0.001709	-0.00170703	-0.00170785	-0.00170607	-0.00170692	-0.00170658	-0.00170365		-70.0188	-70.0188	-69.9875	-70.05	-70.0188	-70.1126	-69.9875	-70.0501	-69.8937	-69.9562	-69.925	-69.1432
1.9	-0.0017064	-0.00170834	-0.00170797	-0.00170812	-0.00170829	-0.00170788	-0.00170716	-0.00170755	-0.00170783	-0.00170705	-0.00170673	-0.00170489		-69.925	-70.0188	-69.9875	-69.9876	-69.9876	-69.9563	-69.925	-69.9562	-69.9563	-69.8937	-69.8624	-69.1431
1.92	-0.00170855	-0.00170886	-0.0017105	-0.00170945	-0.00171041	-0.00170962	-0.00170931	-0.00170969	-0.00170877	-0.00170841	-0.0017085	-0.00170572		-70.0188	-69.9875	-70.1126	-70.0188	-70.0813	-70.0188	-70.0188	-70.0501	-69.9563	-69.925	-69.925	-69.1119
1.94	-0.00170946	-0.00171018	-0.00171018	-0.00171076	-0.00171011	-0.00171053	-0.00170982	-0.00170979	-0.00171131	-0.00171096	-0.00170864	-0.00170657		-70.0188	-70.0188	-70.0188	-70.0501	-69.9876	-70.0188	-69.9875	-69.9875	-70.0814	-70.05	-69.8624	-69.0806
1.96	-0.00170958	-0.00171029	-0.00170989	-0.00171086	-0.00171023	-0.00171185	-0.00171035	-0.00171032	-0.0017106	-0.00170946	-0.00170801	-0.00170743		-69.9563	-69.9563	-69.925	-69.9875	-69.925	-70.0501	-69.9563	-69.9563	-69.9563	-69.8625	-69.7374	-69.0494
1.98	-0.00171051	-0.00171243	-0.00171164	-0.00171139	-0.00171158	-0.00171235	-0.00171048	-0.00171165	-0.00171153	-0.00171003	-0.00170822	-0.0017083		-69.9563	-70.0501	-69.9875	-69.9563	-69.9563	-70.0189	-69.8938	-69.9875	-69.9563	-69.8312	-69.6748	-69.0182
2	-0.00171145	-0.00171333	-0.00171176	-0.00171232	-0.00171211	-0.00171246	-0.00171224	-0.00171218	-0.00171367	-0.00171221	-0.00171046	-0.00170798		-69.9563	-70.0501	-69.925	-69.9563	-69.9251	-69.9563	-69.9563	-69.9563	-70.0501	-69.925	-69.7687	-68.893
2.02	-0.00171319	-0.00171384	-0.00171311	-0.00171446	-0.00171466	-0.0017142	-0.00171358	-0.00171471	-0.00171537	-0.00171476	-0.00171227	-0.00171052		-70.0188	-70.0188	-69.9563	-70.0501	-70.05	-70.0188	-69.9875	-70.0813	-70.1126	-70.0501	-69.8312	-68.9868
2.04	-0.0017137	-0.00171435	-0.00171445	-0.00171456	-0.00171476	-0.00171311	-0.0017161	-0.0017144	-0.00171425	-0.00171446	-0.00171164	-0.00171222		-69.9875	-69.9875	-69.9875	-69.9875	-69.9875	-69.8625	-70.1126	-69.9875	-69.9562	-69.9562	-69.7061	-69.0181
2.06	-0.00171462	-0.00171567	-0.00171537	-0.00171669	-0.00171568	-0.00171568	-0.00171618	-0.00171492	-0.00171438	-0.0017158	-0.00171427	-0.0017135		-69.9875	-70.0188	-69.9875	-70.0813	-69.9875	-69.9875	-70.05	-69.9563	-69.8937	-69.9875	-69.8311	-69.018
2.08	-0.00171635	-0.00171618	-0.0017175	-0.00171838	-0.00171821	-0.00171821	-0.00171708	-0.00171666	-0.00171775	-0.00171833	-0.00171565	-0.00171397		-70.0501	-69.9875	-70.0814	-70.1439	-70.1127	-70.1126	-70.0501	-70.0188	-70.0814	-70.1127	-69.8625	-68.9555
2.1	-0.00171725	-0.00171751	-0.00171839	-0.00171965	-0.00171749	-0.00171708	-0.00171839	-0.00171717	-0.00171783	-0.00172041	-0.00171541	-0.00171609		-70.0501	-70.0188	-70.0814	-70.1752	-69.9876	-69.9563	-70.0814	-69.9876	-70.0189	-70.2064	-69.7687	-69.0181
2.12	-0.00171815	-0.00171882	-0.00171807	-0.0017189	-0.00172002	-0.00171962	-0.00171887	-0.0017193	-0.00171995	-0.00172086	-0.00171681	-0.00171616		-70.0501	-70.0501	-69.9876	-70.0501	-70.1126	-70.0814	-70.0501	-70.0814	-70.1127	-70.1752	-69.8	-68.9243
2.14	-0.00171865	-0.00172012	-0.0017194	-0.0017198	-0.00172009	-0.00172011	-0.00171977	-0.00172059	-0.00172123	-0.00172171	-0.0017182	-0.00171829		-70.0188	-70.0813	-70.0188	-70.0501	-70.0501	-70.0501	-70.0501	-70.1126	-70.1438	-70.1752	-69.8311	-68.9868
2.16	-0.00172036	-0.0017198	-0.00172031	-0.0017215	-0.00172139	-0.001721	-0.00172147	-0.00172066	-0.0017221	-0.00172458	-0.00171878	-0.00171837		-70.0813	-69.9875	-70.0188	-70.1126	-70.0813	-70.05	-70.1125	-70.0501	-70.1439	-70.3314	-69.7999	-68.893
2.18	-0.00172004	-0.00172113	-0.00172041	-0.00172077	-0.00172228	-0.0017211	-0.00172235	-0.00172116	-0.00172175	-0.00172256	-0.00171977	-0.00171768		-69.9875	-70.0188	-69.9562	-69.9875	-70.0813	-69.9875	-70.1126	-70.0188	-70.0501	-70.1126	-69.7999	-68.7366
2.2	-0.00172056	-0.00172163	-0.00172175	-0.00172129	-0.00172035	-0.00172242	-0.00172283	-0.00172207	-0.00172185	-0.00172384	-0.00171834	-0.00171746		-69.9563	-69.9875	-69.9875	-69.9563	-69.8625	-70.0189	-70.0814	-70.0188	-69.9876	-70.144	-69.6124	-68.6116
2.22	-0.0017227	-0.00172255	-0.00172347	-0.00172343	-0.00172333	-0.00172414	-0.00172372	-0.00172298	-0.00172398	-0.00172592	-0.00172262	-0.00172052		-70.0501	-69.9875	-70.0501	-70.0501	-70.0188	-70.0814	-70.0814	-70.0188	-70.0813	-70.2377	-69.8625	-68.7366
2.24	-0.0017228	-0.00172347	-0.00172437	-0.00172312	-0.00172383	-0.00172462	-0.0017246	-0.00172389	-0.00172406	-0.00172433	-0.00172116	-0.00171989		-69.9875	-69.9875	-70.0501	-69.9562	-69.9875	-70.0501	-70.0813	-70.0188	-70.0188	-70.05	-69.6748	-68.5802
2.26	-0.00172372	-0.0017248	-0.00172446	-0.00172445	-0.00172516	-0.00172471	-0.00172428	-0.00172399	-0.00172456	-0.00172765	-0.00172259	-0.00172054		-69.9875	-70.0188	-69.9875	-69.9875	-70.0188	-69.9875	-69.9875	-69.9563	-69.9875	-70.2377	-69.706	-68.5177
2.28	-0.00172504	-0.00172571	-0.00172538	-0.00172456	-0.00172526	-0.00172523	-0.00172681	-0.00172613	-0.00172548	-0.00172687	-0.00172483	-0.00172122		-70.0188	-70.0188	-69.9876	-69.925	-69.9562	-69.9563	-70.1126	-70.05	-69.9875	-70.1126	-69.7999	-68.4552
2.3	-0.00172595	-0.00172742	-0.0017259	-0.00172591	-0.00172578	-0.00172616	-0.00172648	-0.00172582	-0.00172721	-0.00172613	-0.00172541	-0.00172192		-70.0188	-70.0813	-69.9563	-69.9563	-69.925	-69.9563	-70.0188	-69.9563	-70.05	-69.9875	-69.7686	-68.3926
2.32	-0.00172686	-0.0017271	-0.00172723	-0.00172805	-0.00172794	-0.0017283	-0.00172698	-0.00172715	-0.0017277	-0.00172826	-0.00172721	-0.00172468		-70.0188	-69.9875	-69.9875	-70.05	-70.0188	-70.0501	-69.9875	-69.9876	-70.0188	-70.0814	-69.8312	-68.4865
2.34	-0.00172776	-0.00172801	-0.00172815	-0.00172814	-0.00173006	-0.0017292	-0.0017283	-0.00172928	-0.00172942	-0.00172793	-0.00172859	-0.00172577		-70.0188	-69.9875	-69.9875	-69.9875	-70.1126	-70.05	-70.0188	-70.0814	-70.0814	-69.9876	-69.8624	-68.4552
2.36	-0.00172827	-0.00172893	-0.00172907	-0.00172744	-0.00172931	-0.00173009	-0.001728	-0.00172855	-0.00172909	-0.00172804	-0.00172834	-0.00172565		-69.9875	-69.9875	-69.9875	-69.8624	-69.9875	-70.0501	-69.925	-69.9562	-69.9875	-69.925	-69.7686	-68.3301
2.38	-0.00172959	-0.00173026	-0.00173039	-0.00173043	-0.00172982	-0.00173099	-0.00173015	-0.00172988	-0.00173122	-0.00172939	-0.00172933	-0.00172722		-70.0188	-70.0188	-70.0188	-70.0188	-69.9562	-70.0501	-70.0188	-69.9876	-70.0813	-69.9563	-69.7686	-68.3301
2.4	-0.00173131	-0.00173076	-0.00173049	-0.00173174	-0.00173197	-0.0017331	-0.00173146	-0.00173161	-0.0017317	-0.00173193	-0.00173114	-0.00173		-70.0813	-69.9875	-69.9562	-70.05	-70.0501	-70.1439	-70.0501	-70.0501	-70.0501	-70.0813	-69.8312	-68.4239
2.42	-0.00173016	-0.00173208	-0.00173141	-0.00173061	-0.00173043	-0.00173153	-0.00173114	-0.0017317	-0.00173057	-0.00173039	-0.00173049	-0.00172868		-69.925	-70.0188	-69.9563	-69.8937	-69.8625	-69.9563	-69.9563	-69.9876	-69.8937	-69.8937	-69.7061	-68.205
2.44	-0.00173273	-0.00173217	-0.00173356	-0.00173399	-0.00173383	-0.00173367	-0.00173369	-0.00173342	-0.00173395	-0.00173418	-0.00173151	-0.00173152		-70.0501	-69.9563	-70.0501	-70.0813	-70.0501	-70.0501	-70.0814	-70.0501	-70.0814	-70.1126	-69.7062	-68.2988
2.46	-0.0017324	-0.00173351	-0.00173405	-0.00173406	-0.00173391	-0.00173416	-0.00173417	-0.00173432	-0.00173281	-0.00173383	-0.0017309	-0.00172983		-69.9563	-69.9875	-70.0188	-70.0188	-69.9876	-70.0189	-70.0501	-70.0501	-69.925	-70.0189	-69.5811	-68.0487
2.48	-0.00173374	-0.00173564	-0.00173373	-0.00173456	-0.00173482	-0.00173547	-0.00173344	-0.00173481	-0.00173415	-0.00173311	-0.00173196	-0.0017307		-69.9875	-70.0813	-69.925	-69.9875	-69.9875	-70.05	-69.925	-70.0188	-69.9562	-69.8937	-69.5809	-67.9861
2.5	-0.00173425	-0.00173612	-0.00173508	-0.00173466	-0.00173615	-0.00173515	-0.00173519	-0.00173409	-0.00173467	-0.00173366	-0.00173181	-0.0017316		-69.9563	-70.0501	-69.9563	-69.9251	-70.0188	-69.9563	-69.9876	-69.8937	-69.925	-69.8625	-69.4872	-67.9236
2.52	-0.00173639	-0.0017366	-0.00173804	-0.00173601	-0.00173705	-0.00173689	-0.0017357	-0.00173788	-0.00173724	-0.00173624	-0.00173331	-0.00173499		-70.0501	-70.0188	-70.1127	-69.9563	-70.0188	-70.0188	-69.9563	-70.1126	-70.0501	-69.9876	-69.5184	-68.0487
2.54	-0.00173769	-0.00173792	-0.00173809	-0.00173815	-0.00173877	-0.00173901	-0.00173785	-0.00173794	-0.00173894	-0.00173837	-0.0017348	-0.00173667		-70.0813	-70.0501	-70.05	-70.0501	-70.0813	-70.1126	-70.0501	-70.05	-70.1126	-70.0813	-69.5497	-68.0486
2.56	-0.00173776	-0.00173881	-0.00173899	-0.00173782	-0.00173965	-0.00173907	-0.00173752	-0.00173802	-0.00173941	-0.00173763	-0.00173262	-0.00173836		-70.0188	-70.0501	-70.0501	-69.9562	-70.0813	-70.0501	-69.9562	-69.9875	-70.0814	-69.9563	-69.2996	-68.0487
2.58	-0.00173785	-0.0017397	-0.00173907	-0.00173834	-0.0017385	-0.00173874	-0.00173722	-0.00173812	-0.00173947	-0.00173693	-0.00173501	-0.00173882		-69.9563	-70.0501	-69.9876	-69.925	-69.925	-69.9563	-69.8625	-69.925	-70.0189	-69.8312	-69.3934	-67.9548
2.6	-0.00173918	-0.00173937	-0.00173957	-0.00174009	-0.00173984	-0.00174129	-0.00173859	-0.00173987	-0.00173997	-0.0017383	-0.00173573	-0.00174137		-69.9875	-69.9563	-69.9562	-69.9875	-69.9562	-70.0813	-69.8937	-69.9875	-69.9875	-69.8624	-69.362	-68.0173
2.62	-0.0017401	-0.0017407	-0.00174213	-0.00173979	-0.00174158	-0.00174217	-0.00173954	-0.00174037	-0.00174007	-0.00173845	-0.0017381	-0.00174225		-69.9875	-69.9875	-70.0813	-69.8937	-70.0188	-70.0813	-69.8937	-69.9563	-69.925	-69.7999	-69.4558	-67.9548
2.64	-0.00174101	-0.00174121	-0.00174219	-0.00174114	-0.00174166	-0.00174183	-0.00174211	-0.00174048	-0.00174182	-0.00173943	-0.00173758	-0.00174316		-69.9875	-69.9563	-70.0188	-69.925	-69.9562	-69.9875	-70.0188	-69.8937	-69.9875	-69.7999	-69.3308	-67.8922
2.66	-0.00174274	-0.00174213	-0.00174228	-0.00174289	-0.00174381	-0.00174397	-0.00174342	-0.00174306	-0.00174314	-0.00174204	-0.00174159	-0.00174656		-70.0501	-69.9563	-69.9563	-69.9876	-70.0501	-70.0813	-70.0501	-70.0188	-70.0188	-69.925	-69.5497	-68.0174
2.68	-0.00174281	-0.00174346	-0.0017432	-0.0017434	-0.00174348	-0.00174403	-0.0017439	-0.00174233	-0.00174322	-0.00174338	-0.00174062	-0.0017462		-69.9875	-69.9875	-69.9563	-69.9563	-69.9562	-70.0188	-70.0187	-69.8937	-69.9562	-69.9562	-69.3933	-67.861
2.7	-0.00174413	-0.00174438	-0.00174453	-0.00174473	-0.00174563	-0.0017433	-0.0017444	-0.00174409	-0.00174456	-0.00174431	-0.00174134	-0.00174839		-70.0188	-69.9875	-69.9876	-69.9875	-70.0501	-69.8937	-69.9875	-69.9563	-69.9875	-69.9563	-69.3621	-67.8923
2.72	-0.00174463	-0.00174488	-0.00174626	-0.00174441	-0.00174529	-0.00174547	-0.00174531	-0.00174583	-0.00174424	-0.001744	-0.00174166	-0.00174932		-69.9875	-69.9563	-70.05	-69.8937	-69.9563	-69.9875	-69.9875	-70.0188	-69.8937	-69.8624	-69.2995	-67.8297
2.74	-0.00174472	-0.00174621	-0.00174592	-0.00174577	-0.00174621	-0.00174556	-0.0017454	-0.0017451	-0.0017456	-0.00174414	-0.00174242	-0.0017507		-69.925	-69.9875	-69.9562	-69.925	-69.9563	-69.925	-69.925	-69.8937	-69.925	-69.7999	-69.2683	-67.7985
2.76	-0.0017477	-0.00174712	-0.00174889	-0.00174834	-0.00174918	-0.00174936	-0.0017492	-0.00174727	-0.00174898	-0.00174635	-0.00174319	-0.00175415		-70.0813	-69.9875	-70.1126	-70.05	-70.1126	-70.1438	-70.1438	-69.9875	-70.1125	-69.8937	-69.2369	-67.9235
2.78	-0.00174735	-0.00174844	-0.00174689	-0.00174759	-0.00174882	-0.00174694	-0.0017476	-0.00174818	-0.00174821	-0.00174729	-0.00174397	-0.00175507		-69.9875	-70.0188	-69.8937	-69.925	-70.0188	-69.8937	-69.9562	-69.9875	-69.9875	-69.8937	-69.2057	-67.861
2.8	-0.00174867	-0.00174975	-0.00174948	-0.00174934	-0.00174931	-0.00174952	-0.00174934	-0.00174868	-0.00174912	-0.00174905	-0.0017464	-0.00175601		-70.0188	-70.0501	-70.0188	-69.9876	-69.9875	-70.0188	-70.0188	-69.9562	-69.9875	-69.9562	-69.2996	-67.7985
2.82	-0.00174957	-0.00174941	-0.00175119	-0.00175066	-0.00175063	-0.00174919	-0.00175024	-0.00174919	-0.00175003	-0.00174957	-0.00174756	-0.00175823		-70.0188	-69.9563	-70.0813	-70.0188	-70.0188	-69.925	-70.0188	-69.925	-69.9876	-69.925	-69.2995	-67.8297
2.84	-0.00175047	-0.00175115	-0.00175289	-0.00175156	-0.00175112	-0.00175177	-0.00175032	-0.00175094	-0.00175135	-0.00175132	-0.00174872	-0.00175918		-70.0188	-70.0188	-70.1439	-70.0188	-69.9875	-70.0501	-69.9563	-69.9875	-70.0188	-69.9875	-69.2995	-67.7672
2.86	-0.00175178	-0.00175205	-0.00175251	-0.0017541	-0.00175244	-0.00175224	-0.00175288	-0.00175226	-0.00175225	-0.00175223	-0.00174865	-0.00176058		-70.0501	-70.0188	-70.0501	-70.1439	-70.0188	-70.0188	-70.0814	-70.0188	-70.0188	-69.9875	-69.2057	-67.736
2.88	-0.00175266	-0.00175295	-0.00175381	-0.00175372	-0.00175498	-0.00175314	-0.00175376	-0.00175193	-0.00175274	-0.00175273	-0.00174944	-0.00176116		-70.0501	-70.0188	-70.0813	-70.0501	-70.1439	-70.0188	-70.0814	-69.925	-69.9875	-69.9563	-69.1745	-67.6422
2.9	-0.00175314	-0.00175467	-0.00175469	-0.00175502	-0.0017546	-0.00175404	-0.00175422	-0.0017545	-0.00175365	-0.00175364	-0.00175148	-0.00176221		-70.0188	-70.0813	-70.0814	-70.0814	-70.0501	-70.0188	-70.05	-70.0501	-69.9875	-69.9562	-69.2369	-67.5796
2.92	-0.00175363	-0.00175554	-0.00175433	-0.00175548	-0.00175466	-0.00175452	-0.0017547	-0.00175375	-0.00175332	-0.00175374	-0.00175061	-0.00176328		-69.9875	-70.0813	-69.9875	-70.05	-69.9875	-69.9875	-70.0188	-69.925	-69.8937	-69.8937	-69.0806	-67.5169
2.94	-0.00175536	-0.00175601	-0.00175647	-0.00175596	-0.00175639	-0.00175584	-0.00175559	-0.00175714	-0.00175673	-0.00175468	-0.00175227	-0.00176605		-70.0501	-70.0501	-70.0814	-70.0189	-70.0501	-70.0188	-70.0188	-70.1127	-70.0813	-69.8937	-69.1119	-67.5795
2.96	-0.00175583	-0.00175607	-0.00175693	-0.00175644	-0.0017581	-0.00175674	-0.00175649	-0.00175677	-0.00175555	-0.00175439	-0.0017535	-0.00176712		-70.0188	-69.9875	-70.05	-69.9875	-70.1126	-70.0188	-70.0188	-70.0188	-69.925	-69.7999	-69.1119	-67.517
2.98	-0.00175591	-0.00175698	-0.00175659	-0.00175694	-0.00175773	-0.00175599	-0.00175697	-0.00175685	-0.00175525	-0.00175372	-0.0017535	-0.00176696		-69.9563	-69.9875	-69.9563	-69.9563	-70.0189	-69.8938	-69.9875	-69.9563	-69.8312	-69.6748	-69.0182	-67.3607
3	-0.00175765	-0.00175788	-0.00175833	-0.00175827	-0.00175862	-0.00175858	-0.00175829	-0.00175982	-0.00175827	-0.0017568	-0.00175395	-0.00176939		-70.0188	-69.9875	-70.0188	-69.9876	-70.0188	-70.0188	-70.0188	-70.1126	-69.9875	-69.8312	-68.9555	-67.3919
3.02	-0.00175854	-0.00175838	-0.00175963	-0.00175999	-0.00175952	-0.00175906	-0.00176001	-0.00176068	-0.00176	-0.00175776	-0.00175566	-0.00177181		-70.0188	-69.9563	-70.0501	-70.05	-70.0188	-69.9875	-70.0813	-70.1126	-70.0501	-69.8312	-68.9868	-67.4232
3.04	-0.00175944	-0.00176012	-0.00176011	-0.00176047	-0.00175877	-0.00176203	-0.00176006	-0.0017599	-0.00176006	-0.00175749	-0.00175777	-0.00177379		-70.0188	-70.0188	-70.0188	-70.0188	-69.8938	-70.1439	-70.0188	-69.9875	-69.9875	-69.7374	-69.0494	-67.4232
3.06	-0.00175992	-0.0017606	-0.00176182	-0.00176095	-0.00176094	-0.00176164	-0.00176013	-0.00175957	-0.00176096	-0.00175972	-0.00175861	-0.00177493		-69.9875	-69.9875	-70.0813	-69.9875	-69.9875	-70.05	-69.9563	-69.8937	-69.9875	-69.8311	-69.018	-67.3606
3.08	-0.00176083	-0.00176192	-0.0017627	-0.00176268	-0.00176267	-0.0017617	-0.00176105	-0.00176216	-0.00176269	-0.00176027	-0.00175823	-0.00177694		-69.9875	-70.0188	-70.0813	-70.0501	-70.05	-69.9875	-69.9562	-70.0188	-70.0501	-69.7999	-68.8929	-67.3607
3.1	-0.00176214	-0.00176323	-0.00176439	-0.00176233	-0.00176191	-0.00176343	-0.00176197	-0.00176264	-0.00176523	-0.00176042	-0.00176079	-0.00177685		-70.0188	-70.0501	-70.1439	-69.9563	-69.925	-70.0501	-69.9563	-69.9876	-70.1751	-69.7374	-68.9868	-67.2043
3.12	-0.00176263	-0.00176246	-0.00176318	-0.00176448	-0.00176407	-0.00176349	-0.00176371	-0.00176437	-0.00176524	-0.00176142	-0.00176042	-0.00177978		-69.9875	-69.925	-69.9875	-70.05	-70.0188	-69.9875	-70.0188	-70.0501	-70.1126	-69.7374	-68.8617	-67.2668
3.14	-0.00176353	-0.00176421	-0.0017645	-0.00176495	-0.00176496	-0.0017648	-0.00176543	-0.00176608	-0.00176651	-0.00176323	-0.001763	-0.00178016		-69.9875	-69.9875	-70.0188	-70.0188	-70.0188	-70.0188	-70.0813	-70.1125	-70.1439	-69.7998	-68.9555	-67.1417
3.16	-0.00176444	-0.00176429	-0.00176539	-0.00176543	-0.00176503	-0.0017657	-0.00176465	-0.00176611	-0.0017686	-0.00176297	-0.00176222	-0.00178312		-69.9875	-69.925	-70.0188	-69.9875	-69.9562	-70.0187	-69.9563	-70.0501	-70.2376	-69.7061	-68.7992	-67.2042
3.18	-0.00176617	-0.00176645	-0.0017667	-0.0017684	-0.00176719	-0.00176866	-0.00176721	-0.00176782	-0.00176859	-0.00176604	-0.00176358	-0.00178479		-70.0501	-70.0188	-70.0501	-70.1439	-70.0501	-70.1752	-70.0814	-70.1127	-70.1752	-69.8625	-68.7992	-67.173
3.2	-0.00176581	-0.00176693	-0.00176634	-0.00176552	-0.00176765	-0.00176825	-0.00176726	-0.00176702	-0.00176901	-0.00176368	-0.00176245	-0.00178437		-69.9563	-69.9875	-69.9563	-69.8625	-70.0189	-70.0814	-70.0188	-69.9876	-70.144	-69.6124	-68.6116	-66.9855
3.22	-0.00176755	-0.00176825	-0.00176808	-0.00176813	-0.00176896	-0.00176871	-0.00176773	-0.00176875	-0.00177069	-0.00176762	-0.00176513	-0.00178699		-70.0188	-70.0188	-70.0188	-69.9875	-70.0501	-70.0501	-69.9875	-70.05	-70.2064	-69.8312	-68.7053	-67.0167
3.24	-0.00176803	-0.00176956	-0.00176814	-0.00176903	-0.00176984	-0.00177	-0.00176905	-0.00176922	-0.00176944	-0.0017665	-0.00176486	-0.00178749		-69.9875	-70.0501	-69.9562	-69.9875	-70.0501	-70.0813	-70.0188	-70.0188	-70.05	-69.6748	-68.5802	-66.8916
3.26	-0.00176934	-0.00177002	-0.00176988	-0.00177076	-0.00177031	-0.00177004	-0.00176953	-0.00177011	-0.00177322	-0.00176835	-0.0017659	-0.00179059		-70.0188	-70.0188	-70.0188	-70.0501	-70.0188	-70.0188	-69.9876	-70.0188	-70.269	-69.7373	-68.549	-66.9541
3.28	-0.00176982	-0.00177008	-0.00176912	-0.00176998	-0.00176995	-0.00177176	-0.00177084	-0.00177017	-0.00177154	-0.00176976	-0.0017657	-0.00179154		-69.9875	-69.9563	-69.8937	-69.9249	-69.925	-70.0813	-70.0187	-69.9562	-70.0813	-69.7686	-68.4239	-66.8602
3.3	-0.00177197	-0.00177183	-0.00177171	-0.00177174	-0.00177212	-0.00177263	-0.00177174	-0.00177316	-0.00177199	-0.00177157	-0.00176763	-0.00179636		-70.0813	-70.0188	-70.0188	-69.9875	-70.0188	-70.0813	-70.0188	-70.1125	-70.05	-69.8311	-68.4551	-67.0478
3.32	-0.001772	-0.0017723	-0.00177302	-0.00177305	-0.00177343	-0.00177225	-0.00177221	-0.00177277	-0.00177329	-0.00177252	-0.00176955	-0.00179598		-70.0188	-69.9875	-70.05	-70.0188	-70.0501	-69.9875	-69.9876	-70.0188	-70.0814	-69.8312	-68.4865	-66.8603
3.34	-0.00177331	-0.00177362	-0.00177348	-0.0017756	-0.00177472	-0.00177399	-0.00177477	-0.00177491	-0.00177333	-0.00177431	-0.00177104	-0.0017974		-70.0501	-70.0188	-70.0188	-70.1439	-70.0813	-70.0501	-70.1127	-70.1127	-70.0189	-69.8937	-68.4865	-66.7978
3.36	-0.00177377	-0.00177451	-0.00177271	-0.00177479	-0.00177559	-0.00177362	-0.00177397	-0.00177452	-0.00177338	-0.001774	-0.00177086	-0.00179885		-70.0188	-70.0188	-69.8937	-70.0188	-70.0814	-69.9563	-69.9875	-70.0188	-69.9563	-69.7999	-68.3614	-66.7352
3.38	-0.00177425	-0.00177498	-0.00177489	-0.00177443	-0.00177562	-0.00177494	-0.00177445	-0.00177582	-0.00177388	-0.00177413	-0.00177157	-0.00180119		-69.9875	-69.9875	-69.9875	-69.9249	-70.0188	-69.9875	-69.9563	-70.05	-69.925	-69.7373	-68.2988	-66.7352
3.4	-0.00177598	-0.00177505	-0.00177621	-0.0017766	-0.00177776	-0.00177626	-0.0017762	-0.00177628	-0.00177646	-0.00177596	-0.00177439	-0.0018031		-70.0501	-69.925	-70.0188	-70.0189	-70.1127	-70.0189	-70.0189	-70.0189	-70.0501	-69.8	-68.3927	-66.704
3.42	-0.00177602	-0.00177722	-0.00177626	-0.00177624	-0.00177736	-0.00177715	-0.0017775	-0.00177634	-0.00177609	-0.00177651	-0.00177425	-0.00180417		-69.9875	-70.0188	-69.9562	-69.925	-70.0188	-70.0188	-70.0501	-69.9562	-69.9562	-69.7686	-68.2675	-66.6101
3.44	-0.00177692	-0.00177769	-0.001778	-0.00177799	-0.00177784	-0.00177804	-0.00177754	-0.00177808	-0.00177825	-0.00177582	-0.00177541	-0.00180615		-69.9875	-69.9875	-70.0187	-69.9875	-69.9875	-70.0188	-69.9875	-70.0188	-70.05	-69.6436	-68.2362	-66.5788
3.46	-0.00177741	-0.00177901	-0.00177889	-0.00177889	-0.00177915	-0.00177934	-0.00177928	-0.00177772	-0.00177871	-0.00177601	-0.0017745	-0.00180558		-69.9563	-70.0188	-70.0188	-69.9876	-70.0189	-70.0501	-70.0501	-69.925	-70.0189	-69.5811	-68.0487	-66.36
3.48	-0.00177915	-0.00177906	-0.00177978	-0.00178021	-0.00178087	-0.00177897	-0.00178015	-0.00177947	-0.00177835	-0.00177747	-0.00177576	-0.00180899		-70.0188	-69.9563	-70.0188	-70.0188	-70.0813	-69.9563	-70.0501	-69.9875	-69.925	-69.6122	-68.0174	-66.4225
3.5	-0.00178004	-0.0017808	-0.00178025	-0.00178193	-0.0017809	-0.00178113	-0.00177978	-0.00178037	-0.00177927	-0.00177767	-0.00177704	-0.00181021		-70.0188	-70.0188	-69.9876	-70.0813	-70.0188	-70.0501	-69.9562	-69.9875	-69.925	-69.5497	-67.9861	-66.3287
3.52	-0.00178051	-0.00178211	-0.0017799	-0.00178112	-0.00178095	-0.00177992	-0.00178194	-0.00178127	-0.00178019	-0.00177748	-0.00177875	-0.00181192		-69.9875	-70.0501	-69.8937	-69.9562	-69.9562	-69.8937	-70.05	-69.9875	-69.925	-69.4558	-67.9861	-66.2661
3.54	-0.00178224	-0.00178256	-0.0017825	-0.00178328	-0.00178353	-0.00178252	-0.00178239	-0.00178342	-0.00178278	-0.00177941	-0.00178088	-0.00181668		-70.0501	-70.0188	-70.0189	-70.0501	-70.0814	-70.0189	-70.0188	-70.0814	-70.0501	-69.5185	-68.0174	-66.4225
3.56	-0.0017827	-0.00178387	-0.00178255	-0.00178457	-0.00178398	-0.00178257	-0.00178286	-0.00178428	-0.0017824	-0.00177756	-0.001783	-0.00181618		-70.0188	-70.0501	-69.9562	-70.0813	-70.0501	-69.9562	-69.9875	-70.0814	-69.9563	-69.2996	-68.0487	-66.2036
3.58	-0.00178316	-0.00178432	-0.00178345	-0.00178377	-0.00178402	-0.00178264	-0.00178334	-0.00178473	-0.00178206	-0.00178038	-0.00178384	-0.00181709		-69.9875	-70.0188	-69.9562	-69.9562	-69.9875	-69.8937	-69.9562	-70.0501	-69.8624	-69.4246	-67.986	-66.0785
3.6	-0.00178448	-0.00178479	-0.0017852	-0.00178509	-0.00178659	-0.00178399	-0.00178509	-0.00178518	-0.00178342	-0.00178107	-0.00178639	-0.00181938		-70.0188	-69.9875	-70.0188	-69.9875	-70.1126	-69.925	-70.0188	-70.0188	-69.8937	-69.3933	-68.0486	-66.0472
3.62	-0.00178495	-0.00178694	-0.00178441	-0.00178641	-0.00178702	-0.00178449	-0.00178513	-0.00178482	-0.00178309	-0.00178302	-0.00178681	-0.00181995		-69.9875	-70.0813	-69.8937	-70.0188	-70.0813	-69.8937	-69.9563	-69.925	-69.7999	-69.4558	-67.9548	-65.8908
3.64	-0.00178584	-0.00178697	-0.00178576	-0.00178645	-0.00178663	-0.00178709	-0.0017852	-0.00178657	-0.00178406	-0.00178244	-0.00178769	-0.00182234		-69.9875	-70.0188	-69.925	-69.9562	-69.9875	-70.0188	-69.8937	-69.9875	-69.7999	-69.3308	-67.8922	-65.8595
3.66	-0.00178799	-0.00178743	-0.00178793	-0.00178903	-0.00178919	-0.00178881	-0.00178823	-0.0017883	-0.00178711	-0.00178693	-0.00179155	-0.00182606		-70.0813	-69.9875	-70.0188	-70.0813	-70.1125	-70.0813	-70.05	-70.05	-69.9562	-69.5809	-68.0486	-65.9221
3.68	-0.0017876	-0.00178791	-0.00178798	-0.00178822	-0.00178879	-0.00178884	-0.001787	-0.00178792	-0.00178802	-0.00178546	-0.0017907	-0.00182757		-69.9875	-69.9563	-69.9563	-69.9562	-70.0188	-70.0187	-69.8937	-69.9562	-69.9562	-69.3933	-67.861	-65.8283
3.7	-0.00178849	-0.00178881	-0.00178888	-0.00178996	-0.00178758	-0.00178888	-0.00178835	-0.00178882	-0.00178851	-0.00178574	-0.00179247	-0.00183044		-69.9875	-69.9563	-69.9562	-70.0188	-69.8624	-69.9562	-69.925	-69.9562	-69.925	-69.3308	-67.861	-65.8283
3.72	-0.00178855	-0.00179014	-0.00178811	-0.00178917	-0.00178936	-0.00178937	-0.00178969	-0.00178805	-0.00178775	-0.00178562	-0.00179296	-0.00183114		-69.925	-69.9875	-69.8312	-69.8938	-69.925	-69.925	-69.9563	-69.8312	-69.7999	-69.237	-67.7672	-65.672
3.74	-0.00178989	-0.00179103	-0.00179074	-0.00179136	-0.00179069	-0.00179071	-0.00179017	-0.00179068	-0.00178913	-0.00178764	-0.00179562	-0.00183585		-69.9563	-69.9875	-69.9563	-69.9876	-69.9563	-69.9563	-69.925	-69.9563	-69.8312	-69.2996	-67.8298	-65.797
3.76	-0.00179163	-0.00179277	-0.00179207	-0.00179309	-0.00179327	-0.00179329	-0.00179109	-0.00179284	-0.00179008	-0.00178711	-0.00179783	-0.0018383		-70.0188	-70.0501	-69.9875	-70.0501	-70.0813	-70.0813	-69.925	-70.05	-69.8312	-69.1744	-67.861	-65.7658
3.78	-0.00179293	-0.00179238	-0.00179296	-0.00179438	-0.00179246	-0.00179331	-0.00179369	-0.00179372	-0.00179271	-0.00178957	-0.00180045	-0.00184078		-70.0501	-69.9563	-69.9876	-70.0814	-69.9563	-70.0188	-70.0501	-70.0501	-69.9563	-69.2683	-67.9236	-65.7345
3.8	-0.00179254	-0.00179328	-0.00179301	-0.00179314	-0.00179336	-0.00179335	-0.00179246	-0.00179291	-0.00179277	-0.00179031	-0.00179963	-0.00184108		-69.9563	-69.9563	-69.9251	-69.925	-69.9563	-69.9563	-69.8937	-69.925	-69.8937	-69.2371	-67.736	-65.5469
3.82	-0.00179345	-0.00179502	-0.00179435	-0.00179447	-0.001793	-0.00179425	-0.00179296	-0.00179382	-0.00179328	-0.00179148	-0.00180188	-0.00184369		-69.9563	-70.0188	-69.9563	-69.9563	-69.8625	-69.9563	-69.8625	-69.9251	-69.8625	-69.237	-67.7672	-65.5157
3.84	-0.00179351	-0.00179591	-0.00179441	-0.00179412	-0.00179478	-0.00179348	-0.0017939	-0.00179432	-0.00179422	-0.00179181	-0.00180199	-0.00184501		-69.8937	-70.0188	-69.8937	-69.8624	-69.925	-69.8312	-69.8624	-69.8937	-69.8624	-69.1744	-67.6421	-65.3904
3.86	-0.0017957	-0.00179637	-0.00179786	-0.00179631	-0.00179611	-0.00179695	-0.0017961	-0.00179608	-0.00179599	-0.00179259	-0.00180429	-0.0018464		-69.9875	-69.9875	-70.0813	-69.9562	-69.9562	-70.0188	-69.9562	-69.9562	-69.9249	-69.1431	-67.6734	-65.2654
3.88	-0.00179617	-0.00179726	-0.00179703	-0.00179848	-0.0017966	-0.00179741	-0.00179532	-0.00179614	-0.00179607	-0.00179296	-0.00180444	-0.00184744		-69.9563	-69.9875	-69.9563	-70.0501	-69.925	-69.9876	-69.8312	-69.8937	-69.8625	-69.0807	-67.5484	-65.1091
3.9	-0.00179749	-0.00179899	-0.0017992	-0.00179893	-0.00179835	-0.00179872	-0.00179879	-0.00179791	-0.00179784	-0.00179588	-0.00180636	-0.00185078		-69.9875	-70.0501	-70.0501	-70.0188	-69.9875	-70.0187	-70.0188	-69.9562	-69.9249	-69.2056	-67.5483	-65.109
3.92	-0.0017988	-0.00179944	-0.00180049	-0.00179981	-0.00179966	-0.00180002	-0.00179883	-0.00179839	-0.00179876	-0.0017958	-0.00180827	-0.00185368		-70.0188	-70.0188	-70.0813	-70.0188	-70.0188	-70.0501	-69.9563	-69.925	-69.925	-69.1119	-67.5482	-65.0777
3.94	-0.00179926	-0.00180032	-0.00179966	-0.00180026	-0.0017997	-0.00179962	-0.001801	-0.00180057	-0.00179841	-0.00179618	-0.00180976	-0.00185882		-69.9875	-70.0188	-69.9563	-69.9875	-69.9562	-69.9562	-70.0501	-70.0187	-69.8311	-69.0493	-67.5169	-65.2028
3.96	-0.00179973	-0.00180077	-0.00180014	-0.001802	-0.0018006	-0.00180052	-0.0018006	-0.00179934	-0.00179809	-0.00179743	-0.00181084	-0.00186033		-69.9563	-69.9875	-69.925	-70.0501	-69.9563	-69.9563	-69.9563	-69.8625	-69.7374	-69.0494	-67.4545	-65.0778
3.98	-0.00180147	-0.00180208	-0.00180232	-0.00180329	-0.0018015	-0.00180269	-0.00180234	-0.0018007	-0.00179907	-0.0017991	-0.00181237	-0.0018637		-70.0188	-70.0188	-70.0188	-70.0814	-69.9563	-70.05	-70.0188	-69.8937	-69.7373	-69.0807	-67.4232	-65.0777
4	-0.00180193	-0.00180254	-0.00180235	-0.00180287	-0.00180282	-0.00180271	-0.00180406	-0.00180246	-0.0018009	-0.00179822	-0.00181349	-0.00186529		-69.9875	-69.9875	-69.9563	-69.9875	-69.9875	-69.9875	-70.0813	-69.9562	-69.7999	-68.9242	-67.3606	-64.9527
4.02	-0.00180282	-0.00180385	-0.00180409	-0.00180376	-0.00180329	-0.00180445	-0.00180492	-0.00180421	-0.00180185	-0.00179994	-0.00181593	-0.00186919		-69.9875	-70.0188	-70.0187	-69.9875	-69.9562	-70.05	-70.0813	-70.0188	-69.7999	-68.9555	-67.3919	-64.9839
4.04	-0.00180413	-0.00180473	-0.00180497	-0.00180338	-0.00180673	-0.00180489	-0.00180451	-0.00180466	-0.00180197	-0.00180249	-0.00181836	-0.00187085		-70.0188	-70.0188	-70.0188	-69.8938	-70.1439	-70.0188	-69.9875	-69.9875	-69.7374	-69.0494	-67.4232	-64.8589
4.06	-0.00180416	-0.00180603	-0.001805	-0.00180515	-0.00180587	-0.0018045	-0.0018037	-0.00180513	-0.00180379	-0.00180289	-0.00181904	-0.00187437		-69.9563	-70.0501	-69.9563	-69.9563	-70.0188	-69.9251	-69.8625	-69.9563	-69.7999	-68.9868	-67.3294	-64.8589
4.08	-0.00180464	-0.00180647	-0.00180633	-0.00180647	-0.00180547	-0.00180499	-0.00180591	-0.00180645	-0.0018039	-0.00180204	-0.00182064	-0.001877		-69.925	-70.0188	-69.9876	-69.9875	-69.925	-69.8937	-69.9563	-69.9876	-69.7374	-68.8304	-67.2982	-64.7964
4.1	-0.00180555	-0.00180777	-0.00180552	-0.00180524	-0.00180681	-0.00180548	-0.00180596	-0.00180861	-0.00180361	-0.00180423	-0.00182009	-0.00187878		-69.925	-70.0501	-69.8625	-69.8312	-69.9563	-69.8625	-69.8938	-70.0813	-69.6436	-68.893	-67.1105	-64.6713
4.12	-0.00180731	-0.00180779	-0.00180899	-0.00180873	-0.00180813	-0.00180853	-0.001809	-0.00180988	-0.00180589	-0.00180511	-0.00182439	-0.00188289		-69.9875	-69.9875	-70.05	-70.0188	-69.9875	-70.0188	-70.0501	-70.1126	-69.7374	-68.8617	-67.2668	-64.7025
4.14	-0.00180819	-0.0018091	-0.00180943	-0.0018096	-0.00180944	-0.00181026	-0.00181071	-0.00181115	-0.00180772	-0.00180771	-0.00182472	-0.00188609		-69.9875	-70.0188	-70.0188	-70.0188	-70.0188	-70.0813	-70.1125	-70.1439	-69.7998	-68.9555	-67.1417	-64.6712
4.16	-0.0018095	-0.0018104	-0.00181031	-0.00181005	-0.00181074	-0.00180984	-0.00181112	-0.00181367	-0.00180783	-0.00180729	-0.00182814	-0.00188975		-70.0188	-70.0501	-70.0188	-69.9875	-70.05	-69.9876	-70.0814	-70.2689	-69.7374	-68.8305	-67.2355	-64.6712
4.18	-0.00180995	-0.00181041	-0.00181203	-0.00181094	-0.00181245	-0.00181115	-0.00181155	-0.00181234	-0.00180965	-0.00180735	-0.00182848	-0.00189162		-69.9875	-69.9875	-70.0813	-69.9875	-70.1126	-70.0188	-70.0501	-70.1126	-69.7999	-68.7366	-67.1104	-64.5461
4.2	-0.00181042	-0.00181087	-0.00180991	-0.00181225	-0.00181287	-0.00181202	-0.00181157	-0.0018136	-0.00180806	-0.00180702	-0.00182889	-0.00189402		-69.9563	-69.9563	-69.8625	-70.0189	-70.0814	-70.0188	-69.9876	-70.144	-69.6124	-68.6116	-66.9855	-64.4523
4.22	-0.00181174	-0.00181219	-0.00181211	-0.00181312	-0.00181287	-0.00181204	-0.00181287	-0.00181486	-0.00181163	-0.0018093	-0.00183109	-0.00189604		-69.9875	-69.9875	-69.9562	-70.0188	-70.0188	-69.9562	-70.0187	-70.1751	-69.7999	-68.674	-66.9854	-64.3272
4.24	-0.00181347	-0.0018135	-0.00181429	-0.00181527	-0.00181544	-0.00181464	-0.0018146	-0.00181482	-0.00181174	-0.00181027	-0.00183286	-0.00190269		-70.0501	-70.0188	-70.0501	-70.1127	-70.1439	-70.0814	-70.0814	-70.1126	-69.7374	-68.6428	-66.9542	-64.5149
4.26	-0.00181391	-0.00181438	-0.00181515	-0.00181484	-0.00181457	-0.00181422	-0.0018146	-0.00181779	-0.00181271	-0.0018104	-0.00183508	-0.00190511		-70.0188	-70.0188	-70.0501	-70.0188	-70.0188	-69.9876	-70.0188	-70.269	-69.7373	-68.549	-66.9541	-64.421
4.28	-0.00181521	-0.0018144	-0.00181516	-0.00181528	-0.00181714	-0.00181637	-0.00181547	-0.00181687	-0.00181496	-0.001811	-0.00183687	-0.00190898		-70.0501	-69.9563	-69.9875	-69.9876	-70.1439	-70.0813	-70.0188	-70.1439	-69.8312	-68.4865	-66.9228	-64.4211
4.3	-0.00181564	-0.00181529	-0.00181519	-0.00181574	-0.00181627	-0.00181552	-0.00181677	-0.00181557	-0.00181505	-0.0018112	-0.00183998	-0.00191101		-70.0188	-69.9563	-69.925	-69.9563	-70.0188	-69.9563	-70.05	-69.9875	-69.7686	-68.3926	-66.9853	-64.2959
4.32	-0.00181694	-0.00181789	-0.0018178	-0.00181834	-0.00181714	-0.00181727	-0.00181763	-0.00181816	-0.00181729	-0.00181444	-0.00184088	-0.00191497		-70.0501	-70.0813	-70.0501	-70.0814	-70.0188	-70.0189	-70.0501	-70.1127	-69.8625	-68.5178	-66.8916	-64.296
4.34	-0.00181737	-0.00181746	-0.00181951	-0.00181876	-0.00181801	-0.00181899	-0.00181892	-0.00181729	-0.00181822	-0.00181504	-0.00184139	-0.00191847		-70.0188	-69.9875	-70.1126	-70.05	-70.0188	-70.0814	-70.0814	-69.9876	-69.8624	-68.4552	-66.7665	-64.2646
4.36	-0.00181867	-0.00181749	-0.0018195	-0.00182047	-0.00181846	-0.00181899	-0.00181934	-0.00181818	-0.00181872	-0.00181568	-0.00184371	-0.00191925		-70.0501	-69.925	-70.0501	-70.1127	-69.9876	-70.0188	-70.0501	-69.9876	-69.8312	-68.3927	-66.7665	-64.0458
4.38	-0.00181953	-0.0018201	-0.0018195	-0.00182088	-0.00182019	-0.00181986	-0.00182105	-0.00181906	-0.00181923	-0.00181677	-0.00184647	-0.00192341		-70.0501	-70.0501	-69.9875	-70.0814	-70.0501	-70.0189	-70.1126	-69.9876	-69.7999	-68.3614	-66.7978	-64.0458
4.4	-0.00182039	-0.00182054	-0.00182081	-0.00182216	-0.00182063	-0.00182073	-0.00182061	-0.00182079	-0.00182019	-0.00181874	-0.00184747	-0.00192711		-70.0501	-70.0188	-70.0189	-70.1127	-70.0189	-70.0189	-70.0189	-70.0501	-69.8	-68.3927	-66.704	-64.0145
4.42	-0.00182082	-0.00182098	-0.00182083	-0.00182214	-0.00182192	-0.00182245	-0.00182105	-0.0018208	-0.00182113	-0.00181897	-0.00184895	-0.00192945		-70.0188	-69.9875	-69.9563	-70.0501	-70.0501	-70.0814	-69.9875	-69.9875	-69.7999	-68.2988	-66.6414	-63.8894
4.44	-0.00182084	-0.00182186	-0.00182172	-0.00182172	-0.00182193	-0.00182159	-0.00182193	-0.00182211	-0.00181952	-0.00181924	-0.00185002	-0.0019342		-69.9563	-69.9875	-69.9563	-69.9563	-69.9876	-69.9563	-69.9876	-70.0188	-69.6124	-68.205	-66.5476	-63.9207
4.46	-0.00182173	-0.00182317	-0.00182304	-0.00182347	-0.00182366	-0.00182377	-0.00182196	-0.00182298	-0.00182012	-0.0018187	-0.00184984	-0.00193662		-69.9563	-70.0188	-69.9876	-70.0189	-70.0501	-70.0501	-69.925	-70.0189	-69.5811	-68.0487	-66.36	-63.7957
4.48	-0.00182305	-0.00182361	-0.00182392	-0.00182476	-0.00182281	-0.0018242	-0.00182329	-0.00182214	-0.00182114	-0.00181952	-0.00185283	-0.00194099		-69.9875	-69.9875	-69.9875	-70.05	-69.925	-70.0188	-69.9562	-69.8937	-69.5809	-67.9861	-66.3912	-63.7956
4.5	-0.00182393	-0.00182406	-0.00182566	-0.00182476	-0.00182499	-0.00182378	-0.00182418	-0.00182305	-0.00182132	-0.00182079	-0.00185405	-0.00194536		-69.9875	-69.9563	-70.05	-69.9875	-70.0188	-69.9249	-69.9562	-69.8937	-69.5184	-67.9548	-66.2974	-63.7955
4.52	-0.00182567	-0.00182496	-0.00182609	-0.00182607	-0.00182501	-0.00182725	-0.00182636	-0.00182525	-0.00182238	-0.00182381	-0.00185708	-0.00194881		-70.0501	-69.9563	-70.0188	-70.0188	-69.9563	-70.1126	-70.0501	-69.9876	-69.5184	-68.0487	-66.3287	-63.733
4.54	-0.00182567	-0.00182585	-0.00182653	-0.00182694	-0.0018259	-0.00182595	-0.00182678	-0.00182613	-0.00182258	-0.00182419	-0.00186009	-0.00195137		-69.9875	-69.9563	-69.9875	-70.0188	-69.9563	-69.9562	-70.0188	-69.9875	-69.4559	-67.9548	-66.3599	-63.6079
4.56	-0.0018274	-0.00182716	-0.00182912	-0.00182866	-0.00182722	-0.00182769	-0.00182894	-0.00182701	-0.00182194	-0.00182763	-0.00186088	-0.00195732		-70.0501	-69.9875	-70.1126	-70.0814	-69.9875	-70.0188	-70.1127	-69.9876	-69.3309	-68.08	-66.2349	-63.7018
4.58	-0.00182826	-0.00182847	-0.00182866	-0.00182908	-0.00182767	-0.00182856	-0.00182977	-0.00182703	-0.00182521	-0.00182886	-0.00186219	-0.00196131		-70.0501	-70.0188	-70.0188	-70.0501	-69.9563	-70.0188	-70.1127	-69.925	-69.4872	-68.0486	-66.1411	-63.6705
4.6	-0.00182826	-0.00182891	-0.00182867	-0.00183036	-0.0018277	-0.001829	-0.00182889	-0.00182707	-0.00182456	-0.0018301	-0.0018631	-0.00196251		-69.9875	-69.9875	-69.9562	-70.0813	-69.8937	-69.9875	-69.9875	-69.8624	-69.362	-68.0173	-66.0159	-63.4516
4.62	-0.00182914	-0.0018285	-0.00183042	-0.00183121	-0.00182861	-0.00182945	-0.00182891	-0.00182714	-0.00182696	-0.00183093	-0.00186409	-0.00196719		-69.9875	-69.8937	-70.0188	-70.0813	-69.8937	-69.9563	-69.925	-69.7999	-69.4558	-67.9548	-65.8908	-63.4516
4.64	-0.00183044	-0.00183027	-0.00183086	-0.00183119	-0.00183167	-0.00182991	-0.0018311	-0.00182852	-0.00182675	-0.00183221	-0.00186693	-0.00197093		-70.0188	-69.9563	-69.9875	-70.0188	-70.0501	-69.925	-70.0188	-69.8312	-69.3621	-67.9235	-65.8908	-63.3891
4.66	-0.00183088	-0.00183073	-0.00183174	-0.00183206	-0.00183166	-0.00183124	-0.0018311	-0.00182988	-0.00182958	-0.00183438	-0.00186888	-0.0019752		-69.9875	-69.925	-69.9875	-70.0187	-69.9875	-69.9562	-69.9562	-69.8624	-69.4871	-67.9548	-65.8283	-63.3577
4.68	-0.00183176	-0.00183206	-0.00183218	-0.00183292	-0.00183297	-0.00183127	-0.00183199	-0.00183209	-0.00182936	-0.00183479	-0.00187176	-0.0019776		-69.9875	-69.9563	-69.9562	-70.0188	-70.0187	-69.8937	-69.9562	-69.9562	-69.3933	-67.861	-65.8283	-63.2014
4.7	-0.00183349	-0.00183381	-0.00183479	-0.0018325	-0.00183384	-0.00183347	-0.00183374	-0.00183341	-0.00183046	-0.00183742	-0.00187553	-0.00198346		-70.0501	-70.0188	-70.0814	-69.925	-70.0188	-69.9876	-70.0188	-69.9876	-69.3934	-67.9236	-65.8909	-63.264
4.72	-0.00183392	-0.00183338	-0.00183434	-0.00183469	-0.0018347	-0.0018352	-0.00183332	-0.001833	-0.0018307	-0.00183829	-0.00187658	-0.00198737		-70.0188	-69.925	-69.9876	-70.0188	-70.0188	-70.0501	-69.925	-69.8937	-69.3308	-67.861	-65.7658	-63.2015
4.74	-0.00183435	-0.00183514	-0.00183565	-0.00183512	-0.00183513	-0.00183476	-0.00183507	-0.00183348	-0.00183182	-0.00184005	-0.0018804	-0.00199085		-69.9875	-69.9875	-70.0188	-69.9875	-69.9875	-69.9562	-69.9875	-69.8624	-69.3308	-67.861	-65.8282	-63.1076
4.76	-0.0018348	-0.00183516	-0.00183608	-0.00183643	-0.00183644	-0.00183436	-0.00183595	-0.00183311	-0.00182993	-0.00184094	-0.00188149	-0.00199443		-69.9563	-69.925	-69.9876	-70.0188	-70.0188	-69.8625	-69.9875	-69.7687	-69.1119	-67.7985	-65.7033	-63.0138
4.78	-0.00183612	-0.00183605	-0.00183739	-0.00183557	-0.00183644	-0.001837	-0.00183682	-0.00183578	-0.00183244	-0.0018436	-0.001884	-0.002		-69.9875	-69.925	-70.0188	-69.8937	-69.9562	-69.9875	-69.9875	-69.8937	-69.2057	-67.861	-65.6719	-63.045
4.8	-0.00183699	-0.00183738	-0.00183739	-0.00183777	-0.00183776	-0.00183702	-0.00183727	-0.00183712	-0.00183447	-0.00184405	-0.00188563	-0.00200603		-69.9875	-69.9563	-69.9562	-69.9875	-69.9875	-69.9249	-69.9562	-69.9249	-69.2683	-67.7672	-65.5781	-63.1076
4.82	-0.00183786	-0.0018387	-0.0018387	-0.00183735	-0.00183863	-0.00183748	-0.00183815	-0.00183759	-0.00183562	-0.0018463	-0.00188823	-0.0020096		-69.9875	-69.9875	-69.9875	-69.8937	-69.9875	-69.8937	-69.9563	-69.8937	-69.2682	-67.7984	-65.5469	-63.0138
4.84	-0.00183874	-0.00183957	-0.00183915	-0.00183998	-0.00183865	-0.00183925	-0.00183947	-0.00183936	-0.00183677	-0.00184721	-0.00189039	-0.00201182		-69.9875	-69.9875	-69.9562	-70.0188	-69.925	-69.9562	-69.9875	-69.9562	-69.2682	-67.7359	-65.4842	-62.8261
4.86	-0.00183918	-0.00184131	-0.0018396	-0.00183955	-0.00184041	-0.00183971	-0.00183948	-0.00183938	-0.00183576	-0.00184772	-0.00188989	-0.00201662		-69.9563	-70.0501	-69.925	-69.925	-69.9876	-69.925	-69.925	-69.8937	-69.1119	-67.6422	-65.2342	-62.7949
4.88	-0.0018405	-0.00184129	-0.00184265	-0.00184088	-0.00184171	-0.00183974	-0.00184038	-0.00184029	-0.00183697	-0.00184872	-0.00189181	-0.00202145		-69.9875	-69.9875	-70.0813	-69.9562	-70.0188	-69.8624	-69.9249	-69.8937	-69.1119	-67.5796	-65.1403	-62.7636
4.9	-0.00184137	-0.00184303	-0.00184263	-0.0018422	-0.00184257	-0.00184282	-0.0018417	-0.00184163	-0.00183947	-0.00185018	-0.0018947	-0.00202681		-69.9875	-70.0501	-70.0188	-69.9875	-70.0187	-70.0188	-69.9562	-69.9249	-69.2056	-67.5483	-65.109	-62.7636
4.92	-0.00184181	-0.00184345	-0.00184263	-0.00184264	-0.001843	-0.00184195	-0.00184129	-0.00184166	-0.00183848	-0.00185121	-0.0018967	-0.00203022		-69.9563	-70.0188	-69.9563	-69.9563	-69.9876	-69.8938	-69.8625	-69.8625	-69.0494	-67.4857	-65.0152	-62.6386
4.94	-0.00184313	-0.00184345	-0.00184394	-0.00184352	-0.00184344	-0.00184502	-0.00184437	-0.00184215	-0.00183972	-0.00185359	-0.00190284	-0.00203326		-69.9875	-69.9563	-69.9875	-69.9562	-69.9562	-70.0501	-70.0187	-69.8311	-69.0493	-67.5169	-65.2028	-62.4821
4.96	-0.00184357	-0.0018439	-0.00184568	-0.0018444	-0.00184432	-0.00184457	-0.00184307	-0.00184178	-0.00184095	-0.00185465	-0.00190433	-0.00203743		-69.9563	-69.925	-70.0501	-69.9563	-69.9563	-69.9563	-69.8625	-69.7374	-69.0494	-67.4545	-65.0778	-62.3884
4.98	-0.00184488	-0.00184565	-0.00184653	-0.00184485	-0.00184607	-0.00184588	-0.00184399	-0.00184231	-0.00184219	-0.00185573	-0.00190725	-0.00204366		-69.9875	-69.9875	-70.0501	-69.925	-70.0187	-69.9875	-69.8624	-69.706	-69.0494	-67.3919	-65.0464	-62.4196
5	-0.00184575	-0.00184609	-0.00184651	-0.00184661	-0.0018465	-0.00184805	-0.0018462	-0.00184459	-0.00184169	-0.00185728	-0.0019093	-0.00205084		-69.9875	-69.9563	-69.9875	-69.9875	-69.9875	-70.0813	-69.9562	-69.7999	-68.9242	-67.3606	-64.9527	-62.5134
5.02	-0.00184619	-0.00184741	-0.00184695	-0.00184662	-0.0018478	-0.00184846	-0.00184752	-0.0018451	-0.00184297	-0.00185929	-0.00191277	-0.00205351		-69.9563	-69.9875	-69.9563	-69.925	-70.0188	-70.0501	-69.9876	-69.7687	-68.9243	-67.3607	-64.9527	-62.3258
5.04	-0.00184837	-0.00184914	-0.0018474	-0.00185098	-0.00184909	-0.00184887	-0.00184882	-0.00184605	-0.00184643	-0.00186262	-0.00191533	-0.0020613		-70.0501	-70.0501	-69.9251	-70.1752	-70.0501	-70.0188	-70.0188	-69.7687	-69.0807	-67.4545	-64.8902	-62.4509
5.06	-0.00184879	-0.00184956	-0.00184959	-0.00185048	-0.00184907	-0.00184843	-0.00184968	-0.0018483	-0.00184721	-0.00186369	-0.00191931	-0.00206501		-70.0188	-70.0188	-70.0188	-70.0813	-69.9876	-69.925	-70.0188	-69.8624	-69.0493	-67.3919	-64.9214	-62.3258
5.08	-0.00184921	-0.00185085	-0.00185088	-0.00185001	-0.00184951	-0.00185062	-0.00185097	-0.00184834	-0.00184627	-0.00186524	-0.00192189	-0.00206935		-69.9875	-70.0501	-70.05	-69.9875	-69.9562	-70.0188	-70.0501	-69.7999	-68.8929	-67.3607	-64.8589	-62.232
5.1	-0.00185051	-0.00185039	-0.00184999	-0.00185175	-0.00185039	-0.00185105	-0.00185355	-0.00184842	-0.00184887	-0.00186504	-0.00192406	-0.00207528		-70.0188	-69.9563	-69.925	-70.0501	-69.9563	-69.9876	-70.1751	-69.7374	-68.9868	-67.2043	-64.7651	-62.232
5.12	-0.00185051	-0.00185214	-0.00185175	-0.00185129	-0.0018517	-0.00185235	-0.00185305	-0.00184895	-0.00184795	-0.00186757	-0.0019263	-0.00207722		-69.9563	-70.0188	-69.9876	-69.9563	-69.9876	-70.0189	-70.0814	-69.7062	-68.8305	-67.2356	-64.6713	-61.9818
5.14	-0.00185225	-0.00185343	-0.00185349	-0.00185347	-0.00185431	-0.00185494	-0.00185519	-0.00185165	-0.00185145	-0.00186876	-0.00193044	-0.00208592		-70.0188	-70.0501	-70.0501	-70.0501	-70.1126	-70.1438	-70.1752	-69.8311	-68.9868	-67.173	-64.7025	-62.1382
5.16	-0.00185268	-0.00185341	-0.00185303	-0.00185388	-0.00185296	-0.00185445	-0.00185685	-0.00185084	-0.0018501	-0.0018713	-0.00193318	-0.00209046		-69.9875	-69.9875	-69.9562	-70.0187	-69.9563	-70.0501	-70.2376	-69.7061	-68.7992	-67.2042	-64.6399	-62.0443
5.18	-0.00185354	-0.00185558	-0.00185434	-0.00185604	-0.00185471	-0.00185529	-0.00185589	-0.00185312	-0.00185056	-0.00187206	-0.0019355	-0.00209862		-69.9875	-70.0813	-69.9875	-70.1126	-70.0188	-70.0501	-70.1126	-69.7999	-68.7366	-67.1104	-64.5461	-62.1694
5.2	-0.00185528	-0.00185468	-0.00185695	-0.00185774	-0.00185687	-0.00185657	-0.00185846	-0.00185275	-0.00185149	-0.00187376	-0.00193928	-0.00210413		-70.0501	-69.9563	-70.1127	-70.1752	-70.1126	-70.0814	-70.2378	-69.7062	-68.7054	-67.0793	-64.5461	-62.1382
5.22	-0.00185569	-0.00185599	-0.0018569	-0.00185679	-0.00185595	-0.00185697	-0.00185879	-0.00185546	-0.00185286	-0.00187502	-0.00194028	-0.00210868		-70.0188	-69.9875	-70.0501	-70.0501	-69.9875	-70.05	-70.2064	-69.8312	-68.7053	-67.0167	-64.3585	-62.0444
5.24	-0.00185654	-0.00185729	-0.00185818	-0.00185851	-0.00185768	-0.00185781	-0.00185784	-0.00185465	-0.00185293	-0.00187587	-0.00194607	-0.00211433		-70.0188	-70.0188	-70.0814	-70.1126	-70.0501	-70.0501	-70.0813	-69.7061	-68.6115	-66.9229	-64.4836	-62.013
5.26	-0.0018574	-0.00185858	-0.00185814	-0.00185802	-0.00185766	-0.00185822	-0.00186129	-0.00185605	-0.00185347	-0.00187856	-0.00194897	-0.00211901		-70.0188	-70.0501	-70.0188	-70.0188	-69.9876	-70.0188	-70.269	-69.7373	-68.549	-66.9541	-64.421	-61.9192
5.28	-0.00185869	-0.00185855	-0.00185856	-0.00186062	-0.00185983	-0.00185908	-0.00186031	-0.00185832	-0.00185404	-0.00188033	-0.00195285	-0.00212634		-70.0501	-69.9875	-69.9876	-70.1439	-70.0813	-70.0188	-70.1439	-69.8312	-68.4865	-66.9228	-64.4211	-61.9818
5.3	-0.00185997	-0.00185942	-0.00185986	-0.00186056	-0.00185979	-0.00186124	-0.00185981	-0.00185924	-0.00185507	-0.00188435	-0.0019558	-0.00213157		-70.0813	-69.9875	-70.0188	-70.0813	-70.0188	-70.1125	-70.05	-69.8311	-68.4551	-67.0478	-64.3584	-61.9192
5.32	-0.00185993	-0.00186072	-0.00186115	-0.00186008	-0.00186021	-0.00186075	-0.00186109	-0.00186016	-0.00185699	-0.00188385	-0.00195833	-0.00213584		-70.0188	-70.0188	-70.0501	-69.9875	-69.9876	-70.0188	-70.0814	-69.8312	-68.4865	-66.8603	-64.2647	-61.7941
5.34	-0.00185947	-0.00186157	-0.00186068	-0.00186007	-0.00186107	-0.00186117	-0.0018593	-0.00186021	-0.00185671	-0.00188344	-0.00196093	-0.00213718		-69.925	-70.0188	-69.9562	-69.925	-69.9876	-69.9876	-69.8938	-69.7686	-68.3614	-66.6727	-64.1708	-61.4814
5.36	-0.00186167	-0.00186242	-0.0018633	-0.0018614	-0.00186194	-0.00186247	-0.00186107	-0.00186159	-0.00185824	-0.00188671	-0.00196266	-0.00214503		-70.0188	-70.0188	-70.0814	-69.9563	-69.9875	-70.0188	-69.9563	-69.7999	-68.3614	-66.7352	-64.0145	-61.544
5.38	-0.00186296	-0.00186284	-0.00186413	-0.00186358	-0.00186324	-0.00186463	-0.00186239	-0.00186253	-0.00185976	-0.00188995	-0.00196734	-0.00215231		-70.0501	-69.9875	-70.0814	-70.0501	-70.0189	-70.1126	-69.9876	-69.7999	-68.3614	-66.7978	-64.0458	-61.5753
5.4	-0.00186293	-0.00186327	-0.00186453	-0.00186311	-0.00186322	-0.00186326	-0.00186325	-0.00186259	-0.00186085	-0.00189001	-0.00197011	-0.00215904		-69.9875	-69.9563	-70.0501	-69.9563	-69.9563	-69.9563	-69.9875	-69.7374	-68.3301	-66.6414	-63.9519	-61.5752
5.42	-0.00186423	-0.00186414	-0.00186537	-0.0018653	-0.00186584	-0.00186457	-0.00186411	-0.00186442	-0.00186195	-0.00189241	-0.00197344	-0.00216422		-70.0188	-69.9563	-70.0501	-70.0501	-70.0814	-69.9875	-69.9875	-69.7999	-68.2988	-66.6414	-63.8894	-61.4814
5.44	-0.00186464	-0.00186545	-0.00186533	-0.0018657	-0.00186535	-0.00186587	-0.00186585	-0.00186316	-0.00186262	-0.0018939	-0.0019787	-0.00217108		-69.9875	-69.9875	-69.9875	-70.0188	-69.9875	-70.0188	-70.05	-69.6436	-68.2362	-66.5788	-63.9519	-61.4814
5.46	-0.00186594	-0.00186719	-0.00186751	-0.00186786	-0.00186797	-0.00186629	-0.00186713	-0.00186415	-0.00186244	-0.00189409	-0.00198154	-0.00217847		-70.0188	-70.0501	-70.0814	-70.1126	-70.1126	-69.9875	-70.0814	-69.6436	-68.1112	-66.4225	-63.8582	-61.5127
5.48	-0.00186679	-0.00186759	-0.00186833	-0.00186649	-0.00186791	-0.00186715	-0.00186577	-0.00186471	-0.00186276	-0.00189661	-0.00198542	-0.00218688		-70.0188	-70.0188	-70.0813	-69.9563	-70.0501	-69.9875	-69.925	-69.6122	-68.0174	-66.4225	-63.8269	-61.6066
5.5	-0.00186677	-0.00186844	-0.00186741	-0.0018678	-0.00186656	-0.00186714	-0.00186578	-0.00186396	-0.00186313	-0.00189688	-0.00198884	-0.00219309		-69.9563	-70.0188	-69.9563	-69.9876	-69.8937	-69.925	-69.8625	-69.4872	-67.9236	-66.2662	-63.7643	-61.5753
5.52	-0.00186895	-0.00186929	-0.00186916	-0.00186823	-0.00187052	-0.00186977	-0.00186844	-0.00186545	-0.00186662	-0.0019004	-0.00199279	-0.00220251		-70.0501	-70.0188	-70.0188	-69.9563	-70.1126	-70.0501	-69.9876	-69.5184	-68.0487	-66.3287	-63.733	-61.7316
5.54	-0.00186979	-0.00187058	-0.00187088	-0.00186998	-0.00187002	-0.00187105	-0.00187017	-0.00186649	-0.00186784	-0.00190433	-0.0019963	-0.00221125		-70.0501	-70.0501	-70.0814	-70.0189	-70.0188	-70.0814	-70.0501	-69.5185	-68.0174	-66.4225	-63.6705	-61.8568
5.56	-0.00187019	-0.00187185	-0.00187127	-0.00186995	-0.00187043	-0.00187187	-0.0018697	-0.00186446	-0.00186997	-0.00190369	-0.00200081	-0.00221453		-70.0188	-70.0813	-70.0501	-69.9562	-69.9875	-70.0814	-69.9563	-69.2996	-68.0487	-66.2036	-63.6705	-61.669
5.58	-0.00187104	-0.00187136	-0.00187167	-0.00187038	-0.00187129	-0.0018727	-0.00186969	-0.00186777	-0.00187119	-0.00190498	-0.00200485	-0.00222016		-70.0188	-69.9875	-70.0188	-69.925	-69.9875	-70.0814	-69.8937	-69.4559	-68.0173	-66.1098	-63.6392	-61.6065
5.6	-0.00187233	-0.00187266	-0.00187427	-0.0018717	-0.00187303	-0.00187309	-0.00187103	-0.0018684	-0.00187376	-0.00190724	-0.00200747	-0.00222693		-70.0501	-70.0188	-70.1439	-69.9563	-70.0501	-70.0501	-69.925	-69.4246	-68.0799	-66.0785	-63.5142	-61.6066
5.62	-0.00187229	-0.00187351	-0.0018742	-0.0018717	-0.00187255	-0.00187217	-0.00187015	-0.00186991	-0.00187364	-0.00190724	-0.00201116	-0.00222996		-69.9875	-70.0188	-70.0813	-69.8937	-69.9563	-69.925	-69.7999	-69.4558	-67.9548	-65.8908	-63.4516	-61.3876
5.64	-0.00187358	-0.00187392	-0.00187414	-0.00187478	-0.00187298	-0.00187437	-0.00187152	-0.00186965	-0.0018749	-0.00191009	-0.00201491	-0.00223539		-70.0188	-69.9875	-70.0188	-70.0501	-69.925	-70.0188	-69.8312	-69.3621	-67.9235	-65.8908	-63.3891	-61.2938
5.66	-0.00187355	-0.00187434	-0.00187455	-0.0018743	-0.00187386	-0.0018739	-0.00187244	-0.00187207	-0.00187663	-0.00191158	-0.00201871	-0.00224202		-69.9563	-69.9563	-69.9875	-69.9563	-69.925	-69.925	-69.8312	-69.4559	-67.9236	-65.7971	-63.3265	-61.2625
5.68	-0.00187574	-0.00187609	-0.00187673	-0.00187693	-0.00187518	-0.0018761	-0.00187599	-0.00187313	-0.00187836	-0.00191585	-0.00202258	-0.00225031		-70.0501	-70.0188	-70.0814	-70.0813	-69.9563	-70.0188	-70.0188	-69.4559	-67.9236	-65.8909	-63.264	-61.3251
5.7	-0.00187614	-0.00187737	-0.00187491	-0.00187643	-0.00187605	-0.0018765	-0.00187596	-0.00187287	-0.00187964	-0.00191824	-0.00202698	-0.00225529		-70.0188	-70.0501	-69.8937	-69.9875	-69.9563	-69.9875	-69.9563	-69.3621	-67.8923	-65.8596	-63.2327	-61.2
5.72	-0.00187654	-0.00187689	-0.00187713	-0.00187729	-0.0018778	-0.00187604	-0.00187551	-0.00187309	-0.00188049	-0.00191928	-0.00203092	-0.00226096		-69.9875	-69.9563	-69.9875	-69.9875	-70.0188	-69.8937	-69.8624	-69.2995	-67.8297	-65.7345	-63.1702	-61.1062
5.74	-0.0018774	-0.00187864	-0.00187798	-0.00187815	-0.00187777	-0.00187825	-0.00187641	-0.00187465	-0.0018827	-0.0019236	-0.00203493	-0.00226621		-69.9875	-70.0188	-69.9875	-69.9875	-69.9562	-69.9875	-69.8624	-69.3308	-67.861	-65.8282	-63.1076	-60.9811
5.76	-0.00187826	-0.00187948	-0.00187972	-0.00187989	-0.00187775	-0.00187955	-0.00187644	-0.00187311	-0.00188401	-0.00192512	-0.00203899	-0.00227325		-69.9875	-70.0188	-70.05	-70.05	-69.8937	-70.0187	-69.7999	-69.1431	-67.8297	-65.7345	-63.045	-60.9497
5.78	-0.00187912	-0.00188033	-0.00187835	-0.0018794	-0.00187997	-0.00187995	-0.00187868	-0.00187518	-0.00188623	-0.00192715	-0.00204409	-0.00227871		-69.9875	-70.0188	-69.8937	-69.9562	-69.9875	-69.9875	-69.8937	-69.2057	-67.861	-65.6719	-63.045	-60.8247
5.8	-0.00188041	-0.00188073	-0.00188101	-0.00188115	-0.00188038	-0.00188081	-0.00188046	-0.00187767	-0.00188709	-0.00192922	-0.00205067	-0.00228597		-70.0188	-69.9875	-70.0188	-70.0188	-69.9562	-69.9875	-69.9562	-69.2996	-67.7985	-65.6094	-63.1389	-60.7935
5.82	-0.00188126	-0.00188203	-0.00188053	-0.00188199	-0.00188081	-0.00188167	-0.00188088	-0.00187878	-0.00188932	-0.00193179	-0.00205422	-0.00229273		-70.0188	-70.0188	-69.925	-70.0188	-69.925	-69.9876	-69.925	-69.2995	-67.8297	-65.5782	-63.0451	-60.7309
5.84	-0.0018821	-0.00188243	-0.00188317	-0.00188195	-0.00188257	-0.00188296	-0.00188264	-0.0018799	-0.00189019	-0.00193392	-0.00205637	-0.00229957		-70.0188	-69.9875	-70.0501	-69.9563	-69.9875	-70.0188	-69.9875	-69.2995	-67.7672	-65.5155	-62.8574	-60.6683
5.86	-0.00188339	-0.00188373	-0.00188356	-0.00188459	-0.00188387	-0.00188381	-0.0018835	-0.0018797	-0.00189155	-0.00193425	-0.00206215	-0.00230762		-70.0501	-70.0188	-70.0188	-70.0814	-70.0188	-70.0188	-69.9875	-69.2057	-67.736	-65.328	-62.8887	-60.6684
5.88	-0.0018829	-0.00188501	-0.00188308	-0.00188408	-0.00188206	-0.00188288	-0.00188259	-0.00187909	-0.00189068	-0.00193424	-0.00206495	-0.00231345		-69.9563	-70.0501	-69.925	-69.9876	-69.8312	-69.8937	-69.8625	-69.0807	-67.5484	-65.1091	-62.7324	-60.5434
5.9	-0.00188464	-0.00188584	-0.00188528	-0.00188582	-0.00188607	-0.0018851	-0.00188481	-0.00188251	-0.00189303	-0.00193808	-0.00207136	-0.00232001		-70.0188	-70.0501	-70.0188	-70.05	-70.0501	-69.9875	-69.9562	-69.2369	-67.5796	-65.1403	-62.7949	-60.4495
5.92	-0.00188549	-0.00188623	-0.00188613	-0.00188665	-0.00188557	-0.00188507	-0.00188524	-0.00188188	-0.00189447	-0.0019405	-0.00207523	-0.0023295		-70.0188	-70.0188	-70.0188	-70.0501	-69.9563	-69.925	-69.925	-69.1119	-67.5482	-65.0777	-62.7011	-60.512
5.94	-0.00188589	-0.00188663	-0.00188608	-0.00188615	-0.00188776	-0.00188727	-0.00188479	-0.00188219	-0.00189593	-0.00194575	-0.0020772	-0.00233668		-69.9875	-69.9875	-69.9562	-69.9562	-70.0501	-70.0187	-69.8311	-69.0493	-67.5169	-65.2028	-62.4821	-60.4495
5.96	-0.00188674	-0.00188881	-0.00188739	-0.00188746	-0.00188771	-0.00188634	-0.00188482	-0.00188385	-0.00189741	-0.00194767	-0.00208188	-0.0023462		-69.9875	-70.0813	-69.9875	-69.9875	-69.9875	-69.8937	-69.7686	-69.0806	-67.4857	-65.109	-62.4196	-60.5119
5.98	-0.00188759	-0.00188919	-0.00188736	-0.00188875	-0.00188856	-0.00188679	-0.00188487	-0.00188462	-0.001898	-0.00195011	-0.00208763	-0.00235339		-69.9875	-70.0501	-69.925	-70.0187	-69.9875	-69.8624	-69.706	-69.0494	-67.3919	-65.0464	-62.4196	-60.4494
6	-0.00188889	-0.00188957	-0.00188956	-0.0018896	-0.00189118	-0.00188946	-0.0018876	-0.00188451	-0.00189999	-0.00195261	-0.00209539	-0.00236466		-70.0188	-70.0188	-70.0188	-70.0188	-70.1126	-69.9875	-69.8312	-68.9555	-67.3919	-64.984	-62.5447	-60.6058
6.02	-0.00188973	-0.00189041	-0.00188996	-0.00189132	-0.00189199	-0.0018912	-0.00188851	-0.00188621	-0.00190243	-0.00195654	-0.0020985	-0.00237117		-70.0188	-70.0188	-69.9875	-70.0813	-70.1126	-70.0501	-69.8312	-68.9868	-67.4232	-65.0152	-62.3883	-60.512
6.04	-0.00189146	-0.00189037	-0.00189391	-0.00189214	-0.00189191	-0.00189202	-0.00188897	-0.00188923	-0.0019053	-0.00195858	-0.00210581	-0.0023801		-70.0813	-69.9563	-70.2064	-70.0813	-70.05	-70.05	-69.7999	-69.1119	-67.4857	-64.9214	-62.4821	-60.5433
6.06	-0.00189183	-0.00189256	-0.00189335	-0.00189207	-0.00189141	-0.00189285	-0.00189123	-0.00188998	-0.00190633	-0.00196256	-0.00210949	-0.00238727		-70.0501	-70.0501	-70.1126	-70.0189	-69.9563	-70.0501	-69.8937	-69.0806	-67.4232	-64.9527	-62.3571	-60.4807
6.08	-0.00189133	-0.00189294	-0.00189194	-0.00189158	-0.00189271	-0.00189324	-0.00189034	-0.00188807	-0.00190695	-0.00196418	-0.00211279	-0.00239224		-69.9563	-70.0188	-69.9563	-69.925	-69.9876	-70.0189	-69.7687	-68.8617	-67.3295	-64.8277	-62.2008	-60.2931
6.1	-0.00189352	-0.0018929	-0.00189458	-0.00189334	-0.00189401	-0.00189674	-0.00189127	-0.0018916	-0.00190761	-0.0019673	-0.00211981	-0.00240152		-70.0501	-69.9563	-70.0814	-69.9876	-70.0189	-70.2064	-69.7687	-69.0181	-67.2356	-64.7964	-62.2633	-60.3244
6.12	-0.00189346	-0.00189465	-0.00189406	-0.00189463	-0.00189529	-0.00189618	-0.00189176	-0.0018906	-0.00191013	-0.00196949	-0.00212168	-0.0024096		-69.9875	-70.0188	-69.9875	-70.0188	-70.0501	-70.1126	-69.7374	-68.8617	-67.2668	-64.7025	-62.013	-60.293
6.14	-0.00189431	-0.00189548	-0.00189536	-0.00189636	-0.001897	-0.00189742	-0.00189359	-0.00189323	-0.00191038	-0.0019727	-0.00212942	-0.00241716		-69.9875	-70.0188	-70.0188	-70.0813	-70.1125	-70.1439	-69.7998	-68.9555	-67.1417	-64.6712	-62.1069	-60.2305
6.16	-0.00189561	-0.00189588	-0.00189664	-0.00189584	-0.00189736	-0.00189999	-0.00189362	-0.00189271	-0.00191385	-0.0019764	-0.00213503	-0.00242423		-70.0188	-69.9875	-70.05	-69.9876	-70.0814	-70.2689	-69.7374	-68.8305	-67.2355	-64.6712	-62.0756	-60.1368
6.18	-0.001896	-0.00189673	-0.00189835	-0.00189714	-0.00189773	-0.00189852	-0.00189545	-0.00189268	-0.00191411	-0.00197821	-0.00214273	-0.00243262		-69.9875	-69.9875	-70.1126	-70.0188	-70.0501	-70.1126	-69.7999	-68.7366	-67.1104	-64.5461	-62.1694	-60.1055
6.2	-0.00189685	-0.00189847	-0.00189916	-0.00189842	-0.00189811	-0.00190021	-0.00189415	-0.00189269	-0.00191488	-0.00198107	-0.00214725	-0.00244047		-69.9875	-70.0501	-70.1126	-70.05	-70.0188	-70.1752	-69.6436	-68.6428	-67.0167	-64.4835	-62.0756	-60.0429
6.22	-0.0018977	-0.00189885	-0.00189862	-0.00189791	-0.00189895	-0.00190099	-0.00189735	-0.00189453	-0.00191661	-0.00198255	-0.00215238	-0.00245079		-69.9875	-70.0188	-70.0188	-69.9562	-70.0187	-70.1751	-69.7999	-68.674	-66.9854	-64.3272	-62.0131	-60.1054
6.24	-0.00189854	-0.00190013	-0.00190035	-0.00189966	-0.00189979	-0.00189998	-0.00189649	-0.00189457	-0.00191745	-0.00198841	-0.00215811	-0.00245866		-69.9875	-70.0501	-70.0813	-70.0188	-70.0188	-70.05	-69.6748	-68.5802	-66.8916	-64.4523	-61.9817	-60.0429
6.26	-0.00189984	-0.00190051	-0.00190027	-0.00190005	-0.00190062	-0.00190393	-0.00189835	-0.00189554	-0.00192062	-0.00199181	-0.00216335	-0.00246664		-70.0188	-70.0188	-70.0188	-69.9876	-70.0188	-70.269	-69.7373	-68.549	-66.9541	-64.421	-61.9192	-59.9803
6.28	-0.00190067	-0.00190045	-0.00190244	-0.00190179	-0.00190101	-0.00190244	-0.00190018	-0.00189563	-0.00192192	-0.00199524	-0.00217023	-0.00247174		-70.0188	-69.9563	-70.1126	-70.05	-69.9875	-70.1126	-69.7999	-68.4552	-66.8915	-64.3898	-61.9505	-59.7615
6.3	-0.00190106	-0.00190086	-0.00190146	-0.00190083	-0.0019023	-0.00190102	-0.00190021	-0.00189576	-0.00192509	-0.00199725	-0.00217447	-0.00248374		-69.9875	-69.925	-69.9875	-69.925	-70.0187	-69.9562	-69.7373	-68.3613	-66.954	-64.2646	-61.8254	-59.8865
6.32	-0.00190191	-0.00190307	-0.00190186	-0.00190215	-0.00190269	-0.00190321	-0.00190204	-0.00189862	-0.00192549	-0.0020008	-0.0021799	-0.00249258		-69.9875	-70.0188	-69.9562	-69.9563	-69.9875	-70.0501	-69.7999	-68.4552	-66.829	-64.2334	-61.7628	-59.8553
6.34	-0.00190231	-0.00190346	-0.00190272	-0.0019039	-0.00190399	-0.00190225	-0.00190296	-0.0018992	-0.00192595	-0.00200438	-0.00218225	-0.00250088		-69.9563	-69.9875	-69.9563	-70.0189	-70.0189	-69.9251	-69.7999	-68.3927	-66.704	-64.2021	-61.5127	-59.7928
6.36	-0.00190361	-0.0019052	-0.00190313	-0.00190384	-0.00190437	-0.00190312	-0.00190342	-0.0018998	-0.00192831	-0.0020051	-0.0021891	-0.00250988		-69.9875	-70.0501	-69.925	-69.9562	-69.9875	-69.925	-69.7686	-68.3301	-66.7039	-63.9832	-61.5127	-59.7614
6.38	-0.00190491	-0.00190602	-0.00190534	-0.00190514	-0.00190656	-0.00190444	-0.00190435	-0.00190133	-0.00193159	-0.00200984	-0.00219647	-0.00251956		-70.0188	-70.0501	-70.0188	-69.9876	-70.0813	-69.9563	-69.7686	-68.3301	-66.7665	-64.0145	-61.544	-59.7615
6.4	-0.00190529	-0.00190684	-0.00190528	-0.00190554	-0.00190558	-0.00190574	-0.00190483	-0.00190286	-0.00193208	-0.00201311	-0.00220382	-0.00252803		-69.9875	-70.0501	-69.9563	-69.9563	-69.9563	-69.9875	-69.7374	-68.3301	-66.6414	-63.9519	-61.5752	-59.6989
6.42	-0.00190614	-0.00190722	-0.00190703	-0.00190774	-0.00190644	-0.00190614	-0.00190622	-0.00190349	-0.00193401	-0.00201595	-0.00220849	-0.00253539		-69.9875	-70.0188	-70.0188	-70.0501	-69.9562	-69.9562	-69.7686	-68.2675	-66.6101	-63.8581	-61.4501	-59.5739
6.44	-0.00190698	-0.0019076	-0.00190786	-0.00190766	-0.00190819	-0.00190833	-0.00190536	-0.0019046	-0.00193597	-0.00202176	-0.00221597	-0.00254786		-69.9875	-69.9875	-70.0188	-69.9875	-70.0188	-70.05	-69.6436	-68.2362	-66.5788	-63.9519	-61.4814	-59.6989
6.46	-0.00190783	-0.00190934	-0.00190959	-0.00190985	-0.00190812	-0.00190916	-0.00190588	-0.00190392	-0.00193564	-0.00202412	-0.00222289	-0.00255523		-69.9875	-70.0501	-70.0813	-70.0813	-69.9562	-70.0501	-69.6123	-68.0799	-66.3912	-63.8269	-61.4814	-59.5738
6.48	-0.00190822	-0.00190971	-0.00190772	-0.00190931	-0.00190853	-0.00190729	-0.00190597	-0.00190377	-0.00193772	-0.00202755	-0.00223088	-0.00256404		-69.9563	-70.0188	-69.8938	-69.9876	-69.925	-69.8625	-69.5497	-67.9549	-66.36	-63.7644	-61.5441	-59.5113
6.5	-0.00190953	-0.0019101	-0.00191038	-0.00190926	-0.00190985	-0.00190863	-0.00190654	-0.00190547	-0.00193936	-0.00203248	-0.00223882	-0.00257607		-69.9875	-69.9875	-70.0188	-69.9249	-69.9562	-69.8937	-69.5184	-67.9548	-66.2974	-63.7955	-61.6065	-59.6051
6.52	-0.00191082	-0.00191094	-0.00190987	-0.00191237	-0.0019116	-0.0019104	-0.00190711	-0.00190808	-0.00194196	-0.00203545	-0.00224723	-0.00258486		-70.0188	-69.9875	-69.925	-70.0813	-70.0188	-69.9563	-69.4871	-68.0174	-66.2974	-63.7017	-61.7003	-59.5426
6.54	-0.0019112	-0.00191223	-0.00191119	-0.00191138	-0.00191243	-0.0019117	-0.0019077	-0.00190885	-0.00194549	-0.0020385	-0.00225555	-0.002595		-69.9875	-70.0188	-69.9563	-69.9562	-70.0188	-69.9875	-69.4559	-67.9548	-66.3599	-63.6079	-61.7942	-59.5425
6.56	-0.00191204	-0.00191306	-0.00191159	-0.00191224	-0.00191371	-0.00191165	-0.00190606	-0.00191146	-0.00194527	-0.00204358	-0.00225943	-0.00260768		-69.9875	-70.0188	-69.9249	-69.9562	-70.0501	-69.925	-69.2683	-68.0174	-66.1723	-63.6392	-61.6377	-59.6676
6.58	-0.00191244	-0.00191299	-0.00191156	-0.00191264	-0.00191408	-0.00191117	-0.00190897	-0.00191223	-0.0019461	-0.00204717	-0.00226458	-0.00261577		-69.9563	-69.9563	-69.8625	-69.925	-70.0189	-69.8312	-69.3934	-67.9548	-66.0473	-63.5767	-61.544	-59.5739
6.6	-0.00191329	-0.00191519	-0.00191245	-0.00191396	-0.00191401	-0.00191207	-0.00190915	-0.00191439	-0.00194793	-0.00204934	-0.00227093	-0.00262655		-69.9563	-70.0501	-69.8625	-69.9563	-69.9563	-69.8312	-69.3308	-67.9861	-65.9847	-63.4204	-61.5128	-59.6052
6.62	-0.00191369	-0.00191556	-0.00191289	-0.00191391	-0.00191352	-0.00191163	-0.00191114	-0.00191472	-0.0019484	-0.00205362	-0.00227459	-0.00263475		-69.925	-70.0188	-69.8312	-69.8938	-69.8625	-69.7374	-69.3933	-67.8923	-65.8283	-63.3891	-61.3251	-59.5113
6.64	-0.00191591	-0.00191639	-0.00191693	-0.00191523	-0.00191665	-0.00191391	-0.00191176	-0.0019169	-0.00195222	-0.00205841	-0.00228121	-0.00264823		-70.0188	-70.0188	-70.0501	-69.925	-70.0188	-69.8312	-69.3621	-67.9235	-65.8908	-63.3891	-61.2938	-59.6676
6.66	-0.00191584	-0.00191677	-0.0019164	-0.0019161	-0.00191613	-0.00191481	-0.00191419	-0.00191862	-0.00195368	-0.00206223	-0.00228788	-0.00265442		-69.9563	-69.9875	-69.9563	-69.925	-69.925	-69.8312	-69.4559	-67.9236	-65.7971	-63.3265	-61.2625	-59.4801
6.68	-0.00191759	-0.00191851	-0.0019186	-0.00191696	-0.00191789	-0.00191795	-0.00191479	-0.00191988	-0.00195753	-0.0020656	-0.0022957	-0.00266479		-70.0188	-70.0501	-70.05	-69.925	-69.9875	-69.9875	-69.4246	-67.8923	-65.8596	-63.2327	-61.2938	-59.48
6.7	-0.00191886	-0.00191753	-0.00191897	-0.00191872	-0.00191918	-0.00191879	-0.00191539	-0.00192207	-0.00196087	-0.00207104	-0.00230183	-0.00267517		-70.0501	-69.925	-70.0188	-69.9876	-70.0188	-69.9876	-69.3934	-67.9236	-65.8909	-63.264	-61.2313	-59.4801
6.72	-0.00191923	-0.00191974	-0.00191979	-0.00192046	-0.00191866	-0.00191828	-0.00191556	-0.00192288	-0.00196185	-0.00207497	-0.00230748	-0.00268427		-70.0188	-70.0188	-70.0188	-70.0501	-69.925	-69.8937	-69.3308	-67.861	-65.7658	-63.2015	-61.1375	-59.4174
6.74	-0.00191961	-0.00192011	-0.00192017	-0.00191993	-0.00192042	-0.00191871	-0.00191666	-0.00192463	-0.00196572	-0.00207846	-0.00231214	-0.00269219		-69.9875	-69.9875	-69.9875	-69.9562	-69.9875	-69.8624	-69.3308	-67.861	-65.8282	-63.1076	-60.9811	-59.2923
6.76	-0.00191955	-0.00192095	-0.00192101	-0.00191898	-0.00192081	-0.00191779	-0.00191415	-0.00192501	-0.00196628	-0.00208153	-0.00231812	-0.00269968		-69.925	-69.9875	-69.9875	-69.8312	-69.9562	-69.7374	-69.0806	-67.7672	-65.672	-62.9825	-60.8872	-59.136
6.78	-0.00192176	-0.00192089	-0.00192185	-0.00192258	-0.00192256	-0.00192143	-0.0019176	-0.00192862	-0.00196974	-0.00208823	-0.00232534	-0.00271137		-70.0188	-69.925	-69.9875	-70.0188	-70.0188	-69.925	-69.237	-67.8923	-65.7032	-63.0763	-60.856	-59.1673
6.8	-0.00192258	-0.0019231	-0.00192314	-0.0019225	-0.00192293	-0.00192274	-0.00191963	-0.00192899	-0.00197131	-0.00209434	-0.00233205	-0.00272237		-70.0188	-70.0188	-70.0188	-69.9562	-69.9875	-69.9562	-69.2996	-67.7985	-65.6094	-63.1389	-60.7935	-59.1673
6.82	-0.00192431	-0.00192348	-0.00192486	-0.0019238	-0.00192467	-0.00192404	-0.00192164	-0.00193213	-0.00197482	-0.00209889	-0.00233998	-0.00273141		-70.0813	-69.9875	-70.0813	-69.9875	-70.0501	-69.9875	-69.362	-67.8922	-65.6407	-63.1076	-60.7934	-59.0734
6.84	-0.00192376	-0.00192476	-0.00192341	-0.00192418	-0.00192458	-0.00192442	-0.00192136	-0.00193158	-0.00197549	-0.00209944	-0.00234509	-0.00274195		-69.9875	-70.0188	-69.925	-69.9562	-69.9875	-69.9562	-69.2682	-67.7359	-65.4842	-62.8261	-60.637	-59.0421
6.86	-0.00192505	-0.00192514	-0.00192607	-0.00192548	-0.00192542	-0.00192527	-0.00192112	-0.00193293	-0.00197579	-0.0021053	-0.00235324	-0.0027519		-70.0188	-69.9875	-70.0501	-69.9875	-69.9875	-69.9562	-69.1744	-67.7047	-65.2967	-62.8574	-60.6371	-58.9797
6.88	-0.00192632	-0.00192643	-0.00192734	-0.00192542	-0.00192625	-0.00192612	-0.00192228	-0.00193384	-0.00197763	-0.00211013	-0.0023614	-0.00276531		-70.0501	-70.0188	-70.0814	-69.925	-69.9875	-69.9563	-69.1745	-67.6422	-65.2029	-62.8262	-60.6372	-59.0735
6.9	-0.00192623	-0.0019268	-0.00192723	-0.00192763	-0.00192664	-0.00192651	-0.00192388	-0.00193432	-0.00197953	-0.00211448	-0.00236558	-0.00277322		-69.9875	-69.9875	-70.0187	-70.0188	-69.9562	-69.9249	-69.2056	-67.5483	-65.109	-62.7636	-60.4182	-58.9171
6.92	-0.00192707	-0.00192763	-0.00192806	-0.0019271	-0.00192658	-0.00192692	-0.00192322	-0.00193576	-0.00198197	-0.00211839	-0.00237521	-0.00278411		-69.9875	-69.9875	-70.0188	-69.925	-69.8937	-69.8937	-69.0806	-67.5169	-65.0464	-62.6698	-60.4807	-58.8858
6.94	-0.00192881	-0.00192892	-0.00192888	-0.00193067	-0.00193016	-0.00192779	-0.00192486	-0.0019386	-0.00198872	-0.00212188	-0.00238419	-0.0027944		-70.0501	-70.0188	-70.0188	-70.1127	-70.0813	-69.8937	-69.1119	-67.5795	-65.2654	-62.5447	-60.5121	-58.8233
6.96	-0.00192917	-0.00192974	-0.0019297	-0.0019301	-0.0019287	-0.0019273	-0.00192604	-0.00193957	-0.0019901	-0.002126	-0.00239314	-0.00280617		-70.0188	-70.0188	-70.0188	-70.0188	-69.925	-69.7999	-69.1119	-67.517	-65.1403	-62.4509	-60.5432	-58.8233
6.98	-0.00192999	-0.00192966	-0.00193098	-0.00193092	-0.00192911	-0.00192731	-0.00192677	-0.00194011	-0.00199251	-0.00213176	-0.00240033	-0.00281797		-70.0188	-69.9563	-70.05	-70.0188	-69.8937	-69.7373	-69.0807	-67.4232	-65.0777	-62.4509	-60.4807	-58.8233
7	-0.00193126	-0.00193186	-0.00193179	-0.00193356	-0.00193179	-0.00193005	-0.0019266	-0.00194207	-0.00199497	-0.00213957	-0.00241168	-0.00283184		-70.0501	-70.0501	-70.0501	-70.1439	-70.0188	-69.8625	-68.9868	-67.4232	-65.0153	-62.576	-60.6371	-58.9172
7.02	-0.00193207	-0.00193222	-0.0019335	-0.00193433	-0.00193352	-0.00193093	-0.00192829	-0.0019445	-0.00199891	-0.00214263	-0.00241817	-0.00284213		-70.0501	-70.0188	-70.1126	-70.1439	-70.0814	-69.8625	-69.0181	-67.4545	-65.0465	-62.4196	-60.5433	-58.8546
7.04	-0.00193107	-0.0019335	-0.00193157	-0.00193148	-0.00193159	-0.00192864	-0.0019286	-0.00194461	-0.00199805	-0.00214689	-0.00242363	-0.00285255		-69.925	-70.0501	-69.925	-69.8937	-69.8937	-69.6436	-68.9556	-67.3294	-64.7651	-62.3258	-60.387	-58.792
7.06	-0.00193238	-0.00193385	-0.00193243	-0.0019319	-0.00193337	-0.00193187	-0.0019303	-0.00194662	-0.00200312	-0.00215176	-0.00243224	-0.00286449		-69.9563	-70.0188	-69.9251	-69.8625	-69.9563	-69.7999	-68.9868	-67.3294	-64.8589	-62.2633	-60.3869	-58.7921
7.08	-0.00193413	-0.00193467	-0.00193419	-0.0019355	-0.00193603	-0.00193322	-0.00193062	-0.00194956	-0.00200718	-0.00215774	-0.00244027	-0.00287923		-70.0188	-70.0188	-69.9875	-70.0501	-70.0814	-69.8312	-68.9242	-67.392	-64.8902	-62.2633	-60.3556	-58.9171
7.1	-0.0019345	-0.00193549	-0.00193412	-0.00193494	-0.00193773	-0.0019323	-0.00193233	-0.00194831	-0.00200833	-0.00216268	-0.00244717	-0.00288748		-69.9875	-70.0188	-69.925	-69.9563	-70.1438	-69.7061	-68.9555	-67.173	-64.7338	-62.2007	-60.2618	-58.7607
7.12	-0.00193533	-0.00193586	-0.00193633	-0.00193715	-0.00193805	-0.00193369	-0.00193221	-0.00195179	-0.00201152	-0.0021656	-0.00245659	-0.00290024		-69.9875	-69.9875	-70.0188	-70.0501	-70.1126	-69.7374	-68.8617	-67.2668	-64.7025	-62.013	-60.293	-58.792
7.14	-0.00193616	-0.00193714	-0.00193806	-0.00193886	-0.00193929	-0.00193553	-0.00193486	-0.00195199	-0.00201473	-0.00217343	-0.00246419	-0.00291226		-69.9875	-70.0188	-70.0813	-70.1125	-70.1439	-69.7998	-68.9555	-67.1417	-64.6712	-62.1069	-60.2305	-58.792
7.16	-0.00193654	-0.00193751	-0.00193659	-0.00193829	-0.00194097	-0.00193461	-0.00193337	-0.00195457	-0.00201748	-0.00217802	-0.00247011	-0.0029236		-69.9563	-69.9875	-69.9251	-70.0189	-70.2064	-69.6749	-68.768	-67.173	-64.6087	-62.0131	-60.0743	-58.7608
7.18	-0.00193693	-0.00193925	-0.0019379	-0.00193865	-0.00193944	-0.00193647	-0.00193333	-0.00195481	-0.00201932	-0.00218586	-0.00247864	-0.0029343		-69.925	-70.0501	-69.9563	-69.9876	-70.0501	-69.7374	-68.6741	-67.0479	-64.4836	-62.1069	-60.043	-58.6982
7.2	-0.00193778	-0.00194005	-0.00193919	-0.00193902	-0.00194116	-0.00193513	-0.00193333	-0.00195559	-0.00202222	-0.00219046	-0.00248664	-0.00294656		-69.925	-70.0501	-69.9875	-69.9563	-70.1127	-69.5811	-68.5803	-66.9542	-64.421	-62.0131	-59.9804	-58.6982
7.22	-0.00193955	-0.0019404	-0.00193956	-0.00194077	-0.00194285	-0.00193929	-0.0019361	-0.00195827	-0.00202468	-0.00219674	-0.00249834	-0.00295885		-69.9875	-70.0188	-69.9562	-70.0187	-70.1751	-69.7999	-68.674	-66.9854	-64.3272	-62.0131	-60.1054	-58.6982
7.24	-0.00193992	-0.00194168	-0.00194086	-0.00194114	-0.00194134	-0.00193792	-0.00193564	-0.00195862	-0.00203012	-0.00220197	-0.00250566	-0.0029726		-69.9563	-70.0501	-69.9876	-69.9876	-70.0188	-69.6436	-68.549	-66.8604	-64.4211	-61.9505	-60.0117	-58.7608
7.26	-0.00194122	-0.00194157	-0.00194124	-0.00194197	-0.00194534	-0.00193979	-0.0019366	-0.00196182	-0.00203355	-0.00220727	-0.00251373	-0.00298336		-69.9875	-69.9875	-69.9563	-69.9875	-70.2377	-69.706	-68.5177	-66.9228	-64.3897	-61.8879	-59.949	-58.6981
7.28	-0.00194159	-0.00194331	-0.00194253	-0.00194188	-0.00194334	-0.00194118	-0.00193621	-0.00196265	-0.00203653	-0.00221371	-0.00251826	-0.00299789		-69.9563	-70.0501	-69.9875	-69.925	-70.0501	-69.7374	-68.3927	-66.829	-64.3273	-61.888	-59.699	-58.7921
7.3	-0.00194334	-0.00194366	-0.0019429	-0.00194456	-0.00194324	-0.00194256	-0.0019377	-0.00196727	-0.00204003	-0.00221962	-0.00253231	-0.00300789		-70.0188	-70.0188	-69.9563	-70.05	-69.9875	-69.7686	-68.3926	-66.9853	-64.2959	-61.8567	-59.9178	-58.6982
7.32	-0.00194416	-0.00194402	-0.0019442	-0.00194491	-0.00194543	-0.00194438	-0.00194057	-0.00196761	-0.00204356	-0.00222504	-0.00254117	-0.00302174		-70.0188	-69.9875	-69.9876	-70.0188	-70.0814	-69.8312	-68.4865	-66.8603	-64.2647	-61.7941	-59.8866	-58.7608
7.34	-0.00194497	-0.0019453	-0.0019464	-0.00194663	-0.00194486	-0.00194573	-0.00194156	-0.00196848	-0.00204761	-0.00222785	-0.00255008	-0.00303257		-70.0188	-70.0188	-70.0814	-70.0814	-69.9876	-69.8624	-68.4552	-66.7665	-64.2646	-61.5752	-59.8553	-58.6982
7.36	-0.00194533	-0.00194475	-0.00194536	-0.00194606	-0.00194477	-0.00194523	-0.00194118	-0.00196987	-0.00204725	-0.0022336	-0.00255782	-0.00304058		-69.9875	-69.925	-69.9562	-69.9875	-69.925	-69.7686	-68.3301	-66.7039	-63.9832	-61.5127	-59.7614	-58.5106
7.38	-0.00194707	-0.00194743	-0.00194711	-0.00194871	-0.00194653	-0.0019466	-0.00194316	-0.00197363	-0.00205251	-0.00224157	-0.00256819	-0.00305711		-70.0501	-70.0501	-70.0189	-70.1126	-69.9876	-69.7999	-68.3614	-66.7978	-64.0458	-61.5753	-59.7928	-58.667
7.4	-0.00194696	-0.00194686	-0.00194701	-0.00194721	-0.00194736	-0.00194658	-0.00194421	-0.00197359	-0.00205526	-0.00224841	-0.00257604	-0.00306816		-69.9875	-69.9563	-69.9563	-69.9563	-69.9875	-69.7374	-68.3301	-66.6414	-63.9519	-61.5752	-59.6989	-58.6044
7.42	-0.00194779	-0.00194861	-0.00194922	-0.00194804	-0.00194773	-0.00194796	-0.00194481	-0.00197552	-0.0020581	-0.00225308	-0.00258343	-0.0030801		-69.9875	-70.0188	-70.0501	-69.9562	-69.9562	-69.7686	-68.2675	-66.6101	-63.8581	-61.4501	-59.5739	-58.5731
7.44	-0.00194861	-0.00194942	-0.00194911	-0.00194979	-0.00194994	-0.00194704	-0.00194589	-0.00197747	-0.00206397	-0.00226062	-0.00259602	-0.00309288		-69.9875	-70.0188	-69.9875	-70.0188	-70.05	-69.6436	-68.2362	-66.5788	-63.9519	-61.4814	-59.6989	-58.5731
7.46	-0.00194898	-0.0019507	-0.00195085	-0.00194924	-0.00195028	-0.00194708	-0.0019447	-0.00197661	-0.00206581	-0.00226704	-0.0026028	-0.00310417		-69.9563	-70.0501	-70.0501	-69.925	-70.0189	-69.5811	-68.0487	-66.36	-63.7957	-61.4502	-59.5426	-58.5106
7.48	-0.00195073	-0.00195012	-0.00195165	-0.001951	-0.00194972	-0.00194852	-0.00194589	-0.00198011	-0.00207075	-0.00227679	-0.0026136	-0.00311786		-70.0188	-69.9563	-70.0501	-69.9875	-69.925	-69.6122	-68.0174	-66.4225	-63.8269	-61.6066	-59.5738	-58.5419
7.5	-0.00195109	-0.00195188	-0.00195062	-0.00195136	-0.00195011	-0.00194811	-0.00194664	-0.00198076	-0.00207468	-0.00228363	-0.00262438	-0.00313076		-69.9875	-70.0188	-69.9249	-69.9562	-69.8937	-69.5184	-67.9548	-66.2974	-63.7955	-61.6065	-59.6051	-58.5418
7.52	-0.00195283	-0.00195177	-0.00195421	-0.00195357	-0.00195235	-0.00194912	-0.00194972	-0.00198383	-0.00207814	-0.00229267	-0.00263385	-0.00314445		-70.0501	-69.9563	-70.1126	-70.0501	-69.9876	-69.5184	-68.0487	-66.3287	-63.733	-61.7316	-59.5739	-58.5732
7.54	-0.00195271	-0.00195261	-0.0019527	-0.00195392	-0.00195317	-0.00194921	-0.00194998	-0.00198689	-0.00208065	-0.00230048	-0.00264339	-0.0031558		-69.9875	-69.9563	-69.9562	-70.0188	-69.9875	-69.4559	-67.9548	-66.3599	-63.6079	-61.7942	-59.5425	-58.5105
7.56	-0.00195445	-0.0019539	-0.00195445	-0.0019561	-0.00195399	-0.00194841	-0.00195353	-0.00198756	-0.00208677	-0.00230546	-0.00265748	-0.00316807		-70.0501	-69.9875	-70.0188	-70.1127	-69.9876	-69.3309	-68.08	-66.2349	-63.7018	-61.7003	-59.7302	-58.4793
7.58	-0.00195525	-0.00195427	-0.00195526	-0.00195688	-0.0019539	-0.00195178	-0.0019547	-0.00198878	-0.00209081	-0.0023111	-0.00266614	-0.00318042		-70.0501	-69.9563	-70.0188	-70.1127	-69.925	-69.4872	-68.0486	-66.1411	-63.6705	-61.6378	-59.6677	-58.4481
7.6	-0.00195605	-0.0019551	-0.00195653	-0.00195674	-0.00195475	-0.00195188	-0.00195681	-0.00199053	-0.00209287	-0.00231738	-0.00267686	-0.0031944		-70.0501	-69.9563	-70.0501	-70.0501	-69.925	-69.4246	-68.0799	-66.0785	-63.5142	-61.6066	-59.699	-58.4793
7.62	-0.00195593	-0.00195502	-0.00195596	-0.0019557	-0.00195376	-0.00195338	-0.00195659	-0.00199043	-0.00209658	-0.00232035	-0.0026843	-0.00320834		-69.9875	-69.8937	-69.9563	-69.925	-69.7999	-69.4558	-67.9548	-65.8908	-63.4516	-61.3876	-59.5738	-58.5105
7.64	-0.00195675	-0.00195771	-0.00195587	-0.00195746	-0.00195465	-0.00195257	-0.00195736	-0.00199281	-0.00209984	-0.00232526	-0.00269585	-0.00322224		-69.9875	-70.0188	-69.8937	-69.9875	-69.7999	-69.3308	-67.8922	-65.8595	-63.3578	-61.2625	-59.6363	-58.5418
7.66	-0.00195803	-0.00195852	-0.00195811	-0.00195828	-0.00195692	-0.00195641	-0.00196048	-0.00199569	-0.00210519	-0.00233369	-0.00270406	-0.00323218		-70.0188	-70.0188	-69.9875	-69.9875	-69.8937	-69.5184	-67.9861	-65.8596	-63.389	-61.325	-59.5426	-58.4168
7.68	-0.00195793	-0.00195887	-0.00195709	-0.00195819	-0.00195824	-0.00195512	-0.00195984	-0.00199762	-0.00210649	-0.00233924	-0.00271178	-0.00324555		-69.9563	-69.9875	-69.8625	-69.925	-69.925	-69.3621	-67.8298	-65.7971	-63.1702	-61.2313	-59.4175	-58.4168
7.7	-0.00195968	-0.00195969	-0.00195934	-0.00195995	-0.00195954	-0.00195618	-0.00196252	-0.00200149	-0.00211254	-0.00234604	-0.002723	-0.00325814		-70.0188	-69.9875	-69.9563	-69.9875	-69.9563	-69.3621	-67.8923	-65.8596	-63.2327	-61.2	-59.4488	-58.3855
7.72	-0.00196048	-0.00196097	-0.00196155	-0.00195985	-0.00195945	-0.00195679	-0.00196378	-0.00200294	-0.00211701	-0.00235232	-0.00273287	-0.00327321		-70.0188	-70.0188	-70.0501	-69.925	-69.8937	-69.3308	-67.861	-65.7658	-63.2015	-61.1375	-59.4174	-58.4481
7.74	-0.00196129	-0.00196178	-0.00196142	-0.00196207	-0.00196031	-0.00195833	-0.00196599	-0.00200732	-0.002121	-0.00235755	-0.00274148	-0.00328737		-70.0188	-70.0188	-69.9875	-70.0188	-69.8937	-69.3621	-67.8923	-65.8595	-63.1389	-61.0124	-59.3236	-58.4793
7.76	-0.00196118	-0.00196258	-0.0019604	-0.00196242	-0.00195933	-0.00195571	-0.00196632	-0.00200781	-0.00212404	-0.00236351	-0.00274893	-0.00329829		-69.9563	-70.0188	-69.8625	-69.9875	-69.7687	-69.1119	-67.7985	-65.7033	-63.0138	-60.9185	-59.1673	-58.3855
7.78	-0.00196293	-0.00196293	-0.00196357	-0.0019637	-0.00196253	-0.00195872	-0.00196948	-0.00201079	-0.00213025	-0.00237017	-0.00276	-0.00331425		-70.0188	-69.9875	-70.0188	-70.0188	-69.925	-69.237	-67.8923	-65.7032	-63.0763	-60.856	-59.1673	-58.4793
7.8	-0.00196328	-0.00196375	-0.001963	-0.00196358	-0.00196337	-0.0019603	-0.00196934	-0.00201186	-0.0021359	-0.00237634	-0.00277041	-0.00332599		-69.9875	-69.9875	-69.9249	-69.9562	-69.9249	-69.2683	-67.7672	-65.5781	-63.1076	-60.7622	-59.136	-58.4167
7.82	-0.00196364	-0.00196411	-0.00196292	-0.00196396	-0.00196329	-0.00196094	-0.00197113	-0.00201397	-0.00213897	-0.00238264	-0.00277754	-0.0033379		-69.9563	-69.9563	-69.8625	-69.9251	-69.8625	-69.237	-67.7672	-65.5157	-62.9826	-60.6684	-58.9484	-58.3543
7.84	-0.00196631	-0.00196586	-0.00196655	-0.0019671	-0.00196692	-0.0019639	-0.00197384	-0.00201803	-0.00214317	-0.00239195	-0.00279309	-0.0033532		-70.0813	-70.0188	-70.05	-70.0813	-70.05	-69.362	-67.8297	-65.578	-62.9199	-60.7308	-59.1359	-58.4167
7.86	-0.00196571	-0.00196667	-0.00196596	-0.00196604	-0.00196587	-0.00196173	-0.00197326	-0.00201629	-0.00214692	-0.00239773	-0.00280023	-0.00336595		-69.9875	-70.0188	-69.9562	-69.9562	-69.9249	-69.1431	-67.6734	-65.2654	-62.8261	-60.6058	-58.9484	-58.3855
7.88	-0.0019656	-0.00196655	-0.00196448	-0.00196548	-0.00196533	-0.0019615	-0.00197276	-0.00201669	-0.00215026	-0.00240425	-0.00281178	-0.00337879		-69.925	-69.9563	-69.7999	-69.8624	-69.8312	-69.0494	-67.5171	-65.0778	-62.7011	-60.5121	-58.9484	-58.3543
7.9	-0.00196691	-0.00196784	-0.00196814	-0.00196727	-0.00196713	-0.00196454	-0.00197467	-0.00202011	-0.00215629	-0.00241034	-0.00282198	-0.00339337		-69.9563	-69.9875	-69.9876	-69.925	-69.8937	-69.1744	-67.5171	-65.0778	-62.7324	-60.387	-58.8859	-58.3856
7.92	-0.0019682	-0.00196912	-0.00196803	-0.00196765	-0.00196798	-0.00196429	-0.00197658	-0.00202305	-0.00216075	-0.00242067	-0.00283369	-0.00340541		-69.9875	-70.0188	-69.925	-69.8937	-69.8937	-69.0806	-67.5169	-65.0464	-62.6698	-60.4807	-58.8858	-58.3229
7.94	-0.00196947	-0.00196946	-0.00197118	-0.00197081	-0.00196837	-0.00196547	-0.00197896	-0.00202939	-0.00216371	-0.00242914	-0.00284335	-0.00341844		-70.0188	-69.9875	-70.0814	-70.05	-69.8624	-69.0806	-67.5482	-65.2341	-62.5134	-60.4808	-58.792	-58.2916
7.96	-0.00197028	-0.00197074	-0.00197104	-0.00196975	-0.00196831	-0.00196711	-0.00198039	-0.00203125	-0.0021684	-0.0024388	-0.00285596	-0.00343323		-70.0188	-70.0188	-70.0188	-69.925	-69.7999	-69.1119	-67.517	-65.1403	-62.4509	-60.5432	-58.8233	-58.3229
7.98	-0.00197016	-0.00197108	-0.00197092	-0.00196921	-0.00196735	-0.00196689	-0.00197996	-0.00203268	-0.00217315	-0.00244485	-0.00286646	-0.00344798		-69.9563	-69.9875	-69.9563	-69.8312	-69.6748	-69.0182	-67.3607	-65.0152	-62.3884	-60.4182	-58.7608	-58.3543
8	-0.00197145	-0.00197189	-0.00197359	-0.00197193	-0.00197014	-0.0019667	-0.00198195	-0.00203518	-0.0021811	-0.0024564	-0.00288057	-0.00346268		-69.9875	-69.9875	-70.0813	-69.9562	-69.7999	-68.9242	-67.3606	-64.9527	-62.5134	-60.5745	-58.8546	-58.3855
8.02	-0.0019718	-0.00197317	-0.00197391	-0.00197322	-0.00197056	-0.00196795	-0.00198395	-0.0020387	-0.00218369	-0.00246241	-0.00289034	-0.00347566		-69.9563	-70.0188	-70.0501	-69.9876	-69.7687	-68.9243	-67.3607	-64.9527	-62.3258	-60.4495	-58.7608	-58.3543
8.04	-0.00197309	-0.00197351	-0.00197331	-0.00197357	-0.00197053	-0.00197058	-0.00198641	-0.00204026	-0.00219068	-0.00247098	-0.00290451	-0.00348956		-69.9875	-69.9875	-69.9562	-69.9562	-69.7061	-69.0181	-67.3919	-64.8276	-62.3883	-60.4495	-58.8545	-58.3542
8.06	-0.0019739	-0.00197386	-0.00197321	-0.00197486	-0.00197331	-0.00197179	-0.00198792	-0.00204485	-0.00219497	-0.00247897	-0.00291572	-0.00350434		-69.9875	-69.9563	-69.8937	-69.9875	-69.8311	-69.018	-67.3606	-64.8901	-62.2945	-60.4181	-58.8233	-58.3855
8.08	-0.00197518	-0.00197515	-0.00197638	-0.00197706	-0.00197418	-0.0019716	-0.00199038	-0.00204841	-0.00220043	-0.00248641	-0.00292983	-0.00351566		-70.0188	-69.9875	-70.0501	-70.0814	-69.8312	-68.9242	-67.392	-64.8902	-62.2633	-60.3556	-58.9171	-58.2917
8.1	-0.00197598	-0.0019755	-0.00197624	-0.00197923	-0.00197366	-0.00197377	-0.00198953	-0.00205002	-0.00220591	-0.00249395	-0.00293881	-0.00353149		-70.0188	-69.9563	-69.9876	-70.1751	-69.7374	-68.9868	-67.2043	-64.7651	-62.232	-60.2931	-58.792	-58.3542
8.12	-0.00197632	-0.00197725	-0.00197798	-0.00197904	-0.00197457	-0.00197313	-0.00199255	-0.0020527	-0.00220826	-0.00250279	-0.0029509	-0.00354462		-69.9875	-70.0188	-70.0501	-70.1126	-69.7374	-68.8617	-67.2668	-64.7025	-62.013	-60.293	-58.792	-58.3229
8.14	-0.0019762	-0.00197805	-0.00197876	-0.00197935	-0.00197548	-0.00197486	-0.00199176	-0.00205493	-0.00221509	-0.00250922	-0.00296158	-0.00355525		-69.925	-70.0188	-70.05	-70.0814	-69.7373	-68.893	-67.0792	-64.6087	-62.0444	-60.168	-58.7295	-58.1979
8.16	-0.00197797	-0.00197792	-0.00197955	-0.00198244	-0.00197593	-0.00197472	-0.0019958	-0.0020592	-0.00222136	-0.00251706	-0.00297527	-0.00357138		-69.9875	-69.9563	-70.0501	-70.2376	-69.7061	-68.7992	-67.2042	-64.6399	-62.0443	-60.1055	-58.792	-58.2603
8.18	-0.00197878	-0.00197967	-0.00198034	-0.0019813	-0.00197824	-0.00197509	-0.00199645	-0.00206148	-0.00222978	-0.00252621	-0.0029867	-0.00358479		-69.9875	-70.0188	-70.0501	-70.1126	-69.7999	-68.7366	-67.1104	-64.5461	-62.1694	-60.1055	-58.7607	-58.2291
8.2	-0.00197913	-0.00198047	-0.0019802	-0.00198253	-0.00197634	-0.00197455	-0.00199669	-0.00206384	-0.00223378	-0.00253355	-0.0029982	-0.00359654		-69.9563	-70.0188	-69.9876	-70.144	-69.6124	-68.6116	-66.9855	-64.4523	-62.0444	-60.0117	-58.7295	-58.1354
8.22	-0.00198134	-0.00198127	-0.0019824	-0.00198467	-0.00198101	-0.00197779	-0.00199984	-0.00206675	-0.0022406	-0.00254594	-0.00301125	-0.00361555		-70.0501	-70.0188	-70.0813	-70.2377	-69.8625	-68.7366	-67.048	-64.3898	-62.0757	-60.168	-58.7608	-58.2917
8.24	-0.0019812	-0.00198207	-0.00198225	-0.0019826	-0.00197908	-0.00197679	-0.00199963	-0.0020717	-0.00224524	-0.00255258	-0.00302425	-0.00362806		-69.9875	-70.0188	-70.0188	-70.05	-69.6748	-68.5802	-66.8916	-64.4523	-61.9817	-60.0429	-58.792	-58.2291
8.26	-0.00198201	-0.00198194	-0.00198258	-0.00198618	-0.00198047	-0.00197725	-0.00200235	-0.00207462	-0.00224999	-0.00256002	-0.00303428	-0.00364338		-69.9875	-69.9563	-69.9875	-70.2377	-69.706	-68.5177	-66.9228	-64.3897	-61.8879	-59.949	-58.6981	-58.2603
8.28	-0.00198235	-0.00198322	-0.00198246	-0.0019841	-0.00198186	-0.00197681	-0.00200316	-0.00207759	-0.00225647	-0.00256453	-0.00304893	-0.00365422		-69.9563	-69.9875	-69.925	-70.0501	-69.7374	-68.3927	-66.829	-64.3273	-61.888	-59.699	-58.7921	-58.1354
8.3	-0.00198411	-0.00198357	-0.00198515	-0.00198396	-0.00198323	-0.00197828	-0.00200782	-0.0020811	-0.00226242	-0.00257874	-0.00305898	-0.00367071		-70.0188	-69.9563	-70.05	-69.9875	-69.7686	-68.3926	-66.9853	-64.2959	-61.8567	-59.9178	-58.6982	-58.1978
8.32	-0.00198444	-0.00198439	-0.00198501	-0.0019857	-0.00198459	-0.0019807	-0.00200764	-0.00208414	-0.00226731	-0.00258703	-0.0030722	-0.0036844		-69.9875	-69.9563	-69.9875	-70.0501	-69.7999	-68.4552	-66.829	-64.2334	-61.7628	-59.8553	-58.7295	-58.1666
8.34	-0.00198525	-0.00198661	-0.00198675	-0.00198509	-0.00198593	-0.00198168	-0.0020085	-0.00208823	-0.00227013	-0.00259605	-0.00308315	-0.00369818		-69.9875	-70.0501	-70.0501	-69.9563	-69.8311	-68.4239	-66.7352	-64.2333	-61.5439	-59.824	-58.6669	-58.1353
8.36	-0.00198699	-0.00198693	-0.00198753	-0.00198637	-0.0019868	-0.00198268	-0.00201131	-0.00208932	-0.00227758	-0.00260576	-0.00309348	-0.00371568		-70.0501	-70.0188	-70.0501	-69.9876	-69.8312	-68.3927	-66.7665	-64.0458	-61.5753	-59.824	-58.5732	-58.2291
8.38	-0.00198684	-0.00198679	-0.00198832	-0.00198625	-0.00198627	-0.00198275	-0.00201316	-0.00209257	-0.00228335	-0.00261359	-0.00310703	-0.00372571		-69.9875	-69.9563	-70.05	-69.925	-69.7373	-68.2988	-66.7352	-63.9832	-61.5127	-59.7302	-58.6044	-58.0727
8.4	-0.00198764	-0.00198761	-0.0019877	-0.00198801	-0.00198717	-0.00198475	-0.00201406	-0.00209637	-0.00229141	-0.00262285	-0.00311978	-0.00373887		-69.9875	-69.9563	-69.9563	-69.9875	-69.7374	-68.3301	-66.6414	-63.9519	-61.5752	-59.6989	-58.6044	-58.0102
8.42	-0.00198845	-0.00198983	-0.00198852	-0.00198835	-0.00198854	-0.00198531	-0.00201598	-0.00209919	-0.00229609	-0.00263026	-0.0031318	-0.0037522		-69.9875	-70.0501	-69.9562	-69.9562	-69.7686	-68.2675	-66.6101	-63.8581	-61.4501	-59.5739	-58.5731	-57.9476
8.44	-0.00198926	-0.00198968	-0.00199027	-0.00199057	-0.00198757	-0.00198638	-0.00201791	-0.00210511	-0.00230369	-0.00264298	-0.00314466	-0.00377304		-69.9875	-69.9875	-70.0188	-70.05	-69.6436	-68.2362	-66.5788	-63.9519	-61.4814	-59.6989	-58.5731	-58.1353
8.46	-0.00198913	-0.00199095	-0.0019892	-0.00199042	-0.00198711	-0.00198465	-0.00201651	-0.00210642	-0.00230959	-0.00264912	-0.00315525	-0.0037861		-69.925	-70.0188	-69.8937	-69.9876	-69.5498	-68.0174	-66.3287	-63.7644	-61.4189	-59.5113	-58.4793	-58.0728
8.48	-0.0019909	-0.00199174	-0.00199097	-0.00198982	-0.00198855	-0.00198584	-0.00202005	-0.00211142	-0.00231948	-0.00266007	-0.00316911	-0.00380302		-69.9875	-70.0188	-69.9562	-69.8937	-69.5809	-67.9861	-66.3912	-63.7956	-61.5753	-59.5425	-58.5106	-58.1352
8.5	-0.00199264	-0.00199207	-0.00199273	-0.0019916	-0.00198951	-0.00198798	-0.00202212	-0.00211691	-0.00232808	-0.00267292	-0.00318448	-0.00381704		-70.0501	-69.9875	-70.0188	-69.9563	-69.581	-68.0174	-66.36	-63.8581	-61.6691	-59.6677	-58.6044	-58.1041
8.52	-0.00199202	-0.00199334	-0.00199259	-0.00199148	-0.00198814	-0.0019887	-0.00202276	-0.00211778	-0.00233433	-0.00267912	-0.00319427	-0.00383115		-69.9563	-70.0188	-69.9563	-69.8938	-69.4246	-67.9549	-66.2349	-63.6392	-61.6378	-59.4801	-58.4794	-58.0728
8.54	-0.00199377	-0.00199367	-0.0019948	-0.00199419	-0.0019901	-0.00199086	-0.00202781	-0.00212239	-0.00234457	-0.00269147	-0.00320898	-0.00384441		-70.0188	-69.9875	-70.0501	-70.0188	-69.4872	-67.9861	-66.3912	-63.6392	-61.8255	-59.5738	-58.5418	-58.0102
8.56	-0.00199503	-0.00199494	-0.00199652	-0.00199452	-0.00198877	-0.00199394	-0.00202795	-0.00212803	-0.00234895	-0.002705	-0.00322048	-0.00386256		-70.0501	-70.0188	-70.1127	-69.9876	-69.3309	-68.08	-66.2349	-63.7018	-61.7003	-59.7302	-58.4793	-58.1041
8.58	-0.00199581	-0.00199573	-0.00199728	-0.00199438	-0.00199217	-0.00199509	-0.00202914	-0.00213208	-0.00235462	-0.00271371	-0.0032329	-0.00387673		-70.0501	-70.0188	-70.1127	-69.925	-69.4872	-68.0486	-66.1411	-63.6705	-61.6378	-59.6677	-58.4481	-58.0728
8.6	-0.00199612	-0.00199652	-0.00199663	-0.00199474	-0.00199176	-0.00199673	-0.00203039	-0.0021336	-0.00236036	-0.00272385	-0.0032462	-0.00389384		-70.0188	-70.0188	-70.0188	-69.8937	-69.3933	-68.0486	-66.0472	-63.4829	-61.5753	-59.6677	-58.448	-58.1353
8.62	-0.00199644	-0.00199638	-0.00199601	-0.00199418	-0.00199374	-0.00199696	-0.00203074	-0.00213785	-0.0023639	-0.00273203	-0.0032611	-0.00390701		-69.9875	-69.9563	-69.925	-69.7999	-69.4558	-67.9548	-65.8908	-63.4516	-61.3876	-59.5738	-58.5105	-58.0727
8.64	-0.00199771	-0.00199672	-0.00199825	-0.00199552	-0.00199335	-0.00199817	-0.0020336	-0.00214162	-0.00236939	-0.00274434	-0.0032759	-0.00392802		-70.0188	-69.925	-70.0188	-69.8312	-69.3621	-67.9235	-65.8908	-63.3891	-61.2938	-59.6676	-58.5731	-58.2604
8.66	-0.00199897	-0.00199895	-0.00199904	-0.00199779	-0.00199721	-0.00200129	-0.00203646	-0.00214699	-0.00237785	-0.00275254	-0.00328581	-0.0039438		-70.0501	-70.0188	-70.0188	-69.925	-69.5497	-68.0174	-65.8909	-63.4203	-61.3563	-59.5739	-58.4481	-58.2917
8.68	-0.00199975	-0.00199881	-0.00199983	-0.00200002	-0.00199678	-0.00200153	-0.00203933	-0.00214924	-0.00238453	-0.00276156	-0.0033008	-0.00395856		-70.0501	-69.9563	-70.0188	-70.0188	-69.4559	-67.9236	-65.8909	-63.264	-61.3251	-59.5113	-58.5106	-58.2917
8.7	-0.00200006	-0.00199962	-0.00200015	-0.00199988	-0.00199638	-0.00200275	-0.0020417	-0.0021537	-0.00238952	-0.0027707	-0.00331086	-0.00396849		-70.0188	-69.9563	-69.9875	-69.9563	-69.3621	-67.8923	-65.8596	-63.2327	-61.2	-59.4488	-58.3855	-58.1353
8.72	-0.00200038	-0.00200137	-0.00199954	-0.00199928	-0.00199649	-0.00200352	-0.00204264	-0.00215767	-0.00239526	-0.00277996	-0.00332523	-0.00398466		-69.9875	-70.0188	-69.8937	-69.8624	-69.2995	-67.8297	-65.7345	-63.1702	-61.1062	-59.3861	-58.4168	-58.1666
8.74	-0.00200212	-0.00200216	-0.00200272	-0.00200107	-0.00199897	-0.00200669	-0.00204805	-0.00216274	-0.00240169	-0.00279001	-0.00334118	-0.00400272		-70.0501	-70.0188	-70.0501	-69.925	-69.3934	-67.9236	-65.8908	-63.1702	-61.0437	-59.3549	-58.5106	-58.2605
8.76	-0.0020029	-0.00200201	-0.00200397	-0.00200096	-0.00199719	-0.00200791	-0.00204945	-0.00216677	-0.00240879	-0.00279878	-0.00335371	-0.00401764		-70.0501	-69.9563	-70.0813	-69.8625	-69.2057	-67.8923	-65.7971	-63.1076	-61.0123	-59.2611	-58.4793	-58.2604
8.78	-0.0020032	-0.00200376	-0.00200379	-0.00200274	-0.00199877	-0.00200963	-0.00205091	-0.00217138	-0.00241361	-0.00280772	-0.00336714	-0.00402963		-70.0188	-70.0188	-70.0188	-69.925	-69.237	-67.8923	-65.7032	-63.0763	-60.856	-59.1673	-58.4793	-58.1666
8.8	-0.00200446	-0.00200408	-0.00200458	-0.00200451	-0.00200129	-0.00201039	-0.00205292	-0.00217812	-0.00242097	-0.00281956	-0.00338059	-0.00404384		-70.0501	-69.9875	-70.0188	-69.9875	-69.3309	-67.8298	-65.6407	-63.1702	-60.8248	-59.1986	-58.4793	-58.1353
8.82	-0.0020057	-0.00200488	-0.00200584	-0.0020053	-0.00200281	-0.00201309	-0.00205595	-0.00218215	-0.00242838	-0.00282795	-0.00339406	-0.00405815		-70.0813	-69.9875	-70.0501	-69.9875	-69.362	-67.8922	-65.6407	-63.1076	-60.7934	-59.0734	-58.4793	-58.104
8.84	-0.002006	-0.00200615	-0.00200661	-0.00200657	-0.00200339	-0.00201337	-0.00205751	-0.00218362	-0.00243467	-0.00284	-0.00340507	-0.00407355		-70.0501	-70.0188	-70.0501	-70.0188	-69.3308	-67.7985	-65.5468	-62.8887	-60.6996	-59.1047	-58.3855	-58.1041
8.86	-0.00200677	-0.00200693	-0.00200692	-0.00200689	-0.00200257	-0.00201418	-0.00205717	-0.00218898	-0.00244226	-0.00284927	-0.00342045	-0.00408698		-70.0501	-70.0188	-70.0188	-69.9875	-69.2057	-67.736	-65.328	-62.8887	-60.6684	-59.011	-58.4481	-58.0415
8.88	-0.00200755	-0.00200631	-0.00200723	-0.00200722	-0.00200321	-0.00201454	-0.00205846	-0.0021933	-0.00244991	-0.00286217	-0.00343489	-0.0041066		-70.0501	-69.925	-69.9875	-69.9563	-69.1745	-67.6422	-65.2029	-62.8262	-60.6372	-59.0735	-58.4794	-58.1666
8.9	-0.00200738	-0.00200854	-0.00200756	-0.00200755	-0.0020048	-0.00201495	-0.00206032	-0.00219767	-0.00245406	-0.00287012	-0.00344678	-0.00412089		-69.9875	-70.0188	-69.9562	-69.9249	-69.2056	-67.5483	-65.109	-62.7636	-60.4182	-58.9171	-58.4168	-58.1353
8.92	-0.00200865	-0.00200839	-0.0020079	-0.00200838	-0.0020045	-0.00201684	-0.00206324	-0.00220211	-0.00246444	-0.00288185	-0.00345881	-0.00414035		-70.0188	-69.9563	-69.925	-69.925	-69.1119	-67.5482	-65.0777	-62.7011	-60.512	-58.9171	-58.3542	-58.2604
8.94	-0.00200896	-0.00201061	-0.00201013	-0.00200778	-0.0020047	-0.00201825	-0.00206864	-0.00220396	-0.00247174	-0.0028901	-0.00347016	-0.00415241		-69.9875	-70.0501	-70.0187	-69.8311	-69.0493	-67.5169	-65.2028	-62.4821	-60.4495	-58.7607	-58.2603	-58.1665
8.96	-0.0020107	-0.00201138	-0.00200998	-0.00200864	-0.0020073	-0.00202064	-0.00207149	-0.00220975	-0.00248271	-0.00290427	-0.00348681	-0.00416982		-70.0501	-70.0501	-69.9563	-69.8312	-69.1432	-67.5483	-65.1716	-62.4822	-60.5745	-58.8546	-58.3542	-58.2291
8.98	-0.002011	-0.00201168	-0.00200984	-0.00200808	-0.00200749	-0.00202061	-0.00207337	-0.00221501	-0.00248933	-0.00291547	-0.00350244	-0.00418198		-70.0188	-70.0188	-69.8937	-69.7373	-69.0807	-67.4232	-65.0777	-62.4509	-60.4807	-58.8233	-58.4168	-58.1353
9	-0.00201085	-0.00201294	-0.00201115	-0.00200945	-0.00200582	-0.00202113	-0.00207432	-0.00222138	-0.0024991	-0.00292746	-0.00351454	-0.00420261		-69.9563	-70.0501	-69.925	-69.7687	-68.893	-67.3294	-64.9215	-62.4822	-60.5433	-58.8234	-58.3543	-58.2917
9.02	-0.00201165	-0.00201371	-0.00201291	-0.00201033	-0.00200754	-0.00202361	-0.00207837	-0.00222451	-0.00250577	-0.00293805	-0.00352851	-0.0042136		-69.9563	-70.0501	-69.9876	-69.7687	-68.9243	-67.3607	-64.9527	-62.3258	-60.4495	-58.7608	-58.3543	-58.1667
9.04	-0.0020134	-0.00201354	-0.0020137	-0.00201074	-0.00201066	-0.00202656	-0.00208041	-0.00223209	-0.00251501	-0.00295305	-0.00354336	-0.00422595		-70.0188	-69.9875	-69.9875	-69.7374	-69.0494	-67.4232	-64.8589	-62.4196	-60.4808	-58.8858	-58.3855	-58.0728
9.06	-0.00201466	-0.00201386	-0.00201544	-0.00201399	-0.00201231	-0.00202852	-0.0020855	-0.0022369	-0.0025236	-0.00296498	-0.00355903	-0.00424789		-70.0501	-69.9563	-70.0501	-69.8937	-69.0806	-67.4232	-64.9527	-62.3571	-60.4807	-58.8859	-58.4481	-58.2604
9.08	-0.00201448	-0.00201561	-0.00201621	-0.00201341	-0.00201063	-0.00202951	-0.00208753	-0.00224069	-0.00252916	-0.00297693	-0.00356764	-0.00426106		-69.9875	-70.0188	-70.0501	-69.7999	-68.8929	-67.3607	-64.8589	-62.232	-60.3243	-58.8858	-58.2604	-58.1978
9.1	-0.00201528	-0.00201545	-0.0020184	-0.00201286	-0.00201282	-0.00202861	-0.00208913	-0.00224624	-0.00253678	-0.00298601	-0.00358366	-0.0042744		-69.9875	-69.9563	-70.1438	-69.7061	-68.9555	-67.173	-64.7338	-62.2007	-60.2618	-58.7607	-58.3229	-58.1353
9.12	-0.00201607	-0.00201767	-0.00201866	-0.00201423	-0.00201261	-0.00203214	-0.00209233	-0.00224912	-0.00254634	-0.00299896	-0.00359781	-0.00429212		-69.9875	-70.0501	-70.1126	-69.7374	-68.8617	-67.2668	-64.7025	-62.013	-60.293	-58.792	-58.3229	-58.1979
9.14	-0.00201639	-0.00201891	-0.00201941	-0.0020156	-0.00201482	-0.00203177	-0.00209505	-0.00225655	-0.00255341	-0.00301043	-0.00360935	-0.00430443		-69.9563	-70.0813	-70.1127	-69.7686	-68.9243	-67.1105	-64.64	-62.0757	-60.1993	-58.7608	-58.2292	-58.1041
9.16	-0.00201767	-0.0020192	-0.00202204	-0.00201553	-0.00201415	-0.00203534	-0.00209882	-0.00226228	-0.00256062	-0.00302343	-0.00362463	-0.00432334		-69.9875	-70.0501	-70.2376	-69.7061	-68.7992	-67.2042	-64.6399	-62.0443	-60.1055	-58.792	-58.2603	-58.1978
9.18	-0.00201846	-0.00201996	-0.00202085	-0.00201785	-0.00201448	-0.00203597	-0.00210108	-0.00227077	-0.00256984	-0.00303492	-0.00363811	-0.00433461		-69.9875	-70.0501	-70.1126	-69.7999	-68.7366	-67.1104	-64.5461	-62.1694	-60.1055	-58.7607	-58.2291	-58.0728
9.2	-0.00201926	-0.00202026	-0.00202254	-0.00201635	-0.00201437	-0.00203664	-0.00210392	-0.00227532	-0.00257783	-0.00304724	-0.0036508	-0.00434835		-69.9875	-70.0188	-70.1752	-69.6436	-68.6428	-67.0167	-64.4835	-62.0756	-60.0429	-58.7607	-58.1666	-58.0102
9.22	-0.00201958	-0.00202056	-0.00202279	-0.00201917	-0.00201572	-0.00203785	-0.0021048	-0.00227997	-0.00258779	-0.00305735	-0.00366632	-0.00436654		-69.9563	-69.9875	-70.1439	-69.7687	-68.6428	-66.9542	-64.296	-61.9819	-60.0742	-58.667	-58.1979	-58.0728
9.24	-0.00202133	-0.0020223	-0.00202257	-0.0020191	-0.0020166	-0.00203958	-0.00211187	-0.00228692	-0.00259709	-0.00307361	-0.00368269	-0.00438245		-70.0188	-70.0501	-70.0813	-69.7061	-68.6115	-66.9229	-64.4836	-62.013	-60.0742	-58.8233	-58.2604	-58.0728
9.26	-0.00202258	-0.00202307	-0.00202665	-0.00202095	-0.00201749	-0.00204278	-0.00211527	-0.00229219	-0.00260515	-0.00308437	-0.00369894	-0.00440054		-70.0501	-70.0501	-70.3003	-69.7686	-68.5803	-66.9854	-64.4523	-61.9505	-60.0116	-58.7607	-58.3229	-58.1354
9.28	-0.00202287	-0.00202289	-0.00202447	-0.0020223	-0.00201697	-0.00204352	-0.00211818	-0.00229864	-0.00260954	-0.00309902	-0.00370965	-0.00441307		-70.0188	-69.9875	-70.1126	-69.7999	-68.4552	-66.8915	-64.3898	-61.9505	-59.7615	-58.8546	-58.1979	-58.0415
9.3	-0.0020227	-0.00202368	-0.00202237	-0.00202174	-0.0020165	-0.00204625	-0.00211962	-0.00230233	-0.00262127	-0.00310597	-0.00372248	-0.00443021		-69.9563	-69.9875	-69.925	-69.7061	-68.3301	-66.9228	-64.2334	-61.7942	-59.8553	-58.6357	-58.1353	-58.0728
9.32	-0.0020235	-0.00202399	-0.00202461	-0.00202359	-0.00201943	-0.00204654	-0.00212322	-0.00230786	-0.00263033	-0.00312017	-0.0037373	-0.00444294		-69.9563	-69.9563	-70.0189	-69.7687	-68.424	-66.7978	-64.2022	-61.7316	-59.8241	-58.6983	-58.1354	-57.979
9.34	-0.00202478	-0.00202622	-0.00202443	-0.00202541	-0.00202088	-0.00204787	-0.00212786	-0.00231124	-0.00264009	-0.00313199	-0.00375214	-0.00446139		-69.9875	-70.0501	-69.9563	-69.8311	-68.4239	-66.7352	-64.2333	-61.5439	-59.824	-58.6669	-58.1353	-58.0415
9.36	-0.00202605	-0.00202651	-0.00202523	-0.00202578	-0.00202138	-0.00205021	-0.0021284	-0.00231819	-0.00264922	-0.00314161	-0.00376884	-0.00447642		-70.0188	-70.0188	-69.9563	-69.7999	-68.3614	-66.7352	-64.0145	-61.544	-59.7927	-58.5419	-58.1978	-58.0102
9.38	-0.00202682	-0.00202824	-0.00202603	-0.00202617	-0.00202239	-0.00205303	-0.00213269	-0.00232514	-0.00265842	-0.00315685	-0.00378081	-0.00449705		-70.0188	-70.0813	-69.9563	-69.7686	-68.3301	-66.7665	-64.0145	-61.544	-59.7615	-58.6357	-58.104	-58.1353
9.4	-0.00202712	-0.00202709	-0.00202731	-0.00202657	-0.00202388	-0.0020534	-0.00213596	-0.00233267	-0.00266704	-0.00316885	-0.00379303	-0.00451737		-69.9875	-69.9563	-69.9875	-69.7374	-68.3301	-66.6414	-63.9519	-61.5752	-59.6989	-58.6044	-58.0102	-58.2604
9.42	-0.00202839	-0.00202836	-0.0020281	-0.0020284	-0.0020249	-0.00205579	-0.00213929	-0.00233791	-0.00267512	-0.00318171	-0.00380734	-0.00452852		-70.0188	-69.9875	-69.9875	-69.7999	-68.2988	-66.6414	-63.8894	-61.4814	-59.6052	-58.6044	-57.9789	-58.1353
9.44	-0.00202916	-0.0020301	-0.00203031	-0.00202736	-0.00202593	-0.0020577	-0.00214523	-0.00234553	-0.0026879	-0.00319459	-0.00382828	-0.0045478		-70.0188	-70.0501	-70.0813	-69.6749	-68.2675	-66.6101	-63.9832	-61.5127	-59.7302	-58.6044	-58.1666	-58.2291
9.46	-0.00202899	-0.00202896	-0.00203011	-0.00202684	-0.00202411	-0.0020562	-0.00214648	-0.00235142	-0.002694	-0.00320515	-0.00384131	-0.00456127		-69.9563	-69.925	-70.0189	-69.5811	-68.0487	-66.36	-63.7957	-61.4502	-59.5426	-58.5106	-58.1041	-58.1666
9.48	-0.00203121	-0.0020312	-0.00202994	-0.00202874	-0.00202574	-0.00206023	-0.002152	-0.00236193	-0.00270562	-0.00321983	-0.00385921	-0.0045839		-70.0501	-70.0188	-69.9563	-69.6435	-68.0487	-66.4538	-63.8582	-61.6379	-59.6051	-58.5732	-58.1978	-58.3543
9.5	-0.0020315	-0.0020315	-0.00203026	-0.00202823	-0.00202642	-0.00206078	-0.00215592	-0.00236881	-0.00271652	-0.00323284	-0.00387031	-0.00460043		-70.0188	-69.9875	-69.925	-69.5497	-67.9861	-66.3287	-63.8268	-61.6378	-59.6364	-58.5731	-58.0728	-58.3855
9.52	-0.0020318	-0.00203228	-0.00203107	-0.00202776	-0.00202808	-0.00206238	-0.0021578	-0.00237628	-0.00272408	-0.00324429	-0.00388646	-0.00461124		-69.9875	-69.9875	-69.925	-69.4558	-67.9861	-66.2661	-63.6704	-61.669	-59.5113	-58.5106	-58.104	-58.2604
9.54	-0.00203258	-0.00203355	-0.00203283	-0.00202876	-0.00202926	-0.00206648	-0.00216137	-0.00238544	-0.00273516	-0.00325747	-0.0038978	-0.0046258		-69.9875	-70.0188	-69.9875	-69.4559	-67.9548	-66.3599	-63.6079	-61.7942	-59.5425	-58.5105	-57.9789	-58.2291
9.56	-0.00203337	-0.0020348	-0.00203266	-0.0020269	-0.0020319	-0.0020661	-0.00216655	-0.00238928	-0.0027482	-0.0032683	-0.0039152	-0.00464615		-69.9875	-70.0501	-69.925	-69.2683	-68.0174	-66.1723	-63.6392	-61.6377	-59.6676	-58.4167	-58.0415	-58.3542
9.58	-0.00203415	-0.00203556	-0.00203252	-0.00203036	-0.00203307	-0.0020673	-0.00217067	-0.00239504	-0.00275706	-0.00328093	-0.00392959	-0.00465819		-69.9875	-70.0501	-69.8624	-69.4246	-67.986	-66.0785	-63.6079	-61.5752	-59.6051	-58.3855	-58.0102	-58.2604
9.6	-0.00203494	-0.00203536	-0.00203335	-0.00203041	-0.00203521	-0.00206906	-0.00217274	-0.00240146	-0.00276805	-0.00329524	-0.00394794	-0.00467509		-69.9875	-69.9875	-69.8624	-69.362	-68.0173	-66.0159	-63.4516	-61.544	-59.6364	-58.4167	-58.104	-58.2917
9.62	-0.00203763	-0.0020371	-0.00203514	-0.00203479	-0.00203782	-0.00207185	-0.00217964	-0.00240792	-0.00277966	-0.00331434	-0.00396608	-0.00469652		-70.1126	-70.0501	-69.925	-69.5809	-68.0799	-66.0159	-63.5767	-61.5127	-59.6989	-58.6356	-58.1978	-58.448
9.64	-0.00203741	-0.00203786	-0.00203499	-0.00203287	-0.00203751	-0.00207315	-0.00218173	-0.00241152	-0.00278985	-0.00332656	-0.00398402	-0.00470948		-70.0501	-70.0501	-69.8625	-69.3934	-67.9548	-65.9221	-63.4204	-61.3251	-59.6989	-58.6044	-58.2917	-58.3855
9.66	-0.00203817	-0.00203814	-0.00203678	-0.00203628	-0.00204015	-0.0020755	-0.00218658	-0.00241943	-0.00279735	-0.00333562	-0.00399884	-0.00472261		-70.0501	-70.0188	-69.925	-69.5497	-68.0174	-65.8909	-63.4203	-61.3563	-59.5739	-58.4481	-58.2917	-58.3229
9.68	-0.00203893	-0.00203891	-0.00203902	-0.0020358	-0.00204034	-0.00207837	-0.0021888	-0.00242614	-0.00280641	-0.00335071	-0.00401368	-0.00474408		-70.0501	-70.0188	-70.0188	-69.4559	-67.9236	-65.8909	-63.264	-61.3251	-59.5113	-58.5106	-58.2917	-58.4794
9.7	-0.00203921	-0.00203921	-0.00203884	-0.00203536	-0.00204155	-0.00208074	-0.00219328	-0.00243114	-0.0028156	-0.0033608	-0.00402362	-0.0047593		-70.0188	-69.9875	-69.9563	-69.3621	-67.8923	-65.8596	-63.2327	-61.2	-59.4488	-58.3855	-58.1353	-58.4793
9.72	-0.00204046	-0.00203951	-0.00203915	-0.00203639	-0.00204326	-0.00208264	-0.00219831	-0.00243806	-0.00282627	-0.00337691	-0.00404185	-0.00477338		-70.0501	-69.9563	-69.925	-69.3621	-67.8923	-65.7971	-63.2328	-61.1688	-59.4487	-58.4794	-58.2292	-58.448
9.74	-0.00203978	-0.00204031	-0.00203852	-0.00203647	-0.002044	-0.00208557	-0.0022007	-0.0024415	-0.00283284	-0.00338873	-0.00405493	-0.00478873		-69.9563	-69.9563	-69.8312	-69.2996	-67.8298	-65.797	-63.0764	-60.9499	-59.2611	-58.4168	-58.1667	-58.4481
9.76	-0.00204058	-0.00204158	-0.00203841	-0.00203465	-0.00204525	-0.00208701	-0.00220483	-0.00244876	-0.00284182	-0.00340153	-0.00407016	-0.00480056		-69.9563	-69.9875	-69.7687	-69.1119	-67.7985	-65.7033	-63.0138	-60.9185	-59.1673	-58.3855	-58.1666	-58.3543
9.78	-0.00204233	-0.00204284	-0.00204167	-0.00203771	-0.00204846	-0.00209	-0.00221114	-0.00245548	-0.00285303	-0.00341773	-0.00408541	-0.00481974		-70.0188	-70.0188	-69.925	-69.237	-67.8923	-65.7032	-63.0763	-60.856	-59.1673	-58.4793	-58.1666	-58.4481
9.8	-0.0020431	-0.00204313	-0.00204295	-0.00203975	-0.00204871	-0.0020915	-0.0022174	-0.00246228	-0.00286427	-0.00343043	-0.00409869	-0.00483395		-70.0188	-69.9875	-69.9562	-69.2996	-67.7985	-65.6094	-63.1389	-60.7935	-59.1673	-58.448	-58.104	-58.4168
9.82	-0.00204339	-0.00204343	-0.00204279	-0.00204033	-0.00205046	-0.00209356	-0.00222041	-0.00246859	-0.00287135	-0.00344238	-0.00411113	-0.00484826		-69.9875	-69.9563	-69.8937	-69.2682	-67.7984	-65.5469	-63.0138	-60.6996	-58.9796	-58.3855	-58.0102	-58.3855
9.84	-0.00204417	-0.0020447	-0.00204456	-0.0020414	-0.00205124	-0.00209566	-0.00222246	-0.00247562	-0.00288436	-0.00345448	-0.00412787	-0.00486624		-69.9875	-69.9875	-69.9562	-69.2682	-67.7359	-65.4842	-62.8261	-60.637	-59.0421	-58.3229	-58.0415	-58.448
9.86	-0.00204447	-0.00204452	-0.0020444	-0.00204007	-0.00205157	-0.00209481	-0.00222738	-0.00248275	-0.00289308	-0.00346927	-0.0041405	-0.0048793		-69.9563	-69.925	-69.8937	-69.1119	-67.6422	-65.2342	-62.7949	-60.5746	-58.9172	-58.3543	-57.9477	-58.3856
9.88	-0.00204526	-0.00204484	-0.00204473	-0.00204072	-0.00205195	-0.00209613	-0.0022318	-0.00249057	-0.00290625	-0.00348401	-0.0041605	-0.00489493		-69.9563	-69.8937	-69.8625	-69.0807	-67.5484	-65.1091	-62.7324	-60.5434	-58.9797	-58.3856	-58.0728	-58.3856
9.9	-0.00204605	-0.00204614	-0.00204604	-0.00204332	-0.00205334	-0.00209904	-0.00223735	-0.00249603	-0.00291581	-0.00349786	-0.00417715	-0.00491178		-69.9563	-69.925	-69.8937	-69.1744	-67.5171	-65.0778	-62.7324	-60.387	-58.8859	-58.3856	-58.1041	-58.4168
9.92	-0.00204828	-0.00204742	-0.00204782	-0.00204394	-0.00205621	-0.00210298	-0.00224291	-0.00250776	-0.00292909	-0.00351173	-0.00419887	-0.00493219		-70.0501	-69.9563	-69.9563	-69.1432	-67.5795	-65.109	-62.7324	-60.5433	-58.9484	-58.3855	-58.2917	-58.5419
9.94	-0.00204759	-0.00204869	-0.0020462	-0.00204314	-0.00205662	-0.00210741	-0.00224361	-0.00251383	-0.00293589	-0.00352134	-0.00420882	-0.00494136		-69.9563	-69.9875	-69.7999	-69.0181	-67.4857	-65.1716	-62.4509	-60.4183	-58.7295	-58.2291	-58.1353	-58.3855
9.96	-0.00204983	-0.00204899	-0.00204754	-0.00204624	-0.00205951	-0.00211078	-0.00225001	-0.00252556	-0.00295095	-0.00353905	-0.00422745	-0.00495949		-70.0501	-69.9563	-69.8312	-69.1432	-67.5483	-65.1716	-62.4822	-60.5745	-58.8546	-58.3542	-58.2291	-58.4481
9.98	-0.00205202	-0.00205074	-0.00204885	-0.00204833	-0.00206139	-0.00211466	-0.00225746	-0.00253465	-0.00296508	-0.00355825	-0.00424379	-0.00498236		-70.1439	-70.0188	-69.8624	-69.2058	-67.5483	-65.2028	-62.576	-60.6058	-58.9484	-58.5419	-58.2604	-58.6357
10	-0.00205081	-0.00205102	-0.0020492	-0.00204557	-0.00206083	-0.00211447	-0.00226265	-0.00254309	-0.00297547	-0.00356838	-0.00426216	-0.0049937		-70.0188	-69.9875	-69.8312	-68.9555	-67.3919	-64.984	-62.5447	-60.6058	-58.8859	-58.4168	-58.3542	-58.5418
10.02	-0.00205158	-0.00205276	-0.00205004	-0.00204725	-0.00206328	-0.00211849	-0.0022657	-0.0025497	-0.00298599	-0.00358229	-0.00427301	-0.00500654		-70.0188	-70.0501	-69.8312	-68.9868	-67.4232	-65.0152	-62.3883	-60.512	-58.8233	-58.4168	-58.2292	-58.4793
10.04	-0.00205282	-0.00205303	-0.00204991	-0.00204989	-0.00206572	-0.00211995	-0.00227273	-0.00255829	-0.00300028	-0.00359621	-0.00428418	-0.0050245		-70.0501	-70.0188	-69.7687	-69.0807	-67.4545	-64.8902	-62.4509	-60.5121	-58.9171	-58.4168	-58.1041	-58.5419
10.06	-0.00205309	-0.0020538	-0.00205222	-0.00205055	-0.00206667	-0.00212405	-0.00227642	-0.00256566	-0.00301077	-0.00361016	-0.0043041	-0.00503983		-70.0188	-70.0188	-69.8624	-69.0493	-67.3919	-64.9214	-62.3258	-60.4494	-58.8546	-58.4168	-58.2291	-58.5418
10.08	-0.00205338	-0.00205504	-0.00205208	-0.00204929	-0.00206815	-0.00212659	-0.00228079	-0.00257188	-0.00302358	-0.00361973	-0.00431845	-0.00505392		-69.9875	-70.0501	-69.7999	-68.8929	-67.3607	-64.8589	-62.232	-60.3243	-58.8858	-58.2604	-58.1978	-58.5105
10.1	-0.00205319	-0.00205627	-0.00205052	-0.00205053	-0.00206621	-0.00212715	-0.00228527	-0.0025783	-0.00303122	-0.00363408	-0.00432972	-0.00506688		-69.925	-70.0813	-69.6436	-68.893	-67.1105	-64.6713	-62.1382	-60.1993	-58.6982	-58.2604	-58.0728	-58.4481
10.12	-0.00205495	-0.00205749	-0.00205288	-0.00205127	-0.00207078	-0.00213142	-0.0022893	-0.00258927	-0.00304587	-0.00365023	-0.00434983	-0.00508376		-69.9875	-70.1126	-69.7374	-68.8617	-67.2668	-64.7025	-62.013	-60.293	-58.792	-58.3229	-58.1979	-58.4793
10.14	-0.00205572	-0.0020587	-0.00205471	-0.00205396	-0.00207085	-0.00213464	-0.00229733	-0.00259699	-0.00305814	-0.00366271	-0.00436324	-0.00509932		-69.9875	-70.1439	-69.7998	-68.9555	-67.1417	-64.6712	-62.1069	-60.2305	-58.792	-58.2604	-58.1353	-58.4792
10.16	-0.00205602	-0.00206038	-0.00205363	-0.00205226	-0.00207344	-0.00213738	-0.00230195	-0.00260293	-0.00306968	-0.00367623	-0.00438005	-0.00511867		-69.9563	-70.2064	-69.6749	-68.768	-67.173	-64.6087	-62.0131	-60.0743	-58.7608	-58.2291	-58.1666	-58.5731
10.18	-0.00205729	-0.00205962	-0.00205646	-0.00205306	-0.00207454	-0.00214016	-0.00231111	-0.00261288	-0.00308205	-0.00369075	-0.00439249	-0.00513146		-69.9875	-70.1126	-69.7999	-68.7366	-67.1104	-64.5461	-62.1694	-60.1055	-58.7607	-58.2291	-58.0728	-58.5105
10.2	-0.00205806	-0.00206131	-0.00205489	-0.00205291	-0.00207518	-0.00214299	-0.00231566	-0.00262091	-0.00309444	-0.00370349	-0.00440628	-0.00515077		-69.9875	-70.1752	-69.6436	-68.6428	-67.0167	-64.4835	-62.0756	-60.0429	-58.7607	-58.1666	-58.0102	-58.6043
10.22	-0.00205931	-0.0020625	-0.0020587	-0.00205522	-0.00207736	-0.00214485	-0.00232143	-0.00263221	-0.0031061	-0.00372091	-0.00442674	-0.0051673		-70.0188	-70.2064	-69.8312	-68.7053	-67.0167	-64.3585	-62.0444	-60.1367	-58.7295	-58.2604	-58.1353	-58.6356
10.24	-0.00206008	-0.00206125	-0.0020576	-0.00205507	-0.00207805	-0.00215092	-0.00232724	-0.00264021	-0.00312087	-0.00373543	-0.00444039	-0.00518376		-70.0188	-70.0813	-69.7061	-68.6115	-66.9229	-64.4836	-62.013	-60.0742	-58.8233	-58.2604	-58.0728	-58.6669
10.26	-0.00206035	-0.0020644	-0.00205848	-0.00205497	-0.00208027	-0.00215329	-0.00233141	-0.00264702	-0.00313016	-0.00374995	-0.00445639	-0.00520143		-69.9875	-70.2377	-69.706	-68.5177	-66.9228	-64.3897	-61.8879	-59.949	-58.6981	-58.2603	-58.0728	-58.7294
10.28	-0.00206064	-0.00206218	-0.00205985	-0.00205443	-0.00208102	-0.00215625	-0.00233797	-0.00265149	-0.00314504	-0.00376085	-0.00446913	-0.00521382		-69.9563	-70.0501	-69.7374	-68.3927	-66.829	-64.3273	-61.888	-59.699	-58.7921	-58.1354	-57.979	-58.667
10.3	-0.00206239	-0.00206196	-0.0020612	-0.00205589	-0.00208577	-0.00215977	-0.00234397	-0.00266598	-0.00315518	-0.00377756	-0.00449093	-0.00522638		-70.0188	-69.9875	-69.7686	-68.3926	-66.9853	-64.2959	-61.8567	-59.9178	-58.6982	-58.1978	-58.1353	-58.6044
10.32	-0.00206267	-0.0020637	-0.00206255	-0.00205832	-0.00208549	-0.00216281	-0.00234888	-0.00267435	-0.00316858	-0.00379139	-0.00450241	-0.00524299		-69.9875	-70.0501	-69.7999	-68.4552	-66.829	-64.2334	-61.7628	-59.8553	-58.7295	-58.1666	-58.0102	-58.6357
10.34	-0.00206344	-0.00206299	-0.00206387	-0.00205926	-0.00208628	-0.00216693	-0.00235164	-0.00268348	-0.00317964	-0.00380531	-0.00451978	-0.00526082		-69.9875	-69.9563	-69.8311	-68.4239	-66.7352	-64.2333	-61.5439	-59.824	-58.6669	-58.1353	-58.0415	-58.6982
10.36	-0.00206469	-0.00206377	-0.00206422	-0.00205973	-0.00208862	-0.00216742	-0.00235863	-0.00269267	-0.00318929	-0.00382212	-0.00453486	-0.0052759		-70.0188	-69.9563	-69.7999	-68.3614	-66.7352	-64.0145	-61.544	-59.7927	-58.5419	-58.1978	-58.0102	-58.6982
10.38	-0.00206545	-0.00206456	-0.00206458	-0.00206071	-0.00209145	-0.00217173	-0.00236563	-0.00270192	-0.00320464	-0.00383413	-0.00455562	-0.0052962		-70.0188	-69.9563	-69.7686	-68.3301	-66.7665	-64.0145	-61.544	-59.7615	-58.6357	-58.104	-58.1353	-58.8233
10.4	-0.00206621	-0.00206631	-0.00206543	-0.00206268	-0.00209227	-0.00217552	-0.00237377	-0.00271123	-0.00321749	-0.00384733	-0.0045772	-0.00531226		-70.0188	-70.0188	-69.7687	-68.3614	-66.6727	-63.9832	-61.6065	-59.7302	-58.6357	-58.0415	-58.2917	-58.8546
10.42	-0.00206745	-0.00206706	-0.00206726	-0.00206367	-0.00209465	-0.00217882	-0.00237899	-0.0027193	-0.00323036	-0.00386163	-0.00458827	-0.00532956		-70.0501	-70.0188	-69.8312	-68.3301	-66.6727	-63.9207	-61.5127	-59.6365	-58.6357	-58.0102	-58.1666	-58.9171
10.44	-0.00206674	-0.00206782	-0.00206469	-0.0020632	-0.00209503	-0.00218321	-0.0023849	-0.00273016	-0.0032409	-0.00387982	-0.0046042	-0.00533619		-69.9563	-70.0188	-69.6124	-68.205	-66.5476	-63.9207	-61.4502	-59.6677	-58.5419	-58.1041	-58.1666	-58.7296
10.46	-0.002068	-0.00206906	-0.00206561	-0.00206279	-0.00209499	-0.00218604	-0.00239262	-0.00273834	-0.003254	-0.00389591	-0.00462127	-0.0053565		-69.9875	-70.0501	-69.6123	-68.0799	-66.3912	-63.8269	-61.4814	-59.5738	-58.5418	-58.1353	-58.1978	-58.8545
10.48	-0.00206926	-0.00206786	-0.00206652	-0.00206343	-0.00209803	-0.00219052	-0.00240204	-0.00274868	-0.00326713	-0.00391194	-0.00464171	-0.00536857		-70.0188	-69.925	-69.6122	-68.0174	-66.4225	-63.8269	-61.6066	-59.5738	-58.5419	-58.1665	-58.323	-58.792
10.5	-0.00206953	-0.00206817	-0.00206598	-0.00206409	-0.00209856	-0.00219448	-0.002409	-0.0027597	-0.00328028	-0.00392315	-0.0046584	-0.00538479		-69.9875	-69.8937	-69.5184	-67.9548	-66.2974	-63.7955	-61.6065	-59.6051	-58.5418	-58.0415	-58.3542	-58.8233
10.52	-0.00207078	-0.00206995	-0.00206645	-0.00206673	-0.00210116	-0.00219742	-0.00241772	-0.00276868	-0.00329346	-0.00394139	-0.00467159	-0.00539828		-70.0188	-69.9563	-69.4871	-68.0174	-66.2974	-63.7017	-61.7003	-59.5426	-58.5419	-58.1353	-58.2917	-58.792
10.54	-0.00207105	-0.00207121	-0.00206694	-0.00206739	-0.00210477	-0.00220043	-0.00242634	-0.00277911	-0.00330585	-0.00395172	-0.00468497	-0.00541719		-69.9875	-69.9875	-69.4559	-67.9548	-66.3599	-63.6079	-61.7942	-59.5425	-58.5105	-57.9789	-58.2291	-58.8858
10.56	-0.0020723	-0.00207149	-0.00206549	-0.00207053	-0.00210483	-0.00220618	-0.00243075	-0.00279294	-0.00331752	-0.0039702	-0.0047066	-0.00543319		-70.0188	-69.9563	-69.2996	-68.0487	-66.2036	-63.6705	-61.669	-59.6989	-58.448	-58.0728	-58.3855	-58.9171
10.58	-0.00207305	-0.0020713	-0.00206897	-0.00207166	-0.00210599	-0.00221028	-0.00243649	-0.00280179	-0.00333015	-0.00398458	-0.00471858	-0.00544509		-70.0188	-69.8937	-69.4559	-68.0173	-66.1098	-63.6392	-61.6065	-59.6364	-58.4168	-58.0415	-58.2917	-58.8546
10.6	-0.00207429	-0.00207259	-0.00206946	-0.00207428	-0.00210821	-0.00221282	-0.00244349	-0.00281347	-0.00334531	-0.00400394	-0.00473663	-0.00545851		-70.0501	-69.925	-69.4246	-68.0799	-66.0785	-63.5142	-61.6066	-59.699	-58.4793	-58.1666	-58.3543	-58.8234
10.62	-0.00207455	-0.00207192	-0.00207142	-0.00207441	-0.00210845	-0.00221707	-0.00244696	-0.00282166	-0.00336035	-0.00401714	-0.0047522	-0.00546665		-70.0188	-69.8312	-69.4871	-67.9861	-65.9221	-63.4829	-61.4189	-59.6051	-58.5418	-58.104	-58.3542	-58.667
10.64	-0.0020753	-0.00207274	-0.00207044	-0.00207508	-0.00211079	-0.00222028	-0.00245184	-0.00283344	-0.00337447	-0.00403741	-0.00476779	-0.00548332		-70.0188	-69.8312	-69.3621	-67.9235	-65.8908	-63.3891	-61.2938	-59.6676	-58.5731	-58.2604	-58.3542	-58.6982
10.66	-0.00207557	-0.00207406	-0.00207341	-0.00207725	-0.00211265	-0.00222464	-0.00245925	-0.00284032	-0.0033828	-0.00405139	-0.00477987	-0.0054945		-69.9875	-69.8624	-69.4871	-67.9548	-65.8283	-63.3577	-61.2937	-59.5113	-58.3855	-58.2291	-58.2603	-58.6043
10.68	-0.00207584	-0.00207584	-0.00207242	-0.00207695	-0.00211506	-0.00222637	-0.00246548	-0.00284885	-0.00339731	-0.00406547	-0.00480047	-0.00551547		-69.9563	-69.925	-69.3621	-67.8298	-65.7971	-63.1702	-61.2313	-59.4175	-58.4168	-58.1979	-58.3856	-58.7295
10.7	-0.00207759	-0.00207712	-0.00207344	-0.00207967	-0.002119	-0.00223255	-0.00247239	-0.00286032	-0.00341012	-0.00407864	-0.00481956	-0.00553474		-70.0188	-69.9563	-69.3621	-67.8923	-65.8596	-63.2327	-61.2	-59.4488	-58.3855	-58.1353	-58.4793	-58.8233
10.72	-0.00207786	-0.00207643	-0.00207348	-0.00208038	-0.00211987	-0.00223654	-0.00247815	-0.00286966	-0.00342468	-0.00409499	-0.00483131	-0.00554556		-69.9875	-69.8624	-69.2995	-67.8297	-65.7345	-63.1702	-61.1062	-59.3861	-58.4168	-58.1666	-58.3854	-58.7295
10.74	-0.00207911	-0.00207773	-0.0020755	-0.00208309	-0.00212487	-0.00224112	-0.00248404	-0.00287914	-0.00344003	-0.00411229	-0.00485165	-0.00556486		-70.0188	-69.8937	-69.3621	-67.8923	-65.8595	-63.1389	-61.0124	-59.3236	-58.4793	-58.2292	-58.5106	-58.8233
10.76	-0.00207937	-0.00207707	-0.0020731	-0.0020838	-0.00212574	-0.00224465	-0.00249065	-0.00288733	-0.00345192	-0.00412643	-0.00486213	-0.00558117		-69.9875	-69.7999	-69.1431	-67.8297	-65.7345	-63.045	-60.9497	-59.1985	-58.4167	-58.1978	-58.3855	-58.8545
10.78	-0.00208013	-0.00207937	-0.00207519	-0.00208603	-0.0021277	-0.0022499	-0.00249615	-0.00289716	-0.00346649	-0.00413966	-0.00487894	-0.00559603		-69.9875	-69.8937	-69.2057	-67.861	-65.6719	-63.045	-60.8247	-59.136	-58.448	-58.1353	-58.4168	-58.8545
10.8	-0.00208041	-0.00208017	-0.00207676	-0.00208576	-0.00212869	-0.00225569	-0.00250243	-0.00290782	-0.00347848	-0.00415205	-0.00489208	-0.00560537		-69.9563	-69.8937	-69.2371	-67.736	-65.5469	-63.0764	-60.731	-59.1048	-58.3855	-58.0415	-58.3543	-58.7295
10.82	-0.00208167	-0.00208097	-0.00207832	-0.00208853	-0.0021318	-0.00225983	-0.00251005	-0.00291644	-0.00349232	-0.00416673	-0.00490902	-0.00562893		-69.9875	-69.8937	-69.2682	-67.7984	-65.5469	-63.0138	-60.6996	-58.9796	-58.3855	-58.0102	-58.3855	-58.9171
10.84	-0.00208194	-0.00208225	-0.00207888	-0.00208879	-0.00213337	-0.00226131	-0.00251651	-0.00292884	-0.00350362	-0.00418254	-0.00492589	-0.00564085		-69.9563	-69.925	-69.237	-67.7047	-65.453	-62.7949	-60.6058	-59.0109	-58.2917	-58.0103	-58.4168	-58.8546
10.86	-0.00208272	-0.00208255	-0.00207799	-0.00208959	-0.00213298	-0.00226682	-0.00252432	-0.00293836	-0.00351943	-0.00419632	-0.00494027	-0.00566132		-69.9563	-69.8937	-69.1119	-67.6422	-65.2342	-62.7949	-60.5746	-58.9172	-58.3543	-57.9477	-58.3856	-58.9797
10.88	-0.00208447	-0.00208384	-0.0020796	-0.00209092	-0.0021353	-0.00227234	-0.0025334	-0.00295305	-0.00353598	-0.00421851	-0.00495839	-0.00567587		-70.0188	-69.925	-69.1432	-67.6109	-65.1716	-62.7949	-60.6059	-59.0422	-58.4481	-58.1353	-58.4481	-58.9797
10.9	-0.00208424	-0.00208413	-0.0020812	-0.00209128	-0.00213714	-0.00227676	-0.00253756	-0.0029611	-0.00354804	-0.00423302	-0.0049727	-0.00568341		-69.9563	-69.8937	-69.1744	-67.5171	-65.0778	-62.7324	-60.387	-58.8859	-58.3856	-58.1041	-58.4168	-58.8233
10.92	-0.0020855	-0.00208493	-0.00208082	-0.00209317	-0.00214008	-0.00228125	-0.00254816	-0.00297304	-0.00356026	-0.00425282	-0.00499078	-0.00570263		-69.9875	-69.8937	-69.0806	-67.5169	-65.0464	-62.6698	-60.4807	-58.8858	-58.3229	-58.2291	-58.4793	-58.917
10.94	-0.00208724	-0.00208572	-0.00208245	-0.00209605	-0.00214714	-0.00228471	-0.00255742	-0.00298356	-0.00357437	-0.00426816	-0.00500626	-0.00572161		-70.0501	-69.8937	-69.1119	-67.5795	-65.2654	-62.5447	-60.5121	-58.8233	-58.3229	-58.2291	-58.4793	-59.0109
10.96	-0.00208699	-0.00208456	-0.00208308	-0.00209642	-0.00214788	-0.0022883	-0.00256602	-0.00299494	-0.00358763	-0.00428142	-0.00501805	-0.00573186		-69.9875	-69.7686	-69.0806	-67.4857	-65.109	-62.4196	-60.5119	-58.792	-58.2916	-58.1665	-58.3855	-58.9171
10.98	-0.00208873	-0.00208541	-0.0020847	-0.00209783	-0.00215131	-0.00229532	-0.00257464	-0.00300858	-0.00360625	-0.00429697	-0.00504	-0.00574804		-70.0501	-69.7686	-69.112	-67.4545	-65.109	-62.4822	-60.512	-58.8546	-58.4481	-58.1666	-58.5419	-58.9484
11	-0.00208897	-0.00208723	-0.00208337	-0.00209876	-0.00215268	-0.00230229	-0.00258514	-0.00302139	-0.00361926	-0.00431886	-0.00505534	-0.00575847		-70.0188	-69.8312	-68.9555	-67.3919	-64.984	-62.5447	-60.6058	-58.8859	-58.4168	-58.3542	-58.5418	-58.8546
11.02	-0.00208923	-0.00208756	-0.00208455	-0.00210072	-0.0021562	-0.00230477	-0.00259114	-0.00303123	-0.00363236	-0.00432866	-0.00506696	-0.00577201		-69.9875	-69.7999	-68.9555	-67.3919	-64.9839	-62.357	-60.4807	-58.792	-58.3855	-58.1979	-58.448	-58.8233
11.04	-0.00209047	-0.00208741	-0.00208722	-0.00210318	-0.00215766	-0.00231189	-0.00259984	-0.00304569	-0.00364644	-0.00433993	-0.00508509	-0.0057885		-70.0188	-69.7374	-69.0494	-67.4232	-64.8589	-62.4196	-60.4808	-58.8858	-58.3855	-58.0728	-58.5106	-58.8546
11.06	-0.00209122	-0.00209023	-0.00208836	-0.00210462	-0.00216231	-0.00231616	-0.00260791	-0.00305703	-0.00366143	-0.00436113	-0.00510182	-0.00580205		-70.0188	-69.8624	-69.0493	-67.3919	-64.9214	-62.3258	-60.4494	-58.8546	-58.4168	-58.2291	-58.5418	-58.8233
11.08	-0.00209147	-0.00209005	-0.00208705	-0.00210608	-0.00216485	-0.00232054	-0.00261415	-0.00306994	-0.00367101	-0.00437554	-0.00511595	-0.00581713		-69.9875	-69.7999	-68.8929	-67.3607	-64.8589	-62.232	-60.3243	-58.8858	-58.2604	-58.1978	-58.5105	-58.8232
11.1	-0.00209272	-0.0020899	-0.00208974	-0.00210555	-0.00216692	-0.00232669	-0.00262247	-0.00307982	-0.00368813	-0.00439005	-0.00513272	-0.00584086		-70.0188	-69.7374	-68.9868	-67.2043	-64.7651	-62.232	-60.2931	-58.792	-58.3542	-58.1666	-58.5419	-59.0109
11.12	-0.00209297	-0.00209076	-0.00208894	-0.00210861	-0.00216957	-0.00232893	-0.00263149	-0.00309214	-0.00370147	-0.00440681	-0.00514561	-0.00585541		-69.9875	-69.7374	-68.8617	-67.2668	-64.7025	-62.013	-60.293	-58.792	-58.3229	-58.1979	-58.4793	-59.0109
11.14	-0.00209471	-0.00209358	-0.00209263	-0.00210964	-0.00217384	-0.00233816	-0.00264052	-0.00310599	-0.0037158	-0.00442243	-0.00516376	-0.00587287		-70.0501	-69.8624	-69.0181	-67.2043	-64.7338	-62.1695	-60.2931	-58.8546	-58.323	-58.1979	-58.5418	-59.0735
11.16	-0.00209593	-0.0020934	-0.00209182	-0.0021132	-0.00217756	-0.00234383	-0.00264764	-0.00311899	-0.00373106	-0.00444132	-0.00518558	-0.0058916		-70.0813	-69.7999	-68.893	-67.298	-64.7337	-62.1381	-60.1993	-58.8858	-58.3541	-58.2916	-58.6981	-59.1672
11.18	-0.00209517	-0.00209423	-0.00209057	-0.0021122	-0.00217815	-0.00235068	-0.00265491	-0.00312815	-0.00374171	-0.0044491	-0.00519294	-0.005897		-69.9875	-69.7999	-68.7366	-67.1104	-64.5461	-62.1694	-60.1055	-58.7607	-58.2291	-58.0728	-58.5105	-58.9797
11.2	-0.0020974	-0.00209407	-0.00209185	-0.00211432	-0.00218254	-0.00235693	-0.0026649	-0.0031429	-0.00375725	-0.00446621	-0.00521619	-0.00591604		-70.0813	-69.7374	-68.7366	-67.1105	-64.5773	-62.1694	-60.1367	-58.8545	-58.2604	-58.104	-58.6981	-59.0734
11.22	-0.00209665	-0.00209591	-0.00209215	-0.00211442	-0.00218221	-0.00236035	-0.00267357	-0.00315138	-0.00377089	-0.00448216	-0.00522738	-0.00592898		-69.9875	-69.7999	-68.674	-66.9854	-64.3272	-62.0131	-60.1054	-58.6982	-58.2291	-58.104	-58.6043	-59.0422
11.24	-0.00209888	-0.00209625	-0.00209346	-0.00211661	-0.00218993	-0.00236793	-0.00268359	-0.00316862	-0.00378832	-0.00449923	-0.00524787	-0.00594495		-70.0813	-69.7686	-68.674	-66.9854	-64.5461	-62.0755	-60.1367	-58.8858	-58.3229	-58.1353	-58.7294	-59.0735
11.26	-0.0020991	-0.00209709	-0.00209329	-0.00211879	-0.00219223	-0.00237202	-0.00269033	-0.00317781	-0.00380278	-0.00451514	-0.00526544	-0.0059579		-70.0501	-69.7686	-68.5803	-66.9854	-64.4523	-61.9505	-60.0116	-58.7607	-58.3229	-58.1354	-58.792	-59.0423
11.28	-0.00209884	-0.00209793	-0.00209218	-0.00211896	-0.00219461	-0.00237797	-0.00269401	-0.00319191	-0.00381262	-0.00452663	-0.00527636	-0.00596947		-69.9875	-69.7686	-68.4239	-66.8602	-64.3585	-61.9192	-59.7302	-58.8233	-58.1666	-58.0102	-58.6982	-58.9796
11.3	-0.00210009	-0.00209876	-0.00209311	-0.00212324	-0.00219758	-0.00238339	-0.00270794	-0.00320124	-0.00382843	-0.00454737	-0.00528755	-0.00598565		-70.0188	-69.7686	-68.3926	-66.9853	-64.2959	-61.8567	-59.9178	-58.6982	-58.1978	-58.1353	-58.6044	-59.0109
11.32	-0.00210083	-0.00210059	-0.00209604	-0.00212341	-0.00220114	-0.00238889	-0.00271701	-0.00321552	-0.00384326	-0.00455999	-0.00530554	-0.00600027		-70.0188	-69.8312	-68.4865	-66.8603	-64.2647	-61.7941	-59.8866	-58.7608	-58.1979	-58.0415	-58.667	-59.0109
11.34	-0.00210058	-0.00210091	-0.00209596	-0.00212314	-0.00220419	-0.00239043	-0.00272482	-0.00322499	-0.00385529	-0.00457511	-0.00532074	-0.0060149		-69.9563	-69.7999	-68.3927	-66.704	-64.2021	-61.5127	-59.7928	-58.6357	-58.1041	-58.0103	-58.667	-59.0109
11.36	-0.00210184	-0.00210124	-0.00209641	-0.00212549	-0.00220466	-0.0023975	-0.0027341	-0.00323473	-0.00387227	-0.00459033	-0.00533596	-0.00602954		-69.9875	-69.7686	-68.3301	-66.7039	-63.9832	-61.5127	-59.7614	-58.5106	-58.1665	-57.9789	-58.6669	-59.0109
11.38	-0.0021021	-0.00210109	-0.00209689	-0.00212785	-0.00220849	-0.002404	-0.0027428	-0.00324948	-0.00388345	-0.00461019	-0.00535514	-0.00603971		-69.9563	-69.7061	-68.2676	-66.704	-63.952	-61.4815	-59.699	-58.5732	-58.0415	-58.0728	-58.7608	-58.9172
11.4	-0.00210335	-0.00210245	-0.00209939	-0.00212919	-0.00221287	-0.00241286	-0.00275293	-0.00326332	-0.00389781	-0.00463321	-0.00537276	-0.00606062		-69.9875	-69.7374	-68.3301	-66.6414	-63.9519	-61.5752	-59.6989	-58.6044	-58.0102	-58.2604	-58.8233	-59.0422
11.42	-0.00210312	-0.0021028	-0.00209888	-0.00213006	-0.0022146	-0.00241638	-0.00275907	-0.00327395	-0.0039094	-0.00464096	-0.00538624	-0.00607519		-69.925	-69.7061	-68.205	-66.5476	-63.7956	-61.3876	-59.5114	-58.5106	-57.8851	-58.0415	-58.792	-59.0423
11.44	-0.00210636	-0.00210416	-0.0021024	-0.00213453	-0.00222338	-0.00242713	-0.00277558	-0.00329117	-0.00393569	-0.00466644	-0.00540381	-0.00609577		-70.0813	-69.7374	-68.33	-66.6726	-64.0457	-61.5752	-59.7927	-58.6669	-58.2291	-58.2916	-58.8546	-59.1673
11.46	-0.00210559	-0.00210303	-0.0020999	-0.00213233	-0.00222395	-0.0024324	-0.00278089	-0.00330089	-0.00394771	-0.00467867	-0.00541854	-0.00611299		-69.9875	-69.6123	-68.0799	-66.3912	-63.8269	-61.4814	-59.5738	-58.5418	-58.1353	-58.1978	-58.8545	-59.2298
11.48	-0.00210535	-0.00210245	-0.00209901	-0.00213386	-0.00222685	-0.00244014	-0.00278927	-0.00331168	-0.00396093	-0.00469577	-0.00542661	-0.00612249		-69.925	-69.5184	-67.9236	-66.3287	-63.7331	-61.5128	-59.48	-58.4481	-58.0727	-58.2292	-58.6982	-59.1361
11.5	-0.00210761	-0.00210388	-0.00210168	-0.00213645	-0.00223304	-0.00244962	-0.00280323	-0.00332834	-0.00397628	-0.00471743	-0.00544852	-0.00614286		-70.0188	-69.5497	-67.9861	-66.3287	-63.8268	-61.6378	-59.6364	-58.5731	-58.0728	-58.3855	-58.8546	-59.2611
11.52	-0.00210884	-0.00210431	-0.00210432	-0.00213903	-0.00223594	-0.00245837	-0.0028122	-0.00334153	-0.00399456	-0.00473057	-0.00546194	-0.0061553		-70.0501	-69.5184	-68.0487	-66.3287	-63.733	-61.7316	-59.5739	-58.5732	-58.1666	-58.323	-58.8233	-59.2299
11.54	-0.00210907	-0.00210475	-0.00210494	-0.00214263	-0.00223892	-0.00246701	-0.00282265	-0.00335391	-0.00400482	-0.00474389	-0.00548086	-0.00617086		-70.0188	-69.4872	-67.9861	-66.3912	-63.6392	-61.8255	-59.5738	-58.5418	-58.0102	-58.2604	-58.9171	-59.2611
11.56	-0.00211129	-0.00210422	-0.00210907	-0.00214365	-0.00224575	-0.00247258	-0.00283791	-0.0033672	-0.0040253	-0.00476791	-0.00549953	-0.00618635		-70.1126	-69.3934	-68.1425	-66.2974	-63.7643	-61.7628	-59.7927	-58.5418	-58.1666	-58.4793	-59.0109	-59.2924
11.58	-0.0021105	-0.0021062	-0.00210864	-0.00214319	-0.00224816	-0.00247643	-0.00284458	-0.00337724	-0.00403655	-0.00477614	-0.00550711	-0.00619716		-70.0188	-69.4559	-68.0173	-66.1098	-63.6392	-61.6065	-59.6364	-58.4168	-58.0415	-58.2917	-58.8546	-59.2298
11.6	-0.00211173	-0.00210667	-0.00211126	-0.0021454	-0.00225068	-0.00248347	-0.00285635	-0.00339249	-0.00405604	-0.00479428	-0.00552056	-0.00621582		-70.0501	-69.4246	-68.0799	-66.0785	-63.5142	-61.6066	-59.699	-58.4793	-58.1666	-58.3543	-58.8234	-59.3236
11.62	-0.00211096	-0.00210764	-0.00211036	-0.00214457	-0.00225386	-0.00248572	-0.00286317	-0.00340598	-0.0040673	-0.00480755	-0.00552593	-0.00622654		-69.9563	-69.4246	-67.9236	-65.8596	-63.4204	-61.3564	-59.5426	-58.4793	-58.0415	-58.2917	-58.6045	-59.2611
11.64	-0.00211321	-0.00210812	-0.00211253	-0.00214849	-0.00225874	-0.00249248	-0.00287723	-0.00342282	-0.00409086	-0.00482692	-0.00554695	-0.00624515		-70.0501	-69.3934	-67.9548	-65.9221	-63.4204	-61.3251	-59.6989	-58.6044	-58.2917	-58.3855	-58.7295	-59.355
11.66	-0.00211244	-0.0021101	-0.00211369	-0.00214929	-0.00226201	-0.00249868	-0.00288267	-0.00342941	-0.00410282	-0.00483656	-0.0055553	-0.00625268		-69.9563	-69.4559	-67.9236	-65.7971	-63.3265	-61.2625	-59.4801	-58.3543	-58.1979	-58.2291	-58.5731	-59.2299
11.68	-0.00211419	-0.00211057	-0.00211486	-0.00215325	-0.00226536	-0.00250679	-0.00289338	-0.00344659	-0.00412005	-0.00486094	-0.00558058	-0.00626986		-70.0188	-69.4246	-67.8923	-65.8596	-63.2327	-61.2938	-59.48	-58.4793	-58.2604	-58.4481	-58.792	-59.2924
11.7	-0.00211492	-0.00211055	-0.00211655	-0.00215614	-0.00227043	-0.00251244	-0.00290341	-0.00345764	-0.00413109	-0.00487757	-0.005597	-0.00628841		-70.0188	-69.3621	-67.8923	-65.8596	-63.2327	-61.2	-59.4488	-58.3855	-58.1353	-58.4793	-58.8233	-59.3862
11.72	-0.00211566	-0.00211105	-0.00211774	-0.00215749	-0.00227497	-0.00251882	-0.00291351	-0.00347314	-0.00414854	-0.00489053	-0.0056092	-0.00630205		-70.0188	-69.3308	-67.861	-65.7658	-63.2015	-61.1375	-59.4174	-58.4481	-58.1979	-58.4167	-58.7608	-59.3862
11.74	-0.00211589	-0.00211207	-0.00211944	-0.00216148	-0.00227844	-0.00252346	-0.00292155	-0.00348682	-0.00416383	-0.0049085	-0.00562573	-0.00631412		-69.9875	-69.3308	-67.861	-65.8282	-63.1076	-60.9811	-59.2923	-58.448	-58.1979	-58.4793	-58.792	-59.3549
11.76	-0.00211763	-0.00211109	-0.00212165	-0.00216388	-0.00228364	-0.00253198	-0.00293196	-0.00350139	-0.00418117	-0.00492269	-0.00564636	-0.00632786		-70.0501	-69.2057	-67.8923	-65.7971	-63.1076	-61.0123	-59.2611	-58.4793	-58.2604	-58.4481	-58.9171	-59.355
11.78	-0.00211785	-0.00211266	-0.00212333	-0.00216526	-0.0022883	-0.00253679	-0.00294101	-0.00351505	-0.00419326	-0.00493818	-0.00565968	-0.00634786		-70.0188	-69.237	-67.8923	-65.7032	-63.0763	-60.856	-59.1673	-58.4793	-58.1666	-58.4481	-58.8858	-59.48
11.8	-0.00211808	-0.00211421	-0.00212301	-0.0021662	-0.0022941	-0.00254304	-0.00295167	-0.00352701	-0.0042056	-0.00495126	-0.0056689	-0.0063628		-69.9875	-69.2683	-67.7672	-65.5781	-63.1076	-60.7622	-59.136	-58.4167	-58.0727	-58.3855	-58.7607	-59.5112
11.82	-0.00211982	-0.00211624	-0.00212627	-0.00216981	-0.00229876	-0.00255127	-0.00296097	-0.00354172	-0.00422129	-0.00496941	-0.00569391	-0.00637294		-70.0501	-69.3308	-67.861	-65.6095	-63.0764	-60.7622	-59.0422	-58.4481	-58.0728	-58.4481	-58.9797	-59.4487
11.84	-0.00212004	-0.00211675	-0.00212646	-0.00217132	-0.00230014	-0.00255765	-0.00297333	-0.00355292	-0.004237	-0.00498617	-0.00570566	-0.00638957		-70.0188	-69.2995	-67.7672	-65.5155	-62.8574	-60.6683	-59.0734	-58.3542	-58.0728	-58.4793	-58.9171	-59.5113
11.86	-0.00211978	-0.00211479	-0.0021262	-0.00216979	-0.00230451	-0.00256418	-0.00298132	-0.00356695	-0.00424858	-0.00499796	-0.00572323	-0.00640129		-69.9563	-69.1119	-67.6422	-65.2342	-62.7949	-60.5746	-58.9172	-58.3543	-57.9477	-58.3856	-58.9797	-59.4801
11.88	-0.00212152	-0.0021164	-0.00212751	-0.00217209	-0.00231005	-0.00257333	-0.00299614	-0.00358362	-0.00427093	-0.00501617	-0.00573781	-0.00641467		-70.0188	-69.1432	-67.6109	-65.1716	-62.7949	-60.6059	-59.0422	-58.4481	-58.1353	-58.4481	-58.9797	-59.48
11.9	-0.00212126	-0.00211798	-0.00212783	-0.00217391	-0.00231448	-0.00257746	-0.0030042	-0.00359573	-0.0042855	-0.00503052	-0.00574531	-0.00643282		-69.9563	-69.1744	-67.5171	-65.0778	-62.7324	-60.387	-58.8859	-58.3856	-58.1041	-58.4168	-58.8233	-59.5738
11.92	-0.00212251	-0.00211757	-0.00212971	-0.00217685	-0.00231898	-0.00258815	-0.00301621	-0.00360799	-0.00430542	-0.00504869	-0.00576461	-0.00644595		-69.9875	-69.0806	-67.5169	-65.0464	-62.6698	-60.4807	-58.8858	-58.3229	-58.2291	-58.4793	-58.917	-59.5738
11.94	-0.00212275	-0.00211769	-0.00213109	-0.00218241	-0.00232075	-0.00259559	-0.00302458	-0.00361953	-0.00431766	-0.00506048	-0.0057794	-0.00645429		-69.9563	-69.0181	-67.4857	-65.1716	-62.4509	-60.4183	-58.7295	-58.2291	-58.1353	-58.3855	-58.9171	-59.48
11.96	-0.002124	-0.00211983	-0.00213299	-0.00218475	-0.00232611	-0.00260626	-0.00303841	-0.00363573	-0.00433439	-0.00507629	-0.00579419	-0.00647248		-69.9875	-69.0806	-67.4857	-65.109	-62.4196	-60.5119	-58.792	-58.2916	-58.1665	-58.3855	-58.9171	-59.5738
11.98	-0.00212474	-0.00212045	-0.00213337	-0.00218714	-0.00233206	-0.00261367	-0.00305066	-0.0036527	-0.00434788	-0.00509587	-0.00580756	-0.00648081		-69.9875	-69.0494	-67.3919	-65.0464	-62.4196	-60.4494	-58.792	-58.3855	-58.104	-58.4793	-58.8858	-59.48
12	-0.00212648	-0.00212058	-0.00213583	-0.0021901	-0.00234083	-0.00262624	-0.00306591	-0.0036686	-0.0043733	-0.00511521	-0.00582247	-0.00649904		-70.0501	-68.9868	-67.4232	-65.0153	-62.576	-60.6371	-58.9172	-58.4481	-58.3855	-58.5731	-58.8859	-59.5739
12.02	-0.00212719	-0.00212224	-0.00213827	-0.00219413	-0.00234381	-0.00263284	-0.00307647	-0.00368258	-0.00438408	-0.00512801	-0.00583738	-0.00651056		-70.0501	-69.0181	-67.4545	-65.0465	-62.4196	-60.5433	-58.8546	-58.4481	-58.2605	-58.5106	-58.8859	-59.5426
12.04	-0.00212741	-0.00212389	-0.00213968	-0.00219447	-0.00234978	-0.00264022	-0.00308941	-0.00369479	-0.00439305	-0.00514352	-0.00585085	-0.00652379		-70.0188	-69.0494	-67.4232	-64.8589	-62.4196	-60.4808	-58.8858	-58.3855	-58.0728	-58.5106	-58.8546	-59.5425
12.06	-0.00212713	-0.00212402	-0.00214009	-0.0021981	-0.00235292	-0.00264706	-0.00309931	-0.00370806	-0.00441223	-0.00515777	-0.00586153	-0.00652734		-69.9563	-68.9868	-67.3294	-64.8589	-62.2633	-60.3869	-58.7921	-58.3543	-58.1666	-58.4793	-58.7608	-59.355
12.08	-0.00212938	-0.00212468	-0.0021436	-0.00220278	-0.00235964	-0.00265596	-0.00311544	-0.00372142	-0.00443119	-0.00517721	-0.00588264	-0.00655246		-70.0501	-68.9555	-67.4233	-64.9215	-62.2946	-60.3869	-58.9484	-58.323	-58.2604	-58.5731	-58.8858	-59.5739
12.1	-0.0021286	-0.00212535	-0.00214096	-0.00220267	-0.00236349	-0.00266166	-0.00312221	-0.00373487	-0.00444123	-0.00518876	-0.00590049	-0.00655912		-69.9563	-68.9243	-67.1418	-64.7026	-62.1695	-60.2306	-58.7295	-58.2917	-58.1041	-58.4794	-58.9484	-59.4488
12.12	-0.00212984	-0.00212553	-0.00214509	-0.00220642	-0.0023669	-0.00267211	-0.00313625	-0.00375023	-0.00446043	-0.00520441	-0.00591817	-0.00657589		-69.9875	-68.8617	-67.2668	-64.7025	-62.013	-60.293	-58.792	-58.3229	-58.1979	-58.4793	-59.0109	-59.5113
12.14	-0.00212908	-0.00212674	-0.00214354	-0.00220806	-0.00237335	-0.00267796	-0.00314638	-0.00376006	-0.00447063	-0.00521622	-0.00592837	-0.00658434		-69.8937	-68.8617	-67.0479	-64.5774	-62.0131	-60.1367	-58.6982	-58.1666	-58.0415	-58.3854	-58.9171	-59.4175
12.16	-0.00213135	-0.00212696	-0.00214823	-0.00221297	-0.00238037	-0.00268664	-0.0031613	-0.00377761	-0.00449226	-0.00524119	-0.00595058	-0.00660122		-69.9875	-68.7992	-67.2042	-64.6399	-62.0443	-60.1055	-58.792	-58.2603	-58.1978	-58.6043	-59.0734	-59.48
12.18	-0.00213259	-0.0021277	-0.00214927	-0.00221572	-0.00238967	-0.00269669	-0.00317375	-0.00379221	-0.00450468	-0.00525394	-0.00596206	-0.00662119		-70.0188	-68.7679	-67.1417	-64.5774	-62.2007	-60.1368	-58.792	-58.2604	-58.1041	-58.5418	-59.011	-59.6051
12.2	-0.00213331	-0.00212745	-0.00214983	-0.00221852	-0.00239419	-0.00270474	-0.00318623	-0.00380498	-0.00451846	-0.00527336	-0.00597667	-0.00663099		-70.0188	-68.6741	-67.048	-64.5148	-62.1069	-60.0742	-58.792	-58.1979	-58.0415	-58.6356	-59.0109	-59.5426
12.22	-0.00213454	-0.00212975	-0.00215197	-0.0022203	-0.00239997	-0.00271617	-0.00319795	-0.00382256	-0.0045391	-0.00528993	-0.00599573	-0.00664588		-70.0501	-68.7366	-67.048	-64.3898	-62.0757	-60.168	-58.7608	-58.2917	-58.1666	-58.6669	-59.1048	-59.5739
12.24	-0.00213525	-0.00212951	-0.00215259	-0.00222644	-0.00240579	-0.00272419	-0.00321287	-0.00383715	-0.00455274	-0.00530643	-0.00600711	-0.00666563		-70.0501	-68.6428	-66.9542	-64.5149	-62.0443	-60.1055	-58.8546	-58.2917	-58.1041	-58.6982	-59.0423	-59.699
12.26	-0.00213646	-0.00213032	-0.00215581	-0.00222982	-0.00241107	-0.0027323	-0.00322371	-0.00385363	-0.00457103	-0.00532679	-0.00602314	-0.00667843		-70.0813	-68.6115	-67.0166	-64.4835	-61.9817	-60.0428	-58.7919	-58.3541	-58.1666	-58.8232	-59.0735	-59.6989
12.28	-0.00213665	-0.00212964	-0.00215643	-0.00223269	-0.0024176	-0.00273657	-0.00323862	-0.00386434	-0.00458357	-0.00533894	-0.0060361	-0.00668957		-70.0501	-68.4865	-66.9228	-64.4211	-61.9818	-59.7928	-58.8859	-58.2292	-58.0728	-58.7608	-59.0422	-59.6676
12.3	-0.00213736	-0.00213002	-0.00216019	-0.00223507	-0.00242238	-0.00274985	-0.00324706	-0.00387914	-0.00460314	-0.00534863	-0.00605065	-0.0066975		-70.0501	-68.4239	-67.0166	-64.3272	-61.888	-59.9491	-58.7295	-58.2291	-58.1666	-58.6357	-59.0422	-59.5738
12.32	-0.00213707	-0.00213194	-0.00215927	-0.00223754	-0.00242668	-0.00275758	-0.00325978	-0.00389207	-0.00461342	-0.00536396	-0.00606222	-0.00670736		-69.9875	-68.4552	-66.829	-64.2334	-61.7628	-59.8553	-58.7295	-58.1666	-58.0102	-58.6357	-58.9796	-59.5113
12.34	-0.0021383	-0.00213335	-0.00216052	-0.00224222	-0.00242996	-0.00276747	-0.00327173	-0.00390707	-0.0046321	-0.00538328	-0.00608147	-0.00672571		-70.0188	-68.4552	-66.7665	-64.2646	-61.5752	-59.8553	-58.6982	-58.1666	-58.0728	-58.7295	-59.0734	-59.6051
12.36	-0.00213902	-0.00213324	-0.00216231	-0.00224205	-0.00243641	-0.00277604	-0.00328057	-0.00392304	-0.00464606	-0.00539703	-0.00609445	-0.00673712		-70.0188	-68.3614	-66.7352	-64.0145	-61.544	-59.7927	-58.5419	-58.1978	-58.0102	-58.6982	-59.0422	-59.5738
12.38	-0.00213924	-0.00213367	-0.00216464	-0.00224585	-0.00244289	-0.00278471	-0.00329534	-0.00393417	-0.00466593	-0.00541621	-0.00610451	-0.00674863		-69.9875	-68.2988	-66.7352	-63.9832	-61.5127	-59.7302	-58.6044	-58.0727	-58.104	-58.792	-58.9484	-59.5425
12.4	-0.00213997	-0.00213566	-0.00216543	-0.00224968	-0.0024512	-0.00279418	-0.00330841	-0.00394754	-0.00468787	-0.00543248	-0.00612391	-0.00675857		-69.9875	-68.3301	-66.6414	-63.9519	-61.5752	-59.6989	-58.6044	-58.0102	-58.2604	-58.8233	-59.0422	-59.48
12.42	-0.0021402	-0.0021356	-0.00216678	-0.00225193	-0.00245529	-0.002801	-0.00331988	-0.00396013	-0.00469674	-0.00544733	-0.00614002	-0.00677706		-69.9563	-68.2363	-66.5789	-63.8269	-61.4189	-59.5427	-58.5419	-57.9164	-58.0728	-58.8233	-59.0736	-59.5739
12.44	-0.00214094	-0.00213661	-0.00216869	-0.00225806	-0.00246314	-0.0028142	-0.00333312	-0.0039817	-0.00471653	-0.00545816	-0.006153	-0.00679193		-69.9563	-68.205	-66.5476	-63.9207	-61.4502	-59.6677	-58.5419	-58.1041	-58.1666	-58.7296	-59.0423	-59.6052
12.46	-0.00214269	-0.00213661	-0.00216907	-0.00226141	-0.00247155	-0.00282313	-0.00334719	-0.00399894	-0.00473493	-0.00548003	-0.00617827	-0.00680502		-70.0188	-68.1112	-66.4225	-63.8582	-61.5127	-59.6051	-58.5731	-58.1666	-58.2291	-58.8858	-59.2611	-59.6051
12.48	-0.00214441	-0.00213768	-0.00217263	-0.00226644	-0.00248168	-0.00283422	-0.00336121	-0.00401605	-0.00475668	-0.00549338	-0.00619376	-0.00682317		-70.0813	-68.0799	-66.485	-63.8894	-61.6691	-59.6363	-58.6044	-58.229	-58.3855	-58.8545	-59.2924	-59.6989
12.5	-0.00214511	-0.00213876	-0.00217356	-0.0022709	-0.00248924	-0.00284597	-0.0033752	-0.00402812	-0.00477452	-0.00551089	-0.00620917	-0.00683598		-70.0813	-68.0486	-66.3912	-63.8893	-61.7003	-59.6989	-58.6356	-58.1353	-58.448	-58.9171	-59.3236	-59.6988
12.52	-0.00214429	-0.00213935	-0.00217403	-0.00227155	-0.00249557	-0.00285211	-0.00338503	-0.00404241	-0.00478283	-0.00551872	-0.00621529	-0.00684204		-69.9875	-67.9861	-66.2661	-63.6704	-61.669	-59.5113	-58.5106	-58.104	-58.2604	-58.7607	-59.1673	-59.5738
12.54	-0.00214452	-0.00213997	-0.00217769	-0.00227458	-0.00250436	-0.00286272	-0.00339762	-0.00405284	-0.00479636	-0.00553791	-0.00623108	-0.00685354		-69.9563	-67.9236	-66.3287	-63.5767	-61.763	-59.5113	-58.4793	-57.9477	-58.1979	-58.8546	-59.1986	-59.5426
12.56	-0.00214576	-0.00214315	-0.00217768	-0.00228042	-0.00250881	-0.00287683	-0.00340946	-0.00407163	-0.00481834	-0.0055541	-0.0062437	-0.00687363		-69.9875	-68.0174	-66.1723	-63.6392	-61.6377	-59.6676	-58.4167	-58.0415	-58.3542	-58.8858	-59.1673	-59.6677
12.58	-0.00214598	-0.00214375	-0.00217829	-0.00228403	-0.00251402	-0.00288512	-0.00342146	-0.00408522	-0.00482926	-0.00556474	-0.00625797	-0.00687974		-69.9563	-67.9548	-66.0473	-63.5767	-61.544	-59.5739	-58.3543	-57.979	-58.2292	-58.7921	-59.1673	-59.5426
12.6	-0.00214773	-0.00214692	-0.00218105	-0.00228714	-0.00252178	-0.00289777	-0.00343778	-0.004106	-0.00484885	-0.00557977	-0.00627843	-0.00690839		-70.0188	-68.0486	-66.0472	-63.4829	-61.5753	-59.6677	-58.448	-58.1353	-58.323	-58.7921	-59.2923	-59.824
12.62	-0.00214794	-0.002147	-0.00218122	-0.00229143	-0.00252524	-0.00290607	-0.00345309	-0.00411937	-0.00486463	-0.00558792	-0.00629234	-0.00691571		-69.9875	-67.9548	-65.8908	-63.4516	-61.3876	-59.5738	-58.5105	-58.0727	-58.3229	-58.6357	-59.2923	-59.7302
12.64	-0.00214968	-0.00214865	-0.00218461	-0.00229576	-0.00253138	-0.00291947	-0.00346913	-0.00414202	-0.00488282	-0.00560757	-0.00630937	-0.00693873		-70.0501	-67.9548	-65.9221	-63.4204	-61.3251	-59.6989	-58.6044	-58.2917	-58.3855	-58.7295	-59.355	-59.9178
12.66	-0.00214937	-0.00215029	-0.0021859	-0.00229957	-0.00253822	-0.00292561	-0.00347655	-0.00415502	-0.00489364	-0.00561727	-0.00631842	-0.00694405		-69.9875	-67.9548	-65.8283	-63.3577	-61.2937	-59.5113	-58.3855	-58.2291	-58.2603	-58.6043	-59.2611	-59.7927
12.68	-0.0021501	-0.00215041	-0.00218882	-0.00230178	-0.00254511	-0.00293491	-0.00349208	-0.00417023	-0.00491568	-0.00563983	-0.00633243	-0.00696004		-69.9875	-67.861	-65.8283	-63.2014	-61.2625	-59.4487	-58.448	-58.2291	-58.4168	-58.7607	-59.2611	-59.8552
12.7	-0.00215133	-0.00215262	-0.00219226	-0.00230746	-0.00255142	-0.00294576	-0.00350409	-0.00418239	-0.00493368	-0.00565779	-0.00635272	-0.00697068		-70.0188	-67.8923	-65.8596	-63.2327	-61.2	-59.4488	-58.3855	-58.1353	-58.4793	-58.8233	-59.3862	-59.824
12.72	-0.00215154	-0.00215327	-0.00219306	-0.00231145	-0.00255721	-0.00295519	-0.00351883	-0.00419891	-0.00494545	-0.0056686	-0.00636479	-0.00698487		-69.9875	-67.8297	-65.7345	-63.1702	-61.1062	-59.3861	-58.4168	-58.1666	-58.3854	-58.7295	-59.3549	-59.8552
12.74	-0.00215226	-0.0021555	-0.00219761	-0.0023155	-0.00256251	-0.00296402	-0.00353352	-0.00421538	-0.00496481	-0.00568668	-0.00637854	-0.00699032		-69.9875	-67.861	-65.8282	-63.1076	-60.9811	-59.2923	-58.448	-58.1979	-58.4793	-58.792	-59.3549	-59.7301
12.76	-0.00215299	-0.00215668	-0.00219895	-0.00231961	-0.00256983	-0.00297304	-0.00354644	-0.00423075	-0.00497659	-0.0057046	-0.00638914	-0.00700306		-69.9875	-67.8297	-65.7345	-63.045	-60.9497	-59.1985	-58.4167	-58.1978	-58.3855	-58.8545	-59.2924	-59.7302
12.78	-0.00215422	-0.00215941	-0.00220141	-0.00232547	-0.00257597	-0.00298369	-0.00356205	-0.0042451	-0.00499477	-0.00572094	-0.00641257	-0.00702101		-70.0188	-67.8923	-65.7032	-63.0763	-60.856	-59.1673	-58.4793	-58.1666	-58.4481	-58.8858	-59.48	-59.824
12.8	-0.00215493	-0.00215955	-0.00220284	-0.00233185	-0.00258286	-0.00299513	-0.00357493	-0.00425851	-0.00500911	-0.00573155	-0.00642914	-0.0070387		-70.0188	-67.7985	-65.6094	-63.1389	-60.7935	-59.1673	-58.448	-58.104	-58.4168	-58.792	-59.5425	-59.9179
12.82	-0.00215463	-0.00216077	-0.00220433	-0.00233426	-0.00258859	-0.00300149	-0.00358616	-0.00427002	-0.00502231	-0.00575094	-0.00643281	-0.00704217		-69.9563	-67.7672	-65.5157	-62.9826	-60.6684	-58.9484	-58.3543	-57.979	-58.3543	-58.8859	-59.3549	-59.7615
12.84	-0.00215587	-0.002162	-0.00220694	-0.00233681	-0.00259638	-0.00301557	-0.00359936	-0.00428815	-0.00504188	-0.00576581	-0.00645295	-0.0070618		-69.9875	-67.7359	-65.4842	-62.8261	-60.637	-59.0421	-58.3229	-58.0415	-58.448	-58.8858	-59.48	-59.8865
12.86	-0.00215659	-0.00216273	-0.00220641	-0.00234234	-0.00260422	-0.0030251	-0.0036153	-0.00430193	-0.00505625	-0.00578639	-0.00646795	-0.00707758		-69.9875	-67.6734	-65.2654	-62.8261	-60.6058	-58.9484	-58.3855	-57.9789	-58.4168	-59.0109	-59.5113	-59.949
12.88	-0.00215731	-0.00216298	-0.00220762	-0.00234675	-0.00261212	-0.0030385	-0.00363023	-0.00432224	-0.00507197	-0.00579805	-0.00647806	-0.00708967		-69.9875	-67.5796	-65.1403	-62.7636	-60.5746	-59.0109	-58.4168	-58.104	-58.4168	-58.9484	-59.4487	-59.949
12.9	-0.00215804	-0.00216431	-0.00221051	-0.00235235	-0.00261754	-0.00304811	-0.00364423	-0.00433906	-0.00508894	-0.00580846	-0.00649958	-0.00709475		-69.9875	-67.5483	-65.109	-62.7636	-60.4182	-58.9171	-58.4168	-58.1353	-58.448	-58.8545	-59.605	-59.824
12.92	-0.00215825	-0.00216514	-0.00221236	-0.00235569	-0.002627	-0.00305865	-0.0036547	-0.0043569	-0.0051046	-0.00582489	-0.00650941	-0.00710019		-69.9563	-67.4857	-65.0152	-62.6386	-60.4495	-58.8546	-58.2917	-58.1979	-58.4481	-58.8858	-59.5426	-59.699
12.94	-0.00215899	-0.00216704	-0.00221852	-0.00235802	-0.00263515	-0.00306784	-0.00366724	-0.00437031	-0.00511775	-0.00584125	-0.00651942	-0.00711479		-69.9563	-67.4857	-65.1716	-62.4509	-60.4183	-58.7295	-58.2291	-58.1353	-58.3855	-58.9171	-59.48	-59.7303
12.96	-0.00216023	-0.00216893	-0.00222085	-0.0023634	-0.0026459	-0.00308177	-0.00368354	-0.00438713	-0.00513361	-0.00585607	-0.00653768	-0.00712753		-69.9875	-67.4857	-65.109	-62.4196	-60.5119	-58.792	-58.2916	-58.1665	-58.3855	-58.9171	-59.5738	-59.7302
12.98	-0.00216095	-0.00216928	-0.00222322	-0.00236938	-0.00265334	-0.00309409	-0.00370062	-0.00440065	-0.00515329	-0.00586946	-0.00654597	-0.00714204		-69.9875	-67.3919	-65.0464	-62.4196	-60.4494	-58.792	-58.3855	-58.104	-58.4793	-58.8858	-59.48	-59.7614
13	-0.00216218	-0.00217122	-0.00222565	-0.00237766	-0.00266538	-0.0031087	-0.00371571	-0.00442518	-0.00517145	-0.00588295	-0.00656264	-0.00715293		-70.0188	-67.3919	-64.984	-62.5447	-60.6058	-58.8859	-58.4168	-58.3542	-58.5418	-58.8546	-59.5426	-59.7302
13.02	-0.00216288	-0.00217368	-0.00222972	-0.00238065	-0.00267204	-0.00311937	-0.00372983	-0.00443606	-0.00518436	-0.00589798	-0.00657425	-0.00716568		-70.0188	-67.4232	-65.0152	-62.3883	-60.512	-58.8233	-58.4168	-58.2292	-58.4793	-58.8546	-59.5113	-59.7302
13.04	-0.00216359	-0.00217561	-0.00223057	-0.00238726	-0.00268014	-0.00313321	-0.00374307	-0.00444618	-0.00520129	-0.00591303	-0.00658921	-0.00718376		-70.0188	-67.4232	-64.8589	-62.4196	-60.4808	-58.8858	-58.3855	-58.0728	-58.5106	-58.8546	-59.5425	-59.824
13.06	-0.0021648	-0.00217753	-0.00223581	-0.00239211	-0.00268894	-0.00314544	-0.00375915	-0.00446875	-0.00521943	-0.00592808	-0.00659757	-0.00719622		-70.0501	-67.4232	-64.9527	-62.3571	-60.4807	-58.8859	-58.4481	-58.2604	-58.5731	-58.8546	-59.4488	-59.824
13.08	-0.00216448	-0.00217843	-0.00223776	-0.00239588	-0.0026945	-0.00315767	-0.00376775	-0.00448208	-0.00523226	-0.00594167	-0.00661436	-0.00720512		-69.9875	-67.3607	-64.8589	-62.232	-60.3243	-58.8858	-58.2604	-58.1978	-58.5105	-58.8232	-59.5113	-59.7614
13.1	-0.00216571	-0.0021778	-0.00223979	-0.0024021	-0.00270291	-0.00316763	-0.00378509	-0.00449669	-0.00524915	-0.00596566	-0.00662771	-0.00722493		-70.0188	-67.2043	-64.7651	-62.232	-60.2931	-58.792	-58.3542	-58.1666	-58.5419	-59.0109	-59.5113	-59.8866
13.12	-0.00216641	-0.0021814	-0.00224297	-0.00240485	-0.00271269	-0.00318087	-0.00379947	-0.00451472	-0.00526338	-0.00598175	-0.0066427	-0.00723362		-70.0188	-67.2981	-64.7338	-62.0443	-60.3243	-58.8233	-58.3542	-58.2292	-58.5106	-59.0422	-59.5426	-59.824
13.14	-0.00216763	-0.00218184	-0.00224671	-0.00241361	-0.00272111	-0.00319406	-0.00381295	-0.00452927	-0.0052803	-0.00599776	-0.0066576	-0.00725147		-70.0501	-67.2043	-64.7338	-62.1695	-60.2931	-58.8546	-58.323	-58.1979	-58.5418	-59.0735	-59.5739	-59.9178
13.16	-0.00216679	-0.00218337	-0.00224829	-0.00241701	-0.00272564	-0.00320411	-0.00382464	-0.00454393	-0.00529716	-0.00601072	-0.00666417	-0.00726186		-69.9563	-67.173	-64.6087	-62.0131	-60.0743	-58.7608	-58.2291	-58.1666	-58.5731	-59.0422	-59.4488	-59.8866
13.18	-0.00216752	-0.00218388	-0.00225052	-0.00242583	-0.00273514	-0.00321592	-0.00383845	-0.00455534	-0.00530871	-0.0060208	-0.00668267	-0.00727954		-69.9563	-67.0792	-64.5149	-62.1382	-60.0743	-58.7295	-58.1979	-58.0416	-58.4793	-58.9485	-59.5426	-59.9804
13.2	-0.00216876	-0.00218497	-0.0022539	-0.00243101	-0.00274398	-0.00322937	-0.00385235	-0.00457045	-0.0053297	-0.00603711	-0.00669427	-0.00729695		-69.9875	-67.0167	-64.4835	-62.0756	-60.0429	-58.7607	-58.1666	-58.0102	-58.6043	-58.9796	-59.5113	-60.0741
13.22	-0.00216999	-0.00218713	-0.00225568	-0.00243685	-0.00275554	-0.00324122	-0.00387012	-0.0045913	-0.00534643	-0.00605634	-0.00670929	-0.0073141		-70.0188	-67.0167	-64.3585	-62.0444	-60.1367	-58.7295	-58.2604	-58.1353	-58.6356	-59.0735	-59.5426	-60.168
13.24	-0.00217171	-0.00218876	-0.00226298	-0.00244391	-0.00276498	-0.00325788	-0.00388675	-0.00460732	-0.00536571	-0.00607081	-0.00673254	-0.00732736		-70.0813	-66.9854	-64.5461	-62.0755	-60.1367	-58.8858	-58.3229	-58.1353	-58.7294	-59.0735	-59.7302	-60.1993
13.26	-0.00217137	-0.00219042	-0.0022647	-0.0024474	-0.00277107	-0.00326632	-0.0039004	-0.00462222	-0.00538211	-0.00608228	-0.00674025	-0.00734053		-70.0188	-66.9541	-64.421	-61.9192	-59.9803	-58.7294	-58.2916	-58.1041	-58.7607	-59.011	-59.6364	-60.2306
13.28	-0.00217258	-0.00219209	-0.00226871	-0.00245521	-0.00277675	-0.00328306	-0.00391319	-0.00463723	-0.00539711	-0.00609845	-0.00675491	-0.00735542		-70.0501	-66.9228	-64.4211	-61.9818	-59.7928	-58.8859	-58.2292	-58.0728	-58.7608	-59.0422	-59.6676	-60.2931
13.3	-0.00217174	-0.0021943	-0.00226944	-0.00245822	-0.00278812	-0.00328911	-0.00392519	-0.00465348	-0.0054028	-0.00610851	-0.00675779	-0.0073574		-69.9563	-66.9228	-64.2334	-61.7942	-59.8553	-58.6357	-58.1353	-58.0728	-58.5419	-58.9484	-59.48	-60.1368
13.32	-0.00217298	-0.00219495	-0.00227361	-0.00246441	-0.00279805	-0.0033045	-0.00394128	-0.00466746	-0.00542245	-0.00612489	-0.00677293	-0.00737075		-69.9875	-66.829	-64.2334	-61.7628	-59.8553	-58.7295	-58.1666	-58.0102	-58.6357	-58.9796	-59.5113	-60.168
13.34	-0.00217369	-0.00219565	-0.00227777	-0.00246708	-0.00280732	-0.0033157	-0.00395538	-0.00468508	-0.00544051	-0.0061427	-0.00678965	-0.00738219		-69.9875	-66.7352	-64.2333	-61.5439	-59.824	-58.6669	-58.1353	-58.0415	-58.6982	-59.0421	-59.5738	-60.168
13.36	-0.00217389	-0.00219693	-0.00227702	-0.00247299	-0.00281529	-0.00332382	-0.00397056	-0.00469802	-0.00545304	-0.00615427	-0.00679948	-0.00739363		-69.9563	-66.6727	-63.952	-61.4815	-59.7302	-58.4794	-58.1353	-57.9477	-58.6357	-58.9797	-59.5113	-60.1681
13.38	-0.00217411	-0.0021993	-0.00228088	-0.00247959	-0.00282411	-0.00333882	-0.00398186	-0.00471817	-0.00547249	-0.00616449	-0.00681117	-0.00740506		-69.925	-66.6727	-63.9207	-61.4502	-59.6677	-58.5419	-58.0102	-58.0415	-58.7295	-58.8859	-59.48	-60.168
13.4	-0.00217587	-0.00220114	-0.00228587	-0.00248922	-0.0028351	-0.00335372	-0.0039974	-0.00474275	-0.00549169	-0.00618721	-0.00682465	-0.00742751		-69.9875	-66.6414	-63.9519	-61.5752	-59.6989	-58.6044	-58.0102	-58.2604	-58.8233	-59.0422	-59.48	-60.3556
13.42	-0.00217709	-0.00220352	-0.00228919	-0.0024945	-0.0028433	-0.00336687	-0.00401197	-0.00475392	-0.00550929	-0.00620643	-0.00684658	-0.00744208		-70.0188	-66.6414	-63.8894	-61.4814	-59.6052	-58.6044	-57.9789	-58.1353	-58.8858	-59.1361	-59.6364	-60.4182
13.44	-0.00217626	-0.0022038	-0.00229366	-0.00250051	-0.00285443	-0.00337759	-0.00403059	-0.00477013	-0.00551586	-0.00621463	-0.0068562	-0.0074399		-69.925	-66.5163	-63.8894	-61.4189	-59.6364	-58.5106	-58.0728	-58.1353	-58.6983	-59.011	-59.5739	-60.1993
13.46	-0.00217904	-0.00220521	-0.00229813	-0.00251023	-0.00286483	-0.00339345	-0.00404998	-0.00479106	-0.00554067	-0.00624322	-0.0068728	-0.00746046		-70.0501	-66.4538	-63.8895	-61.544	-59.6364	-58.6044	-58.1979	-58.2604	-58.9171	-59.2924	-59.6364	-60.3557
13.48	-0.00217921	-0.00220719	-0.00230151	-0.00251859	-0.00287386	-0.00340502	-0.00406413	-0.00480931	-0.00554985	-0.00625402	-0.00688581	-0.00747135		-70.0188	-66.4225	-63.8269	-61.6066	-59.5738	-58.5419	-58.1665	-58.323	-58.792	-59.2299	-59.6364	-60.3557
13.5	-0.00217991	-0.00220813	-0.00230604	-0.00252627	-0.00288579	-0.00341922	-0.0040764	-0.00482742	-0.00556761	-0.00626965	-0.00689881	-0.00748407		-70.0188	-66.3287	-63.8268	-61.6378	-59.6364	-58.5731	-58.0728	-58.3855	-58.8546	-59.2611	-59.6363	-60.3869
13.52	-0.00218163	-0.00221124	-0.00230946	-0.00253576	-0.00289553	-0.00343338	-0.0040959	-0.0048418	-0.00558246	-0.00628365	-0.00691354	-0.00749857		-70.0813	-66.3599	-63.7642	-61.7628	-59.6051	-58.6044	-58.1978	-58.3542	-58.8545	-59.2611	-59.6676	-60.4494
13.54	-0.00218077	-0.0022138	-0.00231129	-0.00254327	-0.00290464	-0.00344414	-0.00410409	-0.00485272	-0.00559869	-0.00629609	-0.00692132	-0.00750547		-69.9875	-66.3599	-63.6079	-61.7942	-59.5425	-58.5105	-57.9789	-58.2291	-58.8858	-59.2298	-59.5738	-60.3869
13.56	-0.00218148	-0.0022132	-0.00231658	-0.00254705	-0.0029181	-0.00345513	-0.0041219	-0.00487355	-0.00561347	-0.00630707	-0.00693968	-0.00752183		-69.9875	-66.1723	-63.6392	-61.6377	-59.6676	-58.4167	-58.0415	-58.3542	-58.8858	-59.1673	-59.6677	-60.4807
13.58	-0.00218219	-0.0022143	-0.00232074	-0.00255288	-0.00292712	-0.00346802	-0.00413655	-0.00488567	-0.00562549	-0.00632292	-0.00694744	-0.00752676		-69.9875	-66.0785	-63.6079	-61.5752	-59.6051	-58.3855	-58.0102	-58.2604	-58.8233	-59.1985	-59.5738	-60.3869
13.6	-0.00218341	-0.00221651	-0.00232326	-0.00256003	-0.0029391	-0.00348353	-0.00415637	-0.00490407	-0.00563908	-0.00634182	-0.00697444	-0.00754501		-70.0188	-66.0472	-63.4829	-61.5753	-59.6677	-58.448	-58.1353	-58.323	-58.7921	-59.2923	-59.824	-60.512
13.62	-0.00218411	-0.00221717	-0.00232812	-0.00256409	-0.00294813	-0.00349979	-0.00417081	-0.00492111	-0.00564858	-0.00635731	-0.00698344	-0.00755729		-70.0188	-65.9221	-63.4829	-61.4189	-59.6051	-58.5418	-58.104	-58.3542	-58.667	-59.3236	-59.7615	-60.5432
13.64	-0.0021848	-0.00221949	-0.00233131	-0.00256897	-0.00296015	-0.00351416	-0.00419149	-0.00493687	-0.00566543	-0.00637115	-0.00700301	-0.00756202		-70.0188	-65.8908	-63.3891	-61.2938	-59.6676	-58.5731	-58.2604	-58.3542	-58.6982	-59.3237	-59.8865	-60.4495
13.66	-0.0021855	-0.00222184	-0.00233627	-0.00257712	-0.00296777	-0.00352334	-0.00420667	-0.00495022	-0.005678	-0.00638342	-0.00701182	-0.00757261		-70.0188	-65.8596	-63.389	-61.325	-59.5426	-58.4168	-58.2604	-58.2916	-58.6356	-59.2924	-59.824	-60.4495
13.68	-0.00218568	-0.0022242	-0.00233786	-0.00258337	-0.00297633	-0.00353804	-0.00422083	-0.00497107	-0.00569919	-0.00639577	-0.00702602	-0.00758132		-69.9875	-65.8283	-63.2014	-61.2625	-59.4487	-58.448	-58.2291	-58.4168	-58.7607	-59.2611	-59.8552	-60.4181
13.7	-0.00218639	-0.00222712	-0.00234301	-0.00258909	-0.00298652	-0.00354924	-0.00423199	-0.00498793	-0.00571581	-0.00641456	-0.00703491	-0.00758825		-69.9875	-65.8283	-63.2014	-61.1687	-59.4175	-58.3542	-58.104	-58.448	-58.792	-59.3549	-59.7927	-60.3556
13.72	-0.00218761	-0.00222897	-0.00234816	-0.00259618	-0.0029975	-0.00356587	-0.00425075	-0.00500226	-0.00572952	-0.00642991	-0.0070527	-0.00760099		-70.0188	-65.7658	-63.2015	-61.1375	-59.4174	-58.4481	-58.1979	-58.4167	-58.7608	-59.3862	-59.8865	-60.3869
13.74	-0.00218727	-0.00223246	-0.00235105	-0.00260018	-0.00300485	-0.00357883	-0.00426513	-0.00501916	-0.00574475	-0.0064404	-0.0070545	-0.00760988		-69.9563	-65.797	-63.0764	-60.9499	-59.2611	-58.4168	-58.1667	-58.4481	-58.7608	-59.3237	-59.6989	-60.3557
13.76	-0.00218902	-0.00223487	-0.00235633	-0.00260884	-0.00301542	-0.00359362	-0.00428274	-0.00503351	-0.00576566	-0.00645427	-0.00707084	-0.00762451		-70.0188	-65.7658	-63.0763	-60.981	-59.2298	-58.448	-58.2291	-58.4168	-58.8858	-59.3237	-59.7615	-60.4182
13.78	-0.00218971	-0.00223676	-0.00236162	-0.00261431	-0.00302532	-0.00360838	-0.00429601	-0.00505045	-0.00578054	-0.00647612	-0.00708699	-0.00764274		-70.0188	-65.7032	-63.0763	-60.856	-59.1673	-58.4793	-58.1666	-58.4481	-58.8858	-59.48	-59.824	-60.5432
13.8	-0.00219092	-0.0022387	-0.00236861	-0.00262186	-0.00303756	-0.0036222	-0.00431052	-0.00506606	-0.00579257	-0.00649434	-0.00710649	-0.00764927		-70.0501	-65.6407	-63.1702	-60.8248	-59.1986	-58.4793	-58.1353	-58.4481	-58.8233	-59.5738	-59.9492	-60.4807
13.82	-0.00219057	-0.00224015	-0.00237096	-0.00262755	-0.00304386	-0.00363339	-0.00432195	-0.0050792	-0.00581195	-0.00649783	-0.00710978	-0.00765975		-69.9875	-65.5469	-63.0138	-60.6996	-58.9796	-58.3855	-58.0102	-58.3855	-58.9171	-59.3861	-59.7927	-60.4807
13.84	-0.00219076	-0.00224166	-0.00237232	-0.00263406	-0.00305649	-0.00364481	-0.00433798	-0.00509628	-0.00582389	-0.00651475	-0.00712587	-0.00767404		-69.9563	-65.453	-62.7949	-60.6058	-59.0109	-58.2917	-58.0103	-58.4168	-58.8546	-59.4488	-59.8553	-60.5433
13.86	-0.00219251	-0.00224217	-0.00237905	-0.00264327	-0.00306761	-0.00366269	-0.00435402	-0.00511329	-0.00584753	-0.0065331	-0.0071453	-0.00768814		-70.0188	-65.2967	-62.8574	-60.6371	-58.9797	-58.4168	-58.0102	-58.4481	-59.0422	-59.5426	-59.9803	-60.6058
13.88	-0.00219371	-0.00224386	-0.002384	-0.0026518	-0.00308178	-0.00367853	-0.00437543	-0.00513022	-0.00586055	-0.00654472	-0.00715908	-0.00769827		-70.0501	-65.2029	-62.8262	-60.6372	-59.0735	-58.4794	-58.1666	-58.4794	-59.011	-59.5113	-60.0116	-60.6059
13.9	-0.00219285	-0.00224509	-0.00238784	-0.0026552	-0.00308905	-0.00368976	-0.00438895	-0.00514329	-0.00586642	-0.00656128	-0.00715858	-0.00770458		-69.9563	-65.0778	-62.7324	-60.387	-58.8859	-58.3856	-58.1041	-58.4168	-58.8233	-59.5738	-59.7928	-60.5434
13.92	-0.00219511	-0.00224909	-0.0023935	-0.00266733	-0.00310271	-0.00370393	-0.00441127	-0.00516417	-0.0058888	-0.00657769	-0.00717114	-0.00771869		-70.0501	-65.109	-62.7324	-60.5433	-58.9484	-58.3855	-58.2917	-58.5419	-58.9796	-59.6364	-59.7928	-60.6059
13.94	-0.00219424	-0.00225361	-0.00239398	-0.00267345	-0.00310948	-0.00371358	-0.00442123	-0.00517325	-0.00590056	-0.00658251	-0.00718015	-0.00772307		-69.9563	-65.1716	-62.4509	-60.4183	-58.7295	-58.2291	-58.1353	-58.3855	-58.9171	-59.48	-59.7303	-60.5121
13.96	-0.00219547	-0.00225593	-0.00239937	-0.00268428	-0.00312349	-0.00372998	-0.00443812	-0.00518916	-0.00591542	-0.00660084	-0.00719289	-0.00772962		-69.9875	-65.109	-62.4196	-60.5119	-58.792	-58.2916	-58.1665	-58.3855	-58.9171	-59.5738	-59.7302	-60.4495
13.98	-0.0021972	-0.00225938	-0.00240654	-0.00269304	-0.00313741	-0.00374899	-0.00445387	-0.0052115	-0.00593175	-0.00661236	-0.007211	-0.00774785		-70.0501	-65.109	-62.4822	-60.512	-58.8546	-58.4481	-58.1666	-58.5419	-58.9484	-59.5426	-59.824	-60.5746
14	-0.00219685	-0.00226012	-0.00241307	-0.00270312	-0.0031497	-0.00376126	-0.0044751	-0.0052257	-0.00594066	-0.00662397	-0.00721631	-0.00775996		-69.9875	-64.9527	-62.5134	-60.5745	-58.8546	-58.3855	-58.3229	-58.5105	-58.8233	-59.5113	-59.6989	-60.6058
14.02	-0.00219703	-0.00226369	-0.0024155	-0.00270919	-0.00315971	-0.00377461	-0.00448498	-0.00523743	-0.00595436	-0.00663404	-0.00722737	-0.00776622		-69.9563	-64.9527	-62.3258	-60.4495	-58.7608	-58.3543	-58.1667	-58.4168	-58.7921	-59.4488	-59.6677	-60.5433
14.04	-0.00219981	-0.00226672	-0.00242454	-0.00272005	-0.00317684	-0.00379174	-0.00449967	-0.00525977	-0.00597552	-0.00665579	-0.00725287	-0.00778613		-70.0813	-64.9214	-62.4821	-60.5433	-58.9483	-58.448	-58.1353	-58.5731	-58.9171	-59.605	-59.8865	-60.6996
14.06	-0.00219892	-0.00226977	-0.00242699	-0.00272617	-0.00318591	-0.00380405	-0.00451779	-0.00527262	-0.0059845	-0.00665734	-0.00725795	-0.0077921		-69.9875	-64.8901	-62.2945	-60.4181	-58.8233	-58.3855	-58.1978	-58.5105	-58.792	-59.3862	-59.7614	-60.637
14.08	-0.00219962	-0.00227284	-0.00243199	-0.00273314	-0.00319989	-0.00381466	-0.00453355	-0.00528825	-0.00600126	-0.00667767	-0.00727061	-0.00780983		-69.9875	-64.8589	-62.232	-60.3243	-58.8858	-58.2604	-58.1978	-58.5105	-58.8232	-59.5113	-59.7614	-60.7621
14.1	-0.00220032	-0.00227431	-0.00243765	-0.00274093	-0.0032091	-0.00383118	-0.00454709	-0.0053039	-0.00602389	-0.00668937	-0.00728868	-0.00781562		-69.9875	-64.7338	-62.2007	-60.2618	-58.7607	-58.3229	-58.1353	-58.5106	-58.9796	-59.48	-59.8553	-60.6996
14.12	-0.00220205	-0.0022786	-0.00244159	-0.00275214	-0.00322405	-0.00384758	-0.00456754	-0.00532087	-0.0060431	-0.0067078	-0.00730105	-0.00783126		-70.0501	-64.7651	-62.0756	-60.3556	-58.8546	-58.3855	-58.2605	-58.5419	-59.0735	-59.5739	-59.8553	-60.7935
14.14	-0.00220221	-0.00228123	-0.00244921	-0.00275922	-0.00323569	-0.00385915	-0.00457981	-0.00533514	-0.00605607	-0.00671931	-0.00731523	-0.00783887		-70.0188	-64.7025	-62.1382	-60.2618	-58.8233	-58.2917	-58.1666	-58.5105	-59.0422	-59.5426	-59.8865	-60.7622
14.16	-0.00220135	-0.00228281	-0.00245262	-0.00276378	-0.00324583	-0.00387095	-0.0045946	-0.00535214	-0.00606913	-0.00672592	-0.0073257	-0.00784851		-69.925	-64.5774	-61.9818	-60.043	-58.7295	-58.1978	-58.1353	-58.5418	-59.0109	-59.4175	-59.8553	-60.7622
14.18	-0.00220362	-0.00228669	-0.00246333	-0.00277539	-0.00326013	-0.00388774	-0.00460949	-0.00536775	-0.0060838	-0.00674957	-0.00734897	-0.00786398		-70.0188	-64.5774	-62.2007	-60.1368	-58.792	-58.2604	-58.1041	-58.5418	-59.011	-59.6051	-60.0429	-60.856
14.2	-0.00220482	-0.00229002	-0.00246845	-0.00278417	-0.00327354	-0.00390155	-0.00462449	-0.00538867	-0.00609997	-0.00676099	-0.00736625	-0.00786556		-70.0501	-64.5461	-62.1382	-60.1055	-58.8233	-58.2292	-58.0728	-58.6669	-59.0422	-59.5739	-60.1367	-60.7309
14.22	-0.00220498	-0.00229063	-0.00247305	-0.00279437	-0.00328371	-0.00391735	-0.004643	-0.00540261	-0.00611606	-0.0067725	-0.00737961	-0.00787333		-70.0188	-64.3585	-62.0444	-60.1367	-58.7295	-58.2604	-58.1353	-58.6356	-59.0735	-59.5426	-60.168	-60.6996
14.24	-0.00220411	-0.00229524	-0.00247716	-0.00280046	-0.00329649	-0.00392928	-0.00465337	-0.00541531	-0.006123	-0.00678746	-0.00738374	-0.00787729		-69.925	-64.3898	-61.9192	-59.9804	-58.7295	-58.1666	-57.979	-58.5731	-58.9172	-59.5739	-60.043	-60.6058
14.26	-0.00220535	-0.00229872	-0.00248261	-0.00280885	-0.00330768	-0.00394626	-0.0046722	-0.00543623	-0.00613948	-0.00680065	-0.00740287	-0.00788931		-69.9563	-64.3585	-61.8567	-59.9178	-58.6669	-58.2291	-58.0416	-58.6982	-58.9485	-59.5739	-60.1681	-60.6371
14.28	-0.00220658	-0.00230279	-0.00249054	-0.00281462	-0.00332466	-0.00395925	-0.00468743	-0.00545144	-0.00615588	-0.00681551	-0.00741796	-0.00789539		-69.9875	-64.3585	-61.9192	-59.7302	-58.8233	-58.1666	-58.0102	-58.6982	-58.9796	-59.605	-60.2305	-60.5746
14.3	-0.00220675	-0.00230464	-0.0024948	-0.00282754	-0.00333244	-0.00397337	-0.00470623	-0.00545995	-0.00616915	-0.00682186	-0.00742371	-0.00790554		-69.9563	-64.2334	-61.7942	-59.8553	-58.6357	-58.1353	-58.0728	-58.5419	-58.9484	-59.48	-60.1368	-60.5746
14.32	-0.00220694	-0.00230771	-0.00249982	-0.00283616	-0.00334631	-0.0039876	-0.00471794	-0.00547699	-0.00618252	-0.00683365	-0.00743339	-0.00792157		-69.925	-64.1709	-61.7003	-59.7928	-58.667	-58.1041	-57.9477	-58.5732	-58.9171	-59.4488	-60.1055	-60.6684
14.34	-0.00220818	-0.00231249	-0.00250314	-0.00284626	-0.0033585	-0.0040029	-0.00473697	-0.00549666	-0.00620212	-0.0068523	-0.00744685	-0.00793342		-69.9563	-64.2021	-61.5127	-59.7928	-58.6357	-58.1041	-58.0103	-58.667	-59.0109	-59.5426	-60.1368	-60.6997
14.36	-0.00221045	-0.00231392	-0.00251153	-0.00285707	-0.00336996	-0.00402214	-0.00475469	-0.00551472	-0.00621991	-0.00686899	-0.00746576	-0.0079491		-70.0501	-64.0458	-61.5753	-59.824	-58.5732	-58.2291	-58.0415	-58.7295	-59.0735	-59.6051	-60.2619	-60.7935
14.38	-0.0022106	-0.00231771	-0.00251803	-0.00286577	-0.00338485	-0.00403323	-0.00477468	-0.00553398	-0.00622983	-0.00688039	-0.0074769	-0.00795862		-70.0188	-64.0145	-61.544	-59.7615	-58.6357	-58.104	-58.1353	-58.8233	-58.9797	-59.5738	-60.2618	-60.7935
14.4	-0.0022118	-0.00232208	-0.00252701	-0.00287597	-0.00339881	-0.00404761	-0.00479797	-0.00555164	-0.00625083	-0.00689189	-0.00749733	-0.00796616		-70.0501	-64.0145	-61.6378	-59.7615	-58.667	-58.0728	-58.323	-58.8859	-59.1048	-59.5426	-60.4182	-60.7622
14.42	-0.00221247	-0.00232478	-0.00253161	-0.00288339	-0.00341107	-0.00406109	-0.00480779	-0.00556775	-0.00626839	-0.00691202	-0.00750989	-0.00797576		-70.0501	-63.9207	-61.5127	-59.6365	-58.6357	-58.0102	-58.1666	-58.9171	-59.1674	-59.6677	-60.4495	-60.7622
14.44	-0.00221158	-0.00232923	-0.00253759	-0.00289453	-0.00342175	-0.00407974	-0.00482397	-0.00557418	-0.00627646	-0.00692152	-0.00750748	-0.00798536		-69.9563	-63.9207	-61.4502	-59.6677	-58.5419	-58.1041	-58.1666	-58.7296	-59.0423	-59.6052	-60.2306	-60.7622
14.46	-0.0022128	-0.00233201	-0.0025455	-0.00290283	-0.00343515	-0.00409617	-0.00484136	-0.0055949	-0.00630044	-0.00693291	-0.00752244	-0.00799099		-69.9875	-63.8269	-61.4814	-59.5738	-58.5418	-58.1353	-58.1978	-58.8545	-59.2298	-59.5738	-60.2931	-60.6996
14.48	-0.00221349	-0.002336	-0.00255461	-0.0029127	-0.00344773	-0.00411154	-0.00486106	-0.00560562	-0.00631298	-0.00694783	-0.00753536	-0.00800671		-69.9875	-63.7956	-61.5753	-59.5425	-58.5106	-58.1352	-58.2917	-58.7607	-59.1986	-59.6051	-60.3244	-60.7935
14.5	-0.00221367	-0.00234001	-0.00256176	-0.00292406	-0.00346124	-0.00412291	-0.00487814	-0.00562216	-0.00632718	-0.00695922	-0.00754632	-0.00801224		-69.9563	-63.7643	-61.5753	-59.5739	-58.5106	-58.0103	-58.323	-58.7921	-59.1986	-59.5738	-60.3244	-60.731
14.52	-0.00221437	-0.00234237	-0.00257015	-0.00293254	-0.00347393	-0.00414067	-0.00489035	-0.00563445	-0.00633825	-0.00697071	-0.00755727	-0.00802191		-69.9563	-63.6392	-61.6378	-59.4801	-58.4794	-58.0728	-58.2292	-58.7295	-59.1361	-59.5426	-60.3244	-60.731
14.54	-0.00221611	-0.0023471	-0.00258097	-0.00294546	-0.00348924	-0.00415424	-0.00490764	-0.00565806	-0.00635892	-0.00698747	-0.00757385	-0.00803754		-70.0188	-63.6392	-61.8255	-59.5738	-58.5418	-58.0102	-58.2604	-58.9171	-59.2611	-59.6051	-60.4182	-60.8247
14.56	-0.00221575	-0.00235126	-0.00258345	-0.00295753	-0.00349849	-0.00417003	-0.00492608	-0.00566999	-0.00636665	-0.00700233	-0.00758641	-0.00804097		-69.9563	-63.608	-61.6065	-59.6364	-58.3855	-58.0103	-58.323	-58.8546	-59.1361	-59.6365	-60.4495	-60.731
14.58	-0.00221593	-0.00235489	-0.00258871	-0.00296592	-0.00351065	-0.00418379	-0.00493708	-0.0056807	-0.00638105	-0.0070084	-0.00758949	-0.00805262		-69.925	-63.5454	-61.5127	-59.5426	-58.323	-57.9477	-58.1979	-58.7608	-59.136	-59.5113	-60.3244	-60.7622
14.6	-0.00221821	-0.00235858	-0.00259723	-0.00297953	-0.00352811	-0.00420595	-0.00495818	-0.00569731	-0.00640337	-0.0070392	-0.00761173	-0.00807018		-70.0188	-63.4829	-61.5753	-59.6677	-58.448	-58.1353	-58.323	-58.7921	-59.2923	-59.824	-60.512	-60.8873
14.62	-0.00221733	-0.00236176	-0.00259939	-0.00298643	-0.00354189	-0.00421735	-0.00497163	-0.00570257	-0.00641414	-0.00704295	-0.00761836	-0.00807739		-69.925	-63.3891	-61.3251	-59.5113	-58.448	-58.0102	-58.2604	-58.5732	-59.2298	-59.6677	-60.4494	-60.856
14.64	-0.00221908	-0.00236617	-0.00260565	-0.00300014	-0.00355828	-0.00424048	-0.00499016	-0.00572257	-0.00643146	-0.00706636	-0.00762706	-0.00808868		-69.9875	-63.3578	-61.2625	-59.6363	-58.5418	-58.2291	-58.3229	-58.6669	-59.2924	-59.8552	-60.4182	-60.8872
14.66	-0.00221925	-0.00237061	-0.00261326	-0.0030071	-0.00356668	-0.00425476	-0.00500239	-0.00573384	-0.00644223	-0.00707348	-0.00763585	-0.0080999		-69.9563	-63.3265	-61.2625	-59.4801	-58.3543	-58.1979	-58.2291	-58.5731	-59.2299	-59.7615	-60.387	-60.9186
14.68	-0.00222152	-0.00237451	-0.00262214	-0.00301873	-0.00358508	-0.00427332	-0.00502848	-0.00576099	-0.00646116	-0.0070949	-0.00765228	-0.00811704		-70.0501	-63.264	-61.3251	-59.5113	-58.5106	-58.2917	-58.4794	-58.8233	-59.3237	-59.9178	-60.4807	-61.0437
14.7	-0.00222166	-0.00237904	-0.00262715	-0.00302811	-0.0035953	-0.00428328	-0.00504398	-0.00577605	-0.00647823	-0.00710182	-0.00765708	-0.0081278		-70.0188	-63.2327	-61.2	-59.4488	-58.3855	-58.1353	-58.4793	-58.8233	-59.3862	-59.824	-60.3869	-61.0749
14.72	-0.00222181	-0.00238303	-0.00263295	-0.00303762	-0.0036102	-0.00429996	-0.00505577	-0.00578683	-0.00649031	-0.00711604	-0.00766594	-0.00812842		-69.9875	-63.1702	-61.1062	-59.3861	-58.4168	-58.1666	-58.3854	-58.7295	-59.3549	-59.8552	-60.3556	-60.9498
14.74	-0.0022225	-0.00238709	-0.00263825	-0.00304651	-0.00362505	-0.00431658	-0.00507532	-0.00580505	-0.00650409	-0.00712136	-0.00767869	-0.00814146		-69.9875	-63.1076	-60.9811	-59.2923	-58.448	-58.1979	-58.4793	-58.792	-59.3549	-59.7301	-60.3869	-61.0123
14.76	-0.00222371	-0.00239178	-0.00264628	-0.00305633	-0.00363897	-0.00433314	-0.00508837	-0.00582454	-0.00651627	-0.00713588	-0.00769135	-0.00815232		-70.0188	-63.0763	-60.981	-59.2298	-58.448	-58.2291	-58.4168	-58.8858	-59.3237	-59.7615	-60.4182	-61.0436
14.78	-0.00222491	-0.00239767	-0.0026524	-0.00306702	-0.0036547	-0.00434752	-0.00510663	-0.00584089	-0.00653984	-0.00715384	-0.00771154	-0.00816107		-70.0501	-63.1076	-60.8873	-59.1986	-58.5106	-58.1979	-58.4794	-58.9171	-59.5113	-59.8553	-60.5745	-61.0437
14.8	-0.00222348	-0.00240179	-0.00265672	-0.00307554	-0.00366405	-0.00435667	-0.00511592	-0.00584562	-0.00654993	-0.00716444	-0.00770838	-0.00816779		-69.925	-63.0451	-60.6997	-59.0735	-58.3542	-58.0102	-58.323	-58.6982	-59.4487	-59.8241	-60.3556	-61.0124
14.82	-0.00222523	-0.00240655	-0.00266517	-0.00308506	-0.00367915	-0.00437273	-0.00513448	-0.00587123	-0.0065602	-0.00717513	-0.00772686	-0.00818673		-69.9875	-63.0138	-60.6996	-58.9796	-58.3855	-58.0102	-58.3855	-58.9171	-59.3861	-59.7927	-60.4807	-61.1687
14.84	-0.00222644	-0.00240903	-0.00267299	-0.00309927	-0.00369239	-0.00439097	-0.00515416	-0.00588607	-0.00658041	-0.00719481	-0.007745	-0.00819309		-70.0188	-62.8574	-60.6683	-59.0734	-58.3542	-58.0728	-58.4793	-58.9171	-59.5113	-59.9178	-60.6058	-61.1375
14.86	-0.00222711	-0.00241457	-0.00268086	-0.00310881	-0.00370844	-0.00440475	-0.00516851	-0.00590675	-0.00659538	-0.00721056	-0.0077551	-0.00820359		-70.0188	-62.8574	-60.6371	-58.9797	-58.4168	-58.0102	-58.4481	-59.0422	-59.5426	-59.9803	-60.6058	-61.1688
14.88	-0.00222726	-0.00241837	-0.00268814	-0.00312156	-0.00372256	-0.00442413	-0.00518296	-0.00591686	-0.00660372	-0.00722077	-0.00776137	-0.00820384		-69.9875	-62.7636	-60.5746	-59.0109	-58.4168	-58.104	-58.4168	-58.9484	-59.4487	-59.949	-60.5433	-61.0436
14.9	-0.00222795	-0.00242402	-0.00269355	-0.00313124	-0.0037367	-0.00444112	-0.00520007	-0.00592725	-0.00662543	-0.00722571	-0.00777358	-0.0082085		-69.9875	-62.7636	-60.4182	-58.9171	-58.4168	-58.1353	-58.448	-58.8545	-59.605	-59.824	-60.5746	-60.9811
14.92	-0.00222863	-0.00242792	-0.00270377	-0.00314263	-0.00374812	-0.00446023	-0.00521711	-0.00594524	-0.00663686	-0.00723281	-0.00778184	-0.00821536		-69.9875	-62.6698	-60.4807	-58.8858	-58.3229	-58.2291	-58.4793	-58.917	-59.5738	-59.7302	-60.5433	-60.9498
14.94	-0.00222984	-0.00243075	-0.00271261	-0.00315257	-0.0037616	-0.00447473	-0.0052315	-0.00596306	-0.00664838	-0.00724915	-0.00779405	-0.00822842		-70.0188	-62.5134	-60.4808	-58.792	-58.2916	-58.1978	-58.448	-58.9796	-59.5425	-59.7928	-60.5746	-61.0124
14.96	-0.00223051	-0.00243551	-0.00272276	-0.00316578	-0.00377702	-0.00449043	-0.00524599	-0.0059763	-0.00666494	-0.00725991	-0.00779844	-0.00823518		-70.0188	-62.4509	-60.5432	-58.8233	-58.3229	-58.1978	-58.4168	-58.9484	-59.6051	-59.7615	-60.4808	-60.9811
14.98	-0.00223118	-0.00244151	-0.00273021	-0.00317818	-0.00379423	-0.00450395	-0.00526576	-0.00598962	-0.00667306	-0.00727436	-0.00781276	-0.0082461		-70.0188	-62.4509	-60.4807	-58.8233	-58.4168	-58.1353	-58.5106	-58.9171	-59.5113	-59.7927	-60.5433	-61.0124
15	-0.0022308	-0.00244811	-0.0027404	-0.0031906	-0.00380662	-0.0045254	-0.00528009	-0.00599861	-0.00668477	-0.00727971	-0.00782496	-0.00824877		-69.9563	-62.4822	-60.5433	-58.8234	-58.3543	-58.2917	-58.4793	-58.7921	-59.4801	-59.6677	-60.5746	-60.9186
15.02	-0.00223307	-0.0024529	-0.00274918	-0.00320381	-0.00382383	-0.0045398	-0.00529713	-0.00601835	-0.00670153	-0.00729808	-0.00783901	-0.008266		-70.0501	-62.4196	-60.5433	-58.8546	-58.4481	-58.2605	-58.5106	-58.8859	-59.5426	-59.7615	-60.6371	-61.0437
15.04	-0.00223268	-0.00245836	-0.00275597	-0.00321621	-0.00383522	-0.0045476	-0.00531147	-0.00603039	-0.00671313	-0.00731254	-0.00784706	-0.0082706		-69.9875	-62.3883	-60.4495	-58.8545	-58.3542	-58.0415	-58.4793	-58.8233	-59.5112	-59.7927	-60.6058	-60.9811
15.06	-0.00223441	-0.00246385	-0.00276558	-0.00322941	-0.0038525	-0.00457166	-0.00533116	-0.00604709	-0.00672317	-0.00732692	-0.00786298	-0.00827537		-70.0501	-62.3571	-60.4807	-58.8859	-58.4481	-58.2604	-58.5731	-58.8546	-59.4488	-59.824	-60.6996	-60.9186
15.08	-0.00223402	-0.00246761	-0.00277113	-0.00324177	-0.00386109	-0.00458506	-0.00534403	-0.00606071	-0.00674006	-0.00733574	-0.00787668	-0.00829057		-69.9875	-62.232	-60.3243	-58.8858	-58.2604	-58.1978	-58.5105	-58.8232	-59.5113	-59.7614	-60.7621	-61.0124
15.1	-0.00223365	-0.0024721	-0.0027776	-0.00324943	-0.00387581	-0.00459639	-0.00535709	-0.00608045	-0.00674842	-0.00735023	-0.00787851	-0.00829523		-69.925	-62.1382	-60.1993	-58.6982	-58.2604	-58.0728	-58.4481	-58.9171	-59.4175	-59.7928	-60.6371	-60.9498
15.12	-0.00223645	-0.00247729	-0.00279033	-0.00326618	-0.00389435	-0.00461938	-0.00537695	-0.00610293	-0.00677044	-0.00736643	-0.00789826	-0.00830829		-70.0501	-62.0756	-60.3556	-58.8546	-58.3855	-58.2605	-58.5419	-59.0735	-59.5739	-59.8553	-60.7935	-61.0124
15.14	-0.00223606	-0.00248435	-0.00279676	-0.00327707	-0.00390499	-0.00463054	-0.00538992	-0.00611439	-0.00678026	-0.0073788	-0.00790388	-0.00831911		-69.9875	-62.1069	-60.2305	-58.792	-58.2604	-58.1353	-58.4792	-59.0109	-59.5113	-59.8552	-60.7309	-61.0436
15.16	-0.00223779	-0.00249079	-0.00280474	-0.00329131	-0.00392169	-0.00465116	-0.00541373	-0.00613513	-0.00679532	-0.00739849	-0.00792339	-0.00833398		-70.0501	-62.1069	-60.1681	-58.8546	-58.3229	-58.2604	-58.6669	-59.136	-59.5426	-59.9804	-60.8873	-61.1375
15.18	-0.00223739	-0.00249843	-0.00281282	-0.00330143	-0.00393346	-0.00466004	-0.00542234	-0.00614187	-0.00681028	-0.00741232	-0.00792872	-0.00833206		-69.9875	-62.1694	-60.1055	-58.7607	-58.2291	-58.0728	-58.5105	-58.9797	-59.5738	-60.0116	-60.8247	-60.9811
15.2	-0.00223807	-0.00250299	-0.00282101	-0.00331417	-0.00394644	-0.00467403	-0.00544211	-0.00615665	-0.0068201	-0.00742789	-0.00792834	-0.0083471		-69.9875	-62.0756	-60.0429	-58.7607	-58.1666	-58.0102	-58.6043	-58.9796	-59.5113	-60.0741	-60.6683	-61.0749
15.22	-0.00223875	-0.00250827	-0.00283205	-0.00332531	-0.00396345	-0.00469395	-0.00545761	-0.0061745	-0.00683348	-0.00744328	-0.00793822	-0.00836809		-69.9875	-62.0131	-60.1054	-58.6982	-58.2291	-58.104	-58.6043	-59.0422	-59.5113	-60.1367	-60.6683	-61.2625
15.24	-0.0022389	-0.00251362	-0.00283957	-0.00333984	-0.00397742	-0.00470672	-0.00547312	-0.00618453	-0.00685195	-0.00745112	-0.00794613	-0.00837199		-69.9563	-61.9505	-60.0117	-58.7608	-58.1979	-58.0103	-58.6044	-58.9485	-59.6052	-60.0743	-60.6371	-61.2
15.26	-0.00224117	-0.00252027	-0.00284931	-0.00335264	-0.00399636	-0.00472787	-0.00549675	-0.00620403	-0.00686844	-0.00747392	-0.007962	-0.00838851		-70.0501	-61.9505	-60.0116	-58.7607	-58.3229	-58.1354	-58.792	-59.0423	-59.6677	-60.2619	-60.7309	-61.3251
15.28	-0.00224182	-0.00252753	-0.00285424	-0.00336873	-0.00400819	-0.00474172	-0.00551037	-0.00621865	-0.00688136	-0.00748692	-0.00796578	-0.00839015		-70.0501	-61.9818	-59.7928	-58.8859	-58.2292	-58.0728	-58.7608	-59.0422	-59.6676	-60.2931	-60.6372	-61.2313
15.3	-0.00224195	-0.0025317	-0.00286714	-0.00337638	-0.00402221	-0.00476043	-0.00551866	-0.00623175	-0.00688746	-0.00749241	-0.00797573	-0.00839204		-70.0188	-61.8567	-59.9178	-58.6982	-58.1978	-58.1353	-58.6044	-59.0109	-59.5425	-60.1993	-60.6371	-61.1375
15.32	-0.00224156	-0.00253603	-0.00287499	-0.00338937	-0.00403535	-0.0047708	-0.00553421	-0.0062434	-0.00689735	-0.00750003	-0.00798964	-0.0084025		-69.9563	-61.7316	-59.8241	-58.6983	-58.1354	-57.979	-58.6045	-58.9484	-59.4801	-60.1368	-60.6997	-61.1688
15.34	-0.00224383	-0.00254052	-0.00288649	-0.0034032	-0.00405261	-0.00479218	-0.00555661	-0.00626606	-0.00691938	-0.00751713	-0.00800535	-0.00841912		-70.0501	-61.6065	-59.8866	-58.7295	-58.1979	-58.1041	-58.7608	-59.1047	-59.6364	-60.2306	-60.7935	-61.2939
15.36	-0.00224395	-0.00254638	-0.0028944	-0.00341118	-0.00406776	-0.00480498	-0.00556898	-0.00627742	-0.00692897	-0.00752836	-0.00801286	-0.0084208		-70.0188	-61.544	-59.7927	-58.5419	-58.1978	-58.0102	-58.6982	-59.0422	-59.5738	-60.2306	-60.7622	-61.2
15.38	-0.00224461	-0.00255357	-0.00290389	-0.00342706	-0.00407994	-0.00482635	-0.00558979	-0.00628897	-0.00694217	-0.00754146	-0.00802443	-0.00842482		-70.0188	-61.544	-59.7615	-58.6357	-58.104	-58.1353	-58.8233	-58.9797	-59.5738	-60.2618	-60.7935	-61.1374
15.4	-0.0022437	-0.00256014	-0.00291132	-0.00343775	-0.00409038	-0.00484502	-0.00560199	-0.00630383	-0.00694678	-0.00755447	-0.00802399	-0.00842901		-69.925	-61.5127	-59.6364	-58.5419	-57.9477	-58.1979	-58.7608	-58.9797	-59.4175	-60.2931	-60.6371	-61.0749
15.42	-0.00224651	-0.00256737	-0.0029218	-0.00345369	-0.00410825	-0.00485996	-0.00562405	-0.00632806	-0.00697426	-0.00757489	-0.00804188	-0.00845636		-70.0501	-61.5127	-59.6365	-58.6357	-58.0102	-58.1666	-58.9171	-59.1674	-59.6677	-60.4495	-60.7622	-61.3564
15.44	-0.00224715	-0.00257523	-0.00293514	-0.00346693	-0.00413002	-0.00487979	-0.00563459	-0.00634079	-0.00698892	-0.00757798	-0.00805744	-0.00846621		-70.0501	-61.544	-59.7615	-58.6357	-58.1979	-58.2604	-58.8234	-59.1361	-59.699	-60.3244	-60.856	-61.3877
15.46	-0.0022478	-0.00258244	-0.00294258	-0.00347934	-0.00414528	-0.00489578	-0.00565375	-0.00636304	-0.00699829	-0.00759081	-0.00806075	-0.00848435		-70.0501	-61.544	-59.6364	-58.6044	-58.1979	-58.2604	-58.9171	-59.2924	-59.6364	-60.3557	-60.7622	-61.544
15.48	-0.00224739	-0.00259028	-0.00295096	-0.00349015	-0.00415852	-0.00491299	-0.00566148	-0.00637225	-0.00700957	-0.00759979	-0.00807232	-0.00848528		-69.9875	-61.5753	-59.5425	-58.5106	-58.1352	-58.2917	-58.7607	-59.1986	-59.6051	-60.3244	-60.7935	-61.4501
15.5	-0.00224807	-0.00259808	-0.0029631	-0.00350457	-0.00417092	-0.00493134	-0.00567947	-0.00638804	-0.00702269	-0.00761262	-0.00807979	-0.00849907		-69.9875	-61.6065	-59.6051	-58.5418	-58.0415	-58.3542	-58.8233	-59.2298	-59.605	-60.3556	-60.7622	-61.544
15.52	-0.00224821	-0.00260586	-0.00297083	-0.00351639	-0.00418767	-0.00494226	-0.00569027	-0.00639743	-0.00703233	-0.00762159	-0.00808736	-0.00851471		-69.9563	-61.6378	-59.4801	-58.4794	-58.0728	-58.2292	-58.7295	-59.1361	-59.5426	-60.3244	-60.731	-61.6691
15.54	-0.00224943	-0.00261613	-0.00298311	-0.00353093	-0.00420026	-0.0049584	-0.0057126	-0.00641659	-0.00704739	-0.00763632	-0.008101	-0.00853002		-69.9875	-61.7942	-59.5425	-58.5105	-57.9789	-58.2291	-58.8858	-59.2298	-59.5738	-60.3869	-60.7934	-61.7941
15.56	-0.00224957	-0.00261925	-0.00299603	-0.00354112	-0.00421723	-0.00497823	-0.00572604	-0.00642597	-0.00706411	-0.00765087	-0.00810646	-0.00852605		-69.9563	-61.6065	-59.6364	-58.3855	-58.0103	-58.323	-58.8546	-59.1361	-59.6365	-60.4495	-60.731	-61.6379
15.58	-0.00225131	-0.00262642	-0.00300663	-0.00355592	-0.00423414	-0.00499291	-0.00574098	-0.00644517	-0.00707538	-0.00765955	-0.00812414	-0.00854355		-70.0188	-61.6065	-59.6364	-58.4168	-58.0415	-58.2917	-58.8546	-59.2298	-59.6051	-60.4182	-60.856	-61.7942
15.6	-0.00225144	-0.00263232	-0.00301724	-0.00356981	-0.00425203	-0.00500893	-0.00575168	-0.0064609	-0.00709903	-0.00767401	-0.00813342	-0.00853532		-69.9875	-61.544	-59.6364	-58.4167	-58.104	-58.2917	-58.7608	-59.261	-59.7927	-60.4807	-60.856	-61.5752
15.62	-0.00225264	-0.00263703	-0.00302713	-0.00358721	-0.0042677	-0.00502743	-0.00576266	-0.00647816	-0.00710984	-0.00768829	-0.00814874	-0.00854034		-70.0188	-61.4189	-59.6051	-58.5418	-58.104	-58.3542	-58.667	-59.3236	-59.7615	-60.5432	-60.9498	-61.544
15.64	-0.00225383	-0.00264255	-0.00304003	-0.00360261	-0.00428968	-0.00504453	-0.00578104	-0.00649365	-0.0071313	-0.00769479	-0.00815774	-0.00855389		-70.0501	-61.3251	-59.6989	-58.6044	-58.2917	-58.3855	-58.7295	-59.355	-59.9178	-60.4808	-60.9498	-61.6379
15.66	-0.00225289	-0.00264883	-0.00304541	-0.00360911	-0.00430175	-0.00505411	-0.00578925	-0.006501	-0.00713466	-0.00769955	-0.00816473	-0.00856083		-69.9563	-61.2625	-59.4801	-58.3543	-58.1979	-58.2291	-58.5731	-59.2299	-59.7615	-60.387	-60.9186	-61.6378
15.68	-0.0022541	-0.00265648	-0.00305561	-0.00362587	-0.00431829	-0.00507786	-0.00581368	-0.00651677	-0.00715262	-0.00771219	-0.00817786	-0.00856142		-69.9875	-61.2625	-59.4487	-58.448	-58.2291	-58.4168	-58.7607	-59.2611	-59.8552	-60.4181	-60.9811	-61.544
15.7	-0.00225424	-0.00266157	-0.00306515	-0.00363625	-0.00432841	-0.00509359	-0.00582896	-0.00653408	-0.00715968	-0.00771712	-0.0081888	-0.0085665		-69.9563	-61.1375	-59.3863	-58.323	-58.0728	-58.4168	-58.7608	-59.3237	-59.7615	-60.3244	-61.0124	-61.5128
15.72	-0.00225386	-0.00266682	-0.00307406	-0.00365048	-0.00434427	-0.00510432	-0.00583849	-0.00654472	-0.00717233	-0.00772422	-0.00818747	-0.00856316		-69.8937	-61.0124	-59.2923	-58.323	-58.0728	-58.2916	-58.6357	-59.2611	-59.7614	-60.2618	-60.856	-61.3563
15.74	-0.00225616	-0.00267419	-0.0030854	-0.0036683	-0.00436442	-0.005128	-0.00586138	-0.00656367	-0.0071832	-0.007743	-0.00820687	-0.00857934		-69.9875	-60.9811	-59.2923	-58.448	-58.1979	-58.4793	-58.792	-59.3549	-59.7301	-60.3869	-61.0123	-61.4814
15.76	-0.0022563	-0.00268096	-0.00309375	-0.00368049	-0.00437891	-0.00513855	-0.00587805	-0.0065726	-0.00719418	-0.00775182	-0.00821365	-0.00857608		-69.9563	-60.9185	-59.1673	-58.3855	-58.1666	-58.3543	-58.8233	-59.2612	-59.699	-60.3557	-60.9811	-61.3251
15.78	-0.00225751	-0.00268718	-0.00310461	-0.00369644	-0.00439351	-0.00515705	-0.00589463	-0.00659646	-0.00721237	-0.00777225	-0.00822254	-0.0085881		-69.9875	-60.8247	-59.136	-58.448	-58.1353	-58.4168	-58.8545	-59.4487	-59.7927	-60.5119	-60.9811	-61.3876
15.8	-0.00225871	-0.00269483	-0.00311704	-0.00371047	-0.0044082	-0.00517286	-0.00590676	-0.00661489	-0.0072321	-0.00777877	-0.00823959	-0.00859995		-70.0188	-60.7935	-59.1673	-58.448	-58.104	-58.4168	-58.792	-59.5425	-59.9179	-60.4494	-61.1062	-61.4502
15.82	-0.0022583	-0.00270058	-0.00312338	-0.0037218	-0.00441975	-0.00518613	-0.00592638	-0.00661832	-0.00723532	-0.00778933	-0.00825016	-0.00860524		-69.9563	-60.6684	-58.9484	-58.3543	-57.979	-58.3543	-58.8859	-59.3549	-59.7615	-60.4495	-61.1375	-61.4189
15.84	-0.00225898	-0.00270782	-0.00313698	-0.00373426	-0.00443708	-0.00520471	-0.00593988	-0.00663706	-0.00725336	-0.00780567	-0.00825452	-0.00861062		-69.9563	-60.6058	-59.0109	-58.2917	-58.0103	-58.4168	-58.8546	-59.4488	-59.8553	-60.5433	-61.075	-61.3877
15.86	-0.00225966	-0.00271581	-0.00314667	-0.00375055	-0.00445107	-0.00521928	-0.00596083	-0.00665224	-0.00726933	-0.00781594	-0.00826519	-0.00861607		-69.9563	-60.5746	-58.9172	-58.3543	-57.9477	-58.3856	-58.9797	-59.4801	-59.9178	-60.5433	-61.1063	-61.3564
15.88	-0.00226087	-0.00272452	-0.00316115	-0.00376671	-0.00447291	-0.00523652	-0.00597406	-0.00666403	-0.00728331	-0.0078262	-0.0082696	-0.00862587		-69.9875	-60.5746	-59.0109	-58.4168	-58.104	-58.4168	-58.9484	-59.4487	-59.949	-60.5433	-61.0436	-61.3876
15.9	-0.00226207	-0.00273059	-0.00317162	-0.00378183	-0.00449107	-0.00525498	-0.00598591	-0.00668748	-0.00728999	-0.00784035	-0.00827626	-0.00863772		-70.0188	-60.4495	-58.9484	-58.4481	-58.1666	-58.4793	-58.8858	-59.6363	-59.8553	-60.6059	-61.0124	-61.4502
15.92	-0.00226272	-0.00274083	-0.003183	-0.00379321	-0.00451019	-0.00527199	-0.00600386	-0.00669881	-0.00729694	-0.00784849	-0.00828298	-0.00864726		-70.0188	-60.512	-58.9171	-58.3542	-58.2604	-58.5106	-58.9483	-59.6051	-59.7615	-60.5746	-60.9811	-61.4815
15.94	-0.00226284	-0.00274833	-0.00319136	-0.00380481	-0.00452244	-0.00528371	-0.00601868	-0.00670691	-0.0073096	-0.00785671	-0.00829185	-0.00865243		-69.9875	-60.4495	-58.7607	-58.2603	-58.1665	-58.4167	-58.9483	-59.5112	-59.7615	-60.5433	-60.9811	-61.4502
15.96	-0.00226298	-0.00275793	-0.00320393	-0.00381945	-0.00453718	-0.00529703	-0.00603054	-0.00672194	-0.00731863	-0.00785919	-0.0082966	-0.00866196		-69.9563	-60.4807	-58.7608	-58.2604	-58.1353	-58.3543	-58.8859	-59.5426	-59.699	-60.4183	-60.9186	-61.4815
15.98	-0.00226525	-0.0027675	-0.00321886	-0.00383972	-0.00455424	-0.005321	-0.00604854	-0.00673521	-0.00733874	-0.00787955	-0.00831386	-0.00867785		-70.0501	-60.512	-58.8546	-58.4481	-58.1666	-58.5419	-58.9484	-59.5426	-59.824	-60.5746	-61.0437	-61.6066
16	-0.00226429	-0.00277703	-0.0032305	-0.00385114	-0.00457461	-0.00533395	-0.00605591	-0.00674515	-0.00734211	-0.00788971	-0.0083143	-0.00868051		-69.9563	-60.5433	-58.8234	-58.3543	-58.2917	-58.4793	-58.7921	-59.4801	-59.6677	-60.5746	-60.9186	-61.544
16.02	-0.0022655	-0.0027845	-0.00324221	-0.00386655	-0.0045868	-0.00534841	-0.00607272	-0.00675861	-0.00735687	-0.00789986	-0.00832745	-0.00868763		-69.9875	-60.4807	-58.792	-58.3855	-58.1979	-58.448	-58.8233	-59.48	-59.6989	-60.5745	-60.9811	-61.544
16.04	-0.00226617	-0.00279276	-0.00325637	-0.00388002	-0.004597	-0.00536562	-0.00608796	-0.00677374	-0.0073752	-0.00791198	-0.00833629	-0.00869045		-69.9875	-60.4495	-58.8545	-58.3542	-58.0415	-58.4793	-58.8233	-59.5112	-59.7927	-60.6058	-60.9811	-61.4814
16.06	-0.0022663	-0.00280039	-0.00326726	-0.00389454	-0.00461782	-0.00538142	-0.00610019	-0.00677874	-0.0073841	-0.00792204	-0.00833481	-0.00870204		-69.9563	-60.3869	-58.7921	-58.3543	-58.1666	-58.4793	-58.7608	-59.355	-59.7302	-60.6058	-60.8248	-61.544
16.08	-0.00226804	-0.0028088	-0.00328307	-0.00390717	-0.00463605	-0.00539989	-0.00612016	-0.00680267	-0.00740052	-0.00794389	-0.00835857	-0.00871346		-70.0188	-60.3556	-58.9171	-58.2917	-58.2291	-58.5418	-58.8545	-59.5426	-59.7927	-60.7934	-61.0437	-61.6066
16.1	-0.00226869	-0.00281659	-0.00329225	-0.00392379	-0.00464958	-0.00541554	-0.0061429	-0.00681427	-0.00741859	-0.00794947	-0.00836722	-0.00871609		-70.0188	-60.2931	-58.792	-58.3542	-58.1666	-58.5419	-59.0109	-59.5113	-59.8866	-60.7309	-61.0436	-61.544
16.12	-0.00226827	-0.00282516	-0.00330411	-0.00393644	-0.00466559	-0.00542719	-0.00615608	-0.00682596	-0.0074235	-0.0079572	-0.00836759	-0.00871888		-69.9563	-60.2618	-58.7608	-58.2917	-58.1667	-58.4481	-58.9797	-59.4801	-59.7615	-60.6997	-60.9186	-61.4815
16.14	-0.00227054	-0.00283517	-0.00331927	-0.00395216	-0.00468275	-0.00544715	-0.00617544	-0.00684451	-0.00744537	-0.0079729	-0.00838905	-0.00873479		-70.0501	-60.2931	-58.8546	-58.323	-58.1979	-58.5418	-59.0735	-59.5739	-59.9178	-60.7935	-61.1062	-61.6066
16.16	-0.00227171	-0.00284239	-0.00333265	-0.00396781	-0.00470215	-0.00546956	-0.00619454	-0.0068577	-0.00746309	-0.0079903	-0.00840167	-0.00874387		-70.0813	-60.1993	-58.8858	-58.3541	-58.2916	-58.6981	-59.1672	-59.5738	-60.0116	-60.9185	-61.1687	-61.6378
16.18	-0.00227233	-0.00285183	-0.00334436	-0.00398148	-0.00471324	-0.00548075	-0.0062042	-0.006876	-0.00748053	-0.00799946	-0.00840372	-0.0087507		-70.0813	-60.1993	-58.8545	-58.3229	-58.1666	-58.6043	-59.0735	-59.6676	-60.1054	-60.9185	-61.0749	-61.6377
16.2	-0.00227242	-0.00285921	-0.00335615	-0.00399329	-0.00472583	-0.00549898	-0.0062172	-0.00688381	-0.007494	-0.00799673	-0.00841643	-0.00875538		-70.0501	-60.1055	-58.8233	-58.2292	-58.0728	-58.6669	-59.0422	-59.5739	-60.1367	-60.7309	-61.1375	-61.6066
16.22	-0.00227252	-0.00286951	-0.00336638	-0.00400926	-0.00474452	-0.00551298	-0.00623337	-0.00689531	-0.00750737	-0.00800442	-0.00843523	-0.00876012		-70.0188	-60.1367	-58.7295	-58.2604	-58.1353	-58.6356	-59.0735	-59.5426	-60.168	-60.6996	-61.2938	-61.5752
16.24	-0.00227264	-0.002877	-0.00338093	-0.0040232	-0.00475721	-0.00552843	-0.00624329	-0.00691373	-0.00751508	-0.0080122	-0.00843898	-0.00876928		-69.9875	-60.0429	-58.792	-58.2291	-58.0415	-58.6356	-58.9797	-59.6364	-60.1055	-60.6683	-61.2312	-61.6065
16.26	-0.00227276	-0.00288395	-0.00339042	-0.00403823	-0.0047737	-0.00554663	-0.00625658	-0.00692332	-0.00753041	-0.00802007	-0.00844708	-0.00877402		-69.9563	-59.9178	-58.6669	-58.2291	-58.0416	-58.6982	-58.9485	-59.5739	-60.1681	-60.6371	-61.2313	-61.5753
16.28	-0.0022761	-0.00289251	-0.00341095	-0.00405527	-0.00479373	-0.0055674	-0.00627926	-0.0069451	-0.00755303	-0.00803399	-0.00845936	-0.00878753		-70.1126	-59.8553	-58.9484	-58.2917	-58.1353	-58.8233	-59.1047	-59.7301	-60.3556	-60.6997	-61.2938	-61.6691
16.3	-0.00227564	-0.00290469	-0.00341764	-0.00406819	-0.00481116	-0.0055741	-0.00629062	-0.00694924	-0.00755642	-0.00804175	-0.00845891	-0.00879425		-70.0501	-59.9491	-58.7295	-58.2291	-58.1666	-58.6357	-59.0422	-59.5738	-60.2306	-60.6684	-61.1688	-61.6691
16.32	-0.00227574	-0.00291321	-0.00343145	-0.00408229	-0.00482261	-0.00559097	-0.00630372	-0.00696073	-0.00756578	-0.00805757	-0.00847136	-0.00879881		-70.0188	-59.8866	-58.7608	-58.1979	-58.0415	-58.667	-59.0109	-59.5426	-60.1993	-60.7622	-61.2313	-61.6379
16.34	-0.00227585	-0.00292185	-0.00344187	-0.00409548	-0.00483917	-0.00560777	-0.00632004	-0.00697576	-0.00757522	-0.00806514	-0.00847944	-0.00880996		-69.9875	-59.824	-58.6669	-58.1353	-58.0415	-58.6982	-59.0421	-59.5738	-60.168	-60.7309	-61.2313	-61.7003
16.36	-0.00227704	-0.00293131	-0.00345167	-0.00411286	-0.00485456	-0.0056231	-0.00633472	-0.00698897	-0.0075904	-0.0080768	-0.00848542	-0.00881877		-70.0188	-59.7927	-58.5419	-58.1978	-58.0102	-58.6982	-59.0422	-59.5738	-60.2306	-60.7622	-61.2	-61.7316
16.38	-0.00227769	-0.00294083	-0.00346764	-0.00412507	-0.00487604	-0.00564401	-0.00634627	-0.00700218	-0.0076035	-0.00808837	-0.00848937	-0.00881877		-70.0188	-59.7615	-58.6357	-58.104	-58.1353	-58.8233	-58.9797	-59.5738	-60.2618	-60.7935	-61.1374	-61.6378
16.4	-0.0022778	-0.0029497	-0.00348005	-0.00413753	-0.00489719	-0.005659	-0.00636429	-0.00701019	-0.00762029	-0.00809182	-0.00849771	-0.0088212		-69.9875	-59.6989	-58.6044	-58.0102	-58.2604	-58.8233	-59.0422	-59.48	-60.3556	-60.6996	-61.1374	-61.5752
16.42	-0.00228006	-0.00295941	-0.0034951	-0.00415431	-0.00491078	-0.00567958	-0.00638687	-0.00703587	-0.0076387	-0.00810757	-0.00852289	-0.00883689		-70.0813	-59.6677	-58.6669	-58.0414	-58.1978	-58.9483	-59.1986	-59.6989	-60.4807	-60.7934	-61.3876	-61.7003
16.44	-0.00227907	-0.00297062	-0.00350577	-0.00417307	-0.00492698	-0.00568582	-0.00639476	-0.00704522	-0.00763595	-0.00811703	-0.00852631	-0.00883695		-69.9875	-59.6989	-58.5731	-58.1353	-58.1978	-58.7608	-59.0735	-59.6364	-60.2618	-60.7934	-61.3251	-61.6065
16.46	-0.00228026	-0.00297891	-0.00351923	-0.00418958	-0.00494442	-0.00570664	-0.00641888	-0.0070565	-0.00765087	-0.00812247	-0.00854678	-0.00884163		-70.0188	-59.6051	-58.5731	-58.1666	-58.2291	-58.8858	-59.2611	-59.6051	-60.3244	-60.7309	-61.5127	-61.5753
16.48	-0.00228091	-0.00298881	-0.00353185	-0.00420499	-0.00496423	-0.00571725	-0.00643134	-0.00707138	-0.0076637	-0.00813815	-0.00855194	-0.00885734		-70.0188	-59.5738	-58.5419	-58.1665	-58.323	-58.792	-59.2299	-59.6364	-60.3557	-60.8248	-61.4814	-61.7004
16.5	-0.00228155	-0.00300096	-0.00354628	-0.00421734	-0.00498257	-0.00573521	-0.00644707	-0.0070844	-0.00767645	-0.0081455	-0.00856566	-0.00886394		-70.0188	-59.6364	-58.5731	-58.0728	-58.3855	-58.8546	-59.2611	-59.6363	-60.3869	-60.7935	-61.5753	-61.7004
16.52	-0.00228326	-0.00301084	-0.00356066	-0.00423719	-0.00499707	-0.00575016	-0.00646112	-0.00709919	-0.007691	-0.00815898	-0.00858761	-0.00887931		-70.0813	-59.6051	-58.6044	-58.1978	-58.3542	-58.8545	-59.2611	-59.6676	-60.4494	-60.856	-61.7941	-61.8254
16.54	-0.00228334	-0.00302151	-0.00357326	-0.0042474	-0.00501045	-0.00576939	-0.00647678	-0.00711037	-0.00770158	-0.00816825	-0.00859838	-0.00888118		-70.0501	-59.6051	-58.5731	-58.0415	-58.2917	-58.9484	-59.2924	-59.6364	-60.4495	-60.856	-61.8567	-61.7629
16.56	-0.00228236	-0.00303293	-0.00358158	-0.00426219	-0.00502772	-0.0057798	-0.00648273	-0.00712341	-0.00771214	-0.00816942	-0.00858987	-0.00887882		-69.9563	-59.6364	-58.3855	-58.0103	-58.323	-58.8546	-59.1361	-59.6365	-60.4495	-60.731	-61.6379	-61.6378
16.58	-0.00228356	-0.00304284	-0.00359558	-0.00427813	-0.00504119	-0.00579335	-0.00650038	-0.0071329	-0.00771888	-0.00818511	-0.0086053	-0.00888337		-69.9875	-59.6051	-58.3855	-58.0102	-58.2604	-58.8233	-59.1985	-59.5738	-60.3869	-60.8247	-61.7629	-61.6065
16.6	-0.00228422	-0.00305429	-0.00361048	-0.00429724	-0.00505859	-0.00580557	-0.00651786	-0.00715851	-0.00773537	-0.00819649	-0.00859912	-0.00889901		-69.9875	-59.6364	-58.4167	-58.104	-58.2917	-58.7608	-59.261	-59.7927	-60.4807	-60.856	-61.5752	-61.7316
16.62	-0.00228433	-0.00306274	-0.00362622	-0.00431086	-0.00507467	-0.00581367	-0.00653194	-0.00716576	-0.00774583	-0.00820777	-0.00859984	-0.00890331		-69.9563	-59.5426	-58.4793	-58.0415	-58.2917	-58.6045	-59.2611	-59.699	-60.4807	-60.8873	-61.4815	-61.7004
16.64	-0.002285	-0.00307509	-0.00364096	-0.00433208	-0.00509077	-0.00583086	-0.00654602	-0.00718571	-0.00775055	-0.00821489	-0.00861143	-0.00891429		-69.9563	-59.6051	-58.5106	-58.1979	-58.2917	-58.6357	-59.2612	-59.824	-60.387	-60.856	-61.5441	-61.7629
16.66	-0.0022862	-0.0030836	-0.0036512	-0.00434866	-0.00510562	-0.00584509	-0.00656009	-0.00719639	-0.0077632	-0.00823025	-0.00862711	-0.00892069		-69.9875	-59.5113	-58.3855	-58.2291	-58.2603	-58.6043	-59.2611	-59.7927	-60.4182	-60.9498	-61.669	-61.7629
16.68	-0.00228739	-0.00309379	-0.00366798	-0.0043652	-0.0051294	-0.00586955	-0.00657581	-0.00721431	-0.00777577	-0.0082433	-0.00862754	-0.00893371		-70.0188	-59.48	-58.4793	-58.2604	-58.4481	-58.792	-59.2924	-59.8865	-60.4494	-61.0124	-61.5753	-61.8567
16.7	-0.00228749	-0.0031033	-0.00367831	-0.00437524	-0.00514509	-0.00588476	-0.00659306	-0.00722122	-0.00778053	-0.00825413	-0.00863248	-0.00893323		-69.9875	-59.4175	-58.3542	-58.104	-58.448	-58.792	-59.3549	-59.7927	-60.3556	-61.0436	-61.544	-61.7629
16.72	-0.00228761	-0.00311293	-0.00369343	-0.00439215	-0.00515699	-0.00589563	-0.00660523	-0.00723557	-0.00778943	-0.00825466	-0.00863108	-0.00894183		-69.9563	-59.3549	-58.3856	-58.1354	-58.3542	-58.6983	-59.3237	-59.824	-60.3244	-60.9186	-61.4189	-61.7942
16.74	-0.00228827	-0.00312194	-0.0037085	-0.004409	-0.0051768	-0.00591406	-0.00661914	-0.00724087	-0.00780228	-0.0082678	-0.00864071	-0.00893928		-69.9563	-59.2611	-58.4168	-58.1667	-58.4481	-58.7608	-59.3237	-59.6989	-60.3557	-60.9811	-61.4502	-61.6691
16.76	-0.00229001	-0.00313264	-0.00372353	-0.00442687	-0.00519126	-0.00593525	-0.00663305	-0.00725731	-0.00781696	-0.00828077	-0.00864383	-0.0089592		-70.0188	-59.2298	-58.448	-58.2291	-58.4168	-58.8858	-59.3237	-59.7615	-60.4182	-61.0436	-61.3876	-61.8567
16.78	-0.00229064	-0.00314266	-0.0037385	-0.00444025	-0.00520838	-0.00595022	-0.00665518	-0.00727356	-0.00783534	-0.00828741	-0.00865354	-0.00896754		-70.0188	-59.1673	-58.4793	-58.1666	-58.4481	-58.8858	-59.48	-59.824	-60.5432	-61.0124	-61.4189	-61.888
16.8	-0.00229128	-0.00315434	-0.0037516	-0.00445382	-0.00522286	-0.00596079	-0.00667192	-0.00729145	-0.00783978	-0.00830235	-0.00866316	-0.00896915		-70.0188	-59.1673	-58.448	-58.104	-58.4168	-58.792	-59.5425	-59.9179	-60.4494	-61.1062	-61.4502	-61.8254
16.82	-0.00229246	-0.00316296	-0.00376571	-0.00446866	-0.00524001	-0.00598492	-0.00668023	-0.00730001	-0.00785615	-0.00831908	-0.00867483	-0.00898645		-70.0501	-59.0422	-58.4481	-58.0728	-58.4481	-58.9797	-59.4487	-59.8553	-60.5433	-61.2313	-61.5127	-61.9818
16.84	-0.00229147	-0.00317415	-0.00377523	-0.00448251	-0.00525451	-0.00599371	-0.00669378	-0.00731238	-0.00786641	-0.00831695	-0.00867346	-0.00897891		-69.9563	-59.0109	-58.2917	-58.0103	-58.4168	-58.8546	-59.4488	-59.8553	-60.5433	-61.075	-61.3877	-61.7942
16.86	-0.00229428	-0.00318695	-0.00379529	-0.00450094	-0.00527429	-0.00602068	-0.00671562	-0.00733563	-0.00788446	-0.00833584	-0.00868745	-0.00900297		-70.0813	-59.0422	-58.4793	-58.0727	-58.5106	-59.1047	-59.6051	-60.0428	-60.6683	-61.2313	-61.4814	-62.0443
16.88	-0.00229274	-0.00319739	-0.0038066	-0.00451703	-0.00528473	-0.00602612	-0.00671873	-0.00734018	-0.0078846	-0.00832955	-0.00868614	-0.00900191		-69.9563	-58.9797	-58.3856	-58.0728	-58.3856	-58.9172	-59.4175	-59.9178	-60.5121	-61.0124	-61.3564	-61.9506
16.9	-0.00229447	-0.00320874	-0.0038228	-0.00453646	-0.00530465	-0.00603954	-0.00674403	-0.00734872	-0.0079008	-0.0083383	-0.00870023	-0.0090189		-70.0188	-58.9484	-58.4481	-58.1666	-58.4793	-58.8858	-59.6363	-59.8553	-60.6059	-61.0124	-61.4502	-62.1069
16.92	-0.00229565	-0.00322095	-0.00383513	-0.00455679	-0.00532302	-0.00605905	-0.00675703	-0.00735745	-0.00791087	-0.00834705	-0.0087119	-0.00902212		-70.0501	-58.9484	-58.3855	-58.2917	-58.5419	-58.9796	-59.6364	-59.7928	-60.6059	-61.0124	-61.5128	-62.0757
16.94	-0.00229627	-0.00323004	-0.00384763	-0.00457009	-0.00533598	-0.0060753	-0.00676668	-0.00737184	-0.00792093	-0.00835787	-0.00871909	-0.00902764		-70.0501	-58.8233	-58.3229	-58.2291	-58.4793	-59.0109	-59.5738	-59.8241	-60.6059	-61.0437	-61.5128	-62.0757
16.96	-0.00229689	-0.00324333	-0.00386312	-0.00458582	-0.00535044	-0.00608847	-0.00678322	-0.00738247	-0.0079251	-0.00836446	-0.00873059	-0.00903762		-70.0501	-58.8546	-58.3542	-58.2291	-58.4481	-58.9797	-59.6364	-59.7928	-60.5121	-61.0124	-61.5753	-62.1382
16.98	-0.00229697	-0.00325499	-0.0038795	-0.00459819	-0.00536897	-0.00610022	-0.0067895	-0.00739502	-0.00793739	-0.0083732	-0.00873761	-0.00904297		-70.0188	-58.8233	-58.4168	-58.1353	-58.5106	-58.9171	-59.5113	-59.7927	-60.5433	-61.0124	-61.5753	-62.1382
17	-0.00229706	-0.00326832	-0.00389291	-0.00462101	-0.00538467	-0.00611065	-0.00680287	-0.00740208	-0.00795156	-0.00837778	-0.00874461	-0.00903715		-69.9875	-58.8546	-58.3855	-58.3229	-58.5105	-58.8233	-59.5113	-59.6989	-60.6058	-60.9498	-61.5752	-61.9818
17.02	-0.00229825	-0.00328002	-0.00390832	-0.00463313	-0.00539907	-0.00612742	-0.00681625	-0.00741677	-0.00796161	-0.00839085	-0.00875162	-0.00904737		-70.0188	-58.8233	-58.4168	-58.2292	-58.4793	-58.8546	-59.5113	-59.7302	-60.6058	-61.0124	-61.5753	-62.0444
17.04	-0.0022978	-0.0032926	-0.00391986	-0.00464097	-0.00541358	-0.00613956	-0.00682794	-0.00743136	-0.00796969	-0.00839543	-0.00874995	-0.00904624		-69.9563	-58.8233	-58.323	-58.0103	-58.4481	-58.7921	-59.48	-59.7615	-60.5746	-60.9499	-61.4502	-61.9505
17.06	-0.00230062	-0.0033076	-0.0039393	-0.00466768	-0.00543619	-0.00615948	-0.00684142	-0.00744954	-0.00798969	-0.00840432	-0.00877246	-0.0090543		-70.0813	-58.9171	-58.4793	-58.2916	-58.6043	-58.8858	-59.48	-59.8552	-60.7308	-60.9498	-61.669	-61.9817
17.08	-0.00230014	-0.00332002	-0.00394781	-0.00468106	-0.005449	-0.00617303	-0.00685829	-0.00745822	-0.00800334	-0.00841948	-0.00877487	-0.00905333		-70.0188	-58.9171	-58.2917	-58.2291	-58.5418	-58.8545	-59.5426	-59.7927	-60.7934	-61.0437	-61.6066	-61.888
17.1	-0.00230078	-0.00332922	-0.00396451	-0.00469462	-0.00546469	-0.00619587	-0.00686988	-0.00747633	-0.00800887	-0.0084281	-0.00877742	-0.00905931		-70.0188	-58.792	-58.3542	-58.1666	-58.5419	-59.0109	-59.5113	-59.8866	-60.7309	-61.0436	-61.544	-61.888
17.12	-0.00230249	-0.00334437	-0.00398108	-0.00471529	-0.00548173	-0.00621519	-0.00688838	-0.0074886	-0.0080245	-0.00843673	-0.00878883	-0.00907201		-70.0813	-58.8858	-58.4167	-58.2917	-58.5731	-59.1047	-59.6051	-59.8865	-60.8247	-61.0436	-61.6065	-61.9818
17.14	-0.00230201	-0.00335528	-0.00399169	-0.00472638	-0.00549464	-0.00622656	-0.00689807	-0.00750087	-0.00802993	-0.00844744	-0.00879356	-0.00906653		-70.0188	-58.8233	-58.2917	-58.1666	-58.5105	-59.0422	-59.5426	-59.8865	-60.7622	-61.0749	-61.5753	-61.8254
17.16	-0.00230156	-0.00336633	-0.00400456	-0.00474247	-0.00551317	-0.00624119	-0.00690624	-0.00751314	-0.0080415	-0.00845388	-0.00879618	-0.00907716		-69.9563	-58.7608	-58.2291	-58.1666	-58.5731	-59.0422	-59.4488	-59.8866	-60.7935	-61.0437	-61.5128	-61.888
17.18	-0.00230222	-0.00337835	-0.00401858	-0.00475391	-0.00552472	-0.00625121	-0.00692496	-0.007531	-0.00805099	-0.00845622	-0.00880331	-0.00908088		-69.9563	-58.7295	-58.1979	-58.0416	-58.4793	-58.9485	-59.5426	-59.9804	-60.7935	-60.9499	-61.5127	-61.8568
17.2	-0.00230287	-0.00339127	-0.00403172	-0.00476805	-0.00554475	-0.00626614	-0.00693483	-0.00754671	-0.0080505	-0.00847138	-0.00881046	-0.00908693		-69.9563	-58.7295	-58.1354	-57.979	-58.5731	-58.9484	-59.4801	-60.0429	-60.6371	-61.0437	-61.5128	-61.8568
17.22	-0.00230461	-0.00340421	-0.00405095	-0.0047906	-0.00556315	-0.00628729	-0.00695176	-0.00756599	-0.00806442	-0.00849679	-0.00882195	-0.00910196		-70.0188	-58.7295	-58.2604	-58.1353	-58.6356	-59.0735	-59.5426	-60.168	-60.6996	-61.2938	-61.5752	-61.9818
17.24	-0.0023047	-0.00341883	-0.00406494	-0.00480331	-0.00557864	-0.00629719	-0.00697024	-0.00757366	-0.00807216	-0.00850048	-0.00883109	-0.00911217		-69.9875	-58.792	-58.2291	-58.0415	-58.6356	-58.9797	-59.6364	-60.1055	-60.6683	-61.2312	-61.6065	-62.0444
17.26	-0.0023048	-0.00342835	-0.00408003	-0.00481986	-0.0055969	-0.00631049	-0.00697981	-0.00758902	-0.00808	-0.00850855	-0.00883578	-0.00911546		-69.9563	-58.6669	-58.2291	-58.0416	-58.6982	-58.9485	-59.5739	-60.1681	-60.6371	-61.2313	-61.5753	-62.0131
17.28	-0.00230491	-0.00344399	-0.00409114	-0.00483285	-0.00560946	-0.00632388	-0.00699128	-0.00760042	-0.00808191	-0.00850819	-0.00883617	-0.00911656		-69.925	-58.7608	-58.1041	-57.9477	-58.6357	-58.9171	-59.5425	-60.168	-60.5121	-61.1062	-61.4815	-61.9505
17.3	-0.0023072	-0.00345526	-0.0041096	-0.00485684	-0.0056236	-0.00634364	-0.00700459	-0.00761372	-0.00810021	-0.00851871	-0.00885431	-0.00914039		-70.0188	-58.6982	-58.1978	-58.1353	-58.6044	-59.0109	-59.5425	-60.1993	-60.6371	-61.1375	-61.6378	-62.2007
17.32	-0.00230729	-0.00346921	-0.00412382	-0.00486839	-0.00564062	-0.00635685	-0.00701616	-0.00762314	-0.00811615	-0.00853125	-0.0088589	-0.009141		-69.9875	-58.7295	-58.1666	-58.0102	-58.6357	-58.9796	-59.5113	-60.168	-60.7309	-61.2	-61.6066	-62.1382
17.34	-0.00230793	-0.00348057	-0.00413814	-0.00488629	-0.00565895	-0.00637488	-0.00703305	-0.00763455	-0.00812579	-0.00854151	-0.00887232	-0.00915305		-69.9875	-58.6669	-58.1353	-58.0415	-58.6982	-59.0421	-59.5738	-60.168	-60.7309	-61.2313	-61.7003	-62.232
17.36	-0.00231019	-0.00349208	-0.00415763	-0.00490413	-0.00567711	-0.00639273	-0.00704975	-0.00765353	-0.00814146	-0.00855167	-0.0088855	-0.00917166		-70.0813	-58.6044	-58.2603	-58.0727	-58.7607	-59.1047	-59.6363	-60.2931	-60.8247	-61.2625	-61.7941	-62.4196
17.38	-0.00230916	-0.00350545	-0.00416665	-0.0049219	-0.00569371	-0.00639934	-0.00705754	-0.00766076	-0.00814679	-0.00854903	-0.00887866	-0.00916942		-69.9875	-58.6044	-58.0727	-58.104	-58.792	-58.9484	-59.5425	-60.2305	-60.7622	-61.1061	-61.6065	-62.3258
17.4	-0.00231035	-0.00351969	-0.00418127	-0.00494567	-0.00571164	-0.00642068	-0.00706911	-0.00768148	-0.00815431	-0.00856167	-0.0088855	-0.00918327		-70.0188	-58.6357	-58.0415	-58.2917	-58.8546	-59.0735	-59.5113	-60.3869	-60.7309	-61.1687	-61.6065	-62.4509
17.42	-0.00231097	-0.00353217	-0.00419496	-0.00495555	-0.00572798	-0.00643848	-0.00708954	-0.00769414	-0.00816393	-0.0085805	-0.00889454	-0.00917868		-70.0188	-58.6044	-57.9789	-58.1353	-58.8858	-59.1361	-59.6364	-60.4182	-60.7309	-61.3251	-61.6378	-62.3258
17.44	-0.0023116	-0.0035456	-0.00421707	-0.00497565	-0.0057386	-0.00645131	-0.00710433	-0.00769717	-0.00817963	-0.00859039	-0.00890128	-0.00918573		-70.0188	-58.6044	-58.1666	-58.2291	-58.7921	-59.1048	-59.6677	-60.2931	-60.8247	-61.3564	-61.6378	-62.3571
17.46	-0.00231168	-0.00355731	-0.00423149	-0.0049906	-0.00575657	-0.00647223	-0.00711198	-0.00770819	-0.00818087	-0.00860658	-0.00890142	-0.00919496		-69.9875	-58.5418	-58.1353	-58.1978	-58.8545	-59.2298	-59.5738	-60.2931	-60.6996	-61.4814	-61.544	-62.4196
17.48	-0.00231232	-0.00357005	-0.00424705	-0.00501058	-0.00576727	-0.00648479	-0.00712697	-0.00772113	-0.00819666	-0.00861178	-0.00891723	-0.00919041		-69.9875	-58.5106	-58.1352	-58.2917	-58.7607	-59.1986	-59.6051	-60.3244	-60.7935	-61.4501	-61.6691	-62.2945
17.5	-0.00231241	-0.00358374	-0.00425847	-0.00502785	-0.00578395	-0.00649904	-0.00713833	-0.00773205	-0.00820203	-0.00862347	-0.00892168	-0.00919527		-69.9563	-58.5106	-58.0103	-58.323	-58.7921	-59.1986	-59.5738	-60.3244	-60.731	-61.5128	-61.6379	-62.2946
17.52	-0.0023136	-0.00359745	-0.00427753	-0.00504133	-0.00579768	-0.00651169	-0.00715155	-0.00774489	-0.00821367	-0.00864351	-0.00893503	-0.00920465		-69.9875	-58.5106	-58.104	-58.2604	-58.7607	-59.1673	-59.5738	-60.3556	-60.7622	-61.7003	-61.7316	-62.357
17.54	-0.00231478	-0.00361207	-0.00429009	-0.00505748	-0.00582012	-0.00653089	-0.00716656	-0.00775957	-0.00822725	-0.0086588	-0.0089415	-0.00920934		-70.0188	-58.5418	-58.0102	-58.2604	-58.9171	-59.2611	-59.6051	-60.4182	-60.8247	-61.8254	-61.7316	-62.3571
17.56	-0.00231595	-0.00362399	-0.00430923	-0.00507989	-0.00583638	-0.00654335	-0.00718681	-0.00777791	-0.00823659	-0.00865879	-0.00894797	-0.0092163		-70.0501	-58.4793	-58.1041	-58.4168	-58.9484	-59.2299	-59.7303	-60.5433	-60.8248	-61.7317	-61.7316	-62.3884
17.58	-0.0023171	-0.00363783	-0.00432498	-0.00509312	-0.00584967	-0.00656076	-0.00719598	-0.00778433	-0.00825203	-0.00867399	-0.00895221	-0.00922316		-70.0813	-58.4793	-58.104	-58.3542	-58.9171	-59.2923	-59.6676	-60.4807	-60.9185	-61.8567	-61.7003	-62.4195
17.6	-0.00231661	-0.00365081	-0.00434181	-0.0051078	-0.00585872	-0.00657475	-0.00721785	-0.00779671	-0.00825904	-0.00866315	-0.00896319	-0.00922768		-70.0188	-58.448	-58.1353	-58.323	-58.7921	-59.2923	-59.824	-60.512	-60.8873	-61.6065	-61.7629	-62.4196
17.62	-0.00231615	-0.00366566	-0.00435432	-0.00512258	-0.00586524	-0.00658712	-0.00722317	-0.00780514	-0.00826818	-0.00866155	-0.00896513	-0.00922764		-69.9563	-58.4793	-58.0415	-58.2917	-58.6045	-59.2611	-59.699	-60.4807	-60.8873	-61.4815	-61.7004	-62.3571
17.64	-0.00231679	-0.00368047	-0.00437565	-0.00513872	-0.00588248	-0.00660122	-0.00724318	-0.0078098	-0.00827527	-0.00867315	-0.0089761	-0.00922092		-69.9563	-58.5106	-58.1979	-58.2917	-58.6357	-59.2612	-59.824	-60.387	-60.856	-61.5441	-61.7629	-62.2008
17.66	-0.00231853	-0.00369163	-0.00439337	-0.00515487	-0.00589818	-0.00661694	-0.00725565	-0.00782439	-0.0082927	-0.008691	-0.00898469	-0.00923282		-70.0188	-58.4168	-58.2604	-58.2916	-58.6356	-59.2924	-59.824	-60.4495	-60.9811	-61.7003	-61.7942	-62.2946
17.68	-0.00231806	-0.00370572	-0.00440665	-0.00517487	-0.00591827	-0.00662767	-0.00726811	-0.00783105	-0.00829951	-0.00868482	-0.00899096	-0.00923079		-69.9563	-58.4168	-58.1979	-58.3856	-58.7295	-59.2299	-59.824	-60.3869	-60.9499	-61.5128	-61.7942	-62.2008
17.7	-0.0023198	-0.00371893	-0.0044201	-0.00519461	-0.0059381	-0.00665008	-0.00728058	-0.00784177	-0.00831667	-0.00869633	-0.00899723	-0.00924497		-70.0188	-58.3855	-58.1353	-58.4793	-58.8233	-59.3862	-59.824	-60.3869	-61.0749	-61.5753	-61.7942	-62.3258
17.72	-0.00231987	-0.00373404	-0.004437	-0.00520642	-0.00594886	-0.00666216	-0.00729485	-0.00785054	-0.00831702	-0.00869474	-0.00900572	-0.00925199		-69.9875	-58.4168	-58.1666	-58.3854	-58.7295	-59.3549	-59.8552	-60.3556	-60.9498	-61.4501	-61.8254	-62.3571
17.74	-0.00232105	-0.00375002	-0.00445492	-0.00522751	-0.00596873	-0.00667764	-0.00730179	-0.00786524	-0.00833214	-0.00870642	-0.00900522	-0.00926348		-70.0188	-58.4793	-58.2292	-58.5106	-58.8233	-59.3862	-59.7614	-60.4182	-61.0436	-61.5127	-61.7316	-62.4508
17.76	-0.00232167	-0.00376314	-0.00447051	-0.00523924	-0.00598686	-0.00668807	-0.00731446	-0.00787586	-0.00834081	-0.008705	-0.00902056	-0.0092679		-70.0188	-58.448	-58.2291	-58.4168	-58.8858	-59.3237	-59.7615	-60.4182	-61.0436	-61.3876	-61.8567	-62.4509
17.78	-0.00232229	-0.00377818	-0.00448393	-0.00525641	-0.00600186	-0.00671028	-0.00733074	-0.00789429	-0.00834741	-0.00871469	-0.00902888	-0.00926543		-70.0188	-58.4793	-58.1666	-58.4481	-58.8858	-59.48	-59.824	-60.5432	-61.0124	-61.4189	-61.888	-62.357
17.8	-0.00232291	-0.00379132	-0.00449753	-0.00527092	-0.00601241	-0.00672706	-0.00734866	-0.00789866	-0.00836237	-0.00872429	-0.00903041	-0.00927465		-70.0188	-58.448	-58.104	-58.4168	-58.792	-59.5425	-59.9179	-60.4494	-61.1062	-61.4502	-61.8254	-62.4196
17.82	-0.00232352	-0.00380456	-0.00451131	-0.00528683	-0.00603516	-0.00673367	-0.00735538	-0.0079131	-0.00837706	-0.0087338	-0.00904552	-0.0092837		-70.0188	-58.4168	-58.0415	-58.4168	-58.9484	-59.4174	-59.824	-60.512	-61.2	-61.4814	-61.9505	-62.4821
17.84	-0.00232469	-0.00381788	-0.00452971	-0.00530666	-0.00604999	-0.006754	-0.00737514	-0.00793129	-0.00838321	-0.00874107	-0.00904687	-0.00928803		-70.0501	-58.3855	-58.1041	-58.5106	-58.9484	-59.5426	-59.9491	-60.6371	-61.1688	-61.4815	-61.888	-62.4822
17.86	-0.00232475	-0.00383317	-0.0045424	-0.00531971	-0.00606932	-0.00676727	-0.00738905	-0.00793929	-0.00839151	-0.00874399	-0.00905957	-0.00929004		-70.0188	-58.4168	-58.0102	-58.4481	-59.0422	-59.5426	-59.9803	-60.6058	-61.1688	-61.4189	-61.9818	-62.4509
17.88	-0.00232482	-0.00384747	-0.00456206	-0.00533425	-0.00607939	-0.00677552	-0.00739921	-0.00794541	-0.00839148	-0.00874925	-0.00906531	-0.00928754		-69.9875	-58.4168	-58.104	-58.4168	-58.9484	-59.4487	-59.949	-60.5433	-61.0436	-61.3876	-61.9818	-62.357
17.9	-0.00232545	-0.00386178	-0.00457925	-0.00535153	-0.00608973	-0.00679748	-0.00740396	-0.00795761	-0.00839597	-0.00875893	-0.00907777	-0.00929217		-69.9875	-58.4168	-58.1353	-58.448	-58.8545	-59.605	-59.824	-60.5746	-60.9811	-61.4189	-62.0756	-62.3571
17.92	-0.00232717	-0.00387517	-0.00460089	-0.00537138	-0.00611091	-0.00681226	-0.00741459	-0.00796973	-0.00840687	-0.00877286	-0.00908326	-0.00930138		-70.0501	-58.3855	-58.2917	-58.5419	-58.9796	-59.6364	-59.7928	-60.6059	-61.0124	-61.5128	-62.0757	-62.4197
17.94	-0.00232777	-0.00388771	-0.00461422	-0.00538435	-0.0061272	-0.00682189	-0.00742899	-0.00797977	-0.00841767	-0.00878002	-0.00908873	-0.00931043		-70.0501	-58.3229	-58.2291	-58.4793	-59.0109	-59.5738	-59.8241	-60.6059	-61.0437	-61.5128	-62.0757	-62.4822
17.96	-0.00232783	-0.00390231	-0.00462887	-0.00539752	-0.00613885	-0.00683677	-0.00743777	-0.0079819	-0.00842213	-0.00878934	-0.00909645	-0.00931472		-70.0188	-58.3229	-58.1978	-58.4168	-58.9484	-59.6051	-59.7615	-60.4808	-60.9811	-61.544	-62.1069	-62.4821
17.98	-0.00232844	-0.0039198	-0.00464248	-0.00541753	-0.00615222	-0.00684479	-0.00745226	-0.00799626	-0.00843302	-0.00879857	-0.00910409	-0.00932131		-70.0188	-58.4168	-58.1353	-58.5106	-58.9171	-59.5113	-59.7927	-60.5433	-61.0124	-61.5753	-62.1382	-62.5134
18	-0.00232851	-0.00393326	-0.00466542	-0.00543328	-0.00616264	-0.00685818	-0.00745928	-0.00801044	-0.00843755	-0.00880554	-0.00909815	-0.00930942		-69.9875	-58.3855	-58.3229	-58.5105	-58.8233	-59.5113	-59.6989	-60.6058	-60.9498	-61.5752	-61.9818	-62.2945
18.02	-0.00232914	-0.00394777	-0.00467641	-0.00544636	-0.00617792	-0.00686986	-0.00747213	-0.00801849	-0.00844853	-0.00881033	-0.00910611	-0.00931647		-69.9875	-58.3855	-58.1979	-58.448	-58.8233	-59.48	-59.6989	-60.5745	-60.9811	-61.544	-62.0131	-62.3257
18.04	-0.00233031	-0.0039623	-0.00468776	-0.00546502	-0.00619473	-0.00688675	-0.0074924	-0.00803259	-0.00845942	-0.0088152	-0.00911172	-0.00933037		-70.0188	-58.3855	-58.0728	-58.5106	-58.8546	-59.5425	-59.824	-60.6371	-61.0124	-61.5127	-62.013	-62.4509
18.06	-0.00233038	-0.00397685	-0.00470868	-0.0054808	-0.00620686	-0.00689152	-0.00750114	-0.00804252	-0.00845764	-0.00882669	-0.00910833	-0.00933011		-69.9875	-58.3855	-58.1978	-58.5105	-58.792	-59.3862	-59.7614	-60.637	-60.856	-61.5752	-61.8879	-62.3883
18.08	-0.00233101	-0.00398753	-0.00472466	-0.00549661	-0.0062238	-0.00691213	-0.00751379	-0.00806043	-0.00847728	-0.00883365	-0.00911203	-0.00933924		-69.9875	-58.2604	-58.1978	-58.5105	-58.8232	-59.5113	-59.7614	-60.7621	-61.0124	-61.5753	-61.8567	-62.4509
18.1	-0.00233163	-0.00400438	-0.00473834	-0.00551243	-0.00624682	-0.00692381	-0.00753204	-0.008066	-0.00848596	-0.00883623	-0.00911805	-0.00933897		-69.9875	-58.3229	-58.1353	-58.5106	-58.9796	-59.48	-59.8553	-60.6996	-61.0123	-61.5127	-61.8567	-62.3883
18.12	-0.00233171	-0.00401817	-0.0047557	-0.00552553	-0.00626166	-0.00693731	-0.0075388	-0.00807576	-0.00848835	-0.00884116	-0.00912408	-0.00934348		-69.9563	-58.2917	-58.1667	-58.4481	-58.9797	-59.4801	-59.7615	-60.6997	-60.9186	-61.4815	-61.8568	-62.3884
18.14	-0.00233345	-0.00403303	-0.00477182	-0.00554428	-0.0062796	-0.00695424	-0.00755893	-0.0080895	-0.00850783	-0.00885493	-0.00912783	-0.00935721		-70.0188	-58.2917	-58.1666	-58.5105	-59.0422	-59.5426	-59.8865	-60.7622	-61.0749	-61.5753	-61.8254	-62.5135
18.16	-0.00233461	-0.0040489	-0.00479148	-0.00556699	-0.00629892	-0.00696754	-0.00757683	-0.00810708	-0.00852055	-0.00886406	-0.00914523	-0.00936832		-70.0501	-58.3229	-58.2604	-58.6669	-59.136	-59.5426	-59.9804	-60.8873	-61.1375	-61.6066	-61.9818	-62.6073
18.18	-0.00233411	-0.00406075	-0.0048003	-0.00557551	-0.00630551	-0.00698257	-0.00759068	-0.00811226	-0.00851831	-0.00886651	-0.00914413	-0.00936071		-69.9875	-58.2291	-58.0728	-58.5105	-58.9797	-59.5738	-60.0116	-60.8247	-60.9811	-61.5439	-61.888	-62.4509
18.2	-0.00233528	-0.00407484	-0.00481557	-0.0055969	-0.00632193	-0.00699406	-0.00760821	-0.00811359	-0.00853552	-0.00887573	-0.00915231	-0.00936735		-70.0188	-58.1979	-58.0415	-58.6356	-59.0109	-59.5426	-60.1054	-60.6996	-61.1062	-61.5753	-61.9193	-62.4822
18.22	-0.00233534	-0.00409102	-0.00483449	-0.00561103	-0.00633827	-0.00700563	-0.00762169	-0.0081213	-0.0085545	-0.00888045	-0.00916041	-0.00937391		-69.9875	-58.2291	-58.104	-58.6043	-59.0422	-59.5113	-60.1367	-60.6683	-61.2625	-61.5439	-61.9505	-62.5134
18.24	-0.00233597	-0.00410614	-0.0048485	-0.00562803	-0.00634982	-0.00702599	-0.00763131	-0.00813112	-0.00856034	-0.00889186	-0.00917296	-0.00938734		-69.9875	-58.2291	-58.0415	-58.6356	-58.9797	-59.6364	-60.1055	-60.6683	-61.2312	-61.6065	-62.0444	-62.6385
18.26	-0.00233604	-0.00412129	-0.0048651	-0.00564635	-0.00636313	-0.00703553	-0.00764669	-0.00813892	-0.00856838	-0.0088965	-0.00917618	-0.00937499		-69.9563	-58.2291	-58.0416	-58.6982	-58.9485	-59.5739	-60.1681	-60.6371	-61.2313	-61.5753	-62.0131	-62.4197
18.28	-0.00233778	-0.00413544	-0.0048817	-0.00566311	-0.00638125	-0.00705223	-0.00766377	-0.00814681	-0.00857429	-0.00890341	-0.00918402	-0.00938634		-70.0188	-58.1979	-58.0415	-58.7295	-59.0109	-59.6363	-60.2618	-60.6059	-61.2	-61.5753	-62.0443	-62.5135
18.3	-0.00233894	-0.00415172	-0.00490314	-0.00567419	-0.00639763	-0.00706176	-0.007673	-0.00816084	-0.00858029	-0.00891694	-0.00920315	-0.00938818		-70.0501	-58.2291	-58.1666	-58.6357	-59.0422	-59.5738	-60.2306	-60.6684	-61.1688	-61.6691	-62.232	-62.4822
18.32	-0.00233898	-0.00416591	-0.0049146	-0.00569116	-0.00641075	-0.00707324	-0.00768231	-0.00817671	-0.00859274	-0.00892138	-0.0092036	-0.00940169		-70.0188	-58.1979	-58.0415	-58.667	-59.0109	-59.5426	-60.1993	-60.7622	-61.2313	-61.6379	-62.1695	-62.6073
18.34	-0.00233959	-0.00418019	-0.00493248	-0.00570946	-0.00642873	-0.00709006	-0.00769361	-0.00818624	-0.0086029	-0.00893473	-0.00921558	-0.00940327		-70.0188	-58.1666	-58.0728	-58.7295	-59.0734	-59.6051	-60.1993	-60.7622	-61.2626	-61.7316	-62.2633	-62.5759
18.36	-0.0023391	-0.00419457	-0.00494421	-0.00572054	-0.00643858	-0.00709791	-0.00770301	-0.0081917	-0.00860231	-0.00893678	-0.00922276	-0.00940727		-69.9563	-58.1353	-57.9477	-58.6357	-58.9797	-59.5113	-60.1681	-60.6997	-61.1375	-61.6691	-62.2946	-62.576
18.38	-0.00234083	-0.00420905	-0.0049685	-0.00574462	-0.00645349	-0.00711485	-0.00772013	-0.0082075	-0.00861058	-0.00894121	-0.00923214	-0.00941126		-70.0188	-58.104	-58.1353	-58.8233	-58.9797	-59.5738	-60.2618	-60.7935	-61.1374	-61.6378	-62.3571	-62.576
18.4	-0.00234199	-0.00422364	-0.00499231	-0.00576252	-0.00647481	-0.00712631	-0.00774082	-0.00821489	-0.00862313	-0.00894793	-0.00924593	-0.00942222		-70.0501	-58.0728	-58.323	-58.8859	-59.1048	-59.5426	-60.4182	-60.7622	-61.2	-61.6378	-62.4822	-62.6698
18.42	-0.00234259	-0.00423728	-0.00500208	-0.00577881	-0.00649256	-0.00714671	-0.00775339	-0.0082244	-0.00864191	-0.00895686	-0.00924114	-0.00942597		-70.0501	-58.0102	-58.1666	-58.9171	-59.1674	-59.6677	-60.4495	-60.7622	-61.3564	-61.6691	-62.3571	-62.6698
18.44	-0.00234318	-0.00425943	-0.00502217	-0.00578933	-0.0065053	-0.00716142	-0.00775625	-0.00824003	-0.00865171	-0.00896348	-0.00924809	-0.00943437		-70.0501	-58.1979	-58.2604	-58.8234	-59.1361	-59.699	-60.3244	-60.856	-61.3877	-61.6691	-62.3884	-62.7324
18.46	-0.00234267	-0.00427277	-0.00503583	-0.00580583	-0.00652459	-0.00716716	-0.00776525	-0.00823905	-0.00866569	-0.00896123	-0.00925494	-0.00942866		-69.9875	-58.1353	-58.1978	-58.8545	-59.2298	-59.5738	-60.2931	-60.6996	-61.4814	-61.544	-62.4196	-62.6073
18.48	-0.00234274	-0.00428733	-0.00505465	-0.00581508	-0.00653553	-0.00718039	-0.00777626	-0.00825283	-0.0086687	-0.00897485	-0.00924801	-0.00943953		-69.9563	-58.104	-58.2605	-58.7295	-59.1674	-59.5739	-60.2932	-60.7623	-61.4189	-61.6379	-62.2633	-62.7011
18.5	-0.00234448	-0.004302	-0.0050758	-0.00583621	-0.00655475	-0.00719718	-0.00779305	-0.00826437	-0.00868691	-0.00898599	-0.00925975	-0.00944785		-70.0188	-58.0728	-58.3855	-58.8546	-59.2611	-59.6363	-60.3869	-60.7935	-61.5753	-61.7004	-62.3571	-62.7636
18.52	-0.00234398	-0.00431782	-0.00508538	-0.00584545	-0.00656234	-0.00720487	-0.00779992	-0.00826968	-0.0087004	-0.00899251	-0.0092621	-0.00943971		-69.9563	-58.0728	-58.2292	-58.7295	-59.1361	-59.5426	-60.3244	-60.731	-61.6691	-61.7004	-62.3258	-62.6073
18.54	-0.00234627	-0.00433261	-0.00510417	-0.00587097	-0.00658495	-0.00722356	-0.00781857	-0.00828746	-0.0087201	-0.00900348	-0.0092714	-0.00945758		-70.0501	-58.0415	-58.2917	-58.9484	-59.2924	-59.6364	-60.4495	-60.856	-61.8567	-61.7629	-62.3884	-62.7949
18.56	-0.00234575	-0.00434856	-0.00512281	-0.00588282	-0.00659242	-0.00723839	-0.00783104	-0.00829052	-0.00871345	-0.00900313	-0.00927137	-0.00945401		-69.9875	-58.0415	-58.3542	-58.8858	-59.1673	-59.6677	-60.4807	-60.7622	-61.6691	-61.669	-62.3258	-62.7011
18.58	-0.00234692	-0.00436453	-0.00513625	-0.00589631	-0.00661007	-0.00724774	-0.00783761	-0.00830617	-0.00872885	-0.00900751	-0.00927837	-0.00947166		-70.0188	-58.0415	-58.2917	-58.8546	-59.2298	-59.6051	-60.4182	-60.856	-61.7942	-61.6378	-62.357	-62.8887
18.6	-0.00234698	-0.00438266	-0.0051524	-0.00590698	-0.0066259	-0.00727167	-0.00785212	-0.00831538	-0.00872017	-0.00902087	-0.00928529	-0.00946084		-69.9875	-58.104	-58.2917	-58.7608	-59.261	-59.7927	-60.4807	-60.856	-61.5752	-61.7316	-62.3883	-62.701
18.62	-0.0023487	-0.00439958	-0.00517239	-0.0059194	-0.00664493	-0.00728423	-0.0078684	-0.00833283	-0.0087272	-0.00903176	-0.00929442	-0.00946682		-70.0501	-58.1353	-58.3855	-58.6983	-59.3549	-59.7928	-60.5745	-60.9811	-61.5753	-61.7942	-62.4509	-62.7323
18.64	-0.00234818	-0.00441861	-0.00518575	-0.00593346	-0.00665546	-0.0073004	-0.00786882	-0.00833548	-0.00873421	-0.009038	-0.00928275	-0.00946805		-69.9875	-58.2291	-58.3229	-58.6669	-59.2924	-59.8552	-60.4182	-60.8872	-61.5753	-61.7941	-62.232	-62.701
18.66	-0.00234825	-0.00443307	-0.00519802	-0.0059447	-0.00666618	-0.00730735	-0.00787749	-0.00834666	-0.00874554	-0.00903977	-0.00928769	-0.00946235		-69.9563	-58.1979	-58.2291	-58.5731	-59.2299	-59.7615	-60.387	-60.9186	-61.6378	-61.7317	-62.2321	-62.576
18.68	-0.00234888	-0.00444872	-0.00522084	-0.00596799	-0.00668039	-0.00732363	-0.00788819	-0.00835775	-0.00874373	-0.00905065	-0.00929033	-0.00947564		-69.9563	-58.1979	-58.3856	-58.7295	-59.2299	-59.824	-60.3869	-60.9499	-61.5128	-61.7942	-62.2008	-62.7011
18.7	-0.00235116	-0.0044633	-0.00524195	-0.00598937	-0.00670454	-0.00733791	-0.00790085	-0.00837702	-0.0087574	-0.00905912	-0.00930682	-0.00948395		-70.0501	-58.1666	-58.5106	-58.8546	-59.4175	-59.8553	-60.4182	-61.1062	-61.6066	-61.8255	-62.3571	-62.7636
18.72	-0.0023512	-0.00448017	-0.00525368	-0.00600002	-0.00671652	-0.0073521	-0.0079095	-0.0083772	-0.00875563	-0.0090675	-0.00931373	-0.00948509		-70.0188	-58.1979	-58.4167	-58.7608	-59.3862	-59.8865	-60.3869	-60.9811	-61.4814	-61.8567	-62.3884	-62.7324
18.74	-0.00235125	-0.00449588	-0.00527217	-0.00601689	-0.0067286	-0.00735526	-0.0079202	-0.00838809	-0.00876288	-0.00906234	-0.00932054	-0.00948395		-69.9875	-58.1979	-58.4793	-58.792	-59.3549	-59.7301	-60.3869	-61.0123	-61.4814	-61.7003	-62.4195	-62.6698
18.76	-0.00235242	-0.00451272	-0.00528529	-0.00603666	-0.00674078	-0.00736984	-0.00793287	-0.00839891	-0.00876362	-0.00908004	-0.00932729	-0.00949		-70.0188	-58.2291	-58.4168	-58.8858	-59.3237	-59.7615	-60.4182	-61.0436	-61.3876	-61.8567	-62.4509	-62.7011
18.78	-0.00235246	-0.00452505	-0.00530121	-0.00605018	-0.00676139	-0.00738432	-0.00794936	-0.00840338	-0.00877112	-0.00908609	-0.00932243	-0.00949595		-69.9875	-58.1353	-58.4168	-58.8545	-59.4487	-59.7927	-60.5119	-60.9811	-61.3876	-61.8567	-62.3257	-62.7323
18.8	-0.00235363	-0.00453988	-0.00531715	-0.00606232	-0.00677998	-0.00740422	-0.00795575	-0.00842053	-0.00878297	-0.00908988	-0.00933402	-0.00949716		-70.0188	-58.104	-58.4168	-58.792	-59.5425	-59.9179	-60.4494	-61.1062	-61.4502	-61.8254	-62.4196	-62.7011
18.82	-0.00235423	-0.00455369	-0.0053331	-0.00608515	-0.00678654	-0.00741089	-0.0079702	-0.00843524	-0.00879246	-0.00910501	-0.00934306	-0.00950311		-70.0188	-58.0415	-58.4168	-58.9484	-59.4174	-59.824	-60.512	-61.2	-61.4814	-61.9505	-62.4821	-62.7323
18.84	-0.00235483	-0.00457105	-0.00535169	-0.0060985	-0.00680526	-0.00742887	-0.00798645	-0.00843926	-0.00879752	-0.00910404	-0.00934502	-0.0095043		-70.0188	-58.0728	-58.4793	-58.9171	-59.5113	-59.9178	-60.6058	-61.1375	-61.4502	-61.8567	-62.4509	-62.7011
18.86	-0.00235543	-0.00458497	-0.00536616	-0.0061195	-0.00682032	-0.00744473	-0.00799649	-0.00844971	-0.00880265	-0.00911908	-0.00934937	-0.0095126		-70.0188	-58.0102	-58.4481	-59.0422	-59.5426	-59.9803	-60.6058	-61.1688	-61.4189	-61.9818	-62.4509	-62.7636
18.88	-0.00235603	-0.00460585	-0.00538206	-0.00613107	-0.00683023	-0.00745671	-0.00800455	-0.00845169	-0.00881004	-0.00912703	-0.00934909	-0.0095184		-70.0188	-58.1353	-58.4481	-58.9797	-59.48	-59.9803	-60.5746	-61.0749	-61.4189	-62.0131	-62.3883	-62.7949
18.9	-0.00235497	-0.00461962	-0.00539531	-0.00613675	-0.00684709	-0.00745577	-0.00801071	-0.00844975	-0.00881307	-0.00913264	-0.00934666	-0.00950768		-69.925	-58.0728	-58.3855	-58.792	-59.5425	-59.7615	-60.5121	-60.9186	-61.3564	-62.0131	-62.2946	-62.6072
18.92	-0.00235616	-0.0046404	-0.00541409	-0.00615667	-0.00686038	-0.00746473	-0.00802101	-0.00845872	-0.008825	-0.00913599	-0.00935371	-0.00951387		-69.9563	-58.1979	-58.4481	-58.8858	-59.5426	-59.699	-60.5121	-60.9186	-61.419	-61.9819	-62.3259	-62.6386
18.94	-0.00235679	-0.00465401	-0.00542735	-0.00617328	-0.00687027	-0.00747943	-0.00803131	-0.00846979	-0.00883238	-0.00914168	-0.00936297	-0.00951761		-69.9563	-58.1353	-58.3855	-58.9171	-59.48	-59.7303	-60.5121	-60.9499	-61.419	-61.9819	-62.3884	-62.6385
18.96	-0.00235907	-0.00467354	-0.00544617	-0.00619134	-0.00689227	-0.00749589	-0.00804161	-0.00848286	-0.00885069	-0.00915866	-0.0093767	-0.00953547		-70.0501	-58.2291	-58.4481	-58.9797	-59.6364	-59.7928	-60.5121	-61.0124	-61.5753	-62.1382	-62.5134	-62.8262
18.98	-0.00235966	-0.00468709	-0.00546617	-0.00620462	-0.00690017	-0.0075103	-0.0080559	-0.00849365	-0.00885983	-0.00916619	-0.00938319	-0.00954581		-70.0501	-58.1666	-58.5419	-58.9484	-59.5426	-59.824	-60.5746	-61.0437	-61.6066	-62.1695	-62.5447	-62.92
19	-0.00235858	-0.00470775	-0.00547916	-0.00621186	-0.00691004	-0.00751345	-0.008066	-0.00849383	-0.00886229	-0.00915552	-0.00936644	-0.0095371		-69.9563	-58.2917	-58.4793	-58.7921	-59.4801	-59.6677	-60.5746	-60.9186	-61.544	-61.9506	-62.2633	-62.7637
19.02	-0.00235975	-0.00471999	-0.0054937	-0.00622879	-0.00692353	-0.00752826	-0.0080761	-0.00850699	-0.00886931	-0.0091658	-0.00937585	-0.00954053		-69.9875	-58.1979	-58.448	-58.8233	-59.48	-59.6989	-60.5745	-60.9811	-61.544	-62.0131	-62.3257	-62.7636
19.04	-0.00236203	-0.00473366	-0.00551513	-0.00624873	-0.00694388	-0.00755232	-0.00809422	-0.00852208	-0.00887851	-0.0091759	-0.0093944	-0.00955102		-70.0813	-58.1353	-58.5731	-58.9171	-59.605	-59.8865	-60.6996	-61.0749	-61.5752	-62.0755	-62.5134	-62.8574
19.06	-0.00235982	-0.00474985	-0.00552533	-0.00625449	-0.00694153	-0.00755335	-0.00809593	-0.00851159	-0.00888104	-0.00916318	-0.00938464	-0.00954009		-69.925	-58.1353	-58.448	-58.7295	-59.3237	-59.6989	-60.5745	-60.7935	-61.5127	-61.8254	-62.3258	-62.6698
19.08	-0.00236102	-0.00476722	-0.00554272	-0.0062732	-0.00696412	-0.00756808	-0.00811607	-0.00853357	-0.00889034	-0.00916926	-0.00939623	-0.00955081		-69.9563	-58.1666	-58.4793	-58.792	-59.4801	-59.7302	-60.7309	-60.9812	-61.5441	-61.8255	-62.4197	-62.7637
19.1	-0.00236219	-0.00478218	-0.00556004	-0.00629796	-0.00697761	-0.00758834	-0.0081237	-0.00854443	-0.00889513	-0.0091776	-0.00939828	-0.00955187		-69.9875	-58.1353	-58.5106	-58.9796	-59.48	-59.8553	-60.6996	-61.0123	-61.5127	-61.8567	-62.3883	-62.7323
19.12	-0.0023628	-0.00480078	-0.00557452	-0.00631438	-0.00699284	-0.00759693	-0.00813544	-0.00854886	-0.00890222	-0.00918585	-0.00940506	-0.00956008		-69.9875	-58.1979	-58.4793	-59.0109	-59.5113	-59.7927	-60.7309	-60.9498	-61.5127	-61.888	-62.4196	-62.7949
19.14	-0.00236452	-0.00481687	-0.00559325	-0.00633228	-0.00700972	-0.00761703	-0.00814911	-0.0085683	-0.00891592	-0.00918947	-0.00941873	-0.00956342		-70.0501	-58.1979	-58.5418	-59.0735	-59.5739	-59.9178	-60.7935	-61.1062	-61.6066	-61.8567	-62.5448	-62.7949
19.16	-0.00236454	-0.00483415	-0.00561319	-0.00634843	-0.00701945	-0.00763108	-0.00816259	-0.00857668	-0.00892053	-0.00920227	-0.00942511	-0.00955967		-70.0188	-58.2291	-58.6356	-59.1047	-59.5113	-59.9491	-60.856	-61.1062	-61.5753	-61.9505	-62.576	-62.7011
19.18	-0.00236458	-0.00484423	-0.00562317	-0.00635664	-0.00703634	-0.00764693	-0.00816983	-0.00857656	-0.00892521	-0.00920344	-0.00941978	-0.00956087		-69.9875	-58.0728	-58.5105	-58.9797	-59.5738	-60.0116	-60.8247	-60.9811	-61.5439	-61.888	-62.4509	-62.6697
19.2	-0.0023663	-0.00486073	-0.00564603	-0.00637467	-0.00704956	-0.0076664	-0.00817311	-0.00859594	-0.00893662	-0.00921388	-0.00942872	-0.00957159		-70.0501	-58.0728	-58.6669	-59.0422	-59.5739	-60.1367	-60.7309	-61.1375	-61.6066	-61.9506	-62.5135	-62.7636
19.22	-0.00236577	-0.00487844	-0.00565869	-0.00638936	-0.00705928	-0.00767789	-0.00817867	-0.00861274	-0.00893899	-0.00921958	-0.00943284	-0.00957499		-69.9875	-58.104	-58.6043	-59.0422	-59.5113	-60.1367	-60.6683	-61.2625	-61.5439	-61.9505	-62.5134	-62.7636
19.24	-0.00236637	-0.00489248	-0.00567574	-0.0064009	-0.0070797	-0.00768748	-0.00818847	-0.00861853	-0.00895039	-0.00923213	-0.00944628	-0.00957839		-69.9875	-58.0415	-58.6356	-58.9797	-59.6364	-60.1055	-60.6683	-61.2312	-61.6065	-62.0444	-62.6385	-62.7636
19.26	-0.00236698	-0.00491032	-0.00569552	-0.0064158	-0.00709097	-0.00770479	-0.00819826	-0.00862868	-0.00895719	-0.00923758	-0.0094361	-0.00959361		-69.9875	-58.0728	-58.7294	-58.9797	-59.6051	-60.1993	-60.6683	-61.2625	-61.6065	-62.0443	-62.4509	-62.92
19.28	-0.00236759	-0.00492447	-0.00570941	-0.0064307	-0.0071041	-0.00771799	-0.00820196	-0.00863018	-0.00895955	-0.00924074	-0.00944271	-0.00959426		-69.9875	-58.0102	-58.6982	-58.9796	-59.605	-60.2305	-60.5746	-61.1687	-61.544	-62.013	-62.4822	-62.8887
19.3	-0.00236819	-0.00494488	-0.00571917	-0.00644561	-0.00711194	-0.00772537	-0.00821406	-0.00863409	-0.00897095	-0.00925771	-0.00944223	-0.00958788		-69.9875	-58.104	-58.5731	-58.9796	-59.5112	-60.168	-60.6058	-61.1062	-61.6065	-62.1694	-62.4196	-62.7636
19.32	-0.00236991	-0.00496018	-0.00574062	-0.00646373	-0.0071289	-0.0077406	-0.00823626	-0.00865315	-0.00898218	-0.00926512	-0.00946292	-0.00959837		-70.0501	-58.0728	-58.6983	-59.0422	-59.5739	-60.2306	-60.7935	-61.2626	-61.6692	-62.2008	-62.6386	-62.8575
19.34	-0.00236937	-0.00497558	-0.00575604	-0.00647845	-0.00714212	-0.00774796	-0.00824159	-0.00865891	-0.008991	-0.00927243	-0.00945969	-0.00960389		-69.9875	-58.0415	-58.6982	-59.0421	-59.5738	-60.168	-60.7309	-61.2313	-61.7003	-62.232	-62.5446	-62.8887
19.36	-0.00237109	-0.00499231	-0.0057729	-0.0064948	-0.00715712	-0.00776512	-0.00825527	-0.0086669	-0.00900198	-0.00928884	-0.00947307	-0.00961408		-70.0501	-58.0415	-58.7295	-59.0735	-59.6051	-60.2619	-60.7935	-61.2313	-61.7629	-62.3884	-62.6698	-62.9826
19.38	-0.00237	-0.0050103	-0.00578968	-0.0065014	-0.00716492	-0.00777236	-0.00826059	-0.00866415	-0.00899497	-0.0092865	-0.00946509	-0.0096122		-69.9563	-58.0728	-58.7608	-58.9172	-59.5113	-60.1993	-60.731	-61.0749	-61.5753	-62.2946	-62.5135	-62.9201
19.4	-0.00237006	-0.00503192	-0.00580494	-0.00651976	-0.00717302	-0.00778944	-0.00826402	-0.00867257	-0.00899736	-0.00929587	-0.00947152	-0.00961519		-69.925	-58.1979	-58.7608	-58.9797	-59.4175	-60.2931	-60.6371	-61.0749	-61.5127	-62.3571	-62.5447	-62.92
19.42	-0.00237236	-0.00504577	-0.00582595	-0.00654279	-0.0071992	-0.00780817	-0.00828003	-0.00869821	-0.0090133	-0.00929818	-0.00948255	-0.00962529		-70.0188	-58.1353	-58.8858	-59.1361	-59.6364	-60.4182	-60.7309	-61.3251	-61.6378	-62.3258	-62.6385	-63.0138
19.44	-0.00237295	-0.00506603	-0.00583655	-0.00655563	-0.00721403	-0.00781106	-0.00829577	-0.00870807	-0.00901997	-0.00930517	-0.00949101	-0.00962569		-70.0188	-58.2291	-58.7921	-59.1048	-59.6677	-60.2931	-60.8247	-61.3564	-61.6378	-62.3571	-62.7011	-62.9825
19.46	-0.00237354	-0.0050823	-0.00585607	-0.00657832	-0.00722339	-0.007824	-0.00829891	-0.00872647	-0.00902218	-0.00931667	-0.00948995	-0.00962854		-70.0188	-58.2291	-58.8858	-59.2611	-59.6051	-60.3244	-60.7309	-61.5127	-61.5753	-62.4509	-62.6386	-62.9826
19.48	-0.00237357	-0.0051011	-0.00586521	-0.00658915	-0.00723652	-0.00783491	-0.0083126	-0.00872933	-0.00903572	-0.00930954	-0.00950074	-0.00961951		-69.9875	-58.2917	-58.7607	-59.1986	-59.6051	-60.3244	-60.7935	-61.4501	-61.6691	-62.2945	-62.7323	-62.8262
19.5	-0.00237417	-0.00511973	-0.00588343	-0.00660506	-0.00724965	-0.00784775	-0.00831992	-0.00874317	-0.00904229	-0.0093166	-0.00950428	-0.00962034		-69.9875	-58.3542	-58.8233	-59.2298	-59.605	-60.3556	-60.7622	-61.544	-61.6691	-62.3258	-62.7323	-62.7948
19.52	-0.00237533	-0.00513317	-0.0058971	-0.00661763	-0.00726279	-0.0078605	-0.00833146	-0.00876325	-0.00905558	-0.00932588	-0.00950312	-0.00963313		-70.0188	-58.2917	-58.792	-59.1986	-59.6051	-60.3869	-60.7935	-61.7316	-61.7629	-62.3883	-62.6698	-62.92
19.54	-0.00237647	-0.00514932	-0.00591963	-0.00663684	-0.00727774	-0.00787512	-0.00834497	-0.0087785	-0.00906189	-0.0093304	-0.00951619	-0.00963374		-70.0501	-58.2917	-58.9484	-59.2924	-59.6364	-60.4495	-60.856	-61.8567	-61.7629	-62.3884	-62.7949	-62.8888
19.56	-0.00237649	-0.0051693	-0.00593294	-0.00664592	-0.00729439	-0.00788955	-0.00835003	-0.0087739	-0.00906371	-0.0093326	-0.00951488	-0.00963916		-70.0188	-58.3855	-58.9171	-59.1986	-59.699	-60.512	-60.7935	-61.7004	-61.7003	-62.3571	-62.7324	-62.92
19.58	-0.00237708	-0.00518138	-0.00594489	-0.00666186	-0.00730181	-0.00789402	-0.00836354	-0.00878707	-0.0090657	-0.00933718	-0.00953014	-0.00963738		-70.0188	-58.2917	-58.8546	-59.2298	-59.6051	-60.4182	-60.856	-61.7942	-61.6378	-62.357	-62.8887	-62.8574
19.6	-0.0023771	-0.00519758	-0.00595555	-0.00667772	-0.00732582	-0.00790854	-0.00837272	-0.00877826	-0.00907907	-0.00934407	-0.00951918	-0.00964288		-69.9875	-58.2917	-58.7608	-59.261	-59.7927	-60.4807	-60.856	-61.5752	-61.7316	-62.3883	-62.701	-62.8887
19.62	-0.00237826	-0.00521636	-0.00596649	-0.00669515	-0.00733657	-0.00792289	-0.00838813	-0.00878307	-0.0090877	-0.00935088	-0.00952278	-0.00965782		-70.0188	-58.3542	-58.667	-59.3236	-59.7615	-60.5432	-60.9498	-61.544	-61.7629	-62.4196	-62.701	-63.0451
19.64	-0.00237885	-0.00523241	-0.00598362	-0.00670908	-0.0073565	-0.00792724	-0.00839496	-0.00879449	-0.00909849	-0.00934376	-0.00952872	-0.00965335		-70.0188	-58.3542	-58.6982	-59.3237	-59.8865	-60.4495	-60.9185	-61.6066	-61.8254	-62.2633	-62.7323	-62.9513
19.66	-0.00237999	-0.00524717	-0.00599771	-0.00672301	-0.00736696	-0.00793972	-0.0084102	-0.00881008	-0.00910461	-0.00935319	-0.00952753	-0.00965861		-70.0501	-58.3229	-58.6669	-59.3237	-59.8553	-60.4808	-61.0124	-61.7316	-61.8255	-62.3259	-62.6698	-62.9825
19.68	-0.00237945	-0.00526723	-0.00601784	-0.00673361	-0.00737932	-0.00794619	-0.00841684	-0.00880356	-0.00911072	-0.0093509	-0.0095359	-0.00966142		-69.9875	-58.4168	-58.7607	-59.2611	-59.8552	-60.4181	-60.9811	-61.544	-61.8254	-62.232	-62.7323	-62.9825
19.7	-0.00238004	-0.00528443	-0.00603473	-0.00675275	-0.00738803	-0.00795285	-0.00842982	-0.00881062	-0.00911232	-0.00936041	-0.00953705	-0.00966661		-69.9875	-58.448	-58.792	-59.3549	-59.7927	-60.3556	-61.0436	-61.544	-61.7629	-62.2945	-62.701	-63.0137
19.72	-0.00238176	-0.00530026	-0.00605005	-0.00676995	-0.00740793	-0.00796759	-0.00843636	-0.00881548	-0.00912762	-0.00937439	-0.00954535	-0.00967173		-70.0501	-58.448	-58.7921	-59.4175	-59.9178	-60.4182	-61.0124	-61.5127	-61.888	-62.4197	-62.7637	-63.0451
19.74	-0.00238121	-0.00531741	-0.00606536	-0.00678024	-0.00740908	-0.0079762	-0.00844506	-0.00882043	-0.00912001	-0.00937877	-0.0095417	-0.00966962		-69.9875	-58.4793	-58.792	-59.3549	-59.7301	-60.3869	-61.0123	-61.4814	-61.7003	-62.4195	-62.6698	-62.9825
19.76	-0.00238237	-0.00533055	-0.00608519	-0.00679242	-0.00742368	-0.00798886	-0.00845586	-0.00882109	-0.00913774	-0.00938549	-0.00954771	-0.0096748		-70.0188	-58.4168	-58.8858	-59.3237	-59.7615	-60.4182	-61.0436	-61.3876	-61.8567	-62.4509	-62.7011	-63.0138
19.78	-0.00238239	-0.00534651	-0.00609873	-0.0068131	-0.00743817	-0.00800539	-0.00846029	-0.00882856	-0.00914375	-0.00938053	-0.00955363	-0.0096823		-69.9875	-58.4168	-58.8545	-59.4487	-59.7927	-60.5119	-60.9811	-61.3876	-61.8567	-62.3257	-62.7323	-63.0763
19.8	-0.00238299	-0.00536116	-0.00610936	-0.00683005	-0.00745628	-0.00800974	-0.00847537	-0.00883821	-0.00914522	-0.0093898	-0.00955242	-0.00968248		-69.9875	-58.3855	-58.7607	-59.5112	-59.8866	-60.4181	-61.0749	-61.4189	-61.7941	-62.3883	-62.6698	-63.045
19.82	-0.00238415	-0.00537857	-0.00613389	-0.00683835	-0.00746484	-0.00802629	-0.00849229	-0.00884996	-0.00916272	-0.00940122	-0.00956077	-0.00968513		-70.0188	-58.4168	-58.9484	-59.4174	-59.824	-60.512	-61.2	-61.4814	-61.9505	-62.4821	-62.7323	-63.0451
19.84	-0.00238473	-0.00539722	-0.00614725	-0.00685711	-0.00748286	-0.00804257	-0.00849624	-0.00885497	-0.00916167	-0.00940312	-0.0095619	-0.00968062		-70.0188	-58.4793	-58.9171	-59.5113	-59.9178	-60.6058	-61.1375	-61.4502	-61.8567	-62.4509	-62.7011	-62.9513
19.86	-0.00238475	-0.00541039	-0.0061668	-0.0068705	-0.00749689	-0.00805059	-0.00850457	-0.00885786	-0.00917446	-0.0094051	-0.00956782	-0.00969064		-69.9875	-58.4168	-59.0109	-59.5113	-59.949	-60.5745	-61.1375	-61.3876	-61.9505	-62.4196	-62.7323	-63.045
19.88	-0.00238534	-0.00542642	-0.00617845	-0.00688048	-0.00750897	-0.00805871	-0.00850657	-0.00886531	-0.00918247	-0.00940482	-0.00957366	-0.00969328		-69.9875	-58.4168	-58.9484	-59.4487	-59.949	-60.5433	-61.0436	-61.3876	-61.9818	-62.357	-62.7636	-63.045
19.9	-0.00238594	-0.00544379	-0.00618876	-0.00690259	-0.0075136	-0.00807091	-0.00851095	-0.00887495	-0.00919493	-0.00940936	-0.00956997	-0.0096983		-69.9875	-58.448	-58.8545	-59.605	-59.824	-60.5746	-60.9811	-61.4189	-62.0756	-62.3571	-62.6697	-63.0763
19.92	-0.00238653	-0.0054611	-0.00620702	-0.00691399	-0.00752047	-0.00807901	-0.0085176	-0.0088845	-0.00919579	-0.00941389	-0.0095736	-0.00969847		-69.9875	-58.4793	-58.917	-59.5738	-59.7302	-60.5433	-60.9498	-61.4502	-62.0131	-62.3571	-62.6698	-63.045
19.94	-0.00238769	-0.00547563	-0.00622511	-0.00692548	-0.00753696	-0.00809121	-0.00853068	-0.00889396	-0.00920363	-0.00942539	-0.00957959	-0.00970589		-70.0188	-58.448	-58.9796	-59.5425	-59.7928	-60.5746	-61.0124	-61.4815	-62.0444	-62.4509	-62.701	-63.1076
19.96	-0.00238995	-0.00549433	-0.00624302	-0.00694737	-0.00755325	-0.00810131	-0.00854358	-0.00891215	-0.00922048	-0.00943897	-0.00959733	-0.00971076		-70.1126	-58.5106	-59.0422	-59.6989	-59.8553	-60.5746	-61.0749	-61.6378	-62.2007	-62.5759	-62.8887	-63.1389
19.98	-0.00238825	-0.00550878	-0.00624994	-0.00694816	-0.00755998	-0.00810739	-0.00854571	-0.00891227	-0.00921871	-0.00943595	-0.00959804	-0.00971077		-69.9875	-58.4793	-58.8858	-59.48	-59.7614	-60.512	-60.9811	-61.544	-62.1069	-62.4821	-62.8574	-63.1076
20	-0.00238996	-0.00552878	-0.00626507	-0.00696683	-0.00757264	-0.00812772	-0.00855658	-0.00892588	-0.00921945	-0.00943083	-0.00960121	-0.00971804		-70.0501	-58.5731	-58.8859	-59.5739	-59.7615	-60.6684	-61.0124	-61.6378	-62.0444	-62.3571	-62.8575	-63.1702
20.02	-0.00239053	-0.0055417	-0.00628021	-0.00697831	-0.00758529	-0.00813552	-0.00856736	-0.0089304	-0.0092272	-0.00943767	-0.00960199	-0.00971797		-70.0501	-58.5106	-58.8859	-59.5426	-59.7615	-60.6371	-61.0437	-61.6066	-62.0757	-62.3883	-62.8262	-63.1389
20.04	-0.00238997	-0.00555618	-0.00629223	-0.00698988	-0.00759982	-0.0081434	-0.00857167	-0.00892836	-0.00922572	-0.00944443	-0.00960048	-0.00971797		-69.9875	-58.4793	-58.8233	-59.5112	-59.7927	-60.6058	-60.9811	-61.4814	-61.9817	-62.4196	-62.7636	-63.1076
20.06	-0.00239169	-0.00557626	-0.00630914	-0.00699982	-0.00761426	-0.00815945	-0.00857616	-0.00894657	-0.00922906	-0.00945111	-0.00960623	-0.00973003		-70.0501	-58.5731	-58.8546	-59.4488	-59.824	-60.6996	-60.9186	-61.6378	-61.9505	-62.4509	-62.7949	-63.2328
20.08	-0.00239057	-0.00558781	-0.00632126	-0.00701516	-0.00762104	-0.00817119	-0.00858933	-0.00894665	-0.00922564	-0.00945304	-0.00960716	-0.00972741		-69.9563	-58.4793	-58.792	-59.4801	-59.7302	-60.7309	-60.9812	-61.5441	-61.8255	-62.4197	-62.7637	-63.1702
20.1	-0.00239173	-0.00560517	-0.00634611	-0.00702866	-0.00764136	-0.00817878	-0.00860018	-0.0089514	-0.00923395	-0.00945503	-0.00960815	-0.00973212		-69.9875	-58.5106	-58.9796	-59.48	-59.8553	-60.6996	-61.0123	-61.5127	-61.8567	-62.3883	-62.7323	-63.2014
20.12	-0.00239289	-0.00562107	-0.00636414	-0.00704565	-0.00765182	-0.00819255	-0.00860669	-0.00896066	-0.00924446	-0.00946412	-0.00961872	-0.00974156		-70.0188	-58.5106	-59.0422	-59.5426	-59.824	-60.7622	-60.9811	-61.544	-61.9193	-62.4509	-62.8262	-63.2953
20.14	-0.00239403	-0.00563836	-0.00638041	-0.00706071	-0.00766997	-0.0082041	-0.00862395	-0.00897207	-0.00924566	-0.00947539	-0.00961955	-0.00974119		-70.0501	-58.5418	-59.0735	-59.5739	-59.9178	-60.7935	-61.1062	-61.6066	-61.8567	-62.5448	-62.7949	-63.264
20.16	-0.0023929	-0.00565559	-0.00639343	-0.00706693	-0.00768022	-0.00821353	-0.00862804	-0.00897219	-0.00925388	-0.00947706	-0.00961098	-0.00974088		-69.9563	-58.5731	-59.0422	-59.4488	-59.8866	-60.7935	-61.0437	-61.5128	-61.888	-62.5135	-62.6386	-63.2327
20.18	-0.00239463	-0.00566993	-0.00640655	-0.00708931	-0.00770201	-0.00822702	-0.00863443	-0.00898366	-0.00926202	-0.0094788	-0.00961939	-0.00975024		-70.0188	-58.5418	-59.011	-59.6051	-60.0429	-60.856	-61.0124	-61.5752	-61.9193	-62.4822	-62.701	-63.3265
20.2	-0.00239408	-0.00568718	-0.00641818	-0.00709541	-0.00771378	-0.008222	-0.00864519	-0.00898608	-0.0092632	-0.00947828	-0.00962053	-0.00974739		-69.9563	-58.5731	-58.9484	-59.4801	-60.0429	-60.6371	-61.0437	-61.5128	-61.8568	-62.4197	-62.6698	-63.264
20.22	-0.00239637	-0.00570716	-0.00644114	-0.0071142	-0.00773513	-0.00823799	-0.00867301	-0.00899978	-0.00928058	-0.0094943	-0.009636	-0.0097639		-70.0501	-58.6669	-59.1048	-59.5739	-60.1993	-60.7309	-61.3251	-61.6065	-62.0131	-62.576	-62.8262	-63.4517
20.24	-0.00239525	-0.00571984	-0.0064477	-0.00712919	-0.00773876	-0.00824146	-0.00867214	-0.00900432	-0.00928609	-0.00950057	-0.00963206	-0.00974154		-69.9563	-58.6044	-58.9485	-59.6052	-60.0743	-60.6371	-61.2	-61.5753	-62.0132	-62.6073	-62.7324	-63.1389
20.26	-0.00239585	-0.00573978	-0.00646271	-0.00714055	-0.00775619	-0.00825132	-0.00868236	-0.00901117	-0.00929158	-0.00949034	-0.00964738	-0.00974391		-69.9563	-58.6982	-58.9485	-59.5739	-60.1681	-60.6371	-61.2313	-61.5753	-62.0131	-62.4197	-62.8888	-63.1389
20.28	-0.00239701	-0.0057552	-0.00647933	-0.00715554	-0.00777141	-0.0082571	-0.00868604	-0.00901578	-0.00929706	-0.00949933	-0.00965041	-0.00974628		-69.9875	-58.6982	-58.9796	-59.605	-60.2305	-60.5746	-61.1687	-61.544	-62.013	-62.4822	-62.8887	-63.1388
20.3	-0.00239816	-0.00576636	-0.00649586	-0.00716512	-0.00778068	-0.00827124	-0.00869204	-0.00902941	-0.00931636	-0.00950113	-0.00964631	-0.00974866		-70.0188	-58.6044	-59.0109	-59.5425	-60.1993	-60.6371	-61.1375	-61.6378	-62.2007	-62.4509	-62.7949	-63.1389
20.32	-0.00239817	-0.00578351	-0.00650909	-0.00717668	-0.00779004	-0.00828725	-0.00870458	-0.00903384	-0.00931675	-0.00951474	-0.00964958	-0.00974863		-69.9875	-58.6357	-58.9796	-59.5113	-60.168	-60.7309	-61.2	-61.6066	-62.1382	-62.576	-62.7949	-63.1076
20.34	-0.00239932	-0.00580344	-0.00652887	-0.00719544	-0.00780335	-0.00829888	-0.00871695	-0.00904953	-0.00933112	-0.00951863	-0.00966236	-0.00975828		-70.0188	-58.7295	-59.0734	-59.6051	-60.1993	-60.7622	-61.2626	-61.7316	-62.2633	-62.5759	-62.92	-63.2014
20.36	-0.00239877	-0.00581451	-0.00653868	-0.00720322	-0.0078127	-0.00830425	-0.00871619	-0.00905145	-0.00933825	-0.00952254	-0.00966294	-0.00974848		-69.9563	-58.6357	-58.9797	-59.5113	-60.1681	-60.6997	-61.1375	-61.6691	-62.2946	-62.576	-62.8888	-63.0451
20.38	-0.00239937	-0.00583592	-0.00655039	-0.00721665	-0.00782601	-0.00831597	-0.00872008	-0.00905129	-0.00934299	-0.00952174	-0.00966835	-0.00976069		-69.9563	-58.7608	-58.9172	-59.5113	-60.1993	-60.731	-61.0749	-61.5753	-62.2946	-62.5135	-62.9201	-63.1702
20.4	-0.0023994	-0.00585122	-0.00656879	-0.00722471	-0.00784311	-0.00831935	-0.00872848	-0.00905363	-0.00935233	-0.00952813	-0.00967129	-0.00975336		-69.925	-58.7608	-58.9797	-59.4175	-60.2931	-60.6371	-61.0749	-61.5127	-62.3571	-62.5447	-62.92	-63.0451
20.42	-0.00240002	-0.00586796	-0.00658701	-0.0072456	-0.00785605	-0.00832918	-0.00874771	-0.00906286	-0.00934766	-0.0095321	-0.00967424	-0.00976556		-69.925	-58.792	-59.0423	-59.5426	-60.3244	-60.6371	-61.2313	-61.544	-62.232	-62.5447	-62.92	-63.1702
20.44	-0.00240176	-0.00588173	-0.00660341	-0.00726433	-0.00786305	-0.00834935	-0.00876215	-0.00907424	-0.00935948	-0.00954548	-0.00967956	-0.00976303		-69.9875	-58.7608	-59.0735	-59.6364	-60.2618	-60.7934	-61.3251	-61.6065	-62.3258	-62.6698	-62.9512	-63.1076
20.46	-0.00240178	-0.00589996	-0.00662464	-0.00727197	-0.00787414	-0.00835045	-0.00877851	-0.00907423	-0.00936876	-0.00954207	-0.00968005	-0.00977268		-69.9563	-58.8233	-59.1986	-59.5426	-60.2619	-60.6684	-61.4502	-61.5128	-62.3884	-62.5761	-62.9201	-63.2015
20.48	-0.0024035	-0.00591364	-0.00664058	-0.00729071	-0.00789108	-0.00837055	-0.008788	-0.0090947	-0.0093686	-0.00956008	-0.00967821	-0.00976766		-70.0188	-58.792	-59.2299	-59.6364	-60.3557	-60.8248	-61.4814	-61.7004	-62.3258	-62.7636	-62.8575	-63.1076
20.5	-0.00240407	-0.00593181	-0.00665643	-0.00730375	-0.00790383	-0.00837775	-0.00880177	-0.00910115	-0.00937556	-0.00956349	-0.0096789	-0.00978212		-70.0188	-58.8546	-59.2611	-59.6363	-60.3869	-60.7935	-61.5753	-61.7004	-62.3571	-62.7636	-62.8261	-63.2639
20.52	-0.00240465	-0.00594394	-0.00666724	-0.00731498	-0.00791453	-0.00838711	-0.00881963	-0.0091121	-0.00938242	-0.00955983	-0.00968924	-0.00977936		-70.0188	-58.792	-59.1986	-59.6051	-60.3869	-60.7935	-61.7316	-61.7629	-62.3883	-62.6698	-62.92	-63.2014
20.54	-0.00240409	-0.00596214	-0.00668155	-0.00732449	-0.00792327	-0.00839438	-0.00882836	-0.00911161	-0.00937995	-0.00956582	-0.00968262	-0.00977434		-69.9563	-58.8546	-59.1986	-59.5426	-60.3557	-60.7622	-61.7629	-61.6691	-62.2946	-62.7011	-62.795	-63.1076
20.56	-0.00240412	-0.00597574	-0.00669089	-0.00734147	-0.00793799	-0.00839967	-0.00882391	-0.00911362	-0.00938233	-0.00956466	-0.00968823	-0.00977435		-69.925	-58.8233	-59.1048	-59.6052	-60.4182	-60.6997	-61.6066	-61.6065	-62.2633	-62.6386	-62.8262	-63.0764
20.58	-0.00240473	-0.00598797	-0.00670716	-0.00734914	-0.00794269	-0.00841346	-0.00883733	-0.00911581	-0.00938711	-0.00958018	-0.0096866	-0.00977684		-69.925	-58.7608	-59.136	-59.5113	-60.3244	-60.7622	-61.7004	-61.544	-62.2632	-62.7949	-62.7636	-63.0764
20.6	-0.00240647	-0.00600335	-0.00672832	-0.00737901	-0.00796342	-0.00842915	-0.00883519	-0.00913623	-0.00940117	-0.0095764	-0.00969947	-0.00978414		-69.9875	-58.7608	-59.261	-59.7927	-60.4807	-60.856	-61.5752	-61.7316	-62.3883	-62.701	-62.8887	-63.1388
20.62	-0.00240874	-0.00601726	-0.00674912	-0.0073934	-0.00798172	-0.00844876	-0.00884433	-0.00914935	-0.00941259	-0.00958467	-0.00971922	-0.00981061		-70.0813	-58.7295	-59.3861	-59.824	-60.6057	-61.0123	-61.6065	-61.8254	-62.4821	-62.7635	-63.1076	-63.4516
20.64	-0.00240872	-0.00603275	-0.00676121	-0.00741136	-0.00798386	-0.00845328	-0.00885339	-0.0091577	-0.00940288	-0.00958807	-0.00971212	-0.00980981		-70.0501	-58.7295	-59.355	-59.9178	-60.4808	-60.9498	-61.6379	-61.8567	-62.2946	-62.7636	-62.9826	-63.4203
20.66	-0.00240928	-0.00604526	-0.00677338	-0.00741987	-0.00799427	-0.00846636	-0.00886673	-0.00916144	-0.00940989	-0.00958436	-0.00971487	-0.00980426		-70.0501	-58.6669	-59.3237	-59.8553	-60.4808	-61.0124	-61.7316	-61.8255	-62.3259	-62.6698	-62.9825	-63.3266
20.68	-0.00240813	-0.00606396	-0.00678229	-0.00743039	-0.00799872	-0.00847086	-0.0088579	-0.00916524	-0.00940519	-0.00959035	-0.00971524	-0.00979408		-69.9563	-58.7295	-59.2299	-59.824	-60.3869	-60.9499	-61.5128	-61.7942	-62.2008	-62.7011	-62.9513	-63.1702
20.7	-0.00240873	-0.00608098	-0.00680157	-0.00743917	-0.00800543	-0.00848393	-0.00886501	-0.00916687	-0.00941477	-0.00959151	-0.00972047	-0.00979876		-69.9563	-58.7608	-59.3237	-59.7615	-60.3244	-61.0124	-61.5128	-61.7317	-62.2633	-62.6698	-62.9825	-63.2015
20.72	-0.00240989	-0.00609491	-0.0068172	-0.00745736	-0.00801828	-0.00848841	-0.00886771	-0.00917999	-0.0094265	-0.00959749	-0.00972322	-0.00980576		-69.9875	-58.7295	-59.3549	-59.8552	-60.3556	-60.9498	-61.4501	-61.8254	-62.3571	-62.7011	-62.9825	-63.264
20.74	-0.00241103	-0.00611497	-0.00683275	-0.00746418	-0.00803303	-0.00850359	-0.00887938	-0.00917924	-0.009438	-0.00960102	-0.00972838	-0.00980538		-70.0188	-58.8233	-59.3862	-59.7614	-60.4182	-61.0436	-61.5127	-61.7316	-62.4508	-62.7011	-63.0138	-63.2327
20.76	-0.00241047	-0.00613023	-0.00683975	-0.00747314	-0.00803962	-0.00850797	-0.00887328	-0.0091901	-0.00943762	-0.00959981	-0.00972626	-0.0098099		-69.9563	-58.8233	-59.2612	-59.699	-60.3557	-60.9811	-61.3251	-61.7942	-62.3884	-62.6386	-62.9513	-63.264
20.78	-0.00241106	-0.00614549	-0.00686239	-0.00748969	-0.00805836	-0.00851463	-0.0088831	-0.00919852	-0.00943504	-0.00960823	-0.00973628	-0.00981435		-69.9563	-58.8233	-59.4175	-59.7615	-60.4807	-60.9499	-61.3564	-61.8255	-62.2945	-62.7011	-63.0451	-63.2953
20.8	-0.00241335	-0.00616076	-0.00688457	-0.00751351	-0.00806874	-0.00853615	-0.00889943	-0.00920684	-0.00945137	-0.00961412	-0.00974368	-0.00983565		-70.0501	-58.8233	-59.5738	-59.9492	-60.4807	-61.1375	-61.4815	-61.8567	-62.4509	-62.7324	-63.1076	-63.5454
20.82	-0.00241334	-0.00618214	-0.00688924	-0.00751813	-0.00808112	-0.00854869	-0.00890659	-0.00921964	-0.00945796	-0.00961756	-0.00974132	-0.00983461		-70.0188	-58.9484	-59.4174	-59.824	-60.512	-61.2	-61.4814	-61.9505	-62.4821	-62.7323	-63.0451	-63.5141
20.84	-0.0024139	-0.00619552	-0.00690805	-0.00753618	-0.00809742	-0.00855259	-0.00891155	-0.0092185	-0.00945981	-0.00961863	-0.00973671	-0.00983365		-70.0188	-58.9171	-59.5113	-59.9178	-60.6058	-61.1375	-61.4502	-61.8567	-62.4509	-62.7011	-62.9513	-63.4828
20.86	-0.00241333	-0.00621359	-0.00691973	-0.00754835	-0.00810341	-0.00855878	-0.00891217	-0.00922902	-0.00945939	-0.00962214	-0.00974433	-0.00983033		-69.9563	-58.9797	-59.4801	-59.9178	-60.5433	-61.1063	-61.3564	-61.9193	-62.3884	-62.7011	-63.0138	-63.4203
20.88	-0.00241449	-0.00622687	-0.0069315	-0.00756239	-0.0081136	-0.00856292	-0.00892188	-0.00923937	-0.00946146	-0.00963039	-0.00974939	-0.009832		-69.9875	-58.9484	-59.4487	-59.949	-60.5433	-61.0436	-61.3876	-61.9818	-62.357	-62.7636	-63.045	-63.4203
20.9	-0.0024145	-0.00623563	-0.00695197	-0.00756509	-0.00812379	-0.00856512	-0.0089293	-0.00924955	-0.00946362	-0.00962424	-0.00975198	-0.00981673		-69.9563	-58.8233	-59.5738	-59.7928	-60.5434	-60.9499	-61.3877	-62.0444	-62.3259	-62.6385	-63.0451	-63.2015
20.92	-0.00241509	-0.00625404	-0.00696345	-0.00757202	-0.00813195	-0.00857183	-0.00893892	-0.00925042	-0.00946818	-0.00962791	-0.00975216	-0.00981889		-69.9563	-58.8858	-59.5426	-59.699	-60.5121	-60.9186	-61.419	-61.9819	-62.3259	-62.6386	-63.0138	-63.2014
20.94	-0.00241568	-0.00627072	-0.0069733	-0.00758675	-0.00814222	-0.00858287	-0.00894623	-0.00925603	-0.00947741	-0.00963155	-0.00975722	-0.0098259		-69.9563	-58.9171	-59.48	-59.7303	-60.5121	-60.9499	-61.419	-61.9819	-62.3884	-62.6385	-63.0451	-63.264
20.96	-0.00241684	-0.00628575	-0.00699199	-0.00759949	-0.00814845	-0.00859169	-0.00896019	-0.00926849	-0.00948648	-0.00964472	-0.00975739	-0.00982065		-69.9875	-58.9171	-59.5738	-59.7302	-60.4495	-60.9498	-61.5127	-62.0756	-62.4508	-62.7636	-63.0138	-63.1701
20.98	-0.00241741	-0.00629924	-0.00700001	-0.00761412	-0.00816294	-0.00860264	-0.00896945	-0.00927613	-0.00949306	-0.0096552	-0.00976726	-0.00982046		-69.9875	-58.8858	-59.48	-59.7614	-60.512	-60.9811	-61.544	-62.1069	-62.4821	-62.8574	-63.1076	-63.1388
21	-0.00241799	-0.00631128	-0.00701524	-0.00762299	-0.00817927	-0.00860923	-0.00897862	-0.00927221	-0.00948315	-0.00965355	-0.00976968	-0.00981309		-69.9875	-58.8233	-59.5113	-59.6989	-60.6058	-60.9498	-61.5752	-61.9818	-62.2945	-62.7949	-63.1076	-63.0137
21.02	-0.00241913	-0.00632819	-0.00702865	-0.00763773	-0.00818925	-0.00862231	-0.00898549	-0.00928239	-0.00949246	-0.00965681	-0.00977211	-0.00982538		-70.0188	-58.8546	-59.5113	-59.7302	-60.6058	-61.0124	-61.5753	-62.0444	-62.357	-62.7949	-63.1076	-63.1389
21.04	-0.00241969	-0.00634345	-0.0070438	-0.00765616	-0.00820126	-0.00863093	-0.0089879	-0.00928551	-0.00950397	-0.00966006	-0.00977694	-0.00982768		-70.0188	-58.8546	-59.5425	-59.824	-60.6371	-61.0124	-61.5127	-62.013	-62.4509	-62.7949	-63.1389	-63.1389
21.06	-0.00242026	-0.00635715	-0.00705013	-0.00766671	-0.00821317	-0.008631	-0.00900161	-0.00928411	-0.00950583	-0.00966093	-0.00978411	-0.0098324		-70.0188	-58.8233	-59.4175	-59.7927	-60.6683	-60.8873	-61.6065	-61.9192	-62.4196	-62.7636	-63.2015	-63.1702
21.08	-0.00241968	-0.00637094	-0.00706734	-0.00767545	-0.00822703	-0.00864641	-0.00900393	-0.00928298	-0.00951014	-0.00966426	-0.00978389	-0.00982735		-69.9563	-58.792	-59.4801	-59.7302	-60.7309	-60.9812	-61.5441	-61.8255	-62.4197	-62.7637	-63.1702	-63.0764
21.1	-0.00242027	-0.00639432	-0.00707909	-0.00769392	-0.00823255	-0.0086551	-0.0090064	-0.00928897	-0.00950972	-0.00966281	-0.00978616	-0.00983949		-69.9563	-58.9484	-59.4488	-59.8241	-60.6684	-60.9811	-61.4815	-61.8255	-62.3571	-62.7011	-63.1702	-63.2015
21.12	-0.00242142	-0.00641248	-0.00709621	-0.00770445	-0.00824641	-0.00866166	-0.00901572	-0.00929955	-0.00951887	-0.00967344	-0.00979565	-0.00983678		-69.9875	-59.0109	-59.5113	-59.7927	-60.7309	-60.9498	-61.5127	-61.888	-62.4196	-62.7949	-63.264	-63.1389
21.14	-0.00242199	-0.00642728	-0.00710963	-0.00772082	-0.008256	-0.00867689	-0.00902497	-0.00929846	-0.00952786	-0.0096719	-0.00979287	-0.00984392		-69.9875	-59.0109	-59.5113	-59.8552	-60.7309	-61.0436	-61.544	-61.7941	-62.4822	-62.7323	-63.2014	-63.2014
21.16	-0.00242143	-0.0064421	-0.00711776	-0.00773317	-0.00826764	-0.00868325	-0.00902742	-0.00930913	-0.00953198	-0.00966575	-0.00979506	-0.00984849		-69.925	-59.0109	-59.4175	-59.8553	-60.7622	-61.0124	-61.4815	-61.8567	-62.4822	-62.6073	-63.2014	-63.2327
21.18	-0.00242317	-0.00645532	-0.0071403	-0.00775512	-0.00828123	-0.00868969	-0.00903898	-0.00931733	-0.00953374	-0.00967421	-0.00980448	-0.00985297		-69.9875	-58.9797	-59.5738	-60.0116	-60.8247	-60.9811	-61.5439	-61.888	-62.4509	-62.6697	-63.2952	-63.2639
21.2	-0.00242431	-0.00647184	-0.00715176	-0.00777275	-0.00828233	-0.008707	-0.00904814	-0.00932544	-0.00954029	-0.00968254	-0.00980886	-0.00985497		-70.0188	-59.0109	-59.5426	-60.1054	-60.6996	-61.1062	-61.5753	-61.9193	-62.4822	-62.7323	-63.3265	-63.264
21.22	-0.00242544	-0.00649149	-0.00716686	-0.00779011	-0.00829406	-0.00873043	-0.00905719	-0.00933808	-0.00955147	-0.0096931	-0.00982043	-0.00986181		-70.0501	-59.1048	-59.5739	-60.1993	-60.7309	-61.3251	-61.6065	-62.0131	-62.576	-62.8262	-63.4517	-63.3265
21.24	-0.00242484	-0.0064996	-0.00718364	-0.0077956	-0.00829951	-0.00873163	-0.00906392	-0.00934585	-0.00956006	-0.00969146	-0.00980028	-0.00986365		-69.9875	-58.9797	-59.6364	-60.1055	-60.6683	-61.2312	-61.6065	-62.0444	-62.6385	-62.7636	-63.1701	-63.3265
21.26	-0.00242541	-0.00651454	-0.00719489	-0.00781297	-0.00830927	-0.00874175	-0.00907065	-0.00935121	-0.00954962	-0.00970672	-0.00980253	-0.00986306		-69.9875	-58.9797	-59.6051	-60.1993	-60.6683	-61.2625	-61.6065	-62.0443	-62.4509	-62.92	-63.1701	-63.2952
21.28	-0.00242655	-0.00653109	-0.00720981	-0.00782813	-0.00831491	-0.00874528	-0.00907513	-0.00935658	-0.00955852	-0.00970964	-0.00980478	-0.00986497		-70.0188	-59.0109	-59.6363	-60.2618	-60.6059	-61.2	-61.5753	-62.0443	-62.5135	-62.92	-63.1701	-63.2952
21.3	-0.00242711	-0.00654594	-0.00721748	-0.00783534	-0.0083269	-0.00874898	-0.00908643	-0.00937352	-0.00955782	-0.00970297	-0.00980462	-0.00986931		-70.0188	-59.0109	-59.5425	-60.1993	-60.6371	-61.1375	-61.6378	-62.2007	-62.4509	-62.7949	-63.1389	-63.3265
21.32	-0.00242767	-0.0065608	-0.00723082	-0.00784661	-0.008345	-0.00876369	-0.00909306	-0.00937616	-0.0095738	-0.00970858	-0.00980694	-0.00986629		-70.0188	-59.0109	-59.5426	-60.1993	-60.7622	-61.2313	-61.6379	-62.1695	-62.6073	-62.8262	-63.1389	-63.264
21.34	-0.00242708	-0.00657566	-0.00724415	-0.007854	-0.00835033	-0.00876946	-0.00910193	-0.0093835	-0.00957049	-0.00971411	-0.00980926	-0.00986098		-69.9563	-59.0109	-59.5426	-60.1368	-60.6997	-61.2001	-61.6691	-62.2008	-62.5134	-62.8575	-63.1389	-63.1702
21.36	-0.00242938	-0.00659379	-0.00726107	-0.00787326	-0.00836619	-0.00877965	-0.00911522	-0.00940237	-0.00958632	-0.00972676	-0.00981157	-0.00987047		-70.0501	-59.0735	-59.6051	-60.2619	-60.7935	-61.2313	-61.7629	-62.3884	-62.6698	-62.9826	-63.1389	-63.264
21.38	-0.00243049	-0.00660683	-0.00727601	-0.00788824	-0.0083797	-0.00878539	-0.00911698	-0.00940914	-0.00958757	-0.0097343	-0.00982597	-0.0098773		-70.0813	-59.0422	-59.6363	-60.3243	-60.856	-61.1999	-61.7003	-62.4196	-62.6385	-63.0451	-63.2952	-63.3265
21.4	-0.00242817	-0.00661833	-0.00727643	-0.00789717	-0.00837434	-0.0087847	-0.00910988	-0.00940886	-0.00958416	-0.00972731	-0.00980858	-0.00986211		-69.925	-58.9797	-59.4175	-60.2931	-60.6371	-61.0749	-61.5127	-62.3571	-62.5447	-62.92	-63.0451	-63.1076
21.42	-0.0024299	-0.00663988	-0.007301	-0.00791403	-0.00838831	-0.00880832	-0.00912361	-0.00940874	-0.00959281	-0.009735	-0.00982562	-0.00987174		-69.9875	-59.1048	-59.6051	-60.3869	-60.6996	-61.2938	-61.6065	-62.2945	-62.6072	-62.9825	-63.2327	-63.2014
21.44	-0.00243047	-0.00665282	-0.00731595	-0.00791688	-0.00840419	-0.00881824	-0.0091303	-0.00941575	-0.00960131	-0.00973534	-0.00981803	-0.00986656		-69.9875	-59.0735	-59.6364	-60.2618	-60.7934	-61.3251	-61.6065	-62.3258	-62.6698	-62.9512	-63.1076	-63.1076
21.46	-0.00243047	-0.00667412	-0.00732355	-0.00792796	-0.00840521	-0.00883463	-0.00913021	-0.00942501	-0.00959781	-0.00973577	-0.00982767	-0.00986889		-69.9563	-59.1986	-59.5426	-60.2619	-60.6684	-61.4502	-61.5128	-62.3884	-62.5761	-62.9201	-63.2015	-63.1076
21.48	-0.00243162	-0.00668843	-0.00734052	-0.00794296	-0.00842327	-0.00884191	-0.00914846	-0.00942245	-0.00961349	-0.00973145	-0.00982014	-0.00986879		-69.9875	-59.1986	-59.6051	-60.3244	-60.7935	-61.4501	-61.6691	-62.2945	-62.7323	-62.8262	-63.0763	-63.0763
21.5	-0.00243219	-0.00670439	-0.00735365	-0.00795581	-0.00843052	-0.00885577	-0.00915496	-0.00942946	-0.00961693	-0.00973215	-0.00983469	-0.00986876		-69.9875	-59.2298	-59.605	-60.3556	-60.7622	-61.544	-61.6691	-62.3258	-62.7323	-62.7948	-63.2326	-63.045
21.52	-0.00243275	-0.00671529	-0.00736497	-0.00796659	-0.00843995	-0.00887376	-0.00916599	-0.00943637	-0.00961325	-0.00974255	-0.00983192	-0.00986881		-69.9875	-59.1673	-59.5738	-60.3556	-60.7622	-61.7003	-61.7316	-62.357	-62.6385	-62.8887	-63.1701	-63.0138
21.54	-0.00243332	-0.00673304	-0.00737821	-0.00797934	-0.00845147	-0.00888694	-0.00917004	-0.00943855	-0.00962404	-0.00974071	-0.00983172	-0.00987379		-69.9875	-59.2298	-59.5738	-60.3869	-60.7934	-61.7941	-61.7003	-62.3258	-62.7323	-62.8262	-63.1388	-63.045
21.56	-0.00243388	-0.00674393	-0.00739695	-0.00799597	-0.00845871	-0.00888449	-0.00917417	-0.00944313	-0.0096251	-0.00974862	-0.00983402	-0.0098787		-69.9875	-59.1673	-59.6677	-60.4807	-60.7622	-61.6691	-61.669	-62.3258	-62.7011	-62.8887	-63.1389	-63.0763
21.58	-0.00243502	-0.0067617	-0.00740622	-0.0080024	-0.00847442	-0.00889996	-0.00917839	-0.00945004	-0.00964286	-0.00974916	-0.00983874	-0.00988109		-70.0188	-59.2298	-59.6051	-60.4182	-60.856	-61.7942	-61.6378	-62.357	-62.8887	-62.8574	-63.1702	-63.0763
21.6	-0.00243443	-0.00677593	-0.00742856	-0.00801498	-0.00848146	-0.00888868	-0.00918951	-0.00945454	-0.00962927	-0.0097522	-0.00983611	-0.00987619		-69.9563	-59.2298	-59.7615	-60.4495	-60.8248	-61.544	-61.7004	-62.3571	-62.6698	-62.8575	-63.1076	-62.9826
21.62	-0.00243501	-0.00679185	-0.00743753	-0.00802745	-0.0084949	-0.00889129	-0.0091959	-0.00945903	-0.00963047	-0.00976485	-0.00985545	-0.00987393		-69.9563	-59.2611	-59.699	-60.4807	-60.8873	-61.4815	-61.7004	-62.3571	-62.6385	-62.9826	-63.3266	-62.92
21.64	-0.00243616	-0.00680768	-0.00745961	-0.00803386	-0.00850393	-0.00890506	-0.00920911	-0.00945417	-0.00963887	-0.00976274	-0.00985971	-0.00986452		-69.9875	-59.2924	-59.8552	-60.4182	-60.8872	-61.5753	-61.7941	-62.232	-62.701	-62.92	-63.3577	-62.7636
21.66	-0.00243787	-0.00682342	-0.00747198	-0.00804843	-0.00852141	-0.00892299	-0.00921753	-0.009466	-0.00963999	-0.00977042	-0.00985907	-0.00988473		-70.0501	-59.3237	-59.8553	-60.4808	-61.0124	-61.7316	-61.8255	-62.3259	-62.6698	-62.9825	-63.3266	-62.9826
21.68	-0.00243726	-0.00683399	-0.00748434	-0.00805481	-0.00852797	-0.00891623	-0.00922356	-0.00946353	-0.00964832	-0.00977313	-0.0098512	-0.00988733		-69.9875	-59.2611	-59.8552	-60.4181	-60.9811	-61.544	-61.8254	-62.232	-62.7323	-62.9825	-63.2014	-62.9825
21.7	-0.00243725	-0.00685154	-0.00749114	-0.0080594	-0.00853884	-0.00892102	-0.00922275	-0.00947068	-0.00964697	-0.00977584	-0.00985334	-0.00987775		-69.9563	-59.3237	-59.7615	-60.3244	-61.0124	-61.5128	-61.7317	-62.2633	-62.6698	-62.9825	-63.2015	-62.8262
21.72	-0.00243783	-0.0068655	-0.00750751	-0.00807024	-0.00854116	-0.00892145	-0.0092336	-0.00948008	-0.00965054	-0.00977614	-0.0098579	-0.00988074		-69.9563	-59.3237	-59.824	-60.3244	-60.9186	-61.4189	-61.7942	-62.3259	-62.6699	-62.9513	-63.2328	-62.8262
21.74	-0.00243898	-0.00688116	-0.00751438	-0.00808509	-0.00855644	-0.0089332	-0.00923285	-0.00949164	-0.0096541	-0.00978133	-0.00985752	-0.00988859		-69.9875	-59.3549	-59.7301	-60.3869	-61.0123	-61.4814	-61.7003	-62.4195	-62.6698	-62.9825	-63.2014	-62.8887
21.76	-0.00244011	-0.00689333	-0.007529	-0.00809776	-0.00856722	-0.00893371	-0.00925065	-0.0094983	-0.00966004	-0.00978644	-0.00986937	-0.00989874		-70.0188	-59.3237	-59.7615	-60.4182	-61.0436	-61.3876	-61.8567	-62.4509	-62.7011	-63.0138	-63.3265	-62.9825
21.78	-0.00243952	-0.00691243	-0.00754165	-0.00811233	-0.00856942	-0.0089389	-0.0092543	-0.00949079	-0.00966352	-0.00979148	-0.00986878	-0.00989646		-69.9563	-59.4175	-59.7615	-60.4807	-60.9499	-61.3564	-61.8255	-62.2945	-62.7011	-63.0451	-63.2953	-62.92
21.8	-0.00243952	-0.00692782	-0.00755805	-0.00811465	-0.00858249	-0.00894639	-0.00925343	-0.00949776	-0.00965984	-0.0097892	-0.0098804	-0.0098992		-69.925	-59.4487	-59.8241	-60.3556	-61.0124	-61.3564	-61.7316	-62.3258	-62.6073	-62.9825	-63.4203	-62.92
21.82	-0.00244068	-0.00693626	-0.00756675	-0.00813144	-0.00859965	-0.00895831	-0.00927116	-0.00950934	-0.00966831	-0.0097919	-0.00988445	-0.00990927		-69.9563	-59.3549	-59.7615	-60.4495	-61.1375	-61.4189	-61.888	-62.4196	-62.6698	-62.9826	-63.4516	-63.0138
21.84	-0.00244068	-0.00695358	-0.00758316	-0.00814593	-0.00860154	-0.00896118	-0.00926782	-0.00950894	-0.00966708	-0.00978494	-0.00988112	-0.00990446		-69.925	-59.4175	-59.824	-60.512	-61.0437	-61.3564	-61.7629	-62.3571	-62.6073	-62.8575	-63.389	-62.92
21.86	-0.00244299	-0.00697417	-0.00760502	-0.00816226	-0.00861862	-0.00897309	-0.00929006	-0.00952043	-0.00968272	-0.00980483	-0.00989011	-0.00990964		-70.0188	-59.5426	-59.9803	-60.6058	-61.1688	-61.4189	-61.9818	-62.4509	-62.7636	-63.0763	-63.4828	-62.9513
21.88	-0.00244354	-0.00698402	-0.007617	-0.00817022	-0.00862039	-0.00898039	-0.00929794	-0.00951993	-0.00968842	-0.00980729	-0.00988915	-0.00990741		-70.0188	-59.48	-59.9803	-60.5746	-61.0749	-61.4189	-62.0131	-62.3883	-62.7949	-63.0763	-63.4516	-62.8887
21.9	-0.00244294	-0.00700271	-0.00761764	-0.00817827	-0.0086203	-0.00898546	-0.00930572	-0.0095196	-0.00967969	-0.00980734	-0.00987123	-0.00990778		-69.9563	-59.5738	-59.7928	-60.5434	-60.9499	-61.3877	-62.0444	-62.3259	-62.6385	-63.0451	-63.2015	-62.8575
21.92	-0.00244408	-0.00701592	-0.00762641	-0.00818843	-0.0086291	-0.00899728	-0.00930882	-0.00952646	-0.00968569	-0.00980987	-0.00987576	-0.00991799		-69.9875	-59.5738	-59.7302	-60.5433	-60.9498	-61.4502	-62.0131	-62.3571	-62.6698	-63.045	-63.2326	-62.9512
21.94	-0.00244579	-0.00702914	-0.00764484	-0.00820266	-0.00864432	-0.00900894	-0.00931891	-0.00954032	-0.009694	-0.00981966	-0.00988755	-0.00992065		-70.0501	-59.5738	-59.8241	-60.6059	-61.0437	-61.5128	-62.0757	-62.4822	-62.7323	-63.1389	-63.3578	-62.9513
21.96	-0.00244575	-0.0070441	-0.00765349	-0.00820449	-0.00864856	-0.00901818	-0.00932652	-0.00954442	-0.00970217	-0.00981471	-0.00987712	-0.00992819		-70.0188	-59.6051	-59.7615	-60.4808	-60.9811	-61.544	-62.1069	-62.4821	-62.7949	-63.0451	-63.2014	-63.0138
21.98	-0.00244687	-0.00705373	-0.00766994	-0.00822094	-0.00866155	-0.00902958	-0.00933636	-0.00955325	-0.00971496	-0.00982692	-0.00987923	-0.0099258		-70.0501	-59.5426	-59.824	-60.5746	-61.0437	-61.6066	-62.1695	-62.5447	-62.92	-63.1702	-63.2014	-62.9513
22	-0.00244625	-0.0070653	-0.00767477	-0.00823303	-0.00866362	-0.00903408	-0.00932757	-0.00953833	-0.00970829	-0.0098243	-0.00986674	-0.00992109		-69.9875	-59.5113	-59.6989	-60.6058	-60.9498	-61.5752	-61.9818	-62.2945	-62.7949	-63.1076	-63.0137	-62.8574
22.02	-0.00244681	-0.00707696	-0.00768761	-0.00824095	-0.00867456	-0.00903868	-0.00933543	-0.00954527	-0.0097091	-0.00982425	-0.00987659	-0.00993131		-69.9875	-59.48	-59.6989	-60.5745	-60.9811	-61.544	-62.0131	-62.3257	-62.7636	-63.0763	-63.1076	-62.9512
22.04	-0.00244679	-0.00709047	-0.00770428	-0.008251	-0.0086811	-0.00903888	-0.00933626	-0.0095545	-0.00970999	-0.0098267	-0.00987649	-0.00991927		-69.9563	-59.48	-59.7615	-60.5746	-60.9499	-61.4502	-61.9505	-62.3884	-62.7324	-63.0764	-63.0764	-62.7637
22.06	-0.00244966	-0.00710398	-0.00772265	-0.00827128	-0.00868987	-0.00906172	-0.00934419	-0.00956591	-0.00972053	-0.00984368	-0.00989106	-0.00992726		-70.0813	-59.48	-59.8552	-60.7308	-60.9498	-61.669	-61.9817	-62.4821	-62.8261	-63.264	-63.2327	-62.8262
22.08	-0.00244903	-0.00712102	-0.00773117	-0.00828497	-0.00870512	-0.00906381	-0.0093428	-0.00957	-0.00972366	-0.00984325	-0.00988578	-0.00992775		-70.0188	-59.5426	-59.7927	-60.7934	-61.0437	-61.6066	-61.888	-62.4822	-62.8262	-63.2327	-63.1389	-62.7949
22.1	-0.00245015	-0.00713434	-0.0077514	-0.00829231	-0.00871577	-0.00906829	-0.0093509	-0.00957172	-0.00972439	-0.00984775	-0.00990021	-0.00993077		-70.0501	-59.5426	-59.9179	-60.7622	-61.0749	-61.5753	-61.9193	-62.4509	-62.7949	-63.264	-63.2953	-62.7949
22.12	-0.0024501	-0.00714767	-0.00775777	-0.0083018	-0.00871769	-0.00907285	-0.0093566	-0.00957589	-0.00972998	-0.00985217	-0.00989233	-0.00993133		-70.0188	-59.5426	-59.824	-60.7622	-60.9811	-61.544	-61.9193	-62.4509	-62.8262	-63.2953	-63.1702	-62.7636
22.14	-0.00245007	-0.00715922	-0.00777214	-0.00830922	-0.00873068	-0.00907974	-0.00935302	-0.00958242	-0.00972589	-0.00984681	-0.00989693	-0.00992706		-69.9875	-59.5113	-59.8552	-60.7309	-61.0436	-61.544	-61.7941	-62.4822	-62.7323	-63.2014	-63.2014	-62.6697
22.16	-0.0024512	-0.00717264	-0.00779028	-0.00832703	-0.0087435	-0.00908887	-0.00937064	-0.00959359	-0.00972684	-0.00985622	-0.00990878	-0.00993285		-70.0188	-59.5113	-59.9491	-60.856	-61.1062	-61.5753	-61.9505	-62.576	-62.7011	-63.2952	-63.3265	-62.7011
22.18	-0.00245117	-0.00718962	-0.00780619	-0.00833417	-0.00874313	-0.00909341	-0.0093716	-0.00958796	-0.00972785	-0.00985814	-0.0099057	-0.00993118		-69.9875	-59.5738	-60.0116	-60.8247	-60.9811	-61.5439	-61.888	-62.4509	-62.6697	-63.2952	-63.2639	-62.6385
22.2	-0.00245345	-0.00720463	-0.00782773	-0.00833932	-0.0087648	-0.00910705	-0.00938432	-0.00959921	-0.00974096	-0.00986734	-0.00991252	-0.00994193		-70.0813	-59.6051	-60.1679	-60.7621	-61.1687	-61.6378	-61.9818	-62.5447	-62.7948	-63.389	-63.3265	-62.7323
22.22	-0.00245281	-0.0072142	-0.00783911	-0.00834465	-0.0087816	-0.00910915	-0.00938983	-0.00960312	-0.00974415	-0.00987148	-0.00991187	-0.00993037		-70.0188	-59.5426	-60.168	-60.6996	-61.2938	-61.5752	-61.9818	-62.5447	-62.7949	-63.4204	-63.2952	-62.5447
22.24	-0.00245278	-0.00723289	-0.00784659	-0.00835223	-0.008785	-0.00911819	-0.00939999	-0.00961414	-0.00974492	-0.00985366	-0.00991618	-0.00993399		-69.9875	-59.6364	-60.1055	-60.6683	-61.2312	-61.6065	-62.0444	-62.6385	-62.7636	-63.1701	-63.3265	-62.5446
22.26	-0.00245333	-0.00724414	-0.00786399	-0.00836196	-0.0087951	-0.00912489	-0.00940531	-0.00960358	-0.0097602	-0.00985587	-0.00991553	-0.0099229		-69.9875	-59.6051	-60.1993	-60.6683	-61.2625	-61.6065	-62.0443	-62.4509	-62.92	-63.1701	-63.2952	-62.357
22.28	-0.00245331	-0.00725548	-0.00787526	-0.00836341	-0.00879422	-0.0091248	-0.00940599	-0.00960772	-0.00975826	-0.00985321	-0.00991251	-0.00992702		-69.9563	-59.5738	-60.1993	-60.5434	-61.1375	-61.5128	-61.9818	-62.451	-62.8575	-63.1076	-63.2327	-62.3571
22.3	-0.00245388	-0.00726331	-0.00788263	-0.00837558	-0.00879805	-0.00913627	-0.00942312	-0.0096071	-0.00975165	-0.00985314	-0.00991696	-0.00992132		-69.9563	-59.48	-60.1368	-60.5746	-61.075	-61.5753	-62.1382	-62.3884	-62.7324	-63.0764	-63.264	-62.232
22.32	-0.00245502	-0.00727865	-0.00789603	-0.00839598	-0.00881513	-0.0091453	-0.00942819	-0.00962564	-0.00975978	-0.00985798	-0.00991644	-0.00992575		-69.9875	-59.5113	-60.168	-60.7309	-61.2	-61.6066	-62.1382	-62.576	-62.7949	-63.1076	-63.2327	-62.2319
22.34	-0.00245499	-0.00729388	-0.00790544	-0.00840344	-0.00882314	-0.0091565	-0.00943793	-0.0096247	-0.00976777	-0.00986275	-0.00991356	-0.00991792		-69.9563	-59.5426	-60.1368	-60.6997	-61.2001	-61.6691	-62.2008	-62.5134	-62.8575	-63.1389	-63.1702	-62.0756
22.36	-0.00245729	-0.00731084	-0.00792474	-0.00841932	-0.00883331	-0.0091698	-0.00945683	-0.00964055	-0.00978042	-0.00986502	-0.00992304	-0.00992524		-70.0501	-59.6051	-60.2619	-60.7935	-61.2313	-61.7629	-62.3884	-62.6698	-62.9826	-63.1389	-63.264	-62.107
22.38	-0.00245782	-0.00732398	-0.00793777	-0.00843075	-0.00883682	-0.00916923	-0.00946124	-0.00963937	-0.00978554	-0.00987701	-0.00992741	-0.00992509		-70.0501	-59.6051	-60.2931	-60.8248	-61.1687	-61.6691	-62.3884	-62.6073	-63.0139	-63.264	-63.2953	-62.0444
22.4	-0.00245834	-0.00733348	-0.00795663	-0.00843581	-0.00884709	-0.00917344	-0.00947266	-0.00964785	-0.00979057	-0.00987168	-0.00992436	-0.00992511		-70.0501	-59.5426	-60.4182	-60.7622	-61.2	-61.6378	-62.4822	-62.6698	-63.0451	-63.1702	-63.2327	-61.9819
22.42	-0.00245944	-0.00735592	-0.00797117	-0.00844733	-0.00886823	-0.00918456	-0.00946981	-0.00965378	-0.00979552	-0.00988603	-0.00993125	-0.00992774		-70.0813	-59.6989	-60.4807	-60.7934	-61.3876	-61.7003	-62.3883	-62.701	-63.0763	-63.3265	-63.2952	-61.9505
22.44	-0.00245822	-0.00736512	-0.00796775	-0.00845666	-0.00887128	-0.00918413	-0.00946953	-0.00965489	-0.00978834	-0.00987081	-0.00991842	-0.0099231		-69.9875	-59.6364	-60.2618	-60.7934	-61.3251	-61.6065	-62.3258	-62.6698	-62.9512	-63.1076	-63.1076	-61.8254
22.46	-0.00245935	-0.00737634	-0.00798276	-0.0084618	-0.00889209	-0.00918851	-0.00948345	-0.00965607	-0.00979353	-0.00988532	-0.0099256	-0.00992125		-70.0188	-59.6051	-60.3244	-60.7309	-61.5127	-61.5753	-62.4509	-62.6386	-62.9826	-63.264	-63.1701	-61.7316
22.48	-0.00246047	-0.00739314	-0.0079976	-0.00847972	-0.00889917	-0.00920663	-0.00948066	-0.00967162	-0.00978898	-0.00987754	-0.00992529	-0.00993197		-70.0501	-59.6677	-60.387	-60.8561	-61.5127	-61.7317	-62.3571	-62.7949	-62.8888	-63.1389	-63.1389	-61.7942
22.5	-0.00245925	-0.00740058	-0.00800431	-0.00848045	-0.00890626	-0.00920609	-0.00948045	-0.0096677	-0.00978223	-0.00988466	-0.00991772	-0.00992528		-69.9563	-59.5738	-60.3244	-60.731	-61.5128	-61.6379	-62.2946	-62.7011	-62.7636	-63.2014	-63.0138	-61.6378
22.52	-0.00246097	-0.00741566	-0.00801914	-0.00849415	-0.00892878	-0.00922176	-0.0094921	-0.00966879	-0.00979753	-0.00988676	-0.00992267	-0.00994857		-70.0188	-59.6051	-60.3869	-60.7935	-61.7316	-61.7629	-62.3883	-62.6698	-62.92	-63.2014	-63.0451	-61.8567
22.54	-0.00246151	-0.00742881	-0.0080318	-0.00850557	-0.00894188	-0.00922567	-0.00949415	-0.00967949	-0.00979554	-0.00988642	-0.00992754	-0.00994661		-70.0188	-59.6051	-60.4182	-60.8247	-61.8254	-61.7316	-62.3571	-62.7636	-62.8575	-63.1701	-63.0763	-61.7629
22.56	-0.00246147	-0.00744564	-0.00804636	-0.00851057	-0.00893705	-0.00922739	-0.00949626	-0.00967803	-0.00980093	-0.00988616	-0.00992989	-0.00995475		-69.9875	-59.6677	-60.4807	-60.7622	-61.6691	-61.669	-62.3258	-62.7011	-62.8887	-63.1389	-63.0763	-61.7941
22.58	-0.00246259	-0.00745489	-0.00805276	-0.0085263	-0.00895254	-0.00923156	-0.00950314	-0.00969583	-0.00980142	-0.00989085	-0.00993224	-0.00996035		-70.0188	-59.6051	-60.4182	-60.856	-61.7942	-61.6378	-62.357	-62.8887	-62.8574	-63.1702	-63.0763	-61.7941
22.6	-0.00246255	-0.00747914	-0.00806732	-0.00853542	-0.00894333	-0.00924495	-0.00950994	-0.00968447	-0.00980682	-0.00989057	-0.00992969	-0.00996594		-69.9875	-59.7927	-60.4807	-60.856	-61.5752	-61.7316	-62.3883	-62.701	-62.8887	-63.1388	-63.0138	-61.7941
22.62	-0.0024631	-0.00748799	-0.0080797	-0.00854877	-0.00894579	-0.00925122	-0.00951431	-0.00968554	-0.0098194	-0.00990988	-0.00992728	-0.009974		-69.9875	-59.7302	-60.5119	-60.9185	-61.5127	-61.7316	-62.3883	-62.6697	-63.0138	-63.3578	-62.9512	-61.8254
22.64	-0.00246307	-0.00750631	-0.00808199	-0.00855346	-0.00895507	-0.00925978	-0.00950458	-0.00968908	-0.00981232	-0.00990917	-0.0099128	-0.00996962		-69.9563	-59.824	-60.387	-60.856	-61.5441	-61.7629	-62.2008	-62.6698	-62.8888	-63.3265	-62.7324	-61.7004
22.66	-0.00246479	-0.00751877	-0.00809665	-0.00857105	-0.00897311	-0.00926825	-0.00951648	-0.00969021	-0.00982004	-0.00990853	-0.00993312	-0.00998535		-70.0188	-59.824	-60.4495	-60.9811	-61.7003	-61.7942	-62.2946	-62.6385	-62.9512	-63.2953	-62.9513	-61.8254
22.68	-0.00246358	-0.00752936	-0.00810108	-0.00857555	-0.00896411	-0.00927204	-0.00951168	-0.00969621	-0.00982037	-0.0098982	-0.00993331	-0.00998094		-69.925	-59.7927	-60.3556	-60.9186	-61.4815	-61.7629	-62.1695	-62.6698	-62.92	-63.1389	-62.92	-61.7004
22.7	-0.00246474	-0.00754005	-0.00810982	-0.00859084	-0.00897346	-0.00927592	-0.00952366	-0.00969973	-0.00982802	-0.00990531	-0.00992867	-0.00999174		-69.9563	-59.7615	-60.3244	-61.0124	-61.5128	-61.7317	-62.2633	-62.6698	-62.9825	-63.2015	-62.8262	-61.763
22.72	-0.0024653	-0.00755645	-0.00812066	-0.00859309	-0.00897383	-0.00928676	-0.00953304	-0.00970326	-0.00982826	-0.00990984	-0.00993161	-0.00999738		-69.9563	-59.824	-60.3244	-60.9186	-61.4189	-61.7942	-62.3259	-62.6699	-62.9513	-63.2328	-62.8262	-61.7629
22.74	-0.0024676	-0.00756703	-0.00813956	-0.00861266	-0.00899002	-0.00929053	-0.00954932	-0.00971156	-0.00983827	-0.00991428	-0.00994436	-0.0100006		-70.0501	-59.7927	-60.4495	-61.0749	-61.544	-61.7629	-62.4821	-62.7324	-63.0451	-63.264	-62.9513	-61.7316
22.76	-0.00246753	-0.00757771	-0.00814799	-0.00861897	-0.00898583	-0.00930359	-0.00955107	-0.00971252	-0.00983835	-0.0099211	-0.00994944	-0.0100038		-70.0188	-59.7615	-60.4182	-61.0436	-61.3876	-61.8567	-62.4509	-62.7011	-63.0138	-63.3265	-62.9825	-61.7003
22.78	-0.00246865	-0.007596	-0.00816864	-0.00862752	-0.00899766	-0.00931409	-0.00955053	-0.00972314	-0.00985063	-0.00992778	-0.00995444	-0.010022		-70.0501	-59.8553	-60.5745	-61.0437	-61.4502	-61.9193	-62.3883	-62.7949	-63.1389	-63.3891	-63.0138	-61.8567
22.8	-0.002468	-0.00761024	-0.00816859	-0.00863818	-0.00900263	-0.00931059	-0.00955487	-0.00971674	-0.00984562	-0.00993674	-0.00995446	-0.01002		-69.9875	-59.8866	-60.4181	-61.0749	-61.4189	-61.7941	-62.3883	-62.6698	-63.045	-63.4828	-62.9825	-61.7629
22.82	-0.00246971	-0.00762061	-0.00818725	-0.00865733	-0.0090166	-0.00933049	-0.00956865	-0.00972744	-0.00985055	-0.00994306	-0.00996683	-0.0100306		-70.0501	-59.8553	-60.5433	-61.2313	-61.5127	-61.9818	-62.5134	-62.7636	-63.0764	-63.5454	-63.1076	-61.8255
22.84	-0.00246849	-0.00763297	-0.00819741	-0.00865461	-0.00901468	-0.00932219	-0.00956322	-0.00972112	-0.00983841	-0.00993456	-0.00995679	-0.0100311		-69.9563	-59.8553	-60.5433	-61.075	-61.3877	-61.7942	-62.3884	-62.6386	-62.8888	-63.4203	-62.9513	-61.763
22.86	-0.00246904	-0.00764911	-0.00820756	-0.00866519	-0.00901981	-0.00933747	-0.00956754	-0.00972949	-0.00985099	-0.00993612	-0.0099545	-0.0100317		-69.9563	-59.9178	-60.5433	-61.1063	-61.3564	-61.9193	-62.3884	-62.7011	-63.0138	-63.4203	-62.8888	-61.7004
22.88	-0.0024696	-0.00766127	-0.00821568	-0.00866707	-0.00902725	-0.00934549	-0.00956713	-0.00973531	-0.00985356	-0.00993524	-0.00995235	-0.01003		-69.9563	-59.9178	-60.5121	-61.0124	-61.3564	-61.9506	-62.3258	-62.7324	-63.0138	-63.3891	-62.8262	-61.6066
22.9	-0.0024719	-0.00767153	-0.00823409	-0.00867783	-0.00904364	-0.00936499	-0.00957872	-0.00973864	-0.00986584	-0.00992954	-0.0099651	-0.0100461		-70.0501	-59.8866	-60.6372	-61.0437	-61.4815	-62.1382	-62.4197	-62.7323	-63.1389	-63.2953	-62.9513	-61.7316
22.92	-0.00247184	-0.00767617	-0.00823987	-0.00868203	-0.00905072	-0.00936316	-0.00958058	-0.00973958	-0.00986324	-0.00992893	-0.00997016	-0.0100393		-70.0188	-59.7615	-60.5746	-60.9811	-61.4815	-62.0444	-62.3884	-62.7011	-63.0763	-63.2639	-62.9825	-61.5753
22.94	-0.00247178	-0.00768882	-0.00824787	-0.00869072	-0.00905555	-0.0093662	-0.00958726	-0.00974057	-0.00986565	-0.0099333	-0.00996532	-0.010043		-69.9875	-59.7615	-60.5433	-60.9811	-61.4502	-62.0131	-62.4196	-62.6697	-63.0763	-63.2952	-62.8887	-61.544
22.96	-0.00247233	-0.00769955	-0.00825188	-0.00869724	-0.0090672	-0.00937627	-0.00959385	-0.00975128	-0.00986319	-0.00992536	-0.00997545	-0.0100393		-69.9875	-59.7302	-60.4495	-60.9498	-61.5127	-62.0756	-62.4508	-62.7636	-63.0138	-63.1701	-62.9825	-61.4189
22.98	-0.00247229	-0.00771229	-0.00826434	-0.00870602	-0.00907418	-0.00938154	-0.009598	-0.00975935	-0.00987062	-0.00992261	-0.00996815	-0.0100359		-69.9563	-59.7302	-60.4808	-60.9499	-61.5128	-62.0757	-62.4509	-62.8262	-63.0764	-63.1076	-62.8575	-61.2938
23	-0.00247342	-0.00772312	-0.00828287	-0.00871478	-0.00908564	-0.00937984	-0.00959029	-0.00976003	-0.00987545	-0.00991755	-0.00997097	-0.0100553		-69.9875	-59.6989	-60.6058	-60.9498	-61.5752	-61.9818	-62.2945	-62.7949	-63.1076	-63.0137	-62.8574	-61.4502
23.02	-0.00247397	-0.00773596	-0.00829075	-0.0087257	-0.0090902	-0.00938767	-0.0095972	-0.00976078	-0.00987534	-0.0099274	-0.00998118	-0.0100569		-69.9875	-59.6989	-60.5745	-60.9811	-61.544	-62.0131	-62.3257	-62.7636	-63.0763	-63.1076	-62.9512	-61.3876
23.04	-0.00247509	-0.00775648	-0.00830491	-0.00873653	-0.00909482	-0.00939309	-0.00961116	-0.00976643	-0.00988261	-0.00993212	-0.00997394	-0.0100685		-70.0188	-59.824	-60.6371	-61.0124	-61.5127	-62.013	-62.4509	-62.7949	-63.1389	-63.1389	-62.8262	-61.4501
23.06	-0.00247562	-0.007767	-0.0083168	-0.00873644	-0.00910855	-0.00939154	-0.00961291	-0.00976718	-0.00988973	-0.00993678	-0.00997192	-0.0100775		-70.0188	-59.7927	-60.6683	-60.8873	-61.6065	-61.9192	-62.4196	-62.7636	-63.2015	-63.1702	-62.7637	-61.4814
23.08	-0.00247614	-0.00777954	-0.00833481	-0.00875622	-0.00911525	-0.00939489	-0.00962187	-0.00977524	-0.00989426	-0.00993645	-0.00997743	-0.0100889		-70.0188	-59.7927	-60.7934	-61.0437	-61.6066	-61.888	-62.4822	-62.8262	-63.2327	-63.1389	-62.7949	-61.544
23.1	-0.00247609	-0.00779594	-0.00833799	-0.00876251	-0.00911517	-0.00939831	-0.00961878	-0.00977107	-0.00989385	-0.009946	-0.00997547	-0.0100901		-69.9875	-59.8553	-60.6996	-61.0123	-61.5127	-61.8567	-62.3883	-62.7323	-63.2014	-63.2327	-62.7323	-61.4815
23.12	-0.00247663	-0.00780441	-0.00834971	-0.00876672	-0.00912212	-0.00940647	-0.00962544	-0.00977921	-0.00990082	-0.00994062	-0.0099786	-0.010099		-69.9875	-59.7927	-60.7309	-60.9498	-61.5127	-61.888	-62.4196	-62.7949	-63.264	-63.1389	-62.7323	-61.5127
23.14	-0.00247659	-0.00781888	-0.00835719	-0.00877982	-0.00912907	-0.00940289	-0.00963203	-0.00977512	-0.00989545	-0.00994527	-0.00997433	-0.0100978		-69.9563	-59.824	-60.6997	-61.0124	-61.5128	-61.7629	-62.451	-62.7011	-63.1702	-63.1702	-62.6385	-61.4189
23.16	-0.0024783	-0.00783909	-0.0083772	-0.0087949	-0.00914053	-0.00942295	-0.00964566	-0.0097785	-0.00990736	-0.00995964	-0.00998263	-0.0100994		-70.0188	-59.9491	-60.856	-61.1062	-61.5753	-61.9505	-62.576	-62.7011	-63.2952	-63.3265	-62.7011	-61.3564
23.18	-0.00247824	-0.00785502	-0.0083843	-0.00879445	-0.00914502	-0.00942385	-0.00963993	-0.00977945	-0.00990923	-0.00995648	-0.00998089	-0.0101011		-69.9875	-60.0116	-60.8247	-60.9811	-61.5439	-61.888	-62.4509	-62.6697	-63.2952	-63.2639	-62.6385	-61.2938
23.2	-0.0024782	-0.00786882	-0.0083811	-0.00880745	-0.00914962	-0.00942725	-0.00964166	-0.00978291	-0.00990867	-0.00995348	-0.00998178	-0.010098		-69.9563	-60.0429	-60.6371	-61.0437	-61.5128	-61.8568	-62.4197	-62.6698	-63.264	-63.2015	-62.6073	-61.1687
23.22	-0.00247934	-0.00788642	-0.00839299	-0.00883118	-0.0091588	-0.00944005	-0.00965298	-0.0097936	-0.00992037	-0.00996041	-0.00997781	-0.0101078		-69.9875	-60.1367	-60.6683	-61.2625	-61.5439	-61.9505	-62.5134	-62.7636	-63.3891	-63.2639	-62.5134	-61.2
23.24	-0.00247987	-0.00789593	-0.00840272	-0.00883681	-0.00917018	-0.00945262	-0.00966647	-0.00979681	-0.00990492	-0.00996721	-0.00998394	-0.0101025		-69.9875	-60.1055	-60.6683	-61.2312	-61.6065	-62.0444	-62.6385	-62.7636	-63.1701	-63.3265	-62.5446	-61.0436
23.26	-0.00248041	-0.00791336	-0.00841243	-0.00884689	-0.00917684	-0.0094579	-0.00965578	-0.00981212	-0.00990708	-0.0099665	-0.00997273	-0.0101077		-69.9875	-60.1993	-60.6683	-61.2625	-61.6065	-62.0443	-62.4509	-62.92	-63.1701	-63.2952	-62.357	-61.0123
23.28	-0.00248153	-0.00792854	-0.00841798	-0.00885031	-0.00918123	-0.00946319	-0.00966465	-0.00981494	-0.00990923	-0.00996831	-0.00998174	-0.0101155		-70.0188	-60.2618	-60.6059	-61.2	-61.5753	-62.0443	-62.5135	-62.92	-63.1701	-63.2952	-62.4196	-61.0124
23.3	-0.00248264	-0.00793765	-0.00843205	-0.0088561	-0.00919479	-0.00948253	-0.00966619	-0.0098105	-0.00991139	-0.00997504	-0.00997824	-0.0101233		-70.0501	-60.2306	-60.6684	-61.1688	-61.6691	-62.232	-62.4822	-62.8262	-63.1702	-63.3578	-62.3258	-61.0124
23.32	-0.00248315	-0.00794881	-0.00845013	-0.00887075	-0.00920127	-0.00948498	-0.00968215	-0.00981597	-0.00991354	-0.00997179	-0.00997992	-0.0101185		-70.0501	-60.2306	-60.7935	-61.2626	-61.6692	-62.2008	-62.6386	-62.8575	-63.1702	-63.2953	-62.2945	-60.8561
23.34	-0.00248307	-0.00795799	-0.00845736	-0.00887854	-0.00921228	-0.00949453	-0.00968096	-0.00982377	-0.00991812	-0.00996868	-0.00997181	-0.0101243		-70.0188	-60.1993	-60.7622	-61.2626	-61.7316	-62.2633	-62.5759	-62.92	-63.2014	-63.2327	-62.1381	-60.8248
23.36	-0.00248476	-0.00797517	-0.00847098	-0.00888632	-0.00922313	-0.00951096	-0.0096943	-0.00983385	-0.00991775	-0.00997554	-0.00997646	-0.0101377		-70.0813	-60.2931	-60.8247	-61.2625	-61.7941	-62.4196	-62.701	-63.0138	-63.1701	-63.2952	-62.1382	-60.8872
23.38	-0.00248409	-0.00798416	-0.00847811	-0.00888529	-0.00921784	-0.00951056	-0.00968818	-0.00983401	-0.00992478	-0.0099749	-0.00997123	-0.0101433		-70.0188	-60.2618	-60.7935	-61.1374	-61.6378	-62.3571	-62.576	-62.9826	-63.2327	-63.264	-62.0131	-60.856
23.4	-0.00248345	-0.00799918	-0.00847902	-0.00889123	-0.00921754	-0.00951736	-0.00969194	-0.00983424	-0.00991456	-0.00996694	-0.00996635	-0.010139		-69.9563	-60.3244	-60.6684	-61.1062	-61.544	-62.3884	-62.576	-62.9513	-63.0764	-63.1389	-61.8881	-60.6997
23.42	-0.00248341	-0.00801004	-0.0084866	-0.00890828	-0.00922434	-0.00950996	-0.0096933	-0.00983454	-0.00992425	-0.00996911	-0.00996426	-0.0101503		-69.925	-60.3244	-60.6371	-61.2313	-61.544	-62.232	-62.5447	-62.92	-63.1702	-63.1389	-61.7942	-60.7309
23.44	-0.00248631	-0.0080209	-0.00851113	-0.00892718	-0.00924028	-0.00952649	-0.0097115	-0.00984462	-0.00992639	-0.00997374	-0.00997726	-0.0101615		-70.0501	-60.3244	-60.856	-61.3877	-61.6691	-62.3884	-62.7324	-63.0138	-63.1702	-63.1702	-61.888	-60.7622
23.46	-0.00248565	-0.00802977	-0.0085097	-0.00894122	-0.00923757	-0.0095332	-0.00970528	-0.00984234	-0.00993342	-0.00997336	-0.00996774	-0.0101524		-69.9875	-60.2931	-60.6996	-61.4814	-61.544	-62.4196	-62.6073	-62.9513	-63.2327	-63.1388	-61.7003	-60.5433
23.48	-0.00248618	-0.00804272	-0.00852563	-0.00894614	-0.00925352	-0.00952805	-0.00971852	-0.00983535	-0.00992316	-0.00997061	-0.00997607	-0.0101591		-69.9875	-60.3244	-60.7935	-61.4501	-61.6691	-62.2945	-62.7323	-62.8262	-63.0763	-63.0763	-61.7316	-60.512
23.5	-0.00248788	-0.00805956	-0.00853705	-0.00896446	-0.00926454	-0.00953971	-0.00972668	-0.0098408	-0.00994265	-0.00997539	-0.00998182	-0.0101786		-70.0501	-60.4182	-60.8248	-61.6066	-61.7317	-62.3884	-62.7949	-62.8574	-63.2952	-63.1076	-61.7316	-60.6371
23.52	-0.00248781	-0.00806813	-0.00854413	-0.00898012	-0.00927309	-0.00954405	-0.00972027	-0.0098486	-0.00993714	-0.0099727	-0.00999747	-0.0101825		-70.0188	-60.3869	-60.7935	-61.7316	-61.7629	-62.3883	-62.6698	-62.92	-63.2014	-63.0451	-61.8567	-60.5745
23.54	-0.00248832	-0.00808079	-0.00855554	-0.00899324	-0.00927695	-0.00954604	-0.00973097	-0.00984654	-0.00993675	-0.00997754	-0.00999543	-0.0101917		-70.0188	-60.4182	-60.8247	-61.8254	-61.7316	-62.3571	-62.7636	-62.8575	-63.1701	-63.0763	-61.7629	-60.5746
23.56	-0.00248767	-0.00809336	-0.00855838	-0.00898609	-0.00927631	-0.00954574	-0.00972704	-0.00984948	-0.00993398	-0.00997739	-0.0100011	-0.0101806		-69.9563	-60.4495	-60.731	-61.6379	-61.6378	-62.2946	-62.6699	-62.8575	-63.1077	-63.0451	-61.7629	-60.3244
23.58	-0.0024888	-0.00809981	-0.00857421	-0.00900167	-0.00928052	-0.00955267	-0.00974494	-0.00984997	-0.0099387	-0.00997976	-0.0100067	-0.0101855		-69.9875	-60.3869	-60.8247	-61.7629	-61.6065	-62.3257	-62.8574	-62.8261	-63.1389	-63.045	-61.7628	-60.2618
23.6	-0.00248875	-0.00811448	-0.00858341	-0.00899243	-0.00929401	-0.00955953	-0.00973356	-0.00985543	-0.00993844	-0.00997723	-0.0100124	-0.010183		-69.9563	-60.4495	-60.8248	-61.544	-61.7004	-62.3571	-62.6698	-62.8575	-63.1076	-62.9826	-61.7629	-60.1055
23.62	-0.0024893	-0.00812695	-0.00859685	-0.00899492	-0.00930033	-0.00956394	-0.00973464	-0.00986809	-0.00995788	-0.00997482	-0.0100205	-0.0101862		-69.9563	-60.4807	-60.8873	-61.4815	-61.7004	-62.3571	-62.6385	-62.9826	-63.3266	-62.92	-61.7942	-60.0117
23.64	-0.00249101	-0.0081353	-0.00860797	-0.00901095	-0.00931586	-0.00956126	-0.00974542	-0.00986828	-0.00996452	-0.00996766	-0.0100236	-0.0102024		-70.0188	-60.4495	-60.9185	-61.6066	-61.8254	-62.2633	-62.7323	-62.9513	-63.389	-62.7949	-61.7629	-60.0742
23.66	-0.00249094	-0.00814374	-0.00861901	-0.00902216	-0.00931722	-0.0095659	-0.00973912	-0.00986853	-0.00995632	-0.00998048	-0.0100317	-0.0102056		-69.9875	-60.4182	-60.9498	-61.669	-61.7629	-62.2633	-62.6072	-62.9199	-63.264	-62.92	-61.7941	-59.9803
23.68	-0.00249089	-0.00815226	-0.00862782	-0.00901759	-0.00932567	-0.00956582	-0.00974999	-0.00987374	-0.00995086	-0.00998562	-0.0100322	-0.0102117		-69.9563	-60.3869	-60.9499	-61.5128	-61.7942	-62.2008	-62.7011	-62.9513	-63.1702	-62.9513	-61.7317	-59.9178
23.7	-0.00249319	-0.00816492	-0.00864732	-0.0090313	-0.00933403	-0.00958244	-0.0097582	-0.00988617	-0.00996278	-0.00998574	-0.0100479	-0.0102334		-70.0501	-60.4182	-61.1062	-61.6066	-61.8255	-62.3571	-62.7636	-63.0763	-63.2953	-62.92	-61.8568	-60.0429
23.72	-0.0024937	-0.00817546	-0.00864924	-0.00903134	-0.0093446	-0.00959157	-0.00976145	-0.00988613	-0.00996706	-0.00998841	-0.0100533	-0.0102418		-70.0501	-60.4182	-61.0124	-61.5127	-61.888	-62.4197	-62.7637	-63.0451	-63.3266	-62.92	-61.8567	-60.0117
23.74	-0.0024942	-0.00818803	-0.00866214	-0.00904058	-0.00934114	-0.00960053	-0.00976227	-0.00988859	-0.00996388	-0.00999354	-0.0100486	-0.0102631		-70.0501	-60.4495	-61.0749	-61.544	-61.7629	-62.4821	-62.7324	-63.0451	-63.264	-62.9513	-61.7316	-60.1367
23.76	-0.00249411	-0.00819643	-0.00866842	-0.00903629	-0.0093542	-0.00960223	-0.00976317	-0.00988861	-0.00997068	-0.00999858	-0.0100518	-0.0102558		-70.0188	-60.4182	-61.0436	-61.3876	-61.8567	-62.4509	-62.7011	-63.0138	-63.3265	-62.9825	-61.7003	-59.9179
23.78	-0.00249346	-0.00821103	-0.00867049	-0.0090414	-0.00935775	-0.0095945	-0.00976656	-0.00989358	-0.00996996	-0.00999616	-0.0100626	-0.0102647		-69.9563	-60.4807	-60.9499	-61.3564	-61.8255	-62.2945	-62.7011	-63.0451	-63.2953	-62.92	-61.7629	-59.8866
23.8	-0.002494	-0.00821526	-0.00868573	-0.00905108	-0.00935905	-0.00960379	-0.00976513	-0.0098936	-0.00998405	-0.0100013	-0.0100657	-0.0102788		-69.9563	-60.3869	-61.0437	-61.3877	-61.7629	-62.3571	-62.6386	-63.0138	-63.4516	-62.9513	-61.7317	-59.9179
23.82	-0.00249513	-0.00823199	-0.00870284	-0.00906289	-0.00937675	-0.00961528	-0.00977348	-0.00989612	-0.00998795	-0.0100113	-0.0100739	-0.010285		-69.9875	-60.4807	-61.1687	-61.4501	-61.9192	-62.4508	-62.701	-63.0138	-63.4828	-63.045	-61.7629	-59.8553
23.84	-0.00249448	-0.00824437	-0.00870237	-0.00906332	-0.00937083	-0.00961229	-0.00976963	-0.00988645	-0.00998195	-0.0100037	-0.010077	-0.0102864		-69.925	-60.512	-61.0437	-61.3564	-61.7629	-62.3571	-62.6073	-62.8575	-63.389	-62.92	-61.7317	-59.7302
23.86	-0.00249563	-0.00825665	-0.00871518	-0.00907074	-0.00938854	-0.00961903	-0.00978048	-0.00990155	-0.009986	-0.0100039	-0.0100802	-0.0102882		-69.9563	-60.5433	-61.1063	-61.3564	-61.9193	-62.3884	-62.7011	-63.0138	-63.4203	-62.8888	-61.7004	-59.6052
23.88	-0.00249734	-0.00826884	-0.00872133	-0.00908264	-0.00940118	-0.00962331	-0.0097911	-0.00990895	-0.00998998	-0.0100066	-0.0100835	-0.0103085		-70.0188	-60.5746	-61.0749	-61.4189	-62.0131	-62.3883	-62.7949	-63.0763	-63.4516	-62.8887	-61.6691	-59.699
23.9	-0.00249727	-0.00827888	-0.00872324	-0.00908987	-0.00941124	-0.00962521	-0.00978457	-0.00991132	-0.00997421	-0.0100094	-0.0100893	-0.0103104		-69.9875	-60.5746	-60.9811	-61.4189	-62.0756	-62.3571	-62.6697	-63.0763	-63.2327	-62.8887	-61.669	-59.5738
23.92	-0.00249838	-0.00828892	-0.00873191	-0.00910161	-0.00941416	-0.00963195	-0.00979044	-0.00991369	-0.00997861	-0.0100195	-0.0100876	-0.0103283		-70.0188	-60.5746	-60.9811	-61.4815	-62.0444	-62.3884	-62.7011	-63.0763	-63.2639	-62.9825	-61.5753	-59.6363
23.94	-0.0024983	-0.00829689	-0.00874057	-0.0091064	-0.00941715	-0.0096386	-0.00979138	-0.00991605	-0.00998294	-0.0100146	-0.0100913	-0.0103433		-69.9875	-60.5433	-60.9811	-61.4502	-62.0131	-62.4196	-62.6697	-63.0763	-63.2952	-62.8887	-61.544	-59.6676
23.96	-0.00250059	-0.00830702	-0.00875356	-0.00912481	-0.0094342	-0.00965231	-0.00980933	-0.00992086	-0.00998228	-0.0100321	-0.010095	-0.0103478		-70.0813	-60.5433	-61.0436	-61.6065	-62.1694	-62.5446	-62.8574	-63.1076	-63.2639	-63.0763	-61.5127	-59.5737
23.98	-0.00250049	-0.0083192	-0.00876204	-0.0091315	-0.00943919	-0.00965618	-0.00981715	-0.00992804	-0.00997923	-0.0100245	-0.0100912	-0.0103476		-70.0501	-60.5746	-61.0437	-61.6066	-62.1695	-62.5447	-62.92	-63.1702	-63.2014	-62.9513	-61.3876	-59.4175
24	-0.00249981	-0.00833128	-0.00876399	-0.00913592	-0.00943017	-0.00964097	-0.00981028	-0.00992528	-0.00996649	-0.0100196	-0.0101029	-0.0103505		-69.9875	-60.6058	-60.9498	-61.5752	-61.9818	-62.2945	-62.7949	-63.1076	-63.0137	-62.8574	-61.4502	-59.2923
24.02	-0.00250152	-0.00834328	-0.00877925	-0.00914495	-0.00944265	-0.00965262	-0.00981583	-0.00993	-0.00998126	-0.0100348	-0.0101094	-0.0103772		-70.0501	-60.6371	-61.0437	-61.6066	-62.0757	-62.3883	-62.8262	-63.1389	-63.1702	-63.0138	-61.4502	-59.4487
24.04	-0.00250084	-0.00835104	-0.00878335	-0.00914256	-0.00944085	-0.00965927	-0.00981402	-0.00992976	-0.00997842	-0.0100198	-0.0101133	-0.0103748		-69.9875	-60.6058	-60.9811	-61.4814	-61.9817	-62.4196	-62.7636	-63.1076	-63.1076	-62.7949	-61.4188	-59.2611
24.06	-0.00250254	-0.00836718	-0.00878764	-0.00916092	-0.00944398	-0.00966583	-0.00981964	-0.00994184	-0.00998804	-0.0100228	-0.0101274	-0.0103939		-70.0501	-60.6996	-60.9186	-61.6378	-61.9505	-62.4509	-62.7949	-63.2328	-63.2015	-62.795	-61.5127	-59.3236
24.08	-0.00250068	-0.00837681	-0.00879864	-0.00915843	-0.00943785	-0.00966514	-0.00981791	-0.00993646	-0.00997774	-0.0100183	-0.0101287	-0.0103789		-69.925	-60.6996	-60.9499	-61.5128	-61.7942	-62.3884	-62.7324	-63.1389	-63.0451	-62.7011	-61.4502	-58.9797
24.1	-0.002503	-0.00838853	-0.0088139	-0.00916762	-0.00945083	-0.00967177	-0.00982359	-0.00994601	-0.00999734	-0.0100264	-0.0101402	-0.0104148		-70.0188	-60.7309	-61.0436	-61.544	-61.888	-62.4196	-62.7636	-63.2327	-63.264	-62.7636	-61.5128	-59.2298
24.12	-0.00250351	-0.00840015	-0.00881798	-0.00917445	-0.00945888	-0.00967832	-0.00983163	-0.00995288	-0.00999181	-0.0100294	-0.0101489	-0.0104131		-70.0188	-60.7622	-60.9811	-61.544	-61.9193	-62.4509	-62.8262	-63.2953	-63.1702	-62.7636	-61.544	-59.0422
24.14	-0.00250343	-0.00840751	-0.00883097	-0.00918128	-0.00945513	-0.00968479	-0.00982737	-0.00994735	-0.00999634	-0.010025	-0.0101475	-0.0104253		-69.9875	-60.7309	-61.0436	-61.544	-61.7941	-62.4822	-62.7323	-63.2014	-63.2014	-62.6697	-61.4501	-59.0109
24.16	-0.00250395	-0.00842329	-0.0088416	-0.0091881	-0.00947046	-0.00969357	-0.00982578	-0.00995429	-0.0100057	-0.0100282	-0.0101439	-0.010448		-69.9875	-60.8247	-61.0749	-61.544	-61.9192	-62.5447	-62.6698	-63.2639	-63.2952	-62.6698	-61.3251	-59.1047
24.18	-0.00250389	-0.00843046	-0.00884117	-0.00919264	-0.00947139	-0.00968783	-0.00982677	-0.0099562	-0.0100026	-0.0100265	-0.0101457	-0.0104442		-69.9563	-60.7935	-60.9499	-61.5127	-61.8568	-62.4197	-62.6385	-63.264	-63.2327	-62.6073	-61.2626	-58.8859
24.2	-0.0025056	-0.00843352	-0.00886084	-0.0092041	-0.00948186	-0.00969676	-0.00983753	-0.00996299	-0.010007	-0.0100348	-0.0101502	-0.010457		-70.0188	-60.6996	-61.1062	-61.5753	-61.9193	-62.4822	-62.7323	-63.3265	-63.264	-62.6698	-61.2312	-58.8546
24.22	-0.00250611	-0.00844314	-0.00888227	-0.00921082	-0.00949215	-0.00970553	-0.00984564	-0.00997211	-0.0100113	-0.0100282	-0.0101573	-0.0104778		-70.0188	-60.6996	-61.2938	-61.5752	-61.9818	-62.5447	-62.7949	-63.4204	-63.2952	-62.5447	-61.2313	-58.9171
24.24	-0.00250721	-0.00845484	-0.00888996	-0.00922439	-0.00950698	-0.00972135	-0.00985117	-0.00995891	-0.0100204	-0.0100367	-0.0101543	-0.0104825		-70.0501	-60.7309	-61.2938	-61.6691	-62.107	-62.7011	-62.8262	-63.2327	-63.3891	-62.6072	-61.1062	-58.7921
24.26	-0.00250711	-0.00846226	-0.00889765	-0.00922856	-0.00950971	-0.00970798	-0.0098639	-0.00995841	-0.0100171	-0.0100227	-0.0101567	-0.0104983		-70.0188	-60.6996	-61.2938	-61.6378	-62.0756	-62.4822	-62.9513	-63.2014	-63.3265	-62.3883	-61.0436	-58.792
24.28	-0.0025088	-0.00846976	-0.00890313	-0.00923509	-0.00951723	-0.00971915	-0.00986903	-0.00996289	-0.0100212	-0.0100341	-0.0101669	-0.0105036		-70.0813	-60.6684	-61.2625	-61.6378	-62.1068	-62.576	-62.9825	-63.2326	-63.3577	-62.4821	-61.0749	-58.6669
24.3	-0.0025081	-0.00847735	-0.00890209	-0.00924162	-0.00952938	-0.00971328	-0.00985706	-0.0099575	-0.0100204	-0.0100229	-0.0101669	-0.0105199		-70.0188	-60.6371	-61.1375	-61.6378	-62.2007	-62.4509	-62.7949	-63.1389	-63.3265	-62.2945	-60.9811	-58.6669
24.32	-0.00250861	-0.00849555	-0.00891684	-0.00924816	-0.00953186	-0.00972934	-0.00986257	-0.00995968	-0.0100171	-0.0100246	-0.0101621	-0.0105284		-70.0188	-60.7622	-61.2313	-61.6379	-62.1695	-62.6073	-62.8262	-63.1389	-63.264	-62.2632	-60.8248	-58.5731
24.34	-0.00250911	-0.00850495	-0.0089269	-0.00926155	-0.00954384	-0.00973057	-0.00987288	-0.00996676	-0.0100165	-0.010019	-0.0101705	-0.0105398		-70.0188	-60.7622	-61.2626	-61.7316	-62.2633	-62.5759	-62.92	-63.2014	-63.2327	-62.1381	-60.8248	-58.5106
24.36	-0.00250962	-0.00851435	-0.00893023	-0.00926781	-0.00955558	-0.00973911	-0.00987808	-0.00996142	-0.0100184	-0.0100186	-0.0101788	-0.0105489		-70.0188	-60.7622	-61.2	-61.7316	-62.3571	-62.6385	-62.9513	-63.1076	-63.2327	-62.0757	-60.8247	-58.4168
24.38	-0.00250953	-0.00852375	-0.00893152	-0.00926488	-0.00955762	-0.00973546	-0.00988077	-0.00997103	-0.0100203	-0.010016	-0.0101872	-0.0105558		-69.9875	-60.7622	-61.1061	-61.6065	-62.3258	-62.5447	-62.9513	-63.2014	-63.2327	-61.9818	-60.8247	-58.2916
24.4	-0.00251123	-0.00853314	-0.00894637	-0.00927378	-0.00957393	-0.00974888	-0.00989077	-0.0099706	-0.0100222	-0.010021	-0.010193	-0.0105685		-70.0501	-60.7622	-61.2	-61.6378	-62.4822	-62.6698	-63.0451	-63.1702	-63.2327	-61.9819	-60.7935	-58.2292
24.42	-0.00251054	-0.0085383	-0.00896095	-0.00927799	-0.00956383	-0.00974753	-0.00988834	-0.00997761	-0.0100216	-0.0100161	-0.0102014	-0.0105841		-69.9875	-60.6996	-61.2938	-61.6065	-62.2945	-62.6072	-62.9825	-63.2327	-63.2014	-61.8567	-60.7934	-58.1979
24.44	-0.00251047	-0.00855211	-0.00896861	-0.00928228	-0.0095684	-0.00975358	-0.00988607	-0.00996727	-0.0100137	-0.0100165	-0.0101997	-0.0105999		-69.9563	-60.7622	-61.2939	-61.5753	-62.2946	-62.6386	-62.92	-63.0764	-63.0764	-61.7942	-60.6684	-58.1667
24.46	-0.00251219	-0.00855937	-0.00899182	-0.00928895	-0.00958478	-0.00975713	-0.00989371	-0.00998433	-0.0100234	-0.0100171	-0.0102009	-0.0106211		-70.0188	-60.7309	-61.5127	-61.5753	-62.4509	-62.6386	-62.9826	-63.264	-63.1701	-61.7316	-60.5746	-58.1979
24.48	-0.0025121	-0.00857309	-0.00899439	-0.00930253	-0.0095771	-0.0097679	-0.00988411	-0.00997144	-0.0100181	-0.0100228	-0.010205	-0.0106316		-69.9875	-60.7935	-61.4501	-61.6691	-62.2945	-62.7323	-62.8262	-63.0763	-63.0763	-61.7316	-60.512	-58.104
[truncated: 8,773 more rows]

## Sheet: 6E_F
Data related to Figure 6E and F
[truncated: 7,002 more rows]

## Sheet: 6G
Data related to Figure 6G
[truncated: 14 more rows]

## Sheet: Fig6_supl_file1
Data related to Fig6_supplementary File 1: onset kinetics of the presynaptic calcium current vs recording series resistance
[truncated: 28 more rows]
